# Supplementary material for: Untargeted metabolites profiling of volatile components of Chinese Antique Lotus (Nelumbo nucifera Gaertn.) using solid-phase microextraction (SPME) GC/MS
Source: PeerJ. 2025 Jun 19;13:e19600. doi: 10.7717/peerj.19600 (PMC12182725; doi:10.7717/peerj.19600)
Supplement: Supplemental Information 12 — These tables were compiled using data extracted and analyzed from the original files, which include results from GC-MS and other relevant analytical methods. For further details or access to specific raw data files, please refer to the supplementary materials or contact the corresponding author. [file peerj-13-19600-s012.xlsx]

## Sheet: ZNH
This page presents the raw data for ZNH, which serves as the source for the Average±SD results in Tables S2-S4. In the subsequent statistical analysis, the data for each organization is categorized based on different types of compounds, separated by spaces. For instance, in the Petal data statistics provided on this page, compounds No. 1-12 are classified as monoterpenes, No. 13-16 as sesquiterpe…
Petal
No.	RT1	Area1	Content1（ng/g/h FW）	RT2	Area2	Content2（ng/g/h FW）	RT3	Area3	Content3（ng/g/h FW）	Average	SD	AV±SD	Compound	CAS	RI
1	6.856	189674	6.75459	6.862	91739	2.94311	6.855	242117	8.79555	6.16441	2.42542	6.16±2.43	3-Thujene	2867-05-2	929
2	7.075	722201	27.4796	7.075	347895	12.9123	7.075	1.03865e+06	39.7952	26.729	10.9877	26.73±10.99	1R-α-Pinene	7785-70-8	929
3	8.511	2.04918e+06	79.1232	8.511	1.13414e+06	43.5118	8.511	3.25933e+06	126.22	82.9518	33.874	82.95±33.87	Sabinen	3387-41-5	974
4	8.609	321093	11.8692	8.615	159523	5.58116	8.608	472111	17.7466	11.7323	4.96745	11.73±4.97	β-Pinene	127-91-3	979
5	9.217	956763	36.6084	9.217	482798	18.1624	9.216	1.41197e+06	54.3243	36.365	14.764	36.37±14.76	β-Myrcene	123-35-3	991
6	10.206	914994	34.9828	10.213	432682	16.212	10.206	1.29618e+06	49.8178	33.6709	13.7508	33.67±13.75	α-Terpinene	99-86-5	1017
7	10.704	1.19801e+06	45.9972	10.704	614890	23.3033	10.704	1.86452e+06	71.9367	47.0791	19.8692	47.08±19.87	D-Limonene	5989-27-5	1030
8	10.788	2.7186e+06	105.176	10.788	1.63389e+06	62.961	10.788	4.15796e+06	161.193	109.777	40.235	109.78±40.23	Eucalyptol	470-82-6	1032
9	12.005	1.69319e+06	65.269	12.011	840152	32.0701	12.004	2.49814e+06	96.5962	64.6451	26.3464	64.65±26.35	γ-Terpinene	99-85-4	1060
10	13.298	392191	14.6362	13.298	192989	6.88358	13.292	609289	23.0853	14.8683	6.61635	14.87±6.62	Terpinolene	586-62-9	1088
11	17.251	1.77406e+06	68.4162	17.251	940334	35.969	17.25	2.55264e+06	98.7173	67.7009	25.6219	67.7±25.62	Terpinen-4-ol	562-74-3	1177
12	17.865	638393	24.218	17.865	448917	16.8439	17.865	1.31172e+06	50.4229	30.4949	14.4092	30.49±14.41	α-Terpineol	98-55-5	1189
Total			520.53			277.354			798.651	532.178	212.978	532.18±212.98
13	27.801	8.61495e+06	717.767	27.794	6.20005e+06	519.632	27.807	9.82843e+06	817.329	684.909	123.735	684.91±123.74	Caryophyllene	87-44-5	1419
14	29.185	1.00851e+06	93.6827	29.192	683869	67.0469	29.185	1.04931e+06	97.0306	85.9201	13.4151	85.92±13.42	Humulene	6753-98-6	1454
15	30.324	184131	26.045	30.324	85170.5	17.9256	30.324	177681	25.5158	23.1622	3.70909	23.16±3.71	Germacrene D	23986-74-5	1481
16	32.083	103101	19.3968	32.077	42472	14.4223	32.083	33151.7	13.6576	15.8256	2.54443	15.83±2.54	δ-Cadinene	483-76-1	1524
Total			856.891			619.027			953.533	809.817	140.56	809.82±140.56
17	10.536	189120	65.7305	10.543	88801	63.0307	10.542	252633	67.4398	65.4003	1.81512	65.4±1.82	o-Cymene	527-84-4	1022
18	16.694	3.51596e+07	1006.89	16.681	2.6597e+07	776.441	16.681	2.631e+07	768.718	850.682	110.498	850.68±110.5	Benzene, 1,4-dimethoxy-	150-78-7	1168
Total			1072.62			839.472			836.158	916.082	110.695	916.08±110.7
19	22.29	68718.9	9.88563	22.277	96273.9	10.444	22.29	132920	11.1865	10.5054	0.532856	10.51±0.53	(6E)-6-Tridecene	6434-76-0	1277
20	22.84	1.10479e+06	30.8793	22.84	1.35543e+06	35.9581	22.839	1.60989e+06	41.1141	35.9838	4.17837	35.98±4.18	Tridecane	629-50-5	1300
21	26.559	196017	12.465	26.546	249844	13.5557	26.552	299115	14.5541	13.525	0.853134	13.52±0.85	(E)-4-Tetradecene	41446-78-0	1379
22	26.785	318080	14.9384	26.779	447545	17.5617	26.785	370242	15.9953	16.1651	1.07767	16.17±1.08	1-Tetradecene	1120-36-1	1392
23	27.115	2.9516e+06	68.3008	27.122	3.85907e+06	86.6886	27.122	4.55854e+06	100.862	85.2838	13.33	85.28±13.33	Tetradecane	629-59-4	1400
24	30.699	4.37929e+07	895.86	30.705	5.23549e+07	1069.35	30.705	5.29388e+07	1081.18	1015.46	84.7104	1015.46±84.71	1-Pentadecene	13360-61-7	1492
25	31.359	1.51293e+08	3074.11	31.372	1.71026e+08	3473.95	31.397	2.20255e+08	4471.48	3673.18	587.611	3673.18±587.61	Pentadecane	629-62-9	1500
26	34.231	1.69447e+06	42.8278	34.237	1.9487e+06	47.9794	34.237	2.72844e+06	63.779	51.5287	8.91389	51.53±8.91	(Z)-7-Hexadecene	35507-09-6	1566
27	34.774	486899	18.3591	34.768	751911	23.729	34.768	590994	20.4684	20.8522	2.20898	20.85±2.21	Cetene	629-73-2	1592
28	35.052	1.3345e+06	35.5339	35.052	1.96332e+06	48.2755	35.052	1.99902e+06	48.9989	44.2695	6.18402	44.27±6.18	Hexadecane	544-76-3	1600
29	37.666	5.02e+07	1025.69	37.666	4.96608e+07	1014.76	37.691	76144755	1551.4	1197.28	250.438	1197.28±250.44	6,9-Heptadecadiene	81265-03-4	1667
30	37.924	2.86801e+07	589.633	37.918	2.83527e+07	582.999	37.957	5.14911e+07	1051.85	741.493	219.47	741.49±219.47	8-Heptadecene	2579-04-6	—
31	38.267	1.33653e+07	279.311	38.261	1.14156e+07	239.805	38.267	1.302e+07	272.314	263.81	17.2126	263.81±17.21	1-Heptadecene	—/6765-39-5	1692
32	38.746	9.25482e+06	196.022	38.739	1.01289e+07	213.734	38.752	1.28466e+07	268.801	226.185	30.989	226.19±30.99	Heptadecane	629-78-7	1700
Total			6293.81			6878.79			9013.98	7395.53	1169.07	7395.53±1169.07
Stamen
No.	RT1	Area1	Content1（ng/g/h FW）	RT2	Area2	Content2（ng/g/h FW）	RT3	Area3	Content3（ng/g/h FW）	Average	SD	AV±SD	Compound	CAS	RI
1	6.856	72989.6	2.21341	6.856	110162	3.66008	6.862	68396.2	2.03465	2.63605	0.72777	2.64±0.73	3-Thujene	2867-05-2	929
2	7.082	294517	10.8349	7.082	398606	14.8858	7.082	231813	8.39454	11.3718	2.67712	11.37±2.68	1R-α-Pinene	7785-70-8	929
3	8.511	872983	33.3478	8.511	1.6544e+06	63.7591	8.511	887260	33.9034	43.6701	14.2069	43.67±14.21	Sabinen	3387-41-5	974
4	8.615	180593	6.40114	8.615	247069	8.9883	8.615	140920	4.85715	6.74886	1.70436	6.75±1.7	β-Pinene	127-91-3	979
5	9.236	598349	22.6595	9.223	664464	25.2326	9.236	530398	20.015	22.6357	2.13016	22.64±2.13	β-Myrcene	123-35-3	991
6	9.268	1.97583e+06	76.2688	9.268	1.7034e+06	65.666	9.268	2.23488e+06	86.3507	76.0952	8.44536	76.1±8.45	(+)-2-Carene	—	991
7	10.213	812991	31.013	10.213	1.00286e+06	38.4024	10.213	517100	19.4974	29.6376	7.77895	29.64±7.78	α-Terpinene	99-86-5	1017
8	10.704	1.24847e+06	47.9613	10.704	1.58423e+06	61.0283	10.704	850402	32.469	47.1528	11.6733	47.15±11.67	D-Limonene	5989-27-5	1030
9	10.788	2.71901e+06	105.192	10.788	3.31512e+06	128.392	10.788	1.78681e+06	68.9123	100.832	24.4773	100.83±24.48	Eucalyptol	470-82-6	1032
10	12.011	2.07167e+06	79.9987	12.011	2.42692e+06	93.8243	12.011	1.20896e+06	46.4236	73.4155	19.9032	73.42±19.9	γ-Terpinene	99-85-4	1060
11	13.298	571606	21.6187	13.298	667708	25.3588	13.298	360401	13.399	20.1255	4.99545	20.13±5	Terpinolene	586-62-9	1088
12	13.699	343205	12.7297	13.693	301635	11.1119	13.699	376568	14.0282	12.6233	1.19294	12.62±1.19	cis-2-p-Menthen-1-ol	29803-82-5	1122
13	17.27	523271	19.7376	17.27	693533	26.3639	17.263	322240	11.9138	19.3385	5.90598	19.34±5.91	Terpinen-4-ol	562-74-3	1177
14	17.885	49436.1	1.29675	17.878	88907.6	2.83292	17.878	39559.4	0.912366	1.68068	0.82973	1.68±0.83	α-Terpineol	98-55-5	1189
15	18.603	414313	15.4972	18.609	219215	7.90427	18.609	479322	18.0272	13.8095	4.3015	13.81±4.3	α-Cyclogeraniol	6627-74-3	1184
Total			486.77			577.41			381.138	481.773	80.2057	481.77±80.21
16	25.99	106003	19.6349	25.996	136640	22.1485	25.99	110627	20.0143	20.5992	1.10641	20.6±1.11	Copaene	3856-25-5	1376
17	26.708	76701.1	17.2307	26.714	83098.5	17.7556	26.714	65725.4	16.3302	17.1055	0.588618	17.11±0.59	(-)-β-Elemene	515-13-9	1391
18	27.833	3.51858e+07	2897.82	27.84	4.26684e+07	3511.74	27.833	3.33488e+07	2747.1	3052.22	330.705	3052.22±330.71	Caryophyllene	87-44-5	1419
19	28.163	121007	20.8659	28.163	133919	21.9253	28.163	117673	20.5924	21.1279	0.574839	21.13±0.57	cis-β-Farnesene	28973-97-9	1444
20	29.192	4.67781e+06	394.737	29.192	5.54365e+06	465.777	29.192	4.04139e+06	342.521	401.011	50.5142	401.01±50.51	Humulene	6753-98-6	1454
21	30.168	85058	17.9164	30.175	65084.5	16.2776	30.162	49258.4	14.9791	16.3911	1.2018	16.39±1.2	γ-Muurolene	30021-74-0	1477
22	30.317	1.03291e+06	95.6843	30.317	1.12173e+06	102.972	30.317	819365	78.1639	92.2734	10.4111	92.27±10.41	Germacrene D	23986-74-5	1481
23	30.945	297937	35.3825	30.945	312938	36.6132	30.945	216273	28.6822	33.5593	3.48503	33.56±3.49	(+)-Bicyclogermacrene	24703-35-3	1495
24	31.391	158868	23.9723	31.398	181938	25.8651	31.391	126275	21.2982	23.7118	1.87353	23.71±1.87	δ-Guaiene	3691-11-0	1505
25	31.656	155716	23.7136	31.65	181493	25.8285	31.65	123621	21.0804	23.5408	1.94228	23.54±1.94	γ-Cadinene	39029-41-9	1513
26	32.044	507672	52.5905	32.044	581178	58.6215	32.044	385927	42.6017	51.2712	6.60624	51.27±6.61	δ-Cadinene	483-76-1	1524
27	32.562	45226.8	14.6484	32.568	51576.2	15.1693	32.568	28407.3	13.2684	14.362	0.802032	14.36±0.8	α-Cadinene	24406-05-1	1538
28	34.27	2.50106e+06	216.142	34.27	2.39181e+06	207.178	34.276	1.32933e+06	120.005	181.108	43.3613	181.11±43.36	Caryophyllene oxide	1139-30-6	1581
29	36.133	67554.4	16.4803	36.126	90281.8	18.345	36.126	102675	19.3618	18.0624	1.19324	18.06±1.19	γ-Eudesmol	1209-71-8	1631
30	36.475	174021	25.2155	36.469	130939	21.6808	36.475	78219	17.3553	21.4172	3.21434	21.42±3.21	α-epi-Cadinol	5937-11-1	1640
31	36.98	197377	27.1318	36.973	179575	25.6712	36.973	112852	20.1968	24.3333	2.98507	24.33±2.99	α-Cadinol	481-34-5	1653
Total			3899.17			4593.57			3543.55	4012.1	436.043	4012.1±436.04
32	10.536	746543	80.7324	10.543	730925	80.312	10.536	386635	71.0462	77.3635	4.47032	77.36±4.47	o-Cymene	527-84-4	1022
33	16.765	9.17996e+07	2531.23	16.772	1.00951e+08	2777.53	16.765	9.06456e+07	2500.17	2602.98	124.075	2602.98±124.08	Benzene, 1,4-dimethoxy-	150-78-7	1168
Total			2611.96			2857.84			2571.22	2680.34	126.608	2680.34±126.61
34	5.096	47123	9.44803	5.096	36249.6	9.22771	5.096	69144.2	9.89424	9.52333	0.277272	9.52±0.28	1-Hexanol	111-27-3	868
35	5.322	26279.2	9.02568	5.322	28939.3	9.07958	5.322	42855.7	9.36156	9.15561	0.147287	9.16±0.15	1-Butanol, 3-methyl-, acetate	123-92-2	876
36	22.84	127207	11.0707	22.846	150509	11.5429	22.839	113321	10.7894	11.1344	0.310896	11.13±0.31	Tridecane	629-50-5	1300
37	26.785	49125.9	9.48862	26.792	66976.1	9.85031	26.792	57146	9.65113	9.66335	0.147914	9.66±0.15	1-Tetradecene	1120-36-1	1392
38	26.986	308654	14.7474	26.992	470854	18.034	26.992	717710	23.036	18.6058	3.40789	18.61±3.41	Jasmone	488-10-8	1394
39	27.115	167614	11.8895	27.122	258736	13.7359	27.115	207538	12.6985	12.7746	0.755704	12.77±0.76	Tetradecane	629-59-4	1400
40	30.641	1.27303e+06	34.2883	30.641	1.59767e+06	40.8665	30.641	1.22724e+06	33.3604	36.1717	3.34124	36.17±3.34	1-Pentadecene	13360-61-7	1492
41	31.191	4.24994e+06	94.6088	31.197	6.12565e+06	132.616	31.19	3.99941e+06	89.5324	105.586	19.2253	105.59±19.23	Pentadecane	629-62-9	1500
42	35.052	43970.4	9.38415	35.052	53699.1	9.58128	35.052	31308	9.12758	9.36434	0.185754	9.36±0.19	Hexadecane	544-76-3	1600
43	37.601	991074	28.5751	37.601	1.28638e+06	34.5588	37.601	608801	20.8292	27.9877	5.62044	27.99±5.62	6,9-Heptadecadiene	81265-03-4	1667
44	37.879	1.27184e+06	34.2642	37.879	1.7997e+06	44.9601	37.873	951091	27.765	35.6631	7.08922	35.66±7.09	8-Heptadecene	2579-04-6	—
45	38.241	799368	24.6906	38.241	1.04037e+06	29.5739	38.241	717140	23.0245	25.763	2.77924	25.76±2.78	1-Heptadecene	—/6765-39-5	1692
46	38.726	574404	20.1322	38.72	631686	21.2929	38.726	395732	16.5118	19.3123	2.03615	19.31±2.04	Heptadecane	629-78-7	1700
Total			311.613			384.92			295.582	330.705	38.8903	330.7±38.89
Receptacle
No.	RT1	Area1	Content1（ng/g/h FW）	RT2	Area2	Content2（ng/g/h FW）	RT3	Area3	Content3（ng/g/h FW）	Average	SD	AV±SD	Compound	CAS	RI
1	7.082	97343.5	3.16123	7.082	200262	7.16666	7.082	134377	4.60249	4.97679	1.65649	4.98±1.66	1R-α-Pinene	7785-70-8	929
2	8.511	61033.1	1.74809	8.518	114146	3.81517	8.512	99650.9	3.25103	2.93809	0.872411	2.94±0.87	Sabinen	3387-41-5	974
3	8.615	58386.5	1.64508	8.621	116741	3.91615	8.609	75143.9	2.29725	2.6195	0.954747	2.62±0.95	β-Pinene	127-91-3	979
4	9.275	483682	18.1969	9.275	788645	30.0655	9.275	812028	30.9755	26.4127	5.82129	26.41±5.82	(+)-2-Carene	—	991
5	10.219	182630	6.48042	10.213	439790	16.4887	10.213	231651	8.38823	10.4524	4.33873	10.45±4.34	α-Terpinene	99-86-5	1017
6	10.711	262034	9.57071	10.711	570647	21.5814	10.711	282666	10.3737	13.8419	5.48243	13.84±5.48	D-Limonene	5989-27-5	1030
7	10.788	2.82054e+06	109.143	10.788	3.9376e+06	152.617	10.789	2.06694e+06	79.8144	113.858	29.9081	113.86±29.91	Eucalyptol	470-82-6	1032
8	12.011	657370	24.9565	12.011	1.32882e+06	51.0881	12.011	646147	24.5197	33.5214	12.4228	33.52±12.42	γ-Terpinene	99-85-4	1060
9	13.298	173271	6.1162	13.298	359938	13.381	13.298	163398	5.73197	8.40971	3.51871	8.41±3.52	Terpinolene	586-62-9	1088
10	17.257	317388	11.725	17.251	503976	18.9867	17.264	302677	11.1524	13.9547	3.56581	13.95±3.57	Terpinen-4-ol	562-74-3	1177
Total			192.743			319.107			181.107	230.986	62.4918	230.99±62.49
														R² = 0.9997
11	27.794	3.26956e+06	279.195	27.795	5.66184e+06	475.474	27.795	4.58794e+06	387.364	380.677	80.2697	380.68±80.27	Caryophyllene	87-44-5	1419
12	29.192	352034	39.821	29.185	615759	61.4587	29.185	499870	51.9504	51.0767	8.85516	51.08±8.86	Humulene	6753-98-6	1454
13	29.45	29010.3	13.3179	29.45	39922.7	14.2132	29.457	43356.3	14.4949	14.0086	0.501819	14.01±0.5	(E)-β-Famesene	18794-84-8	1457
14	30.311	35655.8	13.8631	30.311	74660.5	17.0633	30.317	54643.3	15.421	15.4491	1.30663	15.45±1.31	Germacrene D	23986-74-5	1481
15	31.055	52441.7	15.2403	31.055	67008.5	16.4355	31.061	69300.2	16.6235	16.0998	0.612549	16.1±0.61	δ-Selinene	28624-23-9	1493
16	32.044	37928.1	14.0495	32.044	58899.9	15.7702	32.038	41038	14.3047	14.7081	0.75818	14.71±0.76	δ-Cadinene	483-76-1	1524
17	36.119	93628.9	18.6196	36.133	374935	41.6999	36.139	30143.2	13.4108	24.5768	12.2932	24.58±12.29	γ-Eudesmol	1209-71-8	1631
Total			394.106			642.114			513.569	516.597	101.271	516.6±101.27
18	10.542	391079	71.1658	10.543	726641	80.1967	10.549	327709	69.4604	73.6076	4.71093	73.61±4.71	o-Cymene	527-84-4	1022
19	16.688	2.96397e+07	858.33	16.707	4.0916e+07	1161.81	16.701	3.53684e+07	1012.51	1010.88	123.899	1010.88±123.9	Benzene, 1,4-dimethoxy-	150-78-7	1168
Total			929.496			1242			1081.97	1084.49	127.593	1084.49±127.59
20	5.096	114397	10.8112	5.103	80883.8	10.1321	5.083	374259	16.0767	12.34	2.65676	12.34±2.66	1-Hexanol	111-27-3	868
21	22.833	76452.3	10.0423	22.84	107714	10.6758	22.84	105808	10.6371	10.4518	0.289938	10.45±0.29	Tridecane	629-50-5	1300
22	27.115	71872.2	9.94952	27.122	105171	10.6242	27.115	104802	10.6168	10.3968	0.316319	10.4±0.32	Tetradecane	629-59-4	1400
23	30.634	467926	17.9747	30.634	631757	21.2944	30.634	507556	18.7777	19.3489	1.41416	19.35±1.41	1-Pentadecene	13360-61-7	1492
24	31.19	1.53652e+06	39.6274	31.184	2.32369e+06	55.5775	31.191	1.37167e+06	36.287	43.8307	8.4175	43.83±8.42	Pentadecane	629-62-9	1500
25	37.607	228902	13.1314	37.601	498572	18.5957	37.601	94526.7	10.4086	14.0452	3.40426	14.05±3.4	6,9-Heptadecadiene	81265-03-4	1667
26	37.879	432730	17.2615	37.879	810304	24.9122	37.886	246700	13.492	18.5553	4.75118	18.56±4.75	8-Heptadecene	2579-04-6	—
27	38.248	189547	12.3339	38.235	348023	15.5451	38.248	127982	11.0865	12.9885	1.87815	12.99±1.88	1-Heptadecene	6765-39-5	1692
28	38.733	145878	11.4491	38.727	253837	13.6366	38.727	96084	10.4401	11.8419	1.33421	11.84±1.33	Heptadecane	629-78-7	1700
Total			142.581			180.994			137.823	153.799	19.3273	153.8±19.33

## Sheet: KF
This page displays the raw data for KF, which is used to calculate the Average±SD results presented in Tables S2-S4.																This page shows the raw data for ZNH from which the Average±SD results are derived (source for Tables S2-S4)																This page shows the raw data for ZNH from which the Average±SD results are derived (source for Tables S2-S4)																This page shows the raw data for ZNH from which the Average±SD results are derived (source for Tables S2-S4)
Petal
No.	RT1	Area1	Content1（ng/g/h FW）	RT2	Area2	Content2（ng/g/h FW）	RT3	Area3	Content3（ng/g/h FW）	Average	SD	AV±SD	Compound	CAS	RI
1	6.855	415632	15.5485	6.855	327795	12.13	6.849	247882	9.01992	12.2328	2.66626	12.23±2.67	3-Thujene	2867-05-2	929
2	7.075	1.82514e+06	70.404	7.075	1.33455e+06	51.3111	7.069	954200	36.5086	52.7412	13.8746	52.74±13.87	1R-α-Pinene	7785-70-8	929
3	8.511	6.4887e+06	251.902	8.511	4689754	181.89	8.505	5.02532e+06	194.95	209.581	30.3969	209.58±30.4	Sabinen	3387-41-5	974
4	8.608	812057	30.9766	8.608	585905	22.1752	8.602	463481	17.4107	23.5209	5.61942	23.52±5.62	β-Pinene	127-91-3	979
5	9.216	2.5302e+06	97.8439	9.217	1.9203e+06	74.1076	9.21	1.10857e+06	42.5165	71.4894	22.6631	71.49±22.66	β-Myrcene	123-35-3	991
6	10.206	2.14404e+06	82.8154	10.206	1.60671e+06	61.9032	10.2	805417	30.7183	58.4789	21.4059	58.48±21.41	α-Terpinene	99-86-5	1017
8	10.704	3.1625e+06	122.452	10.704	2.36912e+06	91.5751	10.698	1.61958e+06	62.4043	92.1438	24.5177	92.14±24.52	D-Limonene	5989-27-5	1030
9	10.782	6.76965e+06	262.836	10.782	4.88789e+06	189.601	10.782	4.5627e+06	176.945	209.794	37.8605	209.79±37.86	Eucalyptol	470-82-6	1032
10	12.004	4.04399e+06	156.758	12.005	2.94774e+06	114.094	11.998	1.84451e+06	71.158	114.003	34.9461	114±34.95	γ-Terpinene	99-85-4	1060
11	13.292	1.05105e+06	40.2777	13.292	731543	27.8432	13.285	500264	18.8422	28.9877	8.78835	28.99±8.79	Terpinolene	586-62-9	1088
14	17.257	5.41252e+06	210.019	17.257	2.44203e+06	94.4124	17.251	2.34676e+06	90.7049	131.712	55.392	131.71±55.39	Terpinen-4-ol	562-74-3	1177
15	17.865	2.00057e+06	77.2317	17.865	1.18598e+06	45.5292	17.865	1.06264e+06	40.7288	54.4966	16.1952	54.5±16.2	α-Terpineol	98-55-5	1189
Total			1419.06			966.572			791.908	1059.18	264.278	1059.18±264.28
22	27.794	6.34642e+06	531.641	27.801	9.70824e+06	807.468	27.794	2.11361e+06	184.353	507.821	254.943	507.82±254.94	Caryophyllene	87-44-5	1419
24	29.185	671424	66.0259	29.185	1.08014e+06	99.5598	29.179	194036	26.8577	64.1478	29.7102	64.15±29.71	Humulene	6753-98-6	1454
26	30.388	622820	62.0381	30.388	462641	48.8959	30.388	189746	26.5057	45.8132	14.6689	45.81±14.67	Germacrene D	23986-74-5	1481
38	36.126	111145	20.0568	36.126	139449	22.379	36.126	61928.9	16.0187	19.4848	2.62787	19.48±2.63	γ-Eudesmol	1209-71-8	1631
Total			679.762			978.302			253.735	637.266	297.326	637.27±297.33
7	10.536	379032	70.8416	10.536	265149	67.7767	10.53	172472	65.2825	67.9669	2.27348	67.97±2.27	o-Cymene	527-84-4	1022
13	16.694	3.80077e+07	1083.54	16.707	4.44158e+07	1256	16.72	5.34063e+07	1497.96	1279.16	169.977	1279.16±169.98	Benzene, 1,4-dimethoxy-	150-78-7	1168
Total			1154.38			1323.77			1563.24	1347.13	167.732	1347.13±167.73
12	13.861	132357	11.1751	13.867	190519	12.3536	13.861	47421.8	9.45409	10.9943	1.19062	10.99±1.19	Undecane	1120-21-4	1100
16	22.839	1.21283e+06	33.0685	22.839	1.4403e+06	37.6777	22.839	616857	20.9924	30.5795	7.03542	30.58±7.04	Tridecane	629-50-5	1300
19	26.779	292211	14.4142	26.779	304416	14.6615	26.772	169856	11.9349	13.6702	1.23117	13.67±1.23	1-Tetradecene	1120-36-1	1392
21	27.115	3.75333e+06	84.5462	27.122	3.40431e+06	77.474	27.115	2.06314e+06	50.2982	70.7728	14.7628	70.77±14.76	Tetradecane	629-59-4	1400
28	30.686	3.62869e+07	743.766	30.686	3.56234e+07	730.322	30.666	2.20087e+07	454.452	642.847	133.328	642.85±133.33	1-Pentadecene	13360-61-7	1492
30	31.352	152318540	3094.89	31.333	1.32976e+08	2702.97	31.32	1.07774e+08	2192.3	2663.39	369.542	2663.39±369.54	Pentadecane	629-62-9	1500
36	34.768	422534	17.0549	34.768	376055	16.1131	34.768	332154	15.2236	16.1305	0.747749	16.13±0.75	Cetene	629-73-2	1592
37	35.052	1.4329e+06	37.5277	35.052	1.07012e+06	30.1768	35.052	1.145e+06	31.694	33.1328	3.16874	33.13±3.17	Hexadecane	544-76-3	1600
39	37.666	5.38083e+07	1098.8	37.653	4.0255e+07	824.172	37.646	3.27672e+07	672.449	865.141	176.451	865.14±176.45	6,9-Heptadecadiene	81265-03-4	1667
41	37.931	4.11658e+07	842.627	37.924	3.00378e+07	617.142	37.911	2.33788e+07	482.213	647.327	148.678	647.33±148.68	8-Heptadecene	2579-04-6	—
42	38.261	9.07628e+06	192.404	38.254	7.53009e+06	161.074	38.248	5.4035e+06	117.983	157.154	30.5084	157.15±30.51	1-Heptadecene	6765-39-5	1692
43	38.739	8.57553e+06	182.257	38.733	6.46521e+06	139.496	38.739	8.10944e+06	172.813	164.856	18.3415	164.86±18.34	Heptadecane	629-78-7	1700
Total			6352.53			5363.63			4231.81	5315.99	866.437	5315.99±866.44
This page shows the raw data for KF from which the Average±SD results are derived (source for Tables S2-S4)
Stamen
No.	RT1	Area1	Content1（ng/g/h FW）	RT2	Area2	Content2（ng/g/h FW）	RT3	Area3	Content3（ng/g/h FW）	Average	SD	AV±SD	Compound	CAS	RI
1	6.862	80359.7	2.50024	6.856	174586	6.16736	6.862	92390.2	2.96845	3.87868	1.62959	3.88±1.63	3-Thujene	2867-05-2	929
2	7.082	345437	12.8166	7.076	958173	36.6632	7.075	512051	19.3009	22.9269	10.0673	22.93±10.07	1R-α-Pinene	7785-70-8	929
3	8.511	1.01387e+06	38.8308	8.505	2.14877e+06	82.9993	8.505	1.48649e+06	57.2243	59.6848	18.1155	59.68±18.12	Sabinen	3387-41-5	974
4	8.608	229106	8.28921	8.609	638672	24.2288	8.608	354419	13.1662	15.2281	6.66866	15.23±6.67	β-Pinene	127-91-3	979
5	9.217	2.06617e+06	79.7846	9.217	1761274	67.9186	9.216	931483	35.6245	61.1092	18.6602	61.11±18.66	β-Myrcene	123-35-3	991
6	9.268	3.30092e+06	127.839	9.268	3.01942e+06	116.883	9.268	2.79147e+06	108.012	117.578	8.10919	117.58±8.11	(+)-2-Carene	—	991
7	10.206	1.10786e+06	42.4888	10.206	3.43844e+06	133.191	10.206	1.7108e+06	65.9541	80.5446	38.4395	80.54±38.44	α-Terpinene	99-86-5	1017
8	10.704	1.5596e+06	60.0698	10.704	4.32776e+06	167.802	10.704	2.43903e+06	94.2958	107.389	44.9453	107.39±44.95	D-Limonene	5989-27-5	1030
9	10.782	3.23416e+06	125.241	10.788	8.89471e+06	345.54	10.782	5.00471e+06	194.148	221.643	92.0142	221.64±92.01	Eucalyptol	470-82-6	1032
10	12.004	2.49343e+06	96.4129	12.011	7.47119e+06	290.139	12.004	3.97918e+06	154.236	180.262	81.2013	180.26±81.2	γ-Terpinene	99-85-4	1060
11	13.292	673347	25.5783	13.292	1.96901e+06	76.0032	13.292	1.07732e+06	41.3001	47.6272	21.0664	47.63±21.07	Terpinolene	586-62-9	1088
12	13.699	401627	15.0034	13.693	387814	14.4658	13.693	530603	20.0229	16.4974	2.50258	16.5±2.5	cis-2-p-Menthen-1-ol	29803-82-5	1122
13	17.276	833472	31.8101	17.27	2.91657e+06	112.881	17.283	1.4614e+06	56.2479	66.9796	33.9558	66.98±33.96	Terpinen-4-ol	562-74-3	1177
14	17.872	105410	3.47515	17.872	250724	9.13054	17.878	229385	8.30006	6.96858	2.49339	6.97±2.49	α-Terpineol	98-55-5	1189
Total			670.14			1484.01			870.801	1008.32	346.199	1008.32±346.2
15	27.833	3.89347e+07	3205.41	27.82	2.48305e+07	2048.2	27.84	4.52639e+07	3724.7	2992.77	700.749	2992.77±700.75	Caryophyllene	87-44-5	1419
16	28.157	139039	22.3454	28.157	92555.1	18.5315	28.163	171493	25.0081	21.9617	2.65795	21.96±2.66	cis-β-Farnesene	28973-97-9	1444
17	29.192	5.01097e+06	422.072	29.185	2.86413e+06	245.93	29.192	5.92976e+06	497.456	388.486	105.395	388.49±105.4	Humulene	6753-98-6	1454
18	29.632	204781	27.7393	29.632	107096	19.7245	29.632	239587	30.595	26.0196	4.60143	26.02±4.6	γ-Gurjunene	22567-17-5	1473
19	30.317	1.06936e+06	98.6752	30.317	476641	50.0445	30.317	1.34699e+06	121.454	90.0578	29.7827	90.06±29.78	Germacrene D	23986-74-5	1481
20	30.945	224944	29.3936	30.945	82040.9	17.6688	30.945	365843	40.9539	29.3388	9.50617	29.34±9.51	(+)-Bicyclogermacrene	24703-35-3	1495
21	31.391	166027	24.5596	31.398	88098.9	18.1659	31.391	269380	33.0394	25.255	6.09197	25.25±6.09	δ-Guaiene	3691-11-0	1505
22	31.65	156798	23.8024	31.643	80845.8	17.5708	31.656	211358	28.2789	23.2174	4.3911	23.22±4.39	γ-Cadinene	39029-41-9	1513
23	32.044	516897	53.3474	32.044	250679	31.505	32.044	651169	64.364	49.7388	13.6551	49.74±13.66	δ-Cadinene	483-76-1	1524
24	34.276	2.92675e+06	251.068	34.263	437059	46.797	34.276	3.4636e+06	295.115	197.66	108.181	197.66±108.18	Caryophyllene oxide	1139-30-6	1581
25	36.12	160860	24.1357	36.126	302724	35.7752	36.12	202784	27.5755	29.1621	4.88245	29.16±4.88	γ-Eudesmol	1209-71-8	1631
26	36.98	238140	30.4762	36.896	121159	20.8784	36.98	299523	35.5126	28.9557	6.07037	28.96±6.07	α-Cadinol	481-34-5	1653
Total			4213.02			2570.79			4924.05	3902.62	985.467	3902.62±985.47
27	10.536	562676	75.784	10.536	1.61932e+06	104.221	10.536	876593	84.2324	88.0793	11.9239	88.08±11.92	o-Cymene	527-84-4	1022
28	16.804	137502716	3761.23	16.778	1.11953e+08	3073.61	16.817	1.50265e+08	4104.71	3646.52	428.687	3646.52±428.69	Benzene, 1,4-dimethoxy-	150-78-7	1168
Total			3837.02			3177.83			4188.94	3734.6	419.087	3734.6±419.09
29	5.09	104710	10.6149	5.096	57964.1	9.6677	5.096	32063.8	9.14289	9.8085	0.609139	9.81±0.61	1-Hexanol	111-27-3	868
30	22.839	141914	11.3688	22.84	157798	11.6906	22.839	151665	11.5663	11.5419	0.132532	11.54±0.13	Tridecane	629-50-5	1300
31	24.942	110389	10.73	24.916	70366.8	9.91902	24.955	126514	11.0567	10.5686	0.478281	10.57±0.48	2,2,4-Trimethyl-1,3-pentanediol diisobutyrate	6846-50-0	1588
32	26.986	881592	26.3567	26.98	3.14583e+06	72.2366	26.992	867958	26.0804	41.5579	21.6934	41.56±21.69	Jasmone	488-10-8	1394
33	27.115	254423	13.6485	27.109	403289	16.6649	27.122	282283	14.213	14.8422	1.30934	14.84±1.31	Tetradecane	629-59-4	1400
34	30.641	1.84281e+06	45.8337	30.634	1.88536e+06	46.6959	30.641	1.86069e+06	46.196	46.2419	0.353492	46.24±0.35	1-Pentadecene	13360-61-7	1492
35	31.197	6.27062e+06	135.553	31.191	7.02174e+06	150.773	31.197	7.33537e+06	157.128	147.818	9.05234	147.82±9.05	Pentadecane	629-62-9	1500
36	37.607	1.47849e+06	38.4516	37.601	995956	28.6741	37.601	1.93268e+06	47.6546	38.2601	7.74996	38.26±7.75	6,9-Heptadecadiene	81265-03-4	1667
37	37.873	2.21045e+06	53.2831	37.873	1.67067e+06	42.3457	37.879	2.92177e+06	67.6964	54.4417	10.3818	54.44±10.38	8-Heptadecene	2579-04-6	—
38	38.235	990006	28.5535	38.241	727269	23.2297	38.241	1.15218e+06	31.8396	27.8743	3.54765	27.87±3.55	1-Heptadecene	6765-39-5	1692
39	38.726	654824	21.7618	38.727	567862	19.9997	38.726	820098	25.1107	22.2907	2.11982	22.29±2.12	Heptadecane	629-78-7	1700
Total			396.156			431.897			447.685	425.246	21.556	425.25±21.56
Receptacle
No.	RT1	Area1	Content1（ng/g/h FW）	RT2	Area2	Content2（ng/g/h FW）	RT3	Area3	Content3（ng/g/h FW）	Average	SD	AV±SD	Compound	CAS	RI
1	7.082	98835.4	3.21929	7.075	213067	7.665	7.075	123684	4.18634	5.02354	1.90906	5.02±1.91	1R-α-Pinene	7785-70-8	929
2	8.511	60035.5	1.70926	8.511	96474.5	3.1274	8.511	77141.3	2.37499	2.40389	0.579315	2.4±0.58	Sabinen	3387-41-5	974
3	8.615	70248.4	2.10673	8.608	156364	5.45822	8.615	93408.7	3.00809	3.52435	1.4161	3.52±1.42	β-Pinene	127-91-3	979
4	9.268	1.0436e+06	39.988	9.268	1.04945e+06	40.2155	9.275	926493	35.4303	38.5446	2.20412	38.54±2.2	(+)-2-Carene	—	991
5	10.213	369007	13.7339	10.213	1105798	42.4086	10.213	551112	20.8211	25.6545	12.1951	25.65±12.2	α-Terpinene	99-86-5	1017
6	10.711	425638	15.9379	10.704	1.192e+06	45.7634	10.711	610507	23.1327	28.278	12.7082	28.28±12.71	D-Limonene	5989-27-5	1030
7	10.782	3.82551e+06	148.255	10.782	8.78865e+06	341.412	10.788	4.69591e+06	182.13	223.932	84.2141	223.93±84.21	Eucalyptol	470-82-6	1032
8	12.011	1.07568e+06	41.2363	12.011	3.09043e+06	119.647	12.005	1.52654e+06	58.783	73.2221	33.5999	73.22±33.6	γ-Terpinene	99-85-4	1060
9	13.298	284020	10.4263	13.292	831934	31.7502	13.298	395141	14.751	18.9759	9.20378	18.98±9.2	Terpinolene	586-62-9	1088
10	13.699	68610.9	2.043	13.706	44795.7	1.11615	13.693	52979.6	1.43466	1.53127	0.384501	1.53±0.38	cis-2-p-Menthen-1-ol	29803-82-5	1122
11	17.251	759391	28.927	17.257	2.67435e+06	103.454	17.257	1.07857e+06	41.349	57.91	32.6013	57.91±32.6	Terpinen-4-ol	562-74-3	1177
12	17.878	95481.9	3.08877	17.865	295806	10.885	17.878	109417	3.63112	5.86831	3.55427	5.87±3.55	α-Terpineol	98-55-5	1189
13	18.609	150779	5.24086	18.609	96322.8	3.1215	18.609	119952	4.04111	4.13449	0.86774	4.13±0.87	α-Cyclogeraniol	6627-74-3	1184
Total			315.912			756.024			395.073	489.003	191.558	489±191.56
14	27.797	6.48044e+06	542.637	27.794	5.19368e+06	437.063	27.794	5.41686e+06	455.374	478.358	46.063	478.36±46.06	Caryophyllene	87-44-5	1419
15	28.15	46638	14.7642	28.15	32482.9	13.6028	28.15	33227.4	13.6639	14.0103	0.533664	14.01±0.53	cis-β-Farnesene	28973-97-9	1444
16	29.185	732064	71.0012	29.185	611854	61.1383	29.185	587771	59.1624	63.7673	5.17834	63.77±5.18	Humulene	6753-98-6	1454
17	30.317	99219.4	19.0783	30.317	74287.7	17.0327	30.324	72557.4	16.8908	17.6673	0.999432	17.67±1	Germacrene D	23986-74-5	1481
18	31.061	79881.4	17.4917	31.067	73298.5	16.9516	31.061	34982.6	13.8079	16.0837	1.62429	16.08±1.62	δ-Selinene	28624-23-9	1493
19	32.038	75428.1	17.1263	32.044	61644.6	15.9954	32.038	52530.7	15.2476	16.1231	0.772257	16.12±0.77	δ-Cadinene	483-76-1	1524
20	34.27	74654.8	17.0628	34.263	61287.9	15.9661	34.257	39093.2	14.1451	15.7247	1.20333	15.72±1.2	Caryophyllene oxide	1139-30-6	1581
21	36.126	651574	64.3972	36.126	604397	60.5265	36.126	286619	34.4538	53.1258	13.2974	53.13±13.3	γ-Eudesmol	1209-71-8	1631
22	36.786	156080	23.7435	36.792	208732	28.0635	36.779	46417.8	14.7461	22.1843	5.54745	22.18±5.55	β-Eudesmol	473-15-4	1649
23	36.902	181441	25.8243	36.896	253615	31.7459	36.896	31714.9	13.5398	23.7033	7.58243	23.7±7.58	α-Eudesmol	473-16-5	1653
Total			813.127			698.086			651.031	720.748	68.0879	720.75±68.09
24	10.543	373261	70.6863	10.542	968696	86.7111	10.543	536551	75.0809	77.4928	6.76077	77.49±6.76	o-Cymene	527-84-4	1022
25	14.437	52902.6	62.0645	14.443	38796.1	61.6849	14.424	40139.3	61.721	61.8235	0.171084	61.82±0.17	Phenylethyl Alcohol	60-12-8	1116
26	16.72	5.87915e+07	1642.89	16.714	4.79573e+07	1351.31	16.714	4.64173e+07	1309.86	1434.69	148.189	1434.69±148.19	Benzene, 1,4-dimethoxy-	150-78-7	1168
Total			1775.64			1499.7			1446.67	1574	144.213	1574±144.21
27	5.089	167039	11.8779	5.089	83309.7	10.1813	5.09	175338	12.046	11.3684	0.842218	11.37±0.84	1-Hexanol	111-27-3	868
28	5.969	117005	10.864	5.969	72451.1	9.96125	5.969	126856	11.0636	10.6296	0.479596	10.63±0.48	Nonane	111-84-2	900
29	19.948	58566.1	9.6799	19.935	30553.2	9.11228	19.948	47154.7	9.44867	9.41362	0.233052	9.41±0.23	1-Cyclohexene-1-carboxylic acid, 2,6,6-trimethyl-, methyl ester	49815-58-9	1224
30	22.839	94682.4	10.4117	22.839	124502	11.016	22.839	90138.9	10.3197	10.5824	0.308834	10.58±0.31	Tridecane	629-50-5	1300
31	27.115	83745.1	10.1901	27.122	129355	11.1143	27.109	99537.7	10.5101	10.6048	0.383196	10.6±0.38	Tetradecane	629-59-4	1400
32	30.634	463406	17.8831	30.641	638192	21.4247	30.641	472866	18.0748	19.1275	1.62626	19.13±1.63	1-Pentadecene	13360-61-7	1492
33	31.19	1.35594e+06	35.9682	31.19	1.82358e+06	45.444	31.19	1.57657e+06	40.4389	40.6171	3.87051	40.62±3.87	Pentadecane	629-62-9	1500
34	37.607	267373	13.9109	37.601	450759	17.6268	37.601	309472	14.764	15.4339	1.58926	15.43±1.59	6,9-Heptadecadiene	81265-03-4	1667
35	37.873	497681	18.5776	37.872	720554	23.0936	37.873	562448	19.89	20.5204	1.89679	20.52±1.9	8-Heptadecene	2579-04-6	—
36	38.235	191890	12.3814	38.241	220228	12.9556	38.241	164935	11.8352	12.3908	0.457442	12.39±0.46	1-Heptadecene	6765-39-5	1692
37	38.726	150687	11.5465	38.726	194610	12.4365	38.726	144631	11.4238	11.8023	0.45126	11.8±0.45	Heptadecane	629-78-7	1700
Total			163.291			184.366			169.815	172.491	8.80946	172.49±8.81

## Sheet: PLD
This page displays the raw data for PLD, which is used to calculate the Average±SD results presented in Tables S2-S4.																This page shows the raw data for KF from which the Average±SD results are derived (source for Tables S2-S4)																This page shows the raw data for KF from which the Average±SD results are derived (source for Tables S2-S4)																This page shows the raw data for KF from which the Average±SD results are derived (source for Tables S2-S4)
Petal
No.	RT1	Area1	Content1（ng/g/h FW）	RT2	Area2	Content2（ng/g/h FW）	RT3	Area3	Content3（ng/g/h FW）	Average	SD	AV±SD	Compound	CAS	RI
1	6.855	609922	23.1099	6.856	862636	32.9451	6.856	959366	36.7097	30.9216	5.7335	30.92±5.73	3-Thujene	2867-05-2	929
2	7.075	2.81725e+06	109.015	7.075	3.00433e+06	116.296	7.075	4.61459e+06	178.965	134.759	31.3994	134.76±31.4	1R-α-Pinene	7785-70-8	929
3	7.586	44515	1.10523	7.58	55919.9	1.54909	7.586	89771.3	2.86653	1.84028	0.747947	1.84±0.75	Camphene	79-92-5	952
4	8.511	7.98963e+06	310.316	8.512	8.08791e+06	314.141	8.512	1.63613e+07	636.128	420.195	152.696	420.19±152.7	Sabinen	3387-41-5	974
5	8.608	1.2729e+06	48.9118	8.609	1.32308e+06	50.8647	8.609	2.0443e+06	78.9334	59.57	13.7152	59.57±13.72	β-Pinene	127-91-3	979
6	9.216	3.25547e+06	126.07	9.217	3.99876e+06	154.998	9.217	6.05975e+06	235.208	172.092	46.1659	172.09±46.17	β-Myrcene	123-35-3	991
7	9.702	82846.2	2.59702	9.708	64993.8	1.90223	9.702	89401	2.85212	2.45045	0.401398	2.45±0.4	α-Phellandrene	99-83-2	1005
8	10.206	3.48664e+06	135.067	10.206	3.98343e+06	154.401	10.206	5.41615e+06	210.16	166.543	31.8361	166.54±31.84	α-Terpinene	99-86-5	1017
10	10.704	4.59939e+06	178.373	10.704	5.12671e+06	198.896	10.711	7.89903e+06	306.789	228.019	56.3254	228.02±56.33	D-Limonene	5989-27-5	1030
11	10.788	1.03947e+07	403.916	10.788	1.06509e+07	413.887	10.795	1.47666e+07	574.062	463.955	77.9637	463.96±77.96	Eucalyptol	470-82-6	1032
12	11.597	82220	2.57264	11.597	95689.4	3.09685	11.591	145575	5.0383	3.56927	1.06058	3.57±1.06	β-cis-Ocimene	3338-55-4	1038
13	12.004	6.65611e+06	258.417	12.011	7.19177e+06	279.264	12.011	9.52596e+06	370.107	302.596	48.49	302.6±48.49	γ-Terpinene	99-85-4	1060
15	13.292	1.61948e+06	62.4001	13.292	1.80619e+06	69.6667	13.292	2.35776e+06	91.1327	74.3998	12.1982	74.4±12.2	Terpinolene	586-62-9	1088
19	17.257	5.41638e+06	210.169	17.257	5.34781e+06	207.5	17.264	7.67861e+06	298.211	238.627	42.1466	238.63±42.15	Terpinen-4-ol	562-74-3	1177
20	17.865	1.85597e+06	71.604	17.859	1.68996e+06	65.1431	17.865	2.5174e+06	97.3458	78.031	13.91	78.03±13.91	α-Terpineol	98-55-5	1189
Total			1943.64			2064.55			3124.51	2377.57	530.468	2377.57±530.47
26	30.395	382474	42.3184	30.395	361370	40.5869	30.395	315671	36.8375	39.9143	2.2876	39.91±2.29	Germacrene D	23986-74-5	1481
29	34.231	1.13743e+06	104.26	34.237	1.35698e+06	122.273	34.237	963227	89.9674	105.5	13.2179	105.5±13.22	Caryophyllene oxide	1139-30-6	1581
33	36.12	52359.8	15.2336	36.133	83493.8	17.7881	36.126	34032.9	13.7299	15.5839	1.67513	15.58±1.68	γ-Eudesmol	1209-71-8	1631
Total			161.812			180.648			140.535	160.998	16.3863	161±16.39
9	10.536	563586	75.8085	10.543	668254	78.6254	10.536	588087	76.4679	76.9672	1.20299	76.97±1.2	o-Cymene	527-84-4	1022
18	16.707	4.47485e+07	1264.95	16.688	3.13669e+07	904.814	16.707	3.74454e+07	1068.4	1079.39	147.23	1079.39±147.23	Benzene, 1,4-dimethoxy-	150-78-7	1168
Total			1340.76			983.439			1144.87	1156.36	146.101	1156.36±146.1
17	13.867	67291.6	9.8567	13.874	66752.9	9.84579	13.861	59093.3	9.69058	9.79769	0.0758681	9.8±0.08	Undecane	1120-21-4	1100
21	22.277	52699.1	9.56102	22.277	49462	9.49543	22.283	52319.2	9.55332	9.53659	0.0292762	9.54±0.03	(6E)-6-Tridecene	6434-76-0	1277
22	22.839	1.27909e+06	34.4111	22.84	1.19947e+06	32.7978	22.84	1.15862e+06	31.9701	33.0597	1.01362	33.06±1.01	Tridecane	629-50-5	1300
23	26.546	184587	12.2334	26.546	138938	11.3085	26.553	176425	12.068	11.87	0.402753	11.87±0.4	(E)-4-Tetradecene	41446-78-0	1379
24	26.779	180148	12.1435	26.779	165266	11.8419	26.779	165550	11.8477	11.9444	0.14082	11.94±0.14	1-Tetradecene	1120-36-1	1392
25	27.115	3256199	74.4729	27.115	3.8027e+06	85.5465	27.115	3.38132e+06	77.0081	79.0092	4.73704	79.01±4.74	Tetradecane	629-59-4	1400
27	30.686	3.6648e+07	751.085	30.68	2.87255e+07	590.552	30.673	2.52949e+07	521.039	620.892	96.3352	620.89±96.34	1-Pentadecene	13360-61-7	1492
28	31.313	1.06032e+08	2157.01	31.339	1.382e+08	2808.82	31.3	8.86433e+07	1804.66	2256.83	415.98	2256.83±415.98	Pentadecane	629-62-9	1500
30	34.528	357365	15.7344	34.528	294041	14.4513	34.528	253599	13.6318	14.6058	0.865312	14.61±0.87	(Z)-3-Hexadecene	34303-81-6	1587
31	34.768	378591	16.1645	34.768	321005	14.9977	34.768	253985	13.6396	14.9339	1.03176	14.93±1.03	Cetene	629-73-2	1592
32	35.046	755106	23.7937	35.052	975769	28.265	35.046	571041	20.0641	24.0409	3.35257	24.04±3.35	Hexadecane	544-76-3	1600
34	37.64	2.89456e+07	595.013	37.646	3.53602e+07	724.99	37.633	2.22067e+07	458.462	592.822	108.821	592.82±108.82	6,9-Heptadecadiene	81265-03-4	1667
36	37.911	2.31025e+07	476.614	37.918	2.75922e+07	567.588	37.905	1.71807e+07	356.622	466.941	86.3976	466.94±86.4	8-Heptadecene	2579-04-6	—
37	38.254	1.07595e+07	226.51	38.254	6.6481e+06	143.202	38.248	4.8594e+06	106.958	158.89	50.0518	158.89±50.05	1-Heptadecene	6765-39-5	1692
38	38.733	5.38856e+06	117.681	38.733	6.10787e+06	132.256	38.726	3.329e+06	75.9481	108.628	23.8621	108.63±23.86	Heptadecane	629-78-7	1700
Total			4532.28			5185.96			3523.16	4413.8	683.985	4413.8±683.99
Stamen
No.	RT1	Area1	Content1（ng/g/h FW）	RT2	Area2	Content2（ng/g/h FW）	RT3	Area3	Content3（ng/g/h FW）	Average	SD	AV±SD	Compound	CAS	RI
1	6.856	215877	7.77433	6.855	340128	12.61	6.862	298376	10.9851	10.4565	2.00922	10.46±2.01	3-Thujene	2867-05-2	929
2	7.075	877905	33.5394	7.075	1.25022e+06	48.0293	7.075	1.45647e+06	56.0561	45.8749	9.31779	45.87±9.32	1R-α-Pinene	7785-70-8	929
3	8.505	3.26623e+06	126.489	8.511	3.9952e+06	154.859	8.511	5.88306e+06	228.331	169.893	42.9145	169.89±42.91	Sabinen	3387-41-5	974
4	8.609	518428	19.5491	8.608	652735	24.7761	8.609	854911	32.6445	25.6566	5.38228	25.66±5.38	β-Pinene	127-91-3	979
5	9.217	1.09807e+06	42.1078	9.216	1.2305e+06	47.2619	9.217	2.1438e+06	82.8059	57.3919	18.0932	57.39±18.09	β-Myrcene	123-35-3	991
6	9.268	1.13191e+06	43.4248	9.268	1.64754e+06	63.4923	9.268	1.33889e+06	51.4802	52.7991	8.24543	52.8±8.25	(+)-2-Carene	—	991
7	9.695	55111.6	1.51763	9.708	53731.8	1.46393	9.702	53047.8	1.43731	1.47296	0.0334058	1.47±0.03	α-Phellandrene	99-83-2	1005
8	10.206	1.85393e+06	71.5245	10.206	2.04971e+06	79.1439	10.206	3.02343e+06	117.04	89.236	19.9047	89.24±19.9	α-Terpinene	99-86-5	1017
10	10.704	2.58247e+06	99.878	10.711	2.71465e+06	105.022	10.711	4.1505e+06	160.903	121.935	27.635	121.93±27.64	D-Limonene	5989-27-5	1030
11	10.782	7.75949e+06	301.359	10.788	6.40831e+06	248.773	10.788	1.03572e+07	402.459	317.53	63.7753	317.53±63.78	Eucalyptol	470-82-6	1032
13	12.005	4.90916e+06	190.429	12.004	4.16234e+06	161.364	12.011	7.26696e+06	282.191	211.328	51.4934	211.33±51.49	γ-Terpinene	99-85-4	1060
14	13.292	1.28072e+06	49.2161	13.298	1.0192e+06	39.0382	13.298	1.87212e+06	72.2327	53.4957	13.8854	53.5±13.89	Terpinolene	586-62-9	1088
15	13.693	242663	8.81683	13.693	378521	14.1042	13.699	251115	9.14576	10.6889	2.41868	10.69±2.42	cis-2-p-Menthen-1-ol	29803-82-5	1122
17	17.277	2.89179e+06	111.916	17.27	1.83512e+06	70.7925	17.283	3.6993e+06	143.343	108.684	29.7067	108.68±29.71	Terpinen-4-ol	562-74-3	1177
18	17.885	207037	7.4303	17.871	123338	4.1729	17.878	297036	10.9329	7.51204	2.76037	7.51±2.76	α-Terpineol	98-55-5	1189
19	18.609	296818	10.9244	18.602	1.8719e+06	72.224	18.609	104343	3.43364	28.8607	30.8146	28.86±30.81	α-Cyclogeraniol	6627-74-3	1184
Total			1125.9			1147.13			1665.42	1312.82	249.481	1312.82±249.48
26	36.133	104616	19.5211	36.119	46935.4	14.7886	36.12	135016	22.0153	18.775	2.99709	18.77±3	γ-Eudesmol	1209-71-8	1631
9	10.536	748146	80.7755	10.542	812812	82.5159	10.536	1.12656e+06	90.9597	84.7503	4.44778	84.75±4.45	o-Cymene	527-84-4	1022
16	16.804	1.41505e+08	3868.96	16.772	1.05984e+08	2912.98	16.811	1.35304e+08	3702.06	3494.67	416.917	3494.67±416.92	Benzene, 1,4-dimethoxy-	150-78-7	1168
Total			3949.73			2995.5			3793.02	3579.42	417.819	3579.42±417.82
20	22.84	130620	11.1399	22.839	154271	11.6191	22.846	165884	11.8545	11.5378	0.297318	11.54±0.3	Tridecane	629-50-5	1300
21	26.766	23770.9	8.97485	26.785	20806.8	8.91479	26.772	39213.7	9.28777	9.05914	0.163515	9.06±0.16	1-Tetradecene	1120-36-1	1392
22	26.986	279582	14.1583	26.992	202760	12.6017	26.986	635635	21.3729	16.0443	3.82113	16.04±3.82	Jasmone	488-10-8	1394
23	27.109	221340	12.9782	27.115	206767	12.6829	27.115	371415	16.0191	13.8934	1.50794	13.89±1.51	Tetradecane	629-59-4	1400
24	30.634	1.26205e+06	34.0659	30.634	883843	26.4023	30.641	2.38866e+06	56.8942	39.1208	12.9513	39.12±12.95	1-Pentadecene	13360-61-7	1492
25	31.184	3.42451e+06	77.8833	31.19	3.90139e+06	87.5462	31.191	6.29399e+06	136.027	100.486	25.4394	100.49±25.44	Pentadecane	629-62-9	1500
27	37.601	551214	19.6623	37.601	313237	14.8402	37.601	623627	21.1296	18.5441	2.68663	18.54±2.69	6,9-Heptadecadiene	81265-03-4	1667
28	37.873	1.00341e+06	28.825	37.879	798709	24.6773	37.873	1.0587e+06	29.9455	27.8159	2.26602	27.82±2.27	8-Heptadecene	2579-04-6	—
29	38.235	465541	17.9263	38.235	296775	14.5067	38.241	775110	24.1991	18.8774	4.01364	18.88±4.01	1-Heptadecene	6765-39-5	1692
30	38.733	229661	13.1468	38.726	251317	13.5856	38.726	333095	15.2426	13.9917	0.902535	13.99±0.9	Heptadecane	629-78-7	1700
Total			238.761			227.377			341.972	269.37	51.5475	269.37±51.55
Receptacle
No.	RT1	Area1	Content1（ng/g/h FW）	RT2	Area2	Content2（ng/g/h FW）	RT3	Area3	Content3（ng/g/h FW）	Average	SD	AV±SD	Compound	CAS	RI
3	7.082	308668	11.3856	7.075	642139	24.3637	7.082	556241	21.0207	18.9234	5.50194	18.92±5.5	1R-α-Pinene	7785-70-8	929
5	8.608	182211	6.46413	8.609	377794	14.0759	8.615	295129	10.8587	10.4662	3.11985	10.47±3.12	β-Pinene	127-91-3	979
6	9.223	220375	7.9494	9.217	764372	29.1208	9.223	453247	17.0124	18.0275	8.67296	18.03±8.67	β-Myrcene	123-35-3	991
7	9.268	564353	21.3364	9.268	657100	24.946	9.275	1.02431e+06	39.2372	28.5066	7.72948	28.51±7.73	(+)-2-Carene	—	991
8	9.695	67069.8	1.98302	9.702	114431	3.82625	9.708	49411.1	1.29578	2.36835	1.06839	2.37±1.07	α-Phellandrene	99-83-2	1005
9	10.206	1.34442e+06	51.6955	10.206	3.45024e+06	133.65	10.213	2.15302e+06	83.1646	89.5035	33.7568	89.5±33.76	α-Terpinene	99-86-5	1017
11	10.704	1.2102e+06	46.4719	10.704	3.07375e+06	118.998	10.711	1.9605e+06	75.6722	80.3806	29.7952	80.38±29.8	D-Limonene	5989-27-5	1030
12	10.782	6.74396e+06	261.836	10.788	1.28624e+07	499.954	10.788	9.90567e+06	384.885	382.225	97.2294	382.22±97.23	Eucalyptol	470-82-6	1032
13	12.004	3.31748e+06	128.483	12.005	8.48678e+06	329.664	12.011	5.22901e+06	202.877	220.341	83.0549	220.34±83.05	γ-Terpinene	99-85-4	1060
14	13.292	831041	31.7155	13.292	2.28339e+06	88.2384	13.298	1.33975e+06	51.5135	57.1558	23.4177	57.16±23.42	Terpinolene	586-62-9	1088
16	17.257	897433	34.2994	17.264	4.54808e+06	176.376	17.263	1.98025e+06	76.4409	95.7055	59.5808	95.71±59.58	Terpinen-4-ol	562-74-3	1177
17	17.871	90915.6	2.91106	17.872	446625	16.7547	17.878	106721	3.52618	7.73064	6.38589	7.73±6.39	α-Terpineol	98-55-5	1189
Total			606.532			1459.97			967.504	1011.33	349.79	1011.33±349.79
20	27.788	31803.6	13.547	27.795	35424.9	13.8442	27.801	49850.1	15.0277	14.1396	0.639566	14.14±0.64	Caryophyllene	87-44-5	1419
22	31.061	53111.2	15.2953	31.068	47147.2	14.8059	31.061	62220.5	16.0426	15.3813	0.508539	15.38±0.51	δ-Selinene	28624-23-9	1493
24	36.119	181636	25.8403	36.126	206480	27.8787	36.126	258158	32.1187	28.6126	2.61516	28.61±2.62	γ-Eudesmol	1209-71-8	1631
Total			54.6826			56.5288			63.1891	58.1335	3.65343	58.13±3.65
10	10.536	876872	84.2399	10.536	1.67445e+06	105.705	10.542	1.51034e+06	101.288	97.0777	9.25505	97.08±9.26	o-Cymene	527-84-4	1022
15	16.707	4.51231e+07	1275.03	16.733	6.22e+07	1734.62	16.746	6.73098e+07	1872.14	1627.26	255.314	1627.26±255.31	Benzene, 1,4-dimethoxy-	150-78-7	1168
Total			1359.27			1840.32			1973.43	1724.34	263.8	1724.34±263.8
1	5.109	39544.3	9.29447	5.115	25688.3	9.01371	5.135	21822.9	8.93538	9.08119	0.154166	9.08±0.15	1-Hexanol	111-27-3	868
18	22.839	88962.6	10.2958	22.84	139186	11.3135	22.839	116879	10.8615	10.8236	0.416325	10.82±0.42	Tridecane	629-50-5	1300
19	27.109	85180.2	10.2192	27.115	129121	11.1095	27.115	118527	10.8949	10.7412	0.379387	10.74±0.38	Tetradecane	629-59-4	1400
21	30.634	348152	15.5477	30.634	478349	18.1859	30.64	473607	18.0898	17.2745	1.22162	17.27±1.22	1-Pentadecene	13360-61-7	1492
23	31.184	1.18502e+06	32.5049	31.184	1.49195e+06	38.7242	31.184	1.33851e+06	35.6151	35.6147	2.539	35.61±2.54	Pentadecane	629-62-9	1500
25	37.607	131482	11.1574	37.601	168681	11.9111	37.601	153959	11.6128	11.5605	0.309938	11.56±0.31	6,9-Heptadecadiene	81265-03-4	1667
26	37.879	369631	15.9829	37.873	429526	17.1966	37.872	322953	15.0371	16.0722	0.883853	16.07±0.88	8-Heptadecene	2579-04-6	—
27	38.241	112249	10.7677	38.235	139948	11.3289	38.235	184792	12.2376	11.4447	0.605653	11.44±0.61	1-Heptadecene	6765-39-5	1692
28	38.733	70479	9.92129	38.72	87420.5	10.2646	38.726	108163	10.6849	10.2902	0.312258	10.29±0.31	Heptadecane	629-78-7	1700
Total			125.691			139.048			133.969	132.903	5.5047	132.9±5.5

## Sheet: LS
This page displays the raw data for LS, which is used to calculate the Average±SD results presented in Tables S2-S4.																This page shows the raw data for PLD from which the Average±SD results are derived (source for Tables S2-S4)																This page shows the raw data for PLD from which the Average±SD results are derived (source for Tables S2-S4)																This page shows the raw data for PLD from which the Average±SD results are derived (source for Tables S2-S4)
Petal
No.	RT1	Area1	Content1（ng/g/h FW）	RT2	Area2	Content2（ng/g/h FW）	RT3	Area3	Content3（ng/g/h FW）	Average	SD	AV±SD	Compound	CAS	RI
1	6.856	276173	10.121	6.856	560037	21.1685	6.855	718705	27.3436	19.5443	7.12427	19.54±7.12	3-Thujene	2867-05-2	929
2	7.076	1.03262e+06	39.5608	7.075	1.97023e+06	76.051	7.075	2.73619e+06	105.86	73.8241	27.1125	73.82±27.11	1R-α-Pinene	7785-70-8	929
3	8.512	3.62543e+06	140.468	8.511	6.0626e+06	235.319	8.511	8.78383e+06	341.225	239.004	81.9999	239±82	Sabinen	3387-41-5	974
4	8.609	485185	18.2554	8.609	862208	32.9285	8.608	1.18556e+06	45.5128	32.2322	11.1387	32.23±11.14	β-Pinene	127-91-3	979
5	9.217	1.41751e+06	54.54	9.217	2.62707e+06	101.614	9.216	3.11941e+06	120.775	92.3096	27.8292	92.31±27.83	β-Myrcene	123-35-3	991
7	10.206	1.45006e+06	55.8067	10.206	2.70459e+06	104.631	10.206	3.11693e+06	120.679	93.7053	27.5876	93.71±27.59	α-Terpinene	99-86-5	1017
9	10.704	2.03271e+06	78.4825	10.704	3.50468e+06	135.769	10.711	4.22168e+06	163.673	125.975	35.4618	125.97±35.46	D-Limonene	5989-27-5	1030
10	10.782	4.20939e+06	163.195	10.788	6.70318e+06	260.249	10.788	8.33989e+06	323.947	249.13	66.096	249.13±66.1	Eucalyptol	470-82-6	1032
12	12.005	2.68392e+06	103.826	12.005	4.77821e+06	185.332	12.011	5.67777e+06	220.342	169.834	48.8135	169.83±48.81	γ-Terpinene	99-85-4	1060
13	13.298	601063	22.7651	13.292	1.13579e+06	43.5757	13.292	1.3547e+06	52.0953	39.4787	12.3195	39.48±12.32	Terpinolene	586-62-9	1088
16	17.257	3.11588e+06	120.637	17.257	4.74087e+06	183.879	17.256	4.19736e+06	162.727	155.748	26.2858	155.75±26.29	Terpinen-4-ol	562-74-3	1177
17	17.865	1.0982e+06	42.1129	17.865	1.49351e+06	57.4976	17.865	1.69562e+06	65.3636	54.9914	9.6561	54.99±9.66	α-Terpineol	98-55-5	1189
Total			849.771			1438.01			1749.54	1345.78	373.076	1345.78±373.08
27	27.795	2.62979e+06	226.703	27.794	4.81702e+06	406.159	27.794	1.32424e+06	119.587	250.816	118.228	250.82±118.23	Caryophyllene	87-44-5	1419
28	29.185	252794	31.6786	29.185	495324	51.5774	29.185	107381	19.7479	34.3346	13.1293	34.33±13.13	Humulene	6753-98-6	1454
44	36.126	640221	63.4657	36.133	460840	48.7481	36.126	259857	32.2581	48.1573	12.7473	48.16±12.75	γ-Eudesmol	1209-71-8	1631
Total			321.848			506.484			171.593	333.308	136.959	333.31±136.96
8	10.543	330274	69.5294	10.543	442338	72.5454	10.536	427270	72.1398	71.4049	1.33645	71.4±1.34	o-Cymene	527-84-4	1022
15	16.688	3.05156e+07	881.904	16.688	3.05902e+07	883.91	16.681	2.46961e+07	725.285	830.366	74.3084	830.37±74.31	Benzene, 1,4-dimethoxy-	150-78-7	1168
Total			951.433			956.456			797.424	901.771	73.8127	901.77±73.81
14	13.868	151310	11.5591	13.868	197365	12.4924	13.867	71164.2	9.93518	11.3289	1.05659	11.33±1.06	Undecane	1120-21-4	1100
18	18.389	109109	10.704	18.389	88369.9	10.2838	18.376	42580.5	9.35599	10.1146	0.563193	10.11±0.56	Dodecane	112-40-3	1200
20	22.283	76427.9	10.0418	22.283	115416	10.8318	22.283	65240.6	9.81515	10.2296	0.43578	10.23±0.44	(6E)-6-Tridecene	6434-76-0	1277
21	22.84	1.53202e+06	39.5361	22.84	1.56472e+06	40.1988	22.839	1.54699e+06	39.8396	39.8582	0.27086	39.86±0.27	Tridecane	629-50-5	1300
22	25.86	91715.8	10.3516	25.847	45380.2	9.41272	25.893	34600.9	9.1943	9.65288	0.502061	9.65±0.5	1,3-Pentanediol, 2,2,4-trimethyl-, 1-isobutyrate	77-68-9	1380
23	26.553	225667	13.0658	26.546	293584	14.442	26.552	167354	11.8842	13.1307	1.04521	13.13±1.05	(E)-4-Tetradecene	41446-78-0	1379
24	26.779	320312	14.9836	26.779	270609	13.9765	26.779	225263	13.0576	14.0059	0.786549	14.01±0.79	1-Tetradecene	1120-36-1	1392
26	27.115	2.86729e+06	66.5925	27.115	2.54871e+06	60.1372	27.115	2.78589e+06	64.9432	63.891	2.73836	63.89±2.74	Tetradecane	629-59-4	1400
32	30.692	3.91156e+07	801.084	30.692	4.31394e+07	882.618	30.686	3.35832e+07	688.984	790.895	79.3786	790.9±79.38	1-Pentadecene	13360-61-7	1492
35	31.307	9.16463e+07	1865.5	31.3	9.03674e+07	1839.59	31.313	1.04071e+08	2117.27	1940.79	125.238	1940.79±125.24	Pentadecane	629-62-9	1500
39	34.231	978830	28.327	34.231	745176	23.5925	34.231	1.06181e+06	30.0083	27.3093	2.7163	27.31±2.72	(Z)-7-Hexadecene	35507-09-6	1566
42	34.768	422749	17.0593	34.761	258038	13.7218	34.768	304765	14.6686	15.1499	1.40439	15.15±1.4	Cetene	629-73-2	1592
43	35.052	1.17224e+06	32.246	35.052	753825	23.7678	35.052	1.15327e+06	31.8616	29.2918	3.90921	29.29±3.91	Hexadecane	544-76-3	1600
46	37.646	3.43201e+07	703.913	37.64	3.05792e+07	628.113	37.653	3.59727e+07	737.401	689.809	45.7176	689.81±45.72	6,9-Heptadecadiene	81265-03-4	1667
48	37.905	1.79122e+07	371.444	37.905	2.01094e+07	415.965	37.911	2.15411e+07	444.975	410.795	30.2408	410.79±30.24	8-Heptadecene	2579-04-6	—
49	38.248	7.52824e+06	161.036	38.254	9.76613e+06	206.382	38.248	5.98694e+06	129.805	165.741	31.4389	165.74±31.44	1-Heptadecene	6765-39-5	1692
50	38.733	6.60719e+06	142.373	38.733	5.56469e+06	121.249	38.739	7.53614e+06	161.196	141.606	16.3173	141.61±16.32	Heptadecane	629-78-7	1700
Total			4299.82			4326.77			4524.19	4383.6	100.024	4383.6±100.02
Stamen
No.	RT1	Area1	Content1（ng/g/h FW）	RT2	Area2	Content2（ng/g/h FW）	RT3	Area3	Content3（ng/g/h FW）	Average	SD	AV±SD	Compound	CAS	RI
2	6.862	120113	4.04739	6.856	183560	6.51661	6.862	100618	3.28865	4.61755	1.3781	4.62±1.38	3-Thujene	2867-05-2	929
3	7.075	527773	19.9128	7.076	776503	29.593	7.082	484760	18.2388	22.5815	5.00472	22.58±5	1R-α-Pinene	7785-70-8	929
4	8.511	1.62199e+06	62.4978	8.505	2.26544e+06	87.5398	8.512	1.33465e+06	51.3151	67.1176	15.1451	67.12±15.15	Sabinen	3387-41-5	974
5	8.608	364840	13.5717	8.609	502437	18.9268	8.615	295087	10.8571	14.4519	3.35272	14.45±3.35	β-Pinene	127-91-3	979
6	9.223	788315	30.0527	9.217	1.15279e+06	44.2376	9.236	586136	22.1842	32.1581	9.12551	32.16±9.13	β-Myrcene	123-35-3	991
7	9.268	3.17587e+06	122.972	9.268	2.51719e+06	97.3377	9.268	1.93746e+06	74.7756	98.3619	19.6896	98.36±19.69	(+)-2-Carene	—	991
10	10.206	1.74938e+06	67.4558	10.206	2.55424e+06	98.7795	10.206	1.31498e+06	50.5496	72.2617	19.9809	72.26±19.98	α-Terpinene	99-86-5	1017
13	10.704	2.35608e+06	91.0676	10.704	3.22944e+06	125.057	10.704	1.75784e+06	67.7851	94.6367	23.5171	94.64±23.52	D-Limonene	5989-27-5	1030
14	10.788	5.01435e+06	194.523	10.782	6.14422e+06	238.495	10.789	4.61392e+06	178.939	203.986	25.2177	203.99±25.22	Eucalyptol	470-82-6	1032
16	12.004	4.02124e+06	155.873	12.005	5.64607e+06	219.108	12.011	3.40479e+06	131.882	168.954	36.792	168.95±36.79	γ-Terpinene	99-85-4	1060
17	13.292	1.00497e+06	38.4846	13.292	1.40621e+06	54.0999	13.298	855506	32.6676	41.7507	9.04936	41.75±9.05	Terpinolene	586-62-9	1088
18	13.693	494922	18.6343	13.693	434177	16.2702	13.699	287445	10.5596	15.1547	3.38952	15.15±3.39	cis-2-p-Menthen-1-ol	29803-82-5	1122
20	17.27	1.62779e+06	62.7238	17.264	2.21355e+06	85.5204	17.27	1.82904e+06	70.5559	72.9334	9.45728	72.93±9.46	Terpinen-4-ol	562-74-3	1177
21	17.872	170282	5.99986	17.872	199625	7.14184	17.878	213986	7.70074	6.94748	0.707853	6.95±0.71	α-Terpineol	98-55-5	1189
22	18.609	315048	11.6339	18.603	429287	16.0799	18.609	383336	14.2916	14.0018	1.82661	14±1.83	α-Cyclogeraniol	6627-74-3	1184
Total			899.45			1144.7			745.59	929.915	164.355	929.91±164.36
33	27.814	2.05195e+07	1694.5	27.808	1.46307e+07	1211.34	27.808	1.4724e+07	1218.99	1374.94	225.98	1374.94±225.98	Caryophyllene	87-44-5	1419
34	28.17	336691	38.5621	28.163	45143.7	14.6415	28.157	641805	63.5958	38.9331	19.9872	38.93±19.99	cis-β-Farnesene	28973-97-9	1444
35	29.185	2.32598e+06	201.777	29.185	1.44383e+06	129.399	29.185	1.58921e+06	141.328	157.501	31.6842	157.5±31.68	Humulene	6753-98-6	1454
36	29.632	78200.2	17.3537	29.632	42776	14.4473	29.632	48024.1	14.8779	15.5596	1.28074	15.56±1.28	γ-Gurjunene	22567-17-5	1473
37	30.162	33287.6	13.6688	30.175	24884.5	12.9793	30.169	26481.2	13.1103	13.2528	0.298953	13.25±0.3	γ-Muurolene	30021-74-0	1477
38	30.317	474251	49.8485	30.311	245590	31.0876	30.317	295967	35.2208	38.7189	8.04863	38.72±8.05	Germacrene D	23986-74-5	1481
40	30.945	105266	19.5744	31.003	93696.8	18.6252	30.938	69686.7	16.6552	18.2849	1.21578	18.28±1.22	(+)-Bicyclogermacrene	24703-35-3	1495
43	31.65	64181.2	16.2035	31.65	32146.7	13.5752	31.643	45711.2	14.6881	14.8223	1.0772	14.82±1.08	γ-Cadinene	39029-41-9	1513
44	32.038	217253	28.7626	32.032	105541	19.5969	32.044	133004	21.8502	23.4032	3.89967	23.4±3.9	δ-Cadinene	483-76-1	1524
45	34.27	674447	66.2739	34.27	82602.2	17.7149	34.263	204857	27.7455	37.2448	20.9312	37.24±20.93	Caryophyllene oxide	1139-30-6	1581
49	36.126	301495	35.6744	36.126	309426	36.3251	36.126	179131	25.6347	32.5447	4.89331	32.54±4.89	γ-Eudesmol	1209-71-8	1631
Total			2182.2			1519.73			1593.7	1765.21	296.397	1765.21±296.4
12	10.536	800358	82.1807	10.536	1.2249e+06	93.6064	10.536	524858	74.7662	83.5178	7.74939	83.52±7.75	o-Cymene	527-84-4	1022
19	16.778	1.08265e+08	2974.37	16.753	8.47274e+07	2340.9	16.785	1.0721e+08	2945.98	2753.75	292.16	2753.75±292.16	Benzene, 1,4-dimethoxy-	150-78-7	1168
Total			3056.55			2434.5			3020.74	2837.27	285.171	2837.27±285.17
1	5.089	67718.6	9.86536	5.09	80973.3	10.1339	5.103	46217.5	9.42968	9.80966	0.290194	9.81±0.29	1-Hexanol	111-27-3	868
24	22.839	159001	11.715	22.84	128105	11.089	22.84	143035	11.3915	11.3985	0.255629	11.4±0.26	Tridecane	629-50-5	1300
29	26.785	50465.3	9.51576	26.785	29829	9.09761	26.785	40185.1	9.30745	9.30694	0.170709	9.31±0.17	1-Tetradecene	1120-36-1	1392
30	26.979	2.3628e+06	56.3701	26.984	6.31774e+06	136.508	26.986	984502	28.4419	73.7734	45.802	73.77±45.8	Jasmone	488-10-8	1394
31	27.109	298860	14.5489	27.109	303036	14.6335	27.115	221947	12.9905	14.0576	0.755398	14.06±0.76	Tetradecane	629-59-4	1400
39	30.641	2.90648e+06	67.3867	30.634	1.25914e+06	34.0069	30.641	1.09311e+06	30.6426	44.012	16.5853	44.01±16.59	1-Pentadecene	13360-61-7	1492
41	31.19	6.11135e+06	132.326	31.184	2.86593e+06	66.5649	31.191	2.74602e+06	64.1353	87.6755	31.5884	87.68±31.59	Pentadecane	629-62-9	1500
52	37.601	1.23501e+06	33.518	37.607	348161	15.5479	37.607	469738	18.0114	22.3591	7.95438	22.36±7.95	6,9-Heptadecadiene	81265-03-4	1667
53	37.879	1.72146e+06	43.3748	37.879	680451	22.281	37.879	595055	20.5507	28.7355	10.3756	28.74±10.38	8-Heptadecene	2579-04-6	—
54	38.235	1.06256e+06	30.0237	38.235	448319	17.5774	38.241	384558	16.2854	21.2955	6.19427	21.3±6.19	1-Heptadecene	6765-39-5	1692
55	38.72	593146	20.512	38.727	315981	14.8959	38.727	288297	14.3349	16.5809	2.78911	16.58±2.79	Heptadecane	629-78-7	1700
Total			429.157			352.336			235.521	339.005	79.6114	339±79.61
Receptacle
No.	RT1	Area1	Content1（ng/g/h FW）	RT2	Area2	Content2（ng/g/h FW）	RT3	Area3	Content3（ng/g/h FW）	Average	SD	AV±SD	Compound	CAS	RI
1	7.075	108558	3.59766	7.082	207850	7.46193	7.082	283914	10.4222	7.16061	2.79425	7.16±2.79	1R-α-Pinene	7785-70-8	929
2	8.511	54950.9	1.51138	8.512	138313	4.7557	8.511	296446	10.91	5.72568	3.89778	5.73±3.9	Sabinen	3387-41-5	974
3	8.615	79198.3	2.45504	8.615	141798	4.89133	8.615	152861	5.32186	4.22275	1.26225	4.22±1.26	β-Pinene	127-91-3	979
4	9.275	861277	32.8922	9.275	982092	37.5941	9.275	902644	34.5022	34.9962	1.95107	35±1.95	(+)-2-Carene	—	991
5	10.213	437047	16.3819	10.213	916676	35.0483	10.213	818387	31.223	27.5511	8.05069	27.55±8.05	α-Terpinene	99-86-5	1017
6	10.711	440087	16.5002	10.711	830840	31.7077	10.711	776673	29.5996	25.9358	6.72725	25.94±6.73	D-Limonene	5989-27-5	1030
7	10.782	4.6545e+06	180.518	10.788	8.56265e+06	332.617	10.788	4.818e+06	186.881	233.339	70.2483	233.34±70.25	Eucalyptol	470-82-6	1032
8	12.004	1.35756e+06	52.2066	12.011	2.62704e+06	101.613	12.011	2.11645e+06	81.7416	78.5203	20.2982	78.52±20.3	γ-Terpinene	99-85-4	1060
9	13.298	351316	13.0454	13.298	693486	26.3621	13.298	525285	19.816	19.7411	5.43677	19.74±5.44	Terpinolene	586-62-9	1088
10	17.257	1.40716e+06	54.1373	17.257	4.15726e+06	161.166	17.257	1.71868e+06	66.2611	93.8549	47.853	93.85±47.85	Terpinen-4-ol	562-74-3	1177
11	17.872	200283	7.16745	17.865	573542	21.6941	17.878	220732	7.96329	12.2749	6.66826	12.27±6.67	α-Terpineol	98-55-5	1189
12	18.603	115534	3.86917	18.596	305700	11.2701	18.609	81910.4	2.5606	5.89996	3.83467	5.9±3.83	α-Cyclogeraniol	6627-74-3	1184
Total			384.282			776.181			487.203	549.222	165.894	549.22±165.89
13	27.794	2.75502e+06	236.978	27.794	3.0855e+06	264.093	27.794	1.74683e+06	154.26	218.444	46.7152	218.44±46.72	Caryophyllene	87-44-5	1419
14	29.185	276970	33.6622	29.185	324911	37.5955	29.185	188110	26.3714	32.5431	4.65005	32.54±4.65	Humulene	6753-98-6	1454
15	29.444	43587.8	14.5139	29.444	43723.9	14.5251	29.457	28728.7	13.2947	14.1112	0.57736	14.11±0.58	(E)-β-Famesene	18794-84-8	1457
16	32.031	24699	12.9641	32.031	29151.3	13.3294	32.051	24780.4	12.9708	13.0881	0.17065	13.09±0.17	δ-Cadinene	483-76-1	1524
17	36.133	570491	57.7447	36.126	474571	49.8747	36.126	383232	42.3807	50	6.27295	50±6.27	γ-Eudesmol	1209-71-8	1631
Total			355.863			379.418			249.278	328.186	56.6193	328.19±56.62
18	10.213	437047	72.403	10.213	916676	85.3111	10.213	818387	82.6659	80.1267	5.56723	80.13±5.57	α-Terpinene	99-86-5	1017
19	14.411	130975	64.1657	14.411	70285.4	62.5323	14.424	84204	62.9069	63.2016	0.698608	63.2±0.7	Phenylethyl Alcohol	60-12-8	1116
20	16.694	3.83253e+07	1092.08	16.701	4.05597e+07	1152.22	16.714	4.68159e+07	1320.59	1188.3	96.7132	1188.3±96.71	Benzene, 1,4-dimethoxy-	150-78-7	1168
Total			1228.65			1300.06			1466.16	1331.63	99.4991	1331.63±99.5
21	5.083	234707	13.249	5.077	519186	19.0133	5.089	158839	11.7117	14.658	3.14298	14.66±3.14	1-Hexanol	111-27-3	868
22	19.942	165615	11.849	19.942	266412	13.8914	19.941	120344	10.9317	12.224	1.23707	12.22±1.24	1-Cyclohexene-1-carboxylic acid, 2,6,6-trimethyl-, methyl ester	49815-58-9	1224
23	22.839	103967	10.5999	22.84	167548	11.8882	22.839	131247	11.1526	11.2136	0.527719	11.21±0.53	Tridecane	629-50-5	1300
24	27.115	86554.1	10.247	27.115	134268	11.2138	27.115	57001.5	9.6482	10.3697	0.645025	10.37±0.65	Tetradecane	629-59-4	1400
25	30.641	555214	19.7434	30.641	599057	20.6318	30.64	238245	13.3207	17.8986	3.25733	17.9±3.26	1-Pentadecene	13360-61-7	1492
26	31.184	1.12653e+06	31.3199	31.184	1.26219e+06	34.0688	31.19	545043	19.5373	28.3087	6.30301	28.31±6.3	Pentadecane	629-62-9	1500
27	37.601	205328	12.6537	37.601	199335	12.5323	37.601	92979.9	10.3772	11.8544	1.0457	11.85±1.05	6,9-Heptadecadiene	81265-03-4	1667
28	37.879	394868	16.4943	37.879	401160	16.6218	37.885	173952	12.0179	15.0447	2.14087	15.04±2.14	8-Heptadecene	2579-04-6	—
29	38.235	192577	12.3953	38.235	176197	12.0634	38.241	95150.4	10.4212	11.6267	0.863087	11.63±0.86	1-Heptadecene	6765-39-5	1692
30	38.726	144897	11.4292	38.726	132556	11.1792	38.739	87276.8	10.2617	10.9567	0.50194	10.96±0.5	Heptadecane	629-78-7	1700
Total			149.981			163.104			119.38	144.155	18.3193	144.15±18.32

## Sheet: ZQ
This page displays the raw data for ZQ, which is used to calculate the Average±SD results presented in Tables S2-S4.																This page shows the raw data for LS from which the Average±SD results are derived (source for Tables S2-S4)																This page shows the raw data for LS from which the Average±SD results are derived (source for Tables S2-S4)																This page shows the raw data for LS from which the Average±SD results are derived (source for Tables S2-S4)
Petal
No.	RT1	Area1	Content1（ng/g/h FW）	RT2	Area2	Content2（ng/g/h FW）	RT3	Area3	Content3（ng/g/h FW）	Average	SD	AV±SD	Compound	CAS	RI
1	6.855	569366	21.5316	6.855	638748	24.2318	6.862	442786	16.6053	20.7895	3.15741	20.79±3.16	3-Thujene	2867-05-2	929
2	7.075	2.35709e+06	91.1068	7.075	2.56267e+06	99.1074	7.075	2.46349e+06	95.2476	95.1539	3.26692	95.15±3.27	1R-α-Pinene	7785-70-8	929
4	8.511	9.46857e+06	367.874	8.511	1.40647e+07	546.748	8.511	7.51376e+06	291.796	402.139	106.867	402.14±106.87	Sabinen	3387-41-5	974
5	8.615	1.061e+06	40.6653	8.615	1.12313e+06	43.0832	8.608	1.16885e+06	44.8625	42.8703	1.7201	42.87±1.72	β-Pinene	127-91-3	979
6	9.216	3.10652e+06	120.273	9.216	3.40572e+06	131.918	9.216	3.19484e+06	123.71	125.301	4.88498	125.3±4.88	β-Myrcene	123-35-3	991
7	9.708	52623.1	1.42078	9.702	49861.1	1.31329	9.714	48202.2	1.24873	1.3276	0.0709656	1.33±0.07	α-Phellandrene	99-83-2	1005
8	10.206	2.62827e+06	101.661	10.213	1.77798e+06	68.5687	10.206	3.03465e+06	117.476	95.902	20.3775	95.9±20.38	α-Terpinene	99-86-5	1017
10	10.711	4.24035e+06	164.4	10.711	4.09496e+06	158.742	10.711	4.27301e+06	165.671	162.938	3.01195	162.94±3.01	D-Limonene	5989-27-5	1030
11	10.788	1.0175e+07	395.368	10.788	9.06197e+06	352.049	10.788	1.10909e+07	431.012	392.81	32.2869	392.81±32.29	Eucalyptol	470-82-6	1032
12	11.597	84118.9	2.64655	11.597	83853	2.6362	11.603	112478	3.75022	3.01099	0.522735	3.01±0.52	β-cis-Ocimene	3338-55-4	1038
13	12.011	5.69419e+06	220.981	12.008	3.74726e+06	145.21	12.011	6.87563e+06	266.961	211.05	50.1981	211.05±50.2	γ-Terpinene	99-85-4	1060
15	13.292	1.6296e+06	62.7941	13.292	1.15929e+06	44.4902	13.298	1.95014e+06	75.2688	60.851	12.6402	60.85±12.64	Terpinolene	586-62-9	1088
19	17.27	1.09892e+07	427.054	17.263	9.37781e+06	364.341	17.283	1.79476e+07	697.864	496.42	144.725	496.42±144.73	Terpinen-4-ol	562-74-3	1177
20	17.872	4.4614e+06	173.003	17.871	5.17634e+06	200.827	17.884	8.6715e+06	336.853	236.894	71.5883	236.89±71.59	α-Terpineol	98-55-5	1189
Total			2190.78			2183.27			2668.33	2347.46	226.909	2347.46±226.91
27	27.794	50499.1	15.0809	27.788	66602.4	16.4022	27.794	51664.6	15.1766	15.5532	0.601559	15.55±0.6	Caryophyllene	87-44-5	1419
28	30.181	60888.2	15.9333	30.194	43504.4	14.507	30.181	99142.2	19.072	16.5041	1.90682	16.5±1.91	γ-Muurolene	30021-74-0	1477
29	30.401	461273	48.7836	30.401	370544	41.3396	30.401	980439	91.3795	60.5009	22.045	60.5±22.04	Germacrene D	23986-74-5	1481
35	36.132	65526	16.3138	36.126	119151	20.7136	36.132	198874	27.2547	21.4274	4.495	21.43±4.49	γ-Eudesmol	1209-71-8	1631
Total			96.1117			92.9624			152.883	113.986	27.5344	113.99±27.53
9	10.543	498622	74.0601	10.542	274558	68.0299	10.542	526556	74.8119	72.3006	3.03542	72.3±3.04	o-Cymene	527-84-4	1022
18	16.694	3.26087e+07	938.235	16.681	2.11937e+07	631.023	16.694	2.90106e+07	841.398	803.552	128.242	803.55±128.24	Benzene, 1,4-dimethoxy-	150-78-7	1168
Total			1012.3			699.053			916.21	875.853	131.026	875.85±131.03
17	13.867	183120	12.2037	13.867	95824.6	10.4349	13.867	60522.2	9.71954	10.786	1.04412	10.79±1.04	Undecane	1120-21-4	1100
21	18.383	107439	10.6702	18.382	40084.7	9.30542	18.389	80744.9	10.1293	10.035	0.561151	10.03±0.56	Dodecane	112-40-3	1200
22	22.283	118139	10.887	22.283	92323.5	10.3639	22.29	153417	11.6019	10.9509	0.507399	10.95±0.51	(6E)-6-Tridecene	6434-76-0	1277
23	22.839	1799163	44.9493	22.839	1.20654e+06	32.9411	22.846	1.88152e+06	46.618	41.5028	6.09223	41.5±6.09	Tridecane	629-50-5	1300
24	26.552	507589	18.7784	26.552	446059	17.5316	26.552	688148	22.437	19.5823	2.08175	19.58±2.08	(E)-4-Tetradecene	41446-78-0	1379
25	26.779	409559	16.792	26.779	313841	14.8525	26.785	521822	19.0668	16.9037	1.72229	16.9±1.72	1-Tetradecene	1120-36-1	1392
26	27.119	5126872	112.378	27.122	4.4233e+06	98.1216	27.128	6.48343e+06	139.866	116.788	17.3249	116.79±17.32	Tetradecane	629-59-4	1400
30	30.718	6.12784e+07	1250.16	30.725	7.21994e+07	1471.46	30.725	6.80381e+07	1387.14	1369.59	91.1899	1369.59±91.19	1-Pentadecene	13360-61-7	1492
31	31.365	1.64433e+08	3340.37	31.391	1.90085e+08	3860.14	31.384	1.85626e+08	3769.79	3656.77	226.744	3656.77±226.74	Pentadecane	629-62-9	1500
32	34.237	2.27876e+06	54.6673	34.237	2.30502e+06	55.1993	34.244	3.6006e+06	81.4515	63.7727	12.5027	63.77±12.5	(Z)-7-Hexadecene	35507-09-6	1566
33	34.768	614841	20.9516	34.774	691690	22.5088	34.768	1.14463e+06	31.6866	25.049	4.73635	25.05±4.74	Cetene	629-73-2	1592
34	35.052	1.31714e+06	35.1822	35.052	1.43701e+06	37.6111	35.059	2.29965e+06	55.0906	42.628	8.86803	42.63±8.87	Hexadecane	544-76-3	1600
36	37.666	4.68291e+07	957.382	37.672	5.31451e+07	1085.36	37.698	7.56518e+07	1541.41	1194.72	250.655	1194.72±250.65	6,9-Heptadecadiene	81265-03-4	1667
38	37.944	3.95458e+07	809.801	37.957	5.30856e+07	1084.16	37.963	5.3773e+07	1098.08	997.348	132.737	997.35±132.74	8-Heptadecene	2579-04-6	—
39	38.267	1.27597e+07	267.041	38.28	1.92156e+07	397.854	38.28	1.80968e+07	375.185	346.693	57.078	346.69±57.08	1-Heptadecene	6765-39-5	1692
40	38.739	6.91261e+06	148.562	38.746	8.78121e+06	186.425	38.752	1.11641e+07	234.71	189.899	35.2554	189.9±35.26	Heptadecane	629-78-7	1700
Total			7110.78			8394.26			8833.98	8113.01	731.062	8113.01±731.06
Stamen
No.	RT1	Area1	Content1（ng/g/h FW）	RT2	Area2	Content2（ng/g/h FW）	RT3	Area3	Content3（ng/g/h FW）	Average	SD	AV±SD	Compound	CAS	RI
2	6.862	340337	12.6181	6.862	336250	12.459	6.862	364239	13.5483	12.8752	0.480415	12.88±0.48	3-Thujene	2867-05-2	929
3	7.075	1.53093e+06	58.9541	7.075	1.57334e+06	60.6047	7.075	1.56179e+06	60.155	59.9046	0.696692	59.9±0.7	1R-α-Pinene	7785-70-8	929
5	8.511	5.18025e+06	200.979	8.511	5.46166e+06	211.931	8.512	5.02056e+06	194.765	202.558	7.09672	202.56±7.1	Sabinen	3387-41-5	974
6	8.608	1.01596e+06	38.9121	8.608	1.0037e+06	38.4352	8.609	1.03893e+06	39.8061	39.0512	0.568241	39.05±0.57	β-Pinene	127-91-3	979
7	9.216	2.77853e+06	107.508	9.216	2.57753e+06	99.6858	9.217	2.75512e+06	106.597	104.597	3.49275	104.6±3.49	β-Myrcene	123-35-3	991
8	9.268	1.17202e+06	44.9857	9.275	1.1708e+06	44.9382	9.268	1.11617e+06	42.8124	44.2454	1.0135	44.25±1.01	(+)-2-Carene	—	991
9	9.708	98694.3	3.2138	9.708	79179.8	2.45432	9.708	78234.3	2.41753	2.69522	0.366999	2.7±0.37	α-Phellandrene	99-83-2	1005
10	10.206	4.48634e+06	173.974	10.213	4.13502e+06	160.301	10.213	4.86556e+06	188.732	174.336	11.6098	174.34±11.61	α-Terpinene	99-86-5	1017
12	10.711	6.11468e+06	237.346	10.711	5.72642e+06	222.235	10.711	6.61082e+06	256.655	238.745	14.0865	238.75±14.09	D-Limonene	5989-27-5	1030
13	10.788	1.31644e+07	511.707	10.788	1.28299e+07	498.69	10.788	1.22456e+07	475.95	495.449	14.7767	495.45±14.78	Eucalyptol	470-82-6	1032
14	11.59	84195.7	2.64953	11.597	76800.3	2.36172	11.597	76360.7	2.34461	2.45196	0.139884	2.45±0.14	β-cis-Ocimene	3338-55-4	1038
15	12.011	1.0518e+07	408.715	12.011	9.74506e+06	378.634	12.011	1.118e+07	434.479	407.276	22.8212	407.28±22.82	γ-Terpinene	99-85-4	1060
16	13.292	2.78086e+06	107.599	13.292	2.60091e+06	100.596	13.292	2.90088e+06	112.27	106.822	4.79766	106.82±4.8	Terpinolene	586-62-9	1088
17	13.699	237997	8.63522	13.693	229748	8.31418	13.699	225755	8.15877	8.36939	0.19839	8.37±0.2	cis-2-p-Menthen-1-ol	29803-82-5	1122
19	17.276	4.06528e+06	157.587	17.283	4.31638e+06	167.359	17.27	4.58158e+06	177.68	167.542	8.20418	167.54±8.2	Terpinen-4-ol	562-74-3	1177
20	17.871	564519	21.3429	17.878	539713	20.3775	17.872	510714	19.2489	20.3231	0.855724	20.32±0.86	α-Terpineol	98-55-5	1189
21	18.609	286872	10.5374	18.615	116785	3.91784	18.616	50982.6	1.35694	5.27071	3.86805	5.27±3.87	α-Cyclogeraniol	6627-74-3	1184
Total			2107.26			2033.3			2136.98	2092.51	43.5941	2092.51±43.59
33	36.132	153081	23.4975	36.126	209897	28.159	36.126	204429	27.7104	26.4556	2.09974	26.46±2.1	γ-Eudesmol	1209-71-8	1631
Total			23.4975			28.159			27.7104
11	10.536	2.08318e+06	116.705	10.536	1.85473e+06	110.557	10.536	2.19838e+06	119.806	115.689	3.84345	115.69±3.84	o-Cymene	527-84-4	1022
18	16.785	1.12758e+08	3095.28	16.804	1.30668e+08	3577.3	16.766	8.88079e+07	2450.71	3041.1	461.52	3041.1±461.52	Benzene, 1,4-dimethoxy-	150-78-7	1168
Total			3211.99			3687.86			2570.52	3156.79	457.818	3156.79±457.82
1	5.089	89442.6	10.3055	5.089	82405.1	10.1629	5.103	36359.9	9.22994	9.89948	0.476999	9.9±0.48	1-Hexanol	111-27-3	868
22	20.323	22592.5	8.95098	20.323	21744.7	8.9338	22.29	22314.5	8.94534	8.94337	0.00715014	8.94±0.01	(6E)-6-Tridecene	6434-76-0	1277
23	22.839	158554	11.7059	22.839	131329	11.1543	22.84	220128	12.9536	11.9379	0.752664	11.94±0.75	Tridecane	629-50-5	1300
24	26.552	22014.7	8.93927	26.546	20218.9	8.90288	26.546	24051.1	8.98053	8.94089	0.0317217	8.94±0.03	(E)-4-Tetradecene	41446-78-0	1379
25	26.779	60628.9	9.7217	26.779	67610.4	9.86316	26.779	70260.5	9.91686	9.83391	0.0823167	9.83±0.08	1-Tetradecene	1120-36-1	1392
26	26.986	391916	16.4345	26.979	1.06718e+06	30.1172	26.979	1.30227e+06	34.8808	27.1442	7.81861	27.14±7.82	Jasmone	488-10-8	1394
27	27.109	320104	14.9794	27.115	340480	15.3923	27.115	407349	16.7472	15.7063	0.755095	15.71±0.76	Tetradecane	629-59-4	1400
28	30.64	3.30863e+06	75.5352	30.641	3.38086e+06	76.9988	30.641	3.3637e+06	76.6512	76.3951	0.624338	76.4±0.62	1-Pentadecene	13360-61-7	1492
29	31.197	8.54317e+06	181.602	31.19	8.3074e+06	176.824	31.197	8.17016e+06	174.043	177.49	3.12129	177.49±3.12	Pentadecane	629-62-9	1500
30	34.231	81310.7	10.1408	34.231	58597.7	9.68054	34.237	57034.6	9.64887	9.82339	0.224791	9.82±0.22	(Z)-7-Hexadecene	35507-09-6	1566
31	34.768	34942.1	9.20121	34.761	29723	9.09546	34.768	29005.5	9.08092	9.12587	0.0536096	9.13±0.05	Cetene	629-73-2	1592
32	35.052	62551.6	9.76066	35.059	47297.9	9.45158	35.059	51391.3	9.53452	9.58225	0.130618	9.58±0.13	Hexadecane	544-76-3	1600
34	37.601	1.35914e+06	36.0332	37.601	655061	21.7666	37.607	1.3938e+06	36.7354	31.5117	6.89683	31.51±6.9	6,9-Heptadecadiene	81265-03-4	1667
35	37.879	2.39e+06	56.9212	37.879	1.53243e+06	39.5445	37.879	2.62302e+06	61.643	52.7029	9.50198	52.7±9.5	8-Heptadecene	2579-04-6	—
36	38.235	1.42633e+06	37.3947	38.241	966172	28.0705	38.241	1.59563e+06	40.8252	35.4301	5.38917	35.43±5.39	1-Heptadecene	6765-39-5	1692
37	38.726	645704	21.577	38.726	412895	16.8596	38.727	648404	21.6317	20.0227	2.2368	20.02±2.24	Heptadecane	629-78-7	1700
Total			519.203			482.818			541.449	514.49	24.1665	514.49±24.17
Receptacle
No.	RT1	Area1	Content1（ng/g/h FW）	RT2	Area2	Content2（ng/g/h FW）	RT3	Area3	Content3（ng/g/h FW）	Average	SD	AV±SD	Compound	CAS	RI
4	6.862	65707.3	1.93	6.862	69548.2	2.07948	6.862	68257.9	2.02927	2.01291	0.0621111	2.01±0.06	3-Thujene	2867-05-2	929
5	7.082	327250	12.1088	7.076	355606	13.2124	7.082	338050	12.5291	12.6168	0.45477	12.62±0.45	1R-α-Pinene	7785-70-8	929
6	8.511	453458	17.0206	8.505	533054	20.1183	8.511	422349	15.8099	17.6496	1.81428	17.65±1.81	Sabinen	3387-41-5	974
7	8.608	265551	9.70758	8.609	262170	9.576	8.615	253635	9.24381	9.50913	0.195147	9.51±0.2	β-Pinene	127-91-3	979
8	9.216	435902	16.3374	9.217	392421	14.6452	9.223	334953	12.4086	14.4637	1.60903	14.46±1.61	β-Myrcene	123-35-3	991
9	9.275	688638	26.1734	9.275	726926	27.6635	9.275	676806	25.7129	26.5166	0.832478	26.52±0.83	(+)-2-Carene	—	991
11	10.213	1.63655e+06	63.0646	10.206	1.5274e+06	58.8168	10.213	1.59609e+06	61.49	61.1238	1.7534	61.12±1.75	α-Terpinene	99-86-5	1017
13	10.711	1.96997e+06	76.0407	10.711	1.8539e+06	71.5235	10.711	1.80839e+06	69.7524	72.4388	2.64753	72.44±2.65	D-Limonene	5989-27-5	1030
14	10.788	1.3866e+07	539.013	10.788	1.21298e+07	471.443	10.788	1.20465e+07	468.201	492.886	32.6437	492.89±32.64	Eucalyptol	470-82-6	1032
15	12.011	5.29484e+06	205.439	12.005	4.73708e+06	183.732	12.011	4.80866e+06	186.518	191.896	9.64353	191.9±9.64	γ-Terpinene	99-85-4	1060
16	13.298	1.44246e+06	55.5108	13.292	1.27623e+06	49.0416	13.292	1.30692e+06	50.2359	51.5961	2.81072	51.6±2.81	Terpinolene	586-62-9	1088
19	17.257	4.37671e+06	169.707	17.264	5.20308e+06	201.868	17.257	3.47885e+06	134.764	168.779	27.403	168.78±27.4	Terpinen-4-ol	562-74-3	1177
20	17.872	441805	16.5671	17.865	648694	24.6189	17.865	340735	12.6336	17.9399	4.98831	17.94±4.99	α-Terpineol	98-55-5	1189
21	18.609	113597	3.79377	18.616	89811	2.86807	18.609	46188.2	1.17035	2.61073	1.08636	2.61±1.09	α-Cyclogeraniol	6627-74-3	1184
Total			1212.41			1151.21			1062.5	1142.04	61.5448	1142.04±61.54
26	27.794	27182.5	13.1679	27.801	21081	12.6673	27.788	17829.6	12.4005	12.7452	0.318091	12.75±0.32	Caryophyllene	87-44-5	1419
29	36.132	274671	33.4736	36.126	534104	54.7592	36.132	116716	20.5138	36.2488	14.1177	36.25±14.12	γ-Eudesmol	1209-71-8	1631
Total			46.6415			67.4265			32.9143	48.9941	14.1874	48.99±14.19
12	10.543	1.39373e+06	98.1499	10.536	1.00132e+06	87.5892	10.543	1.25692e+06	94.4682	93.4024	4.37673	93.4±4.38	o-Cymene	527-84-4	1022
18	16.707	4.69433e+07	1324.02	16.733	6.54332e+07	1821.63	16.701	3.90074e+07	1110.44	1418.7	297.962	1418.7±297.96	Benzene, 1,4-dimethoxy-	150-78-7	1168
Total			1422.17			1909.22			1204.91	1512.1	294.483	1512.1±294.48
1	5.083	350988	15.6052	5.077	492156	18.4656	5.089	180619	12.153	15.408	2.58088	15.41±2.58	1-Hexanol	111-27-3	868
2	5.775	23553.2	8.97044	5.762	39451.2	9.29258	5.769	22998	8.95919	9.07407	0.154577	9.07±0.15	Butyric acid, 2-hydroxy-3-methyl-, methyl ester	17417-00-4	889
3	5.969	55389.2	9.61553	5.969	79800.7	10.1102	5.976	19722.1	8.89281	9.53951	0.499884	9.54±0.5	Nonane	111-84-2	900
22	19.941	175360	12.0465	19.942	144905	11.4294	19.935	68372.6	9.87861	11.1182	0.911974	11.12±0.91	1-Cyclohexene-1-carboxylic acid, 2,6,6-trimethyl-, methyl ester	49815-58-9	1224
23	22.839	182835	12.1979	22.84	160716	11.7498	22.839	166123	11.8593	11.9357	0.190775	11.94±0.19	Tridecane	629-50-5	1300
24	26.779	55384	9.61542	26.785	48502.2	9.47598	26.779	42167.3	9.34762	9.47967	0.109363	9.48±0.11	1-Tetradecene	1120-36-1	1392
25	27.115	261003	13.7818	27.115	212167	12.7923	27.115	200432	12.5545	13.0429	0.531463	13.04±0.53	Tetradecane	629-59-4	1400
27	30.634	1.74555e+06	43.8629	30.641	1.62656e+06	41.4519	30.641	1.26342e+06	34.0936	39.8028	4.15529	39.8±4.16	1-Pentadecene	13360-61-7	1492
28	31.19	3.24225e+06	74.1903	31.184	3.49415e+06	79.2944	31.19	2.86881e+06	66.6233	73.3693	5.2054	73.37±5.21	Pentadecane	629-62-9	1500
30	37.607	390583	16.4075	37.601	590424	20.4568	37.607	404360	16.6866	17.8503	1.8466	17.85±1.85	6,9-Heptadecadiene	81265-03-4	1667
31	37.879	833976	25.3919	37.879	1.21508e+06	33.1141	37.873	1.00554e+06	28.8683	29.1247	3.15778	29.12±3.16	8-Heptadecene	2579-04-6	—
32	38.241	345429	15.4926	38.241	490192	18.4258	38.235	481183	18.2433	17.3872	1.34181	17.39±1.34	1-Heptadecene	6765-39-5	1692
33	38.72	189824	12.3396	38.727	275257	14.0707	38.726	239447	13.345	13.2518	0.709792	13.25±0.71	Heptadecane	629-78-7	1700
Total			269.517			290.129			251.505	270.384	15.7802	270.38±15.78

## Sheet: YMY
This page displays the raw data for YMY, which is used to calculate the Average±SD results presented in Tables S2-S4.
Petal
No.	RT1	Area1	Content1（ng/g/h FW）	RT2	Area2	Content2（ng/g/h FW）	RT3	Area3	Content3（ng/g/h FW）	Average	SD	AV±SD	Compound	CAS	RI
1	6.862	597824	22.6391	6.856	599414	22.701	6.856	498972	18.7919	21.3773	1.82833	21.38±1.83	3-Thujene	2867-05-2	929
2	7.076	2.10337e+06	81.2326	7.075	2.15051e+06	83.0669	7.075	1.83353e+06	70.7306	78.3434	5.43487	78.34±5.43	1R-α-Pinene	7785-70-8	929
4	8.512	1.15209e+07	447.745	8.512	7.2849e+06	282.889	8.512	5.67067e+06	220.065	316.9	96.0107	316.9±96.01	Sabinen	3387-41-5	974
5	8.609	964106	36.8942	8.609	909064	34.752	8.609	782048	29.8088	33.8183	2.96699	33.82±2.97	β-Pinene	127-91-3	979
6	9.217	2.78495e+06	107.758	9.217	2.63449e+06	101.903	9.217	2.10332e+06	81.2304	96.9638	11.3791	96.96±11.38	β-Myrcene	123-35-3	991
8	10.206	1.81002e+06	69.8156	10.206	2.2991e+06	88.8498	10.206	2.08505e+06	80.5196	79.7283	7.7908	79.73±7.79	α-Terpinene	99-86-5	1017
10	10.704	3.92511e+06	152.131	10.704	3.46062e+06	134.054	10.704	2.97054e+06	114.981	133.722	15.1683	133.72±15.17	D-Limonene	5989-27-5	1030
11	10.788	9.36913e+06	364.004	10.788	7.87229e+06	305.749	10.788	6.99575e+06	271.635	313.796	38.136	313.8±38.14	Eucalyptol	470-82-6	1032
12	11.597	71303.5	2.14779	11.597	69022.1	2.059	11.597	53246.8	1.44506	1.88395	0.312455	1.88±0.31	β-cis-Ocimene	3338-55-4	1038
13	12.011	4.19822e+06	162.76	12.005	4.76211e+06	184.706	12.011	4.2313e+06	164.048	170.505	10.0556	170.5±10.06	γ-Terpinene	99-85-4	1060
14	13.292	1.26441e+06	48.5813	13.292	1.33279e+06	51.2426	13.292	1.11742e+06	42.8609	47.5616	3.49697	47.56±3.5	Terpinolene	586-62-9	1088
18	17.27	9.49734e+06	368.993	17.27	1.00036e+07	388.695	17.264	7.90068e+06	306.854	354.847	34.8766	354.85±34.88	Terpinen-4-ol	562-74-3	1177
19	17.865	3.3018e+06	127.873	17.865	3.18164e+06	123.197	17.865	3.02865e+06	117.243	122.771	4.35038	122.77±4.35	α-Terpineol	98-55-5	1189
			1992.58			1803.86			1520.21	1772.22	194.135	1772.22±194.13
28	27.795	1.39637e+06	125.506	27.795	2.37318e+06	205.649	27.795	2.583e+06	222.865	184.673	42.4241	184.67±42.42	Caryophyllene	87-44-5	1419
29	29.185	134032	21.9345	29.192	230691	29.8651	29.192	258702	32.1633	27.9876	4.38184	27.99±4.38	Humulene	6753-98-6	1454
30	30.181	38985.8	14.1363	30.188	45739.8	14.6905	30.181	42211.6	14.401	14.4092	0.226304	14.41±0.23	γ-Muurolene	30021-74-0	1477
31	30.395	339348	38.78	30.395	352415	39.8522	30.395	197151	27.1132	35.2485	5.76912	35.25±5.77	Germacrene D	23986-74-5	1481
43	36.126	159065	23.9884	36.126	384740	42.5044	36.133	186554	26.2438	30.9122	8.24846	30.91±8.25	γ-Eudesmol	1209-71-8	1631
			224.345			332.561			322.786	293.231	48.8729	293.23±48.87
9	10.543	334736	69.6495	10.543	287028	68.3655	10.543	255805	67.5252	68.5134	0.873504	68.51±0.87	o-Cymene	527-84-4	1022
17	16.701	4.08228e+07	1159.3	16.714	4.49966e+07	1271.63	16.701	3.9501e+07	1123.72	1184.88	63.0326	1184.88±63.03	Benzene, 1,4-dimethoxy-	150-78-7	1168
			1228.95			1339.99			1191.25	1253.4	63.1367	1253.4±63.14
16	13.868	131071	11.1491	13.868	188396	12.3106	13.868	122272	10.9708	11.4768	0.594066	11.48±0.59	Undecane	1120-21-4	1100
20	18.396	73043.2	9.97325	18.383	68476.7	9.88072	18.389	40207	9.3079	9.72062	0.294275	9.72±0.29	Dodecane	112-40-3	1200
21	22.277	85087	10.2173	22.283	111464	10.7518	22.283	100446	10.5285	10.4992	0.219178	10.5±0.22	(6E)-6-Tridecene	6434-76-0	1277
23	22.84	1.59211e+06	40.7538	22.84	2.29948e+06	55.087	22.84	1.72114e+06	43.3683	46.403	6.23257	46.4±6.23	Tridecane	629-50-5	1300
24	26.553	286866	14.3059	26.553	371314	16.017	26.553	289608	14.3615	14.8948	0.793868	14.89±0.79	(E)-4-Tetradecene	41446-78-0	1379
25	26.772	210816	12.7649	26.779	251452	13.5883	26.779	217683	12.9041	13.0858	0.359864	13.09±0.36	1-Tetradecene	1120-36-1	1392
26	26.999	45408.3	9.41329	26.992	177605	12.092	27.005	38566.2	9.27465	10.26	1.29665	10.26±1.3	Jasmone	488-10-8	1394
27	27.122	4.01015e+06	89.75	27.122	5.23179e+06	114.504	27.115	3909985	87.7204	97.3248	12.1757	97.32±12.18	Tetradecane	629-59-4	1400
33	30.692	3.97908e+07	814.766	30.712	5.8013e+07	1184	30.712	5.79376e+07	1182.47	1060.41	173.699	1060.41±173.7	1-Pentadecene	13360-61-7	1492
35	31.352	1.55233e+08	3153.95	31.391	2.02549e+08	4112.71	31.372	1.74073e+08	3535.69	3600.78	394.109	3600.78±394.11	Pentadecane	629-62-9	1500
38	34.237	1.20575e+06	32.925	34.237	1.24529e+06	33.7263	34.237	1.1082e+06	30.9484	32.5332	1.16745	32.53±1.17	(Z)-7-Hexadecene	35507-09-6	1566
41	34.768	233004	13.2145	34.774	296851	14.5082	34.768	332349	15.2275	14.3167	0.832885	14.32±0.83	Cetene	629-73-2	1592
42	35.046	849152	25.6994	35.052	1.05965e+06	29.9647	35.052	955130	27.8468	27.837	1.74133	27.84±1.74	Hexadecane	544-76-3	1600
44	37.646	3.07606e+07	631.789	37.653	3.62049e+07	742.106	37.653	3.80901e+07	780.304	718.066	62.9689	718.07±62.97	6,9-Heptadecadiene	81265-03-4	1667
46	37.924	3.33026e+07	683.297	37.931	3.39176e+07	695.758	37.924	3.54307e+07	726.419	701.825	18.1196	701.82±18.12	8-Heptadecene	2579-04-6	—
47	38.254	7.42386e+06	158.921	38.261	1.24945e+07	261.667	38.267	1.73743e+07	360.546	260.378	82.318	260.38±82.32	1-Heptadecene	6765-39-5	1692
48	38.733	5.76337e+06	125.275	38.739	7.54279e+06	161.331	38.739	8.14371e+06	173.508	153.371	20.4794	153.37±20.48	Heptadecane	629-78-7	1700
			5838.16			7480			7031.4	6783.19	692.874	6783.19±692.87
Stamen
No.	RT1	Area1	Content1（ng/g/h FW）	RT2	Area2	Content2（ng/g/h FW）	RT3	Area3	Content3（ng/g/h FW）	Average	SD	AV±SD	Compound	CAS	RI
2	6.862	188525	6.70986	6.862	120115	4.04745	6.862	115108	3.85257	4.86996	1.30344	4.87±1.3	3-Thujene	2867-05-2	929
3	7.076	1.12375e+06	43.1072	7.076	821195	31.3323	7.075	708295	26.9384	33.7927	6.8263	33.79±6.83	1R-α-Pinene	7785-70-8	929
4	8.512	3.65375e+06	141.571	8.512	1.8475e+06	71.2745	8.511	1.75084e+06	67.5126	93.4525	34.0592	93.45±34.06	Sabinen	3387-41-5	974
5	8.609	780881	29.7633	8.609	612268	23.2012	8.609	526660	19.8695	24.278	4.11029	24.28±4.11	β-Pinene	127-91-3	979
6	9.217	2.20381e+06	85.1411	9.217	1.51736e+06	58.4257	9.217	1.29615e+06	49.8167	64.4612	15.0394	64.46±15.04	β-Myrcene	123-35-3	991
7	9.268	793531	30.2557	9.268	777502	29.6318	9.268	808869	30.8526	30.2467	0.498421	30.25±0.5	(+)-2-Carene	—	991
9	10.206	3.39856e+06	131.639	10.206	2.79919e+06	108.312	10.206	2.44822e+06	94.6535	111.535	15.2703	111.53±15.27	α-Terpinene	99-86-5	1017
12	10.711	4.60389e+06	178.548	10.704	3.75927e+06	145.677	10.711	3.28986e+06	127.409	150.545	21.1595	150.54±21.16	D-Limonene	5989-27-5	1030
13	10.788	1.15528e+07	448.988	10.789	8.98143e+06	348.915	10.788	8.37384e+06	325.268	374.39	53.6247	374.39±53.62	Eucalyptol	470-82-6	1032
14	11.597	78000.8	2.40844	11.597	63589.6	1.84758	11.603	43702.5	1.07361	1.77654	0.547253	1.78±0.55	β-cis-Ocimene	3338-55-4	1038
15	12.011	8.63266e+06	335.341	12.011	7.36353e+06	285.949	12.011	6.20493e+06	240.858	287.383	38.5859	287.38±38.59	γ-Terpinene	99-85-4	1060
16	13.298	2.28259e+06	88.2073	13.292	1.94136e+06	74.9272	13.298	1.56955e+06	60.4569	74.5305	11.3325	74.53±11.33	Terpinolene	586-62-9	1088
17	13.699	135808	4.65818	13.699	211187	7.59181	13.693	156353	5.45777	5.90259	1.23826	5.9±1.24	cis-2-p-Menthen-1-ol	29803-82-5	1122
19	17.296	5.30217e+06	205.724	17.296	4.48303e+06	173.845	17.289	3.18875e+06	123.473	167.681	33.8605	167.68±33.86	Terpinen-4-ol	562-74-3	1177
20	17.878	620357	23.516	17.878	342525	12.7033	17.885	290646	10.6843	15.6345	5.63369	15.63±5.63	α-Terpineol	98-55-5	1189
21	18.616	160886	5.6342	18.609	1.64233e+06	63.2894	18.609	1.23819e+06	47.5612	38.8282	24.3342	38.83±24.33	α-Cyclogeraniol	6627-74-3	1184
			1761.21			1440.97			1235.74	1479.31	216.23	1479.31±216.23
25	25.919	102192	19.3222	25.996	72271.3	16.8673	25.99	57382.1	15.6457	17.2784	1.52882	17.28±1.53	Copaene	3856-25-5	1376
29	27.814	1.75527e+07	1451.08	27.82	2.35902e+07	1946.44	27.807	1.60546e+07	1328.17	1575.23	267.239	1575.23±267.24	Caryophyllene	87-44-5	1419
30	28.15	110938	20.0398	28.157	434522	46.5888	28.157	69021.9	16.6007	27.7431	13.3997	27.74±13.4	cis-β-Farnesene	28973-97-9	1444
31	29.185	2.00575e+06	175.503	29.185	2.66374e+06	229.489	29.185	1.79824e+06	158.477	187.823	30.271	187.82±30.27	Humulene	6753-98-6	1454
32	29.638	69565.1	16.6452	29.638	82203.1	17.6822	29.638	57773.9	15.6778	16.6684	0.818432	16.67±0.82	γ-Gurjunene	22567-17-5	1473
33	30.175	26606.7	13.1206	30.169	42279.8	14.4066	30.162	24781.9	12.9709	13.4994	0.644388	13.5±0.64	γ-Muurolene	30021-74-0	1477
34	30.317	418467	45.2716	30.317	538925	55.1547	30.317	337126	38.5978	46.3414	6.80154	46.34±6.8	Germacrene D	23986-74-5	1481
36	30.938	82880.4	17.7377	30.945	100104	19.1509	30.945	67053.4	16.4392	17.7759	1.10738	17.78±1.11	(+)-Bicyclogermacrene	24703-35-3	1495
38	31.436	99513.2	19.1024	31.391	84990.2	17.9108	31.391	38831.8	14.1237	17.0456	2.12263	17.05±2.12	δ-Guaiene	3691-11-0	1505
39	31.656	59509.2	15.8202	31.65	66489.3	16.3929	31.65	45605.4	14.6794	15.6308	0.712216	15.63±0.71	γ-Cadinene	39029-41-9	1513
40	32.044	183260	25.9736	32.044	231572	29.9374	32.044	156738	23.7975	26.5695	2.54177	26.57±2.54	δ-Cadinene	483-76-1	1524
41	34.276	834446	79.4013	34.27	613466	61.2706	34.27	377899	41.9431	60.8717	15.2948	60.87±15.29	Caryophyllene oxide	1139-30-6	1581
43	36.126	547516	55.8596	36.12	326075	37.691	36.126	455206	48.2858	47.2788	7.45138	47.28±7.45	γ-Eudesmol	1209-71-8	1631
44	36.475	64488.5	16.2287	36.475	47400.5	14.8267	36.475	30045.4	13.4028	14.8194	1.1537	14.82±1.15	α-epi-Cadinol	5937-11-1	1640
45	36.611	70192.3	16.6967	36.605	38546.8	14.1003	36.611	52773	15.2675	15.3548	1.06178	15.35±1.06	α-Eudesmol	473-16-5	1653
46	36.98	26753.6	13.1327	36.974	50259.2	15.0613	36.986	40839.9	14.2884	14.1608	0.792487	14.16±0.79	α-Cadinol	481-34-5	1653
			2000.93			2552.97			1788.37	2114.09	322.241	2114.09±322.24
11	10.543	1.2442e+06	94.1256	10.536	1.03679e+06	88.5438	10.536	1.02752e+06	88.2943	90.3212	2.69205	90.32±2.69	o-Cymene	527-84-4	1022
18	16.843	1.85431e+08	5051.12	16.856	203817623	5545.96	16.837	1.80667e+08	4922.9	5173.32	268.64	5173.32±268.64	Benzene, 1,4-dimethoxy-	150-78-7	1168
			5145.24			5634.5			5011.19	5263.65	267.883	5263.65±267.88
1	5.103	30096.8	9.10303	5.096	67018.8	9.85118	5.096	94365.1	10.4053	9.7865	0.533606	9.79±0.53	1-Hexanol	111-27-3	868
22	19.942	21047.4	8.91967	19.948	26332.7	9.02676	19.935	29610.1	9.09317	9.0132	0.0714792	9.01±0.07	1-Cyclohexene-1-carboxylic acid, 2,6,6-trimethyl-, methyl ester	49815-58-9	1224
23	22.84	287004	14.3087	22.84	263062	13.8236	22.84	151001	11.5529	13.2284	1.20119	13.23±1.2	Tridecane	629-50-5	1300
24	24.942	49635.6	9.49894	24.929	60282.4	9.71468	24.955	28510.6	9.07089	9.42817	0.267546	9.43±0.27	2,2,4-Trimethyl-1,3-pentanediol diisobutyrate	6846-50-0	1588
26	26.785	98401.2	10.4871	26.792	54053.6	9.58847	26.785	39077.9	9.28502	9.78685	0.510394	9.79±0.51	1-Tetradecene	1120-36-1	1392
27	26.986	1.08925e+06	30.5645	26.986	1.01367e+06	29.0331	26.979	1.07121e+06	30.1989	29.9321	0.65303	29.93±0.65	Jasmone	488-10-8	1394
28	27.122	503815	18.7019	27.122	280390	14.1747	27.115	224084	13.0338	15.3034	2.44779	15.3±2.45	Tetradecane	629-59-4	1400
35	30.641	3.88768e+06	87.2685	30.641	2.06521e+06	50.34	30.634	1.58826e+06	40.6757	59.4281	20.0776	59.43±20.08	1-Pentadecene	13360-61-7	1492
37	31.204	1.1989e+07	251.424	31.191	6.52329e+06	140.673	31.191	4.81643e+06	106.087	166.062	61.9898	166.06±61.99	Pentadecane	629-62-9	1500
42	35.052	58775.9	9.68415	35.046	29953.5	9.10013	35.046	20536.5	8.90932	9.2312	0.329624	9.23±0.33	Hexadecane	544-76-3	1600
47	37.601	1.12864e+06	31.3625	37.601	706758	22.8141	37.607	328604	15.1516	23.1094	6.62136	23.11±6.62	6,9-Heptadecadiene	81265-03-4	1667
48	37.879	2.41557e+06	57.4393	37.879	1.46404e+06	38.1587	37.873	877110	26.2659	40.6213	12.8451	40.62±12.85	8-Heptadecene	2579-04-6	—
49	38.235	1.17606e+06	32.3235	38.235	862911	25.9782	38.235	613421	20.9228	26.4082	4.66423	26.41±4.66	1-Heptadecene	6765-39-5	1692
50	38.727	694951	22.5748	38.727	539711	19.4293	38.726	342238	15.4279	19.144	2.9247	19.14±2.92	Heptadecane	629-78-7	1700
			593.661			401.706			326.081	440.482	112.628	440.48±112.63
Receptacle
No.	RT1	Area1	Content1（ng/g/h FW）	RT2	Area2	Content2（ng/g/h FW）	RT3	Area3	Content3（ng/g/h FW）	Average	SD	AV±SD	Compound	CAS	RI
4	7.082	217503	7.83761	7.076	254696	9.28511	7.076	165434	5.81118	7.64464	1.42478	7.64±1.42	1R-α-Pinene	7785-70-8	929
5	8.511	422442	15.8135	8.512	95908.1	3.10536	8.518	59689.9	1.69581	6.87157	6.34905	6.87±6.35	Sabinen	3387-41-5	974
6	8.615	198927	7.11468	8.609	205867	7.38476	8.615	139458	4.80027	6.43323	1.15993	6.43±1.16	β-Pinene	127-91-3	979
7	9.223	316493	11.6902	9.223	261041	9.53205	9.236	178387	6.3153	9.17917	2.20842	9.18±2.21	β-Myrcene	123-35-3	991
8	9.275	299670	11.0354	9.268	847180	32.3436	9.275	714712	27.1882	23.5224	9.077	23.52±9.08	(+)-2-Carene	—	991
10	9.702	22524.5	0.249397	9.708	48211	1.24907	9.715	33153.9	0.663074	0.720515	0.410132	0.72±0.41	α-Phellandrene	99-83-2	1005
11	10.213	1.2822e+06	49.2739	10.213	1.83246e+06	70.6889	10.213	1.17323e+06	45.0328	54.9986	11.2291	55±11.23	α-Terpinene	99-86-5	1017
13	10.711	1.50288e+06	57.8622	10.711	1.88577e+06	72.7639	10.711	1.23925e+06	47.6021	59.4094	10.3304	59.41±10.33	D-Limonene	5989-27-5	1030
14	10.788	1.30664e+07	507.896	10.789	1.085e+07	421.638	10.789	8.53248e+06	331.443	420.326	72.0428	420.33±72.04	Eucalyptol	470-82-6	1032
15	12.011	4.19611e+06	162.678	12.011	5.12609e+06	198.872	12.011	3460614	134.054	165.201	26.5217	165.2±26.52	γ-Terpinene	99-85-4	1060
16	13.298	1.14398e+06	43.8945	13.292	1.34337e+06	51.6545	13.298	890710	34.0377	43.1956	7.20898	43.2±7.21	Terpinolene	586-62-9	1088
21	17.264	4.59714e+06	178.286	17.264	4.51878e+06	175.236	17.257	2.98089e+06	115.384	156.302	28.9602	156.3±28.96	Terpinen-4-ol	562-74-3	1177
22	17.872	305057	11.2451	17.872	289308	10.6322	17.872	211653	7.60997	9.82908	1.58897	9.83±1.59	α-Terpineol	98-55-5	1189
23	18.616	122902	4.15594	18.603	261032	9.53169	18.616	141657	4.88582	6.19115	2.38084	6.19±2.38	α-Cyclogeraniol	6627-74-3	1184
			1069.03			1073.92			766.523	969.824	143.77	969.82±143.77
27	27.794	2.14765e+06	187.145	27.795	2.10232e+06	183.427	27.795	1.38685e+06	124.725	165.099	28.5892	165.1±28.59	Caryophyllene	87-44-5	1419
28	29.179	223997	29.3159	29.185	230368	29.8386	29.185	140731	22.4842	27.2129	3.35051	27.21±3.35	Humulene	6753-98-6	1454
29	29.457	40359.3	14.249	29.444	35201.6	13.8258	29.451	36688.3	13.9478	14.0075	0.177849	14.01±0.18	(E)-β-Famesene	18794-84-8	1457
30	31.074	40029	14.2219	31.068	44633.5	14.5997	31.061	55290.5	15.4741	14.7652	0.524421	14.77±0.52	δ-Selinene	28624-23-9	1493
34	36.126	226099	29.4884	36.126	53571.4	15.333	36.126	168090	24.7289	23.1834	5.88133	23.18±5.88	γ-Eudesmol	1209-71-8	1631
			274.421			257.024			201.36	244.268	31.1609	244.27±31.16
12	10.543	950674	86.2261	10.536	1.31461e+06	96.0207	10.543	898206	84.814	89.0203	4.9835	89.02±4.98	o-Cymene	527-84-4	1022
20	16.733	6.61992e+07	1842.25	16.72	5.65458e+07	1582.45	16.714	5.10566e+07	1434.72	1619.81	168.458	1619.81±168.46	Benzene, 1,4-dimethoxy-	150-78-7	1168
			1928.48			1678.47			1519.53	1708.83	168.324	1708.83±168.32
1	5.083	335960	15.3007	5.077	514153	18.9114	5.077	400195	16.6023	16.9381	1.49306	16.94±1.49	1-Hexanol	111-27-3	868
2	5.969	80308.7	10.1205	5.969	35588.6	9.21431	5.969	20450	8.90756	9.41412	0.514927	9.41±0.51	Nonane	111-84-2	900
24	22.846	211366	12.7761	22.846	196980	12.4846	22.846	136478	11.2586	12.1731	0.657484	12.17±0.66	Tridecane	629-50-5	1300
25	27.012	31863.5	9.13883	26.999	89058	10.2978	27.012	35923.2	9.22109	9.55256	0.528	9.55±0.53	Jasmone	488-10-8	1394
26	27.115	161100	11.7575	27.115	130486	11.1372	27.115	93410.1	10.3859	11.0936	0.5608	11.09±0.56	Tetradecane	629-59-4	1400
31	30.641	1.09307e+06	30.6418	30.641	553217	19.7029	30.641	389449	16.3845	22.2431	6.09134	22.24±6.09	1-Pentadecene	13360-61-7	1492
33	31.191	4.18496e+06	93.2922	31.191	1688870	42.7144	31.191	1.13548e+06	31.5011	55.8359	26.8783	55.84±26.88	Pentadecane	629-62-9	1500
35	37.607	702426	22.7263	37.608	102342	10.5669	37.601	63218.2	9.77417	14.3558	5.92768	14.36±5.93	6,9-Heptadecadiene	81265-03-4	1667
36	37.879	1.4527e+06	37.929	37.879	337186	15.3255	37.873	216670	12.8835	22.046	11.2751	22.05±11.28	8-Heptadecene	2579-04-6	—
37	38.235	449795	17.6073	38.241	152728	11.5879	38.235	106593	10.6531	13.2828	3.08164	13.28±3.08	1-Heptadecene	6765-39-5	1692
38	38.726	332720	15.235	38.733	107656	10.6746	38.727	77251.5	10.0585	11.9894	2.30875	11.99±2.31	Heptadecane	629-78-7	1700
			276.525			172.617			147.63	198.924	55.8122	198.92±55.81

## Sheet: Total Content
The data on the total content of various types of volatile components in different Antique Lotus flowers are presented below.
	ZNH								KF								PLD
Petal	Content1	Content2	Content3	AV	SD			Petal	Content1	Content2	Content3	AV	SD			Petal	Content1	Content2	Content3	AV	SD
MTs	520.53	277.354	798.651	532.178	212.978	532.18±212.98		MTs	1419.06	966.572	791.908	1059.18	264.278	1059.18±264.28		MTs	1943.64	2064.55	3124.51	2377.57	530.468	2377.57±530.47
STs	856.891	619.027	953.533	809.817	140.56	809.82±140.56		STs	679.762	978.302	253.735	637.266	297.326	637.27±297.33		STs	161.812	180.648	140.535	160.998	16.3863	161±16.39
BPs	1072.62	839.472	836.158	916.082	110.695	916.08±110.7		BPs	1154.38	1323.77	1563.24	1347.13	167.732	1347.13±167.73		BPs	1340.76	983.439	1144.87	1156.36	146.101	1156.36±146.1
FADs	6293.81	6878.79	9013.98	7395.53	1169.07	7395.53±1169.07		FADs	6352.53	5363.63	4231.81	5315.99	866.437	5315.99±866.44		FADs	4532.28	5185.96	3523.16	4413.8	683.985	4413.8±683.99
Total	8743.85	8614.65	11602.3	9653.61	1378.96	9653.61±1378.96		Total	9605.74	8632.28	6840.69	8359.57	1145.18	8359.57±1145.18		Total	7978.5	8414.6	7933.07	8108.72	217.079	8108.72±217.08
Stamen	Content1	Content2	Content3	AV	SD			Stamen	Content1	Content2	Content3	AV	SD			Stamen	Content1	Content2	Content3	AV	SD
MTs	486.77	577.41	381.138	481.773	80.2057	481.77±80.21		MTs	670.14	1484.01	870.801	1008.32	346.199	1008.32±346.2		MTs	1125.9	1147.13	1665.42	1312.82	249.481	1312.82±249.48
STs	3899.17	4593.57	3543.55	4012.1	436.043	4012.1±436.04		STs	4213.02	2570.79	4924.05	3902.62	985.467	3902.62±985.47		STs	19.5211	14.7886	22.0153	18.775	2.99709	18.77±3
BPs	2611.96	2857.84	2571.22	2680.34	126.608	2680.34±126.61		BPs	3837.02	3177.83	4188.94	3734.6	419.087	3734.6±419.09		BPs	3949.73	2995.5	3793.02	3579.42	417.819	3579.42±417.82
FADs	311.613	384.92	295.582	330.705	38.8903	330.7±38.89		FADs	385.426	421.978	436.628	414.677	21.5313	414.68±21.53		FADs	238.761	227.377	341.972	269.37	51.5475	269.37±51.55
Total	7309.51	8413.74	6791.49	7504.91	676.541	7504.91±676.54		Total	9105.61	7654.62	10420.4	9060.21	1129.59	9060.21±1129.59		Total	5333.91	4384.79	5822.43	5180.38	596.87	5180.38±596.87
Receptacle	Content1	Content2	Content3	AV	SD			Receptacle	Content1	Content2	Content3	AV	SD			Receptacle	Content1	Content2	Content3	AV	SD
MTs	192.743	319.107	181.107	230.986	62.4918	230.99±62.49		MTs	315.912	756.024	395.073	489.003	191.558	489±191.56		MTs	606.532	1459.97	967.504	1011.33	349.79	1011.33±349.79
STs	394.106	642.114	513.569	516.597	101.271	516.6±101.27		STs	813.127	698.086	651.031	720.748	68.0879	720.75±68.09		STs	54.6826	56.5288	63.1891	58.1335	3.65343	58.13±3.65
BPs	929.496	1242	1081.97	1084.49	127.593	1084.49±127.59		BPs	1713.57	1438.02	1384.94	1512.18	144.046	1512.18±144.05		BPs	1359.27	1840.32	1973.43	1724.34	263.8	1724.34±263.8
FADs	142.581	180.994	137.823	153.799	19.3273	153.8±19.33		FADs	163.291	184.366	169.815	172.491	8.80946	172.49±8.81		FADs	125.691	139.048	133.969	132.903	5.5047	132.9±5.5
Total	1658.93	2384.22	1914.47	1985.87	300.373	1985.87±300.37		Total	3005.9	3076.5	2600.86	2894.42	209.568	2894.42±209.57		Total	2146.18	3495.87	3138.09	2926.71	570.922	2926.71±570.92
	LS								ZQ								YMY
Petal	Content1	Content2	Content3	AV	SD			Petal	Content1	Content2	Content3	AV	SD			Petal	Content1	Content2	Content3	AV	SD
MTs	849.771	1438.01	1749.54	1345.78	373.076	1345.78±373.08		MTs	2190.78	2183.27	2668.33	2347.46	226.909	2347.46±226.91		MTs	1992.58	1803.86	1520.21	1772.22	194.135	1772.22±194.13
STs	321.848	506.484	171.593	333.308	136.959	333.31±136.96		STs	96.1117	92.9624	152.883	113.986	27.5344	113.99±27.53		STs	224.345	332.561	322.786	293.231	48.8729	293.23±48.87
BPs	951.433	956.456	797.424	901.771	73.8127	901.77±73.81		BPs	1012.3	699.053	916.21	875.853	131.026	875.85±131.03		BPs	1228.95	1339.99	1191.25	1253.4	63.1367	1253.4±63.14
FADs	4289.47	4317.36	4515	4373.94	100.389	4373.94±100.39		FADs	7110.78	8394.26	8833.98	8113.01	731.062	8113.01±731.06		FADs	5838.16	7480	7031.4	6783.19	692.874	6783.19±692.87
Total	6412.52	7218.32	7233.56	6954.8	383.498	6954.8±383.5		Total	10410	11369.5	12571.4	11450.3	884.246	11450.3±884.25		Total	9284.03	10956.4	10065.6	10102	683.232	10102.03±683.23
Stamen	Content1	Content2	Content3	AV	SD			Stamen	Content1	Content2	Content3	AV	SD			Stamen	Content1	Content2	Content3	AV	SD
MTs	899.45	1144.7	745.59	929.915	164.355	929.91±164.36		MTs	2107.26	2033.3	2136.98	2092.51	43.5941	2092.51±43.59		MTs	1761.21	1440.97	1235.74	1479.31	216.23	1479.31±216.23
STs	2182.2	1519.73	1593.7	1765.21	296.397	1765.21±296.4		STs	23.4975	28.159	27.7104	26.4556	2.09974	26.46±2.1		STs	2000.93	2552.97	1788.37	2114.09	322.241	2114.09±322.24
BPs	3056.55	2434.5	3020.74	2837.27	285.171	2837.27±285.17		BPs	3211.99	3687.86	2570.52	3156.79	457.818	3156.79±457.82		BPs	5145.24	5634.5	5011.19	5263.65	267.883	5263.65±267.88
FADs	429.157	352.336	235.521	339.005	79.6114	339±79.61		FADs	519.203	482.818	541.449	514.49	24.1665	514.49±24.17		FADs	584.162	391.991	317.01	431.054	112.508	431.05±112.51
Total	6567.36	5451.28	5595.55	5871.4	495.631	5871.4±495.63		Total	5861.95	6232.13	5276.65	5790.25	393.353	5790.25±393.35		Total	9491.55	10020.4	8352.31	9288.1	696.039	9288.1±696.04
Receptacle	Content1	Content2	Content3	AV	SD			Receptacle	Content1	Content2	Content3	AV	SD			Receptacle	Content1	Content2	Content3	AV	SD
MTs	384.282	776.181	487.203	549.222	165.894	549.22±165.89		MTs	1212.41	1151.21	1062.5	1142.04	61.5448	1142.04±61.54		MTs	1068.78	1072.67	765.86	969.104	143.724	969.1±143.72
STs	355.863	379.418	249.278	328.186	56.6193	328.19±56.62		STs	46.6415	67.4265	32.9143	48.9941	14.1874	48.99±14.19		STs	274.421	257.024	201.36	244.268	31.1609	244.27±31.16
BPs	1164.49	1237.53	1403.26	1268.42	99.8954	1268.42±99.9		BPs	1422.17	1909.22	1204.91	1512.1	294.483	1512.1±294.48		BPs	1928.48	1678.47	1519.53	1708.83	168.324	1708.83±168.32
FADs	159.319	172.361	128.445	153.375	18.4147	153.38±18.41		FADs	269.517	290.129	251.505	270.384	15.7802	270.38±15.78		FADs	276.525	172.617	147.63	198.924	55.8122	198.92±55.81
Total	2063.95	2565.49	2268.18	2299.21	205.924	2299.21±205.92		Total	2950.74	3417.99	2551.83	2973.52	353.974	2973.52±353.97		Total	3548.21	3180.78	2634.38	3121.12	375.444	3121.12±375.44

## Sheet: Significance analysis
	All significance analyses were conducted using IBM SPSS 27, from which the results were derived.
The significance analysis results for Fig. 5a, expressed in units of ng/g/h FW (nanograms per gram fresh weight per hour), are presented below. These results were derived from statistical analyses performed using IBM SPSS 27.										The significance analysis results for Table 1, expressed in units of ng/g/h FW (nanograms per gram fresh weight per hour), are presented below. These results were derived from statistical analyses performed using IBM SPSS 27.
	No.	Petal	No.	Stamen	No.	Receptacle				No.	ZNH	KF	PLD	LS	ZQ	YMY
	1	8743.85	1	7309.51	1	1658.93				1	8743.85	9605.74	7978.5	6412.52	10410	9284.03	P
	1	8614.65	1	8413.74	1	2384.22				1	8614.65	8632.28	8414.6	7218.32	11369.5	10956.4	P
	1	11602.3	1	6791.49	1	1914.47				1	11602.3	6840.69	7933.07	7233.56	12571.4	10065.6	P
	2	9605.74	2	9105.61	2	3005.9				2	7309.51	9105.61	5333.91	6567.36	5861.95	9491.55	S
	2	8632.28	2	7654.62	2	3076.5				2	8413.74	7654.62	4384.79	5451.28	6232.13	10020.4	S
	2	6840.69	2	10420.4	2	2600.86				2	6791.49	10420.4	5822.43	5595.55	5276.65	8352.31	S
	3	7978.5	3	5333.91	3	2146.18				3	1658.93	3005.9	2146.18	2063.95	2950.74	3548.21	R
	3	8414.6	3	4384.79	3	3495.87				3	2384.22	3076.5	3495.87	2565.49	3417.99	3180.78	R
	3	7933.07	3	5822.43	3	3138.09				3	1914.47	2600.86	3138.09	2268.18	2551.83	2634.38	R
	4	6412.52	4	6567.36	4	2063.95
	4	7218.32	4	5451.28	4	2565.49
	4	7233.56	4	5595.55	4	2268.18				Table 1. The total volatile components in in floral organs (µg/g/h FW).
	5	10410	5	5861.95	5	2950.74					Petal	Stamen	Receptacle
	5	11369.5	5	6232.13	5	3417.99				ZNH	9.65±1.38a	7.50±0.68a	1.99±0.30b
	5	12571.4	5	5276.65	5	2551.83				KF	8.36±1.15a	9.06±1.13a	2.89±0.21b
	6	9284.03	6	9491.55	6	3548.21				PLD	8.11±0.22a	5.18±0.60b	2.93±0.57c
	6	10956.4	6	10020.4	6	3180.78				LS	6.95±0.38a	5.87±0.50b	2.30±0.21c
	6	10065.6	6	8352.31	6	2634.38				ZQ	11.45±0.88a	5.79±0.39b	2.97±0.35c
										YMY	10.10±0.68a	9.29±0.70a	3.12±0.38b
	Petal
	VAR00001		N	Subset of Alpha = 0.05						ZNH
				1	2	3	4			VAR00001		N	Subset of Alpha = 0.05
	Turkey Ba	4.00	3	6954.8									1	2
		3.00	3	8108.72	8108.72					Turkey Ba	3.00	3	1985.87
		2.00	3	8359.57	8359.57						2.00	3		7504.91
		1.00	3	9653.61	9653.61	9653.61					1.00	3		9653.61
		6.00	3		10102	10102				Waller-Duncana,b	3.00	3	1985.87
		5.00	3			11450.3					2.00	3		7504.91
	Waller-Duncana,b	4.00	3	6954.8							1.00	3		9653.61
		3.00	3	8108.72	8108.72					The average of each group in the chi-subset will be shown.
		2.00	3	8359.57	8359.57	8359.57				a. Sample size using the harmonic mean = 3.000。
		1.00	3		9653.61	9653.61	9653.61			b. Category I/II error severity ratio = 100。
		6.00	3			10102	10102
		5.00	3				11450.3
	The average of each group in the chi-subset will be shown.
	a. Sample size using the harmonic mean = 3.000。									KF
	b. Category I/II error severity ratio = 100。									VAR00001		N	Subset of Alpha = 0.05
													1	2
										Turkey Ba	3.00	3	2894.42
											1.00	3		8359.57
	Stamen										2.00	3		9060.22
	VAR00001		N	Subset of Alpha = 0.05						Waller-Duncana,b	3.00	3	2894.42
				1	2	3					1.00	3		8359.57
	Turkey Ba,b	3.00	3	5180.38							2.00	3		9060.22
		5.00	3	5790.24	5790.24					The average of each group in the chi-subset will be shown.
		4.00	3	5871.4	5871.4					a. Sample size using the harmonic mean = 3.000。
		1.00	4		7814.65	7814.65				b. Category I/II error severity ratio = 100。
		2.00	3			9060.22
		6.00	2			9755.99
	Waller-Duncana,b,c	3.00	3	5180.38
		5.00	3	5790.24						PLD
		4.00	3	5871.4						VAR00001		N	Subset of Alpha = 0.05
		1.00	4		7814.65								1	2	3
		2.00	3		9060.22	9060.22				Turkey Ba	3.00	3	2926.71
		6.00	2			9755.99					2.00	3		5180.38
	The average of each group in the chi-subset will be shown.										1.00	3			8108.72
	a. Sample size using the harmonic mean = 2.880。									Waller-Duncana,b	3.00	3	2926.71
	b. Group sizes are not equal.A reconciled average of group sizes was used.Type I error level cannot be guaranteed.										2.00	3		5180.38
	c. Category I/II error severity ratio = 100。										1.00	3			8108.72
										The average of each group in the chi-subset will be shown.
										a. Sample size using the harmonic mean = 3.000。
										b. Category I/II error severity ratio = 100。
	Receptacle
	VAR00001		N	Subset of Alpha = 0.05
				1	2					LS
	Turkey Ba	1.00	3	1985.87						VAR00001		N	Subset of Alpha = 0.05
		4.00	3	2299.21									1	2	3
		2.00	3	2894.42						Turkey Ba	3.00	3	2299.21
		3.00	3	2926.71							2.00	3		5871.4
		5.00	3	2973.52							1.00	3			6954.8
		6.00	3	3121.12						Waller-Duncana,b	3.00	3	2299.21
	Waller-Duncana,b	1.00	3	1985.87							2.00	3		5871.4
		4.00	3	2299.21	2299.21						1.00	3			6954.8
		2.00	3		2894.42					The average of each group in the chi-subset will be shown.
		3.00	3		2926.71					a. Sample size using the harmonic mean = 3.000。
		5.00	3		2973.52					b. Category I/II error severity ratio = 100。
		6.00	3		3121.12
	The average of each group in the chi-subset will be shown.
	a. Sample size using the harmonic mean = 3.000。									ZQ
	b. Category I/II error severity ratio = 100。									VAR00001		N	Subset of Alpha = 0.05
													1	2	3
										Turkey Ba	3.00	3	2973.52
											2.00	3		5790.24
											1.00	3			11450.3
										Waller-Duncana,b	3.00	3	2973.52
											2.00	3		5790.24
											1.00	3			11450.3
										The average of each group in the chi-subset will be shown.
										a. Sample size using the harmonic mean = 3.000。
										b. Category I/II error severity ratio = 100。
										YMY
										VAR00001		N	Subset of Alpha = 0.05
													1	2
										Turkey Ba	3.00	3	3121.12
											2.00	3		9288.1
											1.00	3		10102
										Waller-Duncana,b	3.00	3	3121.12
											2.00	3		9288.1
											1.00	3		10102
										The average of each group in the chi-subset will be shown.
										a. Sample size using the harmonic mean = 3.000。
										b. Category I/II error severity ratio = 100。

## Sheet: Relative quantification
Relative quantification of different compound types was carried out using primary volatile compound standards.
	α-Pinene
	Content（X）	Area（Y）
	1.10237	4.25685e+07
	0.275593	1.03827e+07
	0.0688984	2.63802e+06
	0.0344492	1.37695e+06
	0.00430615	302911
	0.00107654	110494
	0.000269134	44329.1
	caryophyllene
	Content（X）	Area（Y）
	3.6183	6.60763e+07
	2.00454	3.64123e+07
	0.0565359	717692
	0.00706698	79354.5
	0.000244694	13034.7
	1,4-dimethoxybenzene
	Content（X）	Area（Y）
	7.23659	4.01787e+08
	0.904574	4.41008e+07
	0.452287	2.06142e+07
	0.226143	8.27409e+06
	0.0282679	1.0131e+06
	0.014134	490828
	0.00706698	141723
	0.00353349	70590.3
	Pentadecane
	Content（X）	Area（Y）
	4	2.95811e+08
	1	73303794
	0.25	1.73244e+07
	0.0625	4.35887e+06
	0.015625	857498
	0.00390625	119601
	9.76563e-05	14143.6
