# Supplementary material for: Untargeted metabolites profiling of volatile components of Chinese Antique Lotus (Nelumbo nucifera Gaertn.) using solid-phase microextraction (SPME) GC/MS
Source: PeerJ. 2025 Jun 19;13:e19600. doi: 10.7717/peerj.19600 (PMC12182725; doi:10.7717/peerj.19600)
Supplement: Supplemental Information 13 — These tables were compiled using data extracted and analyzed from the original files, which include results from GC-MS and other relevant analytical methods. For further details or access to specific raw data files, please refer to the supplementary materials or contact the corresponding author. [file peerj-13-19600-s013.xlsx]

## Sheet: Fig. 2a
This page contains the raw data for Fig. 2a, sourced from Table S2.
Type	Total	ZNH-Petal	ZNH-Stamen	ZNH-Receptacle	KF-Petal	KF-Stamen	KF-Receptacle	PLD-Petal	PLD-Stamen	PLD-Receptacle	LS-Petal	LS-Stamen	LS-Receptacle	ZQ-Petal	ZQ-Stamen	ZQ-Receptacle	YMY-Petal	YMY-Stamen	YMY-Receptacle
MTs	18	12	15	10	12	14	13	15	16	12	12	15	12	14	17	14	13	16	13
STs	20	4	16	7	4	12	10	3	1	3	3	11	5	4	1	2	5	16	5
BPs	2	2	2	2	2	2	2	2	2	2	2	2	2	2	2	2	2	2	2
FADs	24	14	13	9	12	10	11	15	10	9	16	11	11	16	16	13	17	13	11
Total	64	32	46	28	30	38	36	35	29	26	33	39	30	36	36	31	37	47	31

## Sheet: Fig. 2b
The Excel source file from Qualitative Analysis B.07.00 is in '.csv' format. As a result, the data presented on this page has been copied from the raw data extracted by GC-MS. If you require the CSV format of the extracted data, please feel free to contact me via email.
Retention Time (RT)	Receptacle	RT	Stamen	RT	Petal
5.0054	5262	5.0054	3831	5.0054	3513
5.01187	4293	5.01187	3703	5.01187	3028
5.01833	4148	5.01833	3585	5.01833	2958
5.0248	3525	5.0248	3840	5.0248	3219
5.03127	4234	5.03127	3608	5.03127	3202
5.03775	4397	5.03775	3286	5.03775	3330
5.04422	4685	5.04422	3827	5.04422	3000
5.05068	7414	5.05068	3773	5.05068	3089
5.05715	22071	5.05715	3654	5.05715	3557
5.06362	61246	5.06362	4920	5.06362	3269
5.07008	107320	5.07008	8418	5.07008	3468
5.07655	137302	5.07655	16227	5.07655	3623
5.08302	137739	5.08302	25266	5.08302	3603
5.0895	114725	5.0895	31245	5.0895	3651
5.09597	90115	5.09597	29624	5.09597	3386
5.10243	70296	5.10243	26396	5.10243	3208
5.1089	55312	5.1089	23066	5.1089	3392
5.11537	43927	5.11537	19319	5.11537	3718
5.12183	36409	5.12183	17702	5.12183	4486
5.1283	32556	5.1283	16564	5.1283	4886
5.13477	30077	5.13477	14320	5.13477	5409
5.14125	26297	5.14125	12454	5.14125	5397
5.14772	21316	5.14772	11442	5.14772	4939
5.15418	21062	5.15418	11262	5.15418	5158
5.16065	16800	5.16065	9080	5.16065	4776
5.16712	16838	5.16712	8742	5.16712	3739
5.17358	13206	5.17358	7850	5.17358	3678
5.18005	13734	5.18005	6990	5.18005	3512
5.18652	12249	5.18652	6898	5.18652	3275
5.19298	10955	5.19298	6323	5.19298	3762
5.19947	10854	5.19947	6106	5.19947	3060
5.20593	11315	5.20593	6347	5.20593	3402
5.2124	9304	5.2124	6412	5.2124	2966
5.21887	9078	5.21887	5859	5.21887	3170
5.22533	8872	5.22533	4859	5.22533	3822
5.2318	9016	5.2318	6026	5.2318	3422
5.23827	8026	5.23827	5773	5.23827	2989
5.24473	8334	5.24473	5887	5.24473	3572
5.25122	8376	5.25122	5368	5.25122	3133
5.25768	7060	5.25768	4916	5.25768	3212
5.26415	7662	5.26415	5198	5.26415	3848
5.27062	7128	5.27062	4871	5.27062	3268
5.27708	7173	5.27708	4671	5.27708	3502
5.28355	6482	5.28355	5248	5.28355	3103
5.29002	7234	5.29002	5065	5.29002	3561
5.29648	6813	5.29648	5457	5.29648	3040
5.30295	7047	5.30295	7738	5.30295	3171
5.30943	8230	5.30943	8909	5.30943	3515
5.3159	7675	5.3159	9777	5.3159	2919
5.32237	8170	5.32237	10684	5.32237	3316
5.32883	7428	5.32883	10214	5.32883	3327
5.3353	6849	5.3353	8435	5.3353	3055
5.34177	6822	5.34177	7210	5.34177	3055
5.34823	6966	5.34823	6434	5.34823	2963
5.3547	6272	5.3547	6387	5.3547	3422
5.36118	6280	5.36118	5465	5.36118	3281
5.36765	6472	5.36765	5366	5.36765	3662
5.37412	5981	5.37412	5827	5.37412	3427
5.38058	5987	5.38058	6372	5.38058	3215
5.38705	6083	5.38705	7022	5.38705	3575
5.39352	6796	5.39352	6637	5.39352	2664
5.39998	6504	5.39998	6809	5.39998	3328
5.40645	5741	5.40645	5772	5.40645	3323
5.41292	6620	5.41292	5415	5.41292	2892
5.4194	6406	5.4194	4688	5.4194	3196
5.42587	5569	5.42587	4956	5.42587	3258
5.43233	5720	5.43233	3450	5.43233	3227
5.4388	5692	5.4388	4656	5.4388	3413
5.44527	5812	5.44527	3542	5.44527	3210
5.45173	6364	5.45173	4027	5.45173	2778
5.4582	5609	5.4582	4577	5.4582	3365
5.46467	5624	5.46467	4351	5.46467	2867
5.47115	5254	5.47115	3806	5.47115	2880
5.47762	5678	5.47762	4680	5.47762	3615
5.48408	5239	5.48408	4549	5.48408	3309
5.49055	5545	5.49055	3732	5.49055	3404
5.49702	4404	5.49702	3972	5.49702	3289
5.50348	5067	5.50348	4106	5.50348	3291
5.50995	5040	5.50995	3870	5.50995	3442
5.51642	4811	5.51642	4306	5.51642	2909
5.52288	5634	5.52288	4248	5.52288	3137
5.52937	5016	5.52937	4166	5.52937	3482
5.53583	5364	5.53583	4315	5.53583	3423
5.5423	5000	5.5423	4141	5.5423	2953
5.54877	4951	5.54877	4583	5.54877	3097
5.55523	4403	5.55523	4159	5.55523	3129
5.5617	4889	5.5617	4135	5.5617	3334
5.56817	5032	5.56817	3403	5.56817	2819
5.57463	4831	5.57463	4068	5.57463	3137
5.58112	4861	5.58112	3696	5.58112	3246
5.58758	4618	5.58758	3468	5.58758	3180
5.59405	5656	5.59405	3918	5.59405	3474
5.60052	4770	5.60052	4071	5.60052	3419
5.60698	4195	5.60698	3382	5.60698	3463
5.61345	4494	5.61345	3768	5.61345	3336
5.61992	4502	5.61992	3782	5.61992	3441
5.62638	4912	5.62638	3733	5.62638	3072
5.63285	5225	5.63285	3657	5.63285	3490
5.63933	3679	5.63933	4331	5.63933	3340
5.6458	4163	5.6458	4485	5.6458	3556
5.65227	4005	5.65227	3939	5.65227	3170
5.65873	3956	5.65873	4119	5.65873	3115
5.6652	4435	5.6652	3566	5.6652	3130
5.67167	4957	5.67167	3228	5.67167	3444
5.67813	4169	5.67813	3926	5.67813	3271
5.6846	5185	5.6846	3999	5.6846	2956
5.69108	4142	5.69108	3914	5.69108	3520
5.69755	5037	5.69755	4319	5.69755	3814
5.70402	4889	5.70402	3447	5.70402	3399
5.71048	6185	5.71048	3808	5.71048	3375
5.71695	6746	5.71695	4877	5.71695	3390
5.72342	7086	5.72342	3810	5.72342	3402
5.72988	7295	5.72988	3948	5.72988	3067
5.73635	7258	5.73635	5033	5.73635	3593
5.74283	8313	5.74283	4471	5.74283	3553
5.7493	7984	5.7493	5582	5.7493	3291
5.75577	9599	5.75577	5502	5.75577	2929
5.76223	9956	5.76223	5434	5.76223	3377
5.7687	10705	5.7687	6834	5.7687	3757
5.77517	11323	5.77517	7671	5.77517	3991
5.78163	10285	5.78163	6696	5.78163	4034
5.7881	9322	5.7881	6327	5.7881	3741
5.79457	8394	5.79457	6399	5.79457	3969
5.80105	7457	5.80105	5505	5.80105	4552
5.80752	6917	5.80752	5750	5.80752	4412
5.81398	5966	5.81398	4266	5.81398	3271
5.82045	5042	5.82045	4395	5.82045	3699
5.82692	5196	5.82692	3838	5.82692	2742
5.83338	5025	5.83338	3772	5.83338	2918
5.83985	5573	5.83985	4431	5.83985	3517
5.84632	4732	5.84632	5223	5.84632	2810
5.8528	4685	5.8528	3905	5.8528	3141
5.85927	5005	5.85927	3524	5.85927	3582
5.86573	4592	5.86573	4187	5.86573	3200
5.8722	4061	5.8722	3327	5.8722	3294
5.87867	4453	5.87867	3699	5.87867	3238
5.88513	4536	5.88513	4219	5.88513	3531
5.8916	4298	5.8916	4608	5.8916	3127
5.89807	4171	5.89807	3916	5.89807	3794
5.90453	3730	5.90453	4112	5.90453	3614
5.91102	4754	5.91102	3802	5.91102	3585
5.91748	4042	5.91748	3655	5.91748	3298
5.92395	4198	5.92395	3668	5.92395	3561
5.93042	5161	5.93042	3282	5.93042	3250
5.93688	5775	5.93688	4052	5.93688	3409
5.94335	8989	5.94335	4242	5.94335	3811
5.94982	12519	5.94982	5567	5.94982	5270
5.95628	17805	5.95628	6283	5.95628	7232
5.96277	22557	5.96277	6560	5.96277	8650
5.96923	24836	5.96923	7741	5.96923	8951
5.9757	21779	5.9757	6152	5.9757	9016
5.98217	19900	5.98217	5763	5.98217	7426
5.98863	14838	5.98863	4137	5.98863	5164
5.9951	11411	5.9951	4468	5.9951	4311
6.00157	9002	6.00157	3806	6.00157	3489
6.00803	7929	6.00803	3995	6.00803	3625
6.0145	7954	6.0145	4019	6.0145	3278
6.02098	7538	6.02098	3780	6.02098	3003
6.02745	6971	6.02745	3894	6.02745	3723
6.03392	6984	6.03392	4246	6.03392	3573
6.04038	6661	6.04038	3493	6.04038	2893
6.04685	5397	6.04685	3901	6.04685	3533
6.05332	5130	6.05332	3171	6.05332	2940
6.05978	4621	6.05978	3617	6.05978	2942
6.06625	4936	6.06625	3763	6.06625	3503
6.07273	4672	6.07273	3444	6.07273	3210
6.0792	4882	6.0792	4488	6.0792	3345
6.08567	4007	6.08567	3630	6.08567	3025
6.09213	4818	6.09213	3516	6.09213	2824
6.0986	4360	6.0986	3272	6.0986	3269
6.10507	4730	6.10507	3430	6.10507	3381
6.11153	4399	6.11153	3028	6.11153	3559
6.118	4261	6.118	3157	6.118	3585
6.12447	4082	6.12447	3911	6.12447	3244
6.13095	4350	6.13095	4025	6.13095	2834
6.13742	4320	6.13742	3862	6.13742	3094
6.14388	3939	6.14388	3913	6.14388	3596
6.15035	4018	6.15035	3460	6.15035	3569
6.15682	4433	6.15682	4214	6.15682	3331
6.16328	4572	6.16328	3731	6.16328	3560
6.16975	4251	6.16975	3597	6.16975	3186
6.17622	4111	6.17622	3768	6.17622	3258
6.1827	4360	6.1827	3800	6.1827	3858
6.18917	3813	6.18917	3805	6.18917	3217
6.19563	4304	6.19563	3637	6.19563	3083
6.2021	3805	6.2021	2861	6.2021	2988
6.20857	3995	6.20857	3772	6.20857	3049
6.21503	3547	6.21503	3472	6.21503	3252
6.2215	4402	6.2215	3813	6.2215	3268
6.22797	4550	6.22797	3676	6.22797	3338
6.23443	3953	6.23443	3980	6.23443	3197
6.24092	3616	6.24092	3762	6.24092	3085
6.24738	4221	6.24738	3582	6.24738	3305
6.25385	4566	6.25385	3913	6.25385	3637
6.26032	3670	6.26032	3994	6.26032	2990
6.26678	4177	6.26678	2965	6.26678	2716
6.27325	3898	6.27325	3510	6.27325	3032
6.27972	3790	6.27972	3347	6.27972	2932
6.28618	3541	6.28618	2832	6.28618	3394
6.29267	4138	6.29267	3900	6.29267	2767
6.29913	4005	6.29913	3249	6.29913	3235
6.3056	3185	6.3056	3691	6.3056	2960
6.31207	3797	6.31207	3710	6.31207	3180
6.31853	4051	6.31853	3541	6.31853	3102
6.325	3535	6.325	3869	6.325	3652
6.33147	3566	6.33147	3729	6.33147	2937
6.33793	3730	6.33793	3454	6.33793	2775
6.34442	3642	6.34442	3870	6.34442	3154
6.35088	4167	6.35088	3597	6.35088	3348
6.35735	3612	6.35735	3810	6.35735	3094
6.36382	3660	6.36382	3850	6.36382	3289
6.37028	4153	6.37028	3641	6.37028	3215
6.37675	3607	6.37675	2876	6.37675	3124
6.38322	3475	6.38322	4040	6.38322	3078
6.38968	4148	6.38968	4183	6.38968	3342
6.39615	3324	6.39615	3808	6.39615	3020
6.40263	3661	6.40263	3028	6.40263	3341
6.4091	3250	6.4091	3614	6.4091	3592
6.41557	3603	6.41557	3524	6.41557	3338
6.42203	3183	6.42203	3248	6.42203	3592
6.4285	4075	6.4285	3698	6.4285	3626
6.43497	3214	6.43497	3271	6.43497	3535
6.44143	3528	6.44143	4026	6.44143	3808
6.4479	3312	6.4479	2920	6.4479	2975
6.45438	4115	6.45438	3540	6.45438	2544
6.46085	3195	6.46085	3116	6.46085	3430
6.46732	3361	6.46732	2702	6.46732	2798
6.47378	3537	6.47378	3293	6.47378	3503
6.48025	3065	6.48025	2940	6.48025	2828
6.48672	3502	6.48672	3274	6.48672	3224
6.49318	3353	6.49318	3126	6.49318	2841
6.49965	3253	6.49965	2999	6.49965	3196
6.50612	3012	6.50612	3498	6.50612	2512
6.5126	3272	6.5126	2996	6.5126	2993
6.51907	3166	6.51907	3096	6.51907	2756
6.52553	2957	6.52553	3075	6.52553	2813
6.532	3014	6.532	3338	6.532	2926
6.53847	3386	6.53847	2968	6.53847	2796
6.54493	3696	6.54493	2866	6.54493	2940
6.5514	3041	6.5514	2875	6.5514	3113
6.55787	3530	6.55787	2881	6.55787	3058
6.56435	3723	6.56435	3052	6.56435	3016
6.57082	4095	6.57082	3220	6.57082	2620
6.57728	3898	6.57728	2879	6.57728	2771
6.58375	4417	6.58375	3019	6.58375	3116
6.59022	3696	6.59022	2678	6.59022	2822
6.59668	3032	6.59668	2772	6.59668	2994
6.60315	3932	6.60315	3001	6.60315	3586
6.60962	3995	6.60962	2826	6.60962	3052
6.61608	3666	6.61608	2913	6.61608	3206
6.62257	3546	6.62257	3307	6.62257	2982
6.62903	3635	6.62903	3641	6.62903	2722
6.6355	3319	6.6355	3034	6.6355	2711
6.64197	3747	6.64197	3017	6.64197	2383
6.64843	3817	6.64843	3466	6.64843	2804
6.6549	3743	6.6549	3231	6.6549	3069
6.66137	3896	6.66137	2869	6.66137	2645
6.66783	3935	6.66783	3123	6.66783	2793
6.67432	3762	6.67432	3017	6.67432	2971
6.68078	3265	6.68078	3805	6.68078	2651
6.68725	3220	6.68725	3670	6.68725	2663
6.69372	3365	6.69372	3283	6.69372	3280
6.70018	3666	6.70018	3316	6.70018	2909
6.70665	3788	6.70665	3070	6.70665	2794
6.71312	4122	6.71312	3284	6.71312	3082
6.71958	3635	6.71958	3003	6.71958	3179
6.72605	3371	6.72605	3638	6.72605	2624
6.73253	3572	6.73253	2879	6.73253	3288
6.739	4080	6.739	3332	6.739	2780
6.74547	3565	6.74547	2687	6.74547	3092
6.75193	3703	6.75193	2913	6.75193	2842
6.7584	3563	6.7584	3207	6.7584	2904
6.76487	4108	6.76487	3221	6.76487	3102
6.77133	3456	6.77133	3049	6.77133	3460
6.7778	4291	6.7778	3382	6.7778	2829
6.78428	3742	6.78428	3427	6.78428	3081
6.79075	3295	6.79075	3340	6.79075	3471
6.79722	3775	6.79722	3143	6.79722	2785
6.80368	3721	6.80368	2967	6.80368	2839
6.81015	3556	6.81015	3596	6.81015	4705
6.81662	3984	6.81662	5937	6.81662	9762
6.82308	5735	6.82308	12731	6.82308	22687
6.82955	7443	6.82955	26758	6.82955	46916
6.83602	11199	6.83602	49282	6.83602	87983
6.8425	18218	6.8425	81931	6.8425	148845
6.84897	22895	6.84897	115422	6.84897	196400
6.85543	28495	6.85543	138663	6.85543	230561
6.8619	29111	6.8619	143004	6.8619	229485
6.86837	25479	6.86837	124167	6.86837	196275
6.87483	22681	6.87483	94712	6.87483	141710
6.8813	15382	6.8813	59882	6.8813	93634
6.88777	11581	6.88777	35124	6.88777	52645
6.89425	6951	6.89425	19514	6.89425	28204
6.90072	5353	6.90072	10674	6.90072	14290
6.90718	4637	6.90718	5745	6.90718	6740
6.91365	4390	6.91365	4691	6.91365	5578
6.92012	3993	6.92012	4077	6.92012	3903
6.92658	3871	6.92658	3463	6.92658	3504
6.93305	3991	6.93305	3245	6.93305	3433
6.93952	3677	6.93952	3428	6.93952	3104
6.946	3411	6.946	3333	6.946	3678
6.95247	3805	6.95247	3806	6.95247	2986
6.95893	4032	6.95893	3168	6.95893	2888
6.9654	3249	6.9654	3262	6.9654	3059
6.97187	3158	6.97187	2800	6.97187	3001
6.97833	3838	6.97833	2782	6.97833	3479
6.9848	3879	6.9848	3528	6.9848	3170
6.99127	2914	6.99127	3341	6.99127	3265
6.99773	3608	6.99773	3452	6.99773	2927
7.00422	3231	7.00422	3181	7.00422	2731
7.01068	3583	7.01068	3055	7.01068	2604
7.01715	2993	7.01715	3573	7.01715	3399
7.02362	2758	7.02362	4722	7.02362	5010
7.03008	4612	7.03008	9572	7.03008	15166
7.03655	7773	7.03655	24140	7.03655	39359
7.04302	16137	7.04302	60365	7.04302	100156
7.04948	29912	7.04948	132456	7.04948	215955
7.05597	53426	7.05597	249851	7.05597	404271
7.06243	83083	7.06243	394569	7.06243	634866
7.0689	111978	7.0689	530555	7.0689	844013
7.07537	130567	7.07537	616660	7.07537	938669
7.08183	131509	7.08183	602573	7.08183	904013
7.0883	115089	7.0883	506986	7.0883	754066
7.09477	84695	7.09477	367704	7.09477	544859
7.10123	58251	7.10123	235892	7.10123	346559
7.1077	34887	7.1077	134042	7.1077	201368
7.11418	20281	7.11418	69209	7.11418	96495
7.12065	10976	7.12065	33722	7.12065	43618
7.12712	6438	7.12712	17072	7.12712	21247
7.13358	4323	7.13358	7922	7.13358	10794
7.14005	3472	7.14005	5061	7.14005	5654
7.14652	3613	7.14652	3654	7.14652	4730
7.15298	3104	7.15298	3448	7.15298	4129
7.15945	2992	7.15945	3916	7.15945	3743
7.16593	3140	7.16593	3797	7.16593	2708
7.1724	2688	7.1724	3611	7.1724	3603
7.17887	3081	7.17887	3481	7.17887	3695
7.18533	3315	7.18533	3601	7.18533	3486
7.1918	3216	7.1918	3398	7.1918	3417
7.19827	3292	7.19827	3228	7.19827	2877
7.20473	2998	7.20473	3262	7.20473	3053
7.2112	3372	7.2112	3965	7.2112	2579
7.21767	3442	7.21767	4232	7.21767	2907
7.22415	3131	7.22415	5094	7.22415	2661
7.23062	3311	7.23062	5031	7.23062	2860
7.23708	3296	7.23708	5720	7.23708	2813
7.24355	3445	7.24355	6202	7.24355	2940
7.25002	2890	7.25002	5088	7.25002	3339
7.25648	3988	7.25648	4924	7.25648	2998
7.26295	3295	7.26295	4526	7.26295	3018
7.26942	3299	7.26942	3471	7.26942	2908
7.2759	3451	7.2759	4002	7.2759	2559
7.28237	3937	7.28237	3239	7.28237	3037
7.28883	3098	7.28883	2757	7.28883	3181
7.2953	3418	7.2953	3075	7.2953	3307
7.30177	3932	7.30177	3323	7.30177	3070
7.30823	4178	7.30823	3261	7.30823	3012
7.3147	4496	7.3147	3442	7.3147	2526
7.32117	4431	7.32117	3461	7.32117	3046
7.32763	4553	7.32763	3258	7.32763	2944
7.33412	4018	7.33412	3417	7.33412	2688
7.34058	3638	7.34058	2657	7.34058	2780
7.34705	4371	7.34705	3100	7.34705	3102
7.35352	3517	7.35352	2649	7.35352	3071
7.35998	3565	7.35998	3481	7.35998	3330
7.36645	3978	7.36645	3218	7.36645	2738
7.37292	3779	7.37292	3706	7.37292	2974
7.37938	3836	7.37938	2792	7.37938	3009
7.38587	4109	7.38587	3351	7.38587	3132
7.39233	3393	7.39233	3272	7.39233	2423
7.3988	3072	7.3988	3122	7.3988	2407
7.40527	3436	7.40527	2759	7.40527	2817
7.41173	4218	7.41173	3043	7.41173	3287
7.4182	3586	7.4182	3459	7.4182	2891
7.42467	2884	7.42467	3092	7.42467	2931
7.43113	3494	7.43113	3670	7.43113	2792
7.4376	3450	7.4376	3150	7.4376	3222
7.44408	3396	7.44408	3541	7.44408	3193
7.45055	4897	7.45055	3028	7.45055	2738
7.45702	4885	7.45702	2936	7.45702	3055
7.46348	6254	7.46348	4237	7.46348	3015
7.46995	6520	7.46995	3943	7.46995	3202
7.47642	6751	7.47642	4195	7.47642	2800
7.48288	6924	7.48288	4690	7.48288	2792
7.48935	5899	7.48935	5262	7.48935	2978
7.49583	5668	7.49583	4607	7.49583	2773
7.5023	4829	7.5023	3808	7.5023	3420
7.50877	5189	7.50877	4633	7.50877	4684
7.51523	5418	7.51523	3645	7.51523	5246
7.5217	5208	7.5217	4684	7.5217	5605
7.52817	4734	7.52817	6317	7.52817	5601
7.53463	4409	7.53463	5541	7.53463	6197
7.5411	4092	7.5411	5587	7.5411	6199
7.54757	4279	7.54757	5610	7.54757	5872
7.55405	3896	7.55405	5433	7.55405	6405
7.56052	3813	7.56052	6195	7.56052	7654
7.56698	3827	7.56698	9537	7.56698	9323
7.57345	5079	7.57345	9675	7.57345	11791
7.57992	5093	7.57992	13386	7.57992	15235
7.58638	5552	7.58638	14164	7.58638	16344
7.59285	5758	7.59285	15033	7.59285	16085
7.59932	4442	7.59932	12133	7.59932	13107
7.6058	4690	7.6058	8636	7.6058	10152
7.61227	3154	7.61227	6985	7.61227	6487
7.61873	3228	7.61873	5244	7.61873	5081
7.6252	3100	7.6252	3331	7.6252	4352
7.63167	3608	7.63167	3224	7.63167	2741
7.63813	3119	7.63813	2950	7.63813	2524
7.6446	3457	7.6446	3417	7.6446	3266
7.65107	3216	7.65107	3697	7.65107	3029
7.65755	2952	7.65755	3557	7.65755	3168
7.66402	3312	7.66402	3111	7.66402	3049
7.67048	3182	7.67048	2836	7.67048	2802
7.67695	3006	7.67695	3601	7.67695	2739
7.68342	3335	7.68342	3476	7.68342	2736
7.68988	2964	7.68988	3518	7.68988	2795
7.69635	3084	7.69635	3360	7.69635	2329
7.70282	3199	7.70282	3319	7.70282	3099
7.70928	3709	7.70928	2960	7.70928	2761
7.71577	2700	7.71577	2770	7.71577	2720
7.72223	3181	7.72223	3504	7.72223	2845
7.7287	2908	7.7287	3453	7.7287	2954
7.73517	3075	7.73517	2981	7.73517	2822
7.74163	3817	7.74163	3263	7.74163	3035
7.7481	2966	7.7481	3039	7.7481	2882
7.75457	2849	7.75457	2960	7.75457	2680
7.76103	2885	7.76103	3144	7.76103	2444
7.76752	2963	7.76752	3057	7.76752	3013
7.77398	3223	7.77398	3575	7.77398	2803
7.78045	3095	7.78045	3765	7.78045	3118
7.78692	2935	7.78692	3059	7.78692	3112
7.79338	3350	7.79338	3193	7.79338	2854
7.79985	3439	7.79985	3015	7.79985	2813
7.80632	2931	7.80632	2922	7.80632	2923
7.81278	3203	7.81278	2977	7.81278	2722
7.81925	3138	7.81925	2858	7.81925	2703
7.82573	3007	7.82573	3032	7.82573	3172
7.8322	2840	7.8322	2961	7.8322	2980
7.83867	3111	7.83867	2698	7.83867	2804
7.84513	3343	7.84513	3140	7.84513	2644
7.8516	2899	7.8516	3083	7.8516	3484
7.85807	2968	7.85807	3119	7.85807	2669
7.86453	3324	7.86453	2866	7.86453	3191
7.871	3526	7.871	3310	7.871	3061
7.87748	3969	7.87748	2634	7.87748	3165
7.88395	3746	7.88395	3022	7.88395	2679
7.89042	4786	7.89042	3303	7.89042	3345
7.89688	5501	7.89688	2506	7.89688	2912
7.90335	5252	7.90335	3194	7.90335	2404
7.90982	4054	7.90982	3364	7.90982	3180
7.91628	5502	7.91628	3538	7.91628	2786
7.92275	4507	7.92275	3415	7.92275	3008
7.92922	5425	7.92922	3427	7.92922	3608
7.9357	5326	7.9357	3603	7.9357	3574
7.94217	4874	7.94217	3586	7.94217	3432
7.94863	4501	7.94863	3890	7.94863	2729
7.9551	4511	7.9551	3776	7.9551	3349
7.96157	3824	7.96157	3214	7.96157	2823
7.96803	3864	7.96803	3813	7.96803	3242
7.9745	5099	7.9745	3593	7.9745	2724
7.98097	4047	7.98097	3305	7.98097	2890
7.98745	3925	7.98745	3509	7.98745	2366
7.99392	3991	7.99392	3256	7.99392	2675
8.00038	3556	8.00038	3221	8.00038	2752
8.00685	3254	8.00685	3041	8.00685	2951
8.01332	3821	8.01332	3013	8.01332	3191
8.01978	3092	8.01978	2890	8.01978	2996
8.02625	3904	8.02625	3511	8.02625	3023
8.03272	3332	8.03272	3527	8.03272	2827
8.03918	3292	8.03918	3780	8.03918	2902
8.04567	3350	8.04567	3084	8.04567	3346
8.05213	2938	8.05213	2992	8.05213	3404
8.0586	3089	8.0586	3219	8.0586	2656
8.06507	2986	8.06507	3285	8.06507	3007
8.07153	3735	8.07153	3358	8.07153	2765
8.078	3490	8.078	3413	8.078	2884
8.08447	3083	8.08447	2765	8.08447	3149
8.09093	3386	8.09093	3017	8.09093	2974
8.09742	3107	8.09742	2720	8.09742	2712
8.10388	3358	8.10388	3432	8.10388	2953
8.11035	3299	8.11035	3503	8.11035	2892
8.11682	2547	8.11682	3271	8.11682	2903
8.12328	3378	8.12328	2832	8.12328	2768
8.12975	3634	8.12975	3092	8.12975	3240
8.13622	3741	8.13622	2696	8.13622	3268
8.14268	3144	8.14268	3284	8.14268	2975
8.14915	2991	8.14915	2811	8.14915	2908
8.15563	3073	8.15563	3364	8.15563	2689
8.1621	3398	8.1621	3212	8.1621	3140
8.16857	3396	8.16857	3256	8.16857	2996
8.17503	3612	8.17503	3338	8.17503	2603
8.1815	3243	8.1815	3159	8.1815	2813
8.18797	3960	8.18797	2798	8.18797	2737
8.19443	3414	8.19443	3325	8.19443	2745
8.2009	2931	8.2009	3265	8.2009	2661
8.20738	2919	8.20738	3428	8.20738	3170
8.21385	3399	8.21385	3169	8.21385	2987
8.22032	3609	8.22032	3468	8.22032	3350
8.22678	3250	8.22678	2843	8.22678	2990
8.23325	3083	8.23325	3275	8.23325	3171
8.23972	3539	8.23972	2802	8.23972	2772
8.24618	3763	8.24618	2808	8.24618	2527
8.25265	3482	8.25265	3697	8.25265	2591
8.25913	3736	8.25913	3686	8.25913	2648
8.2656	3525	8.2656	3589	8.2656	2727
8.27207	3267	8.27207	3616	8.27207	3167
8.27853	3700	8.27853	3981	8.27853	3061
8.285	3917	8.285	3669	8.285	3084
8.29147	3462	8.29147	3305	8.29147	2532
8.29793	3688	8.29793	3304	8.29793	3218
8.3044	2856	8.3044	3792	8.3044	2868
8.31087	3269	8.31087	3459	8.31087	2959
8.31735	3128	8.31735	3219	8.31735	2866
8.32382	3453	8.32382	3409	8.32382	2901
8.33028	4037	8.33028	3015	8.33028	2895
8.33675	4312	8.33675	3021	8.33675	2943
8.34322	4510	8.34322	3124	8.34322	3349
8.34968	4102	8.34968	3386	8.34968	2573
8.35615	4580	8.35615	3000	8.35615	2751
8.36262	5037	8.36262	2778	8.36262	2909
8.3691	5326	8.3691	2991	8.3691	2770
8.37557	4305	8.37557	3221	8.37557	2644
8.38203	5549	8.38203	3104	8.38203	2818
8.3885	7895	8.3885	3650	8.3885	2924
8.39497	9678	8.39497	3775	8.39497	3227
8.40143	10639	8.40143	4317	8.40143	3323
8.4079	11862	8.4079	4306	8.4079	3768
8.41437	13360	8.41437	4650	8.41437	3856
8.42083	12990	8.42083	4841	8.42083	4699
8.42732	11862	8.42732	4660	8.42732	3682
8.43378	10385	8.43378	4737	8.43378	3819
8.44025	8532	8.44025	5090	8.44025	4097
8.44672	8514	8.44672	5598	8.44672	7763
8.45318	7677	8.45318	12014	8.45318	17845
8.45965	8634	8.45965	31067	8.45965	51127
8.46612	12388	8.46612	80671	8.46612	140103
8.47258	21365	8.47258	188125	8.47258	340090
8.47907	37289	8.47907	399745	8.47907	701715
8.48553	64441	8.48553	738098	8.48553	1287812
8.492	94925	8.492	1170734	8.492	2056592
8.49847	135551	8.49847	1583207	8.49847	2803556
8.50493	160817	8.50493	1874946	8.50493	3333869
8.5114	168146	8.5114	1931120	8.5114	3540805
8.51787	156085	8.51787	1754253	8.51787	3301316
8.52433	127215	8.52433	1394530	8.52433	2660104
8.5308	96873	8.5308	983256	8.5308	1874398
8.53728	62872	8.53728	605806	8.53728	1153578
8.54375	35896	8.54375	339617	8.54375	629792
8.55022	21135	8.55022	173714	8.55022	310505
8.55668	13151	8.55668	84483	8.55668	144936
8.56315	10904	8.56315	46142	8.56315	71965
8.56962	12020	8.56962	43228	8.56962	53867
8.57608	18395	8.57608	65533	8.57608	71102
8.58255	29052	8.58255	107700	8.58255	112895
8.58903	47722	8.58903	178861	8.58903	184397
8.5955	69120	8.5955	254553	8.5955	265202
8.60197	85177	8.60197	327296	8.60197	340420
8.60843	95356	8.60843	369370	8.60843	378710
8.6149	94397	8.6149	362480	8.6149	383613
8.62137	86623	8.62137	315462	8.62137	327461
8.62783	68117	8.62783	250490	8.62783	253574
8.6343	51315	8.6343	176003	8.6343	179255
8.64077	32009	8.64077	110454	8.64077	116167
8.64725	20295	8.64725	65668	8.64725	66340
8.65372	12128	8.65372	34940	8.65372	36789
8.66018	7072	8.66018	19349	8.66018	20522
8.66665	6189	8.66665	11000	8.66665	11504
8.67312	3452	8.67312	6571	8.67312	6660
8.67958	4249	8.67958	4998	8.67958	5015
8.68605	4562	8.68605	4100	8.68605	4406
8.69252	3413	8.69252	4315	8.69252	4379
8.699	3417	8.699	3718	8.699	3550
8.70547	3152	8.70547	4059	8.70547	3689
8.71193	2996	8.71193	3980	8.71193	3301
8.7184	3426	8.7184	3763	8.7184	4370
8.72487	3795	8.72487	3463	8.72487	4218
8.73133	3766	8.73133	4025	8.73133	3816
8.7378	3529	8.7378	4034	8.7378	3539
8.74427	3164	8.74427	3256	8.74427	3599
8.75073	3450	8.75073	3639	8.75073	3110
8.75722	3018	8.75722	3687	8.75722	4758
8.76368	3738	8.76368	3409	8.76368	3560
8.77015	3544	8.77015	3518	8.77015	3121
8.77662	3207	8.77662	3460	8.77662	3362
8.78308	3086	8.78308	2956	8.78308	3515
8.78955	3196	8.78955	3237	8.78955	3302
8.79602	3538	8.79602	3686	8.79602	3287
8.80248	3615	8.80248	3351	8.80248	3104
8.80897	3122	8.80897	3371	8.80897	3519
8.81543	3320	8.81543	3375	8.81543	3120
8.8219	3763	8.8219	3257	8.8219	3111
8.82837	3988	8.82837	3155	8.82837	2839
8.83483	3489	8.83483	3241	8.83483	3343
8.8413	3884	8.8413	3079	8.8413	3215
8.84777	2591	8.84777	3025	8.84777	3429
8.85423	3663	8.85423	3232	8.85423	2991
8.86072	3306	8.86072	3148	8.86072	3181
8.86718	4133	8.86718	3731	8.86718	2931
8.87365	3619	8.87365	2965	8.87365	3157
8.88012	3654	8.88012	2981	8.88012	3128
8.88658	3861	8.88658	3695	8.88658	2644
8.89305	3529	8.89305	3055	8.89305	2957
8.89952	2805	8.89952	3207	8.89952	3313
8.90598	3993	8.90598	3086	8.90598	3532
8.91245	3518	8.91245	3194	8.91245	3592
8.91893	3467	8.91893	3351	8.91893	3151
8.9254	4066	8.9254	3601	8.9254	2966
8.93187	3231	8.93187	3232	8.93187	3569
8.93833	2946	8.93833	3888	8.93833	3199
8.9448	2993	8.9448	2951	8.9448	3284
8.95127	3692	8.95127	3393	8.95127	2709
8.95773	3258	8.95773	3348	8.95773	2251
8.9642	2600	8.9642	3078	8.9642	3206
8.97068	3418	8.97068	3450	8.97068	2706
8.97715	3475	8.97715	2549	8.97715	2688
8.98362	2916	8.98362	2431	8.98362	2760
8.99008	3201	8.99008	3327	8.99008	3340
8.99655	3527	8.99655	3114	8.99655	3860
9.00302	4008	9.00302	3577	9.00302	3701
9.00948	3611	9.00948	3444	9.00948	3885
9.01595	3696	9.01595	3640	9.01595	3547
9.02242	3483	9.02242	3145	9.02242	4002
9.0289	3619	9.0289	3962	9.0289	3701
9.03537	3086	9.03537	3183	9.03537	4024
9.04183	3593	9.04183	3533	9.04183	3642
9.0483	2707	9.0483	3457	9.0483	3800
9.05477	4286	9.05477	3475	9.05477	3922
9.06123	3042	9.06123	3624	9.06123	3848
9.0677	3771	9.0677	3405	9.0677	4250
9.07417	4055	9.07417	4277	9.07417	3813
9.08065	3695	9.08065	3779	9.08065	4016
9.08712	3614	9.08712	3748	9.08712	3074
9.09358	4160	9.09358	4142	9.09358	3222
9.10005	4589	9.10005	3585	9.10005	3166
9.10652	5547	9.10652	3562	9.10652	3054
9.11298	6111	9.11298	3998	9.11298	2874
9.11945	7389	9.11945	4501	9.11945	2835
9.12592	6953	9.12592	4645	9.12592	3137
9.13238	7665	9.13238	4786	9.13238	2548
9.13887	6809	9.13887	4350	9.13887	2696
9.14533	5574	9.14533	4029	9.14533	2888
9.1518	5614	9.1518	5440	9.1518	4106
9.15827	5414	9.15827	8165	9.15827	6587
9.16473	5989	9.16473	16134	9.16473	16218
9.1712	8474	9.1712	38079	9.1712	40081
9.17767	14442	9.17767	81151	9.17767	89093
9.18413	27503	9.18413	165230	9.18413	191834
9.19062	48833	9.19062	305338	9.19062	357581
9.19708	75376	9.19708	509046	9.19708	571909
9.20355	110775	9.20355	729137	9.20355	818624
9.21002	137307	9.21002	891671	9.21002	994239
9.21648	156582	9.21648	983214	9.21648	1067186
9.22295	154896	9.22295	943824	9.22295	1020270
9.22942	141778	9.22942	805796	9.22942	852197
9.23588	122785	9.23588	634856	9.23588	637752
9.24235	112233	9.24235	499687	9.24235	435544
9.24883	108436	9.24883	401634	9.24883	280281
9.2553	118608	9.2553	380687	9.2553	174183
9.26177	141902	9.26177	395679	9.26177	113655
9.26823	157072	9.26823	415747	9.26823	83262
9.2747	163060	9.2747	405980	9.2747	66311
9.28117	151091	9.28117	365226	9.28117	56764
9.28763	134295	9.28763	305589	9.28763	46468
9.2941	112880	9.2941	230229	9.2941	37604
9.30058	94144	9.30058	161901	9.30058	28608
9.30705	76665	9.30705	115978	9.30705	23151
9.31352	72714	9.31352	83737	9.31352	19332
9.31998	74221	9.31998	64384	9.31998	14626
9.32645	74692	9.32645	54065	9.32645	14884
9.33292	71153	9.33292	48044	9.33292	12502
9.33938	66763	9.33938	43934	9.33938	11359
9.34585	57829	9.34585	39413	9.34585	10784
9.35232	49380	9.35232	32974	9.35232	11080
9.3588	38145	9.3588	27875	9.3588	9205
9.36527	30070	9.36527	23837	9.36527	9494
9.37173	23870	9.37173	19473	9.37173	9264
9.3782	18597	9.3782	16455	9.3782	8906
9.38467	16886	9.38467	14292	9.38467	7464
9.39113	12315	9.39113	12579	9.39113	7155
9.3976	10659	9.3976	10359	9.3976	7803
9.40407	10490	9.40407	10537	9.40407	6382
9.41055	8413	9.41055	9238	9.41055	6905
9.41702	7901	9.41702	8458	9.41702	6388
9.42348	8019	9.42348	8111	9.42348	5848
9.42995	6781	9.42995	7486	9.42995	6026
9.43642	7075	9.43642	7945	9.43642	6213
9.44288	7222	9.44288	8345	9.44288	5398
9.44935	7383	9.44935	8801	9.44935	5408
9.45582	6284	9.45582	10258	9.45582	6092
9.46228	7212	9.46228	10847	9.46228	5385
9.46877	5537	9.46877	8995	9.46877	5962
9.47523	6241	9.47523	9820	9.47523	4955
9.4817	5587	9.4817	8654	9.4817	4961
9.48817	4986	9.48817	6568	9.48817	5035
9.49463	5358	9.49463	6694	9.49463	4909
9.5011	5461	9.5011	5999	9.5011	5003
9.50757	4671	9.50757	5628	9.50757	5435
9.51403	4938	9.51403	5357	9.51403	5068
9.52052	5889	9.52052	5404	9.52052	4836
9.52698	4662	9.52698	5856	9.52698	6515
9.53345	6906	9.53345	7450	9.53345	8688
9.53992	7380	9.53992	7678	9.53992	10546
9.54638	8984	9.54638	8989	9.54638	13666
9.55285	12587	9.55285	11336	9.55285	17487
9.55932	13769	9.55932	12246	9.55932	18422
9.56578	16645	9.56578	12407	9.56578	18376
9.57227	17233	9.57227	13190	9.57227	16915
9.57873	18805	9.57873	11892	9.57873	13887
9.5852	18472	9.5852	10556	9.5852	10479
9.59167	16956	9.59167	9624	9.59167	8152
9.59813	14384	9.59813	7617	9.59813	6798
9.6046	11836	9.6046	6797	9.6046	5751
9.61107	10692	9.61107	6404	9.61107	5203
9.61753	9628	9.61753	5434	9.61753	4699
9.624	10624	9.624	6186	9.624	4855
9.63048	10969	9.63048	7277	9.63048	5475
9.63695	11195	9.63695	8353	9.63695	4866
9.64342	14323	9.64342	10098	9.64342	6594
9.64988	14853	9.64988	10970	9.64988	6806
9.65635	15756	9.65635	12579	9.65635	8196
9.66282	13599	9.66282	11951	9.66282	8560
9.66928	13383	9.66928	13724	9.66928	8579
9.67575	12037	9.67575	13991	9.67575	10419
9.68223	11775	9.68223	16298	9.68223	13336
9.6887	15634	9.6887	20463	9.6887	15232
9.69517	15795	9.69517	23992	9.69517	18460
9.70163	17299	9.70163	26720	9.70163	20034
9.7081	17481	9.7081	27179	9.7081	21245
9.71457	17220	9.71457	25817	9.71457	20026
9.72103	15995	9.72103	23101	9.72103	16630
9.7275	12822	9.7275	19362	9.7275	14303
9.73397	11151	9.73397	14660	9.73397	10854
9.74045	10803	9.74045	11175	9.74045	8878
9.74692	8518	9.74692	9669	9.74692	6351
9.75338	6733	9.75338	7658	9.75338	5554
9.75985	7120	9.75985	5484	9.75985	5374
9.76632	4527	9.76632	5658	9.76632	4680
9.77278	5351	9.77278	5808	9.77278	3856
9.77925	4951	9.77925	4574	9.77925	4282
9.78572	4433	9.78572	4421	9.78572	4230
9.7922	5083	9.7922	4686	9.7922	4320
9.79867	4097	9.79867	4625	9.79867	4838
9.80513	4705	9.80513	5023	9.80513	4698
9.8116	4034	9.8116	4419	9.8116	4057
9.81807	4688	9.81807	4762	9.81807	4426
9.82453	4151	9.82453	5130	9.82453	3825
9.831	4603	9.831	4247	9.831	3788
9.83747	4110	9.83747	4258	9.83747	4109
9.84393	3604	9.84393	4205	9.84393	4076
9.85042	3782	9.85042	3798	9.85042	4131
9.85688	3674	9.85688	3897	9.85688	3687
9.86335	4544	9.86335	3952	9.86335	4146
9.86982	4228	9.86982	4069	9.86982	4046
9.87628	4394	9.87628	4050	9.87628	3326
9.88275	4059	9.88275	3751	9.88275	4217
9.88922	3552	9.88922	3919	9.88922	3913
9.89568	3976	9.89568	3885	9.89568	3871
9.90217	3949	9.90217	3890	9.90217	3875
9.90863	4261	9.90863	3804	9.90863	3867
9.9151	3748	9.9151	3957	9.9151	3873
9.92157	4101	9.92157	4028	9.92157	3425
9.92803	3647	9.92803	3695	9.92803	3636
9.9345	3980	9.9345	3777	9.9345	3927
9.94097	4398	9.94097	3987	9.94097	3888
9.94743	3585	9.94743	3985	9.94743	3874
9.9539	4150	9.9539	3942	9.9539	3778
9.96038	3433	9.96038	3770	9.96038	3449
9.96685	4037	9.96685	4006	9.96685	3736
9.97332	3709	9.97332	3273	9.97332	3512
9.97978	3871	9.97978	3919	9.97978	3780
9.98625	3779	9.98625	4461	9.98625	3751
9.99272	4119	9.99272	3759	9.99272	4086
9.99918	3840	9.99918	3920	9.99918	3727
10.0056	4310	10.0056	3487	10.0056	4183
10.0121	3872	10.0121	4316	10.0121	3907
10.0186	3969	10.0186	3869	10.0186	4465
10.0251	3842	10.0251	3845	10.0251	4160
10.0315	3912	10.0315	3662	10.0315	3720
10.038	4078	10.038	4175	10.038	3354
10.0445	3437	10.0445	3090	10.0445	3631
10.0509	4060	10.0509	3671	10.0509	4367
10.0574	3409	10.0574	2982	10.0574	3262
10.0639	3661	10.0639	3728	10.0639	3859
10.0703	4139	10.0703	3468	10.0703	3715
10.0768	3804	10.0768	3609	10.0768	3905
10.0833	3357	10.0833	4254	10.0833	4085
10.0898	4131	10.0898	3748	10.0898	3743
10.0962	3965	10.0962	3702	10.0962	3096
10.1027	4051	10.1027	3679	10.1027	3542
10.1091	4150	10.1091	3489	10.1091	3991
10.1156	3327	10.1156	3676	10.1156	3752
10.1221	4510	10.1221	4369	10.1221	3536
10.1286	4988	10.1286	4515	10.1286	4250
10.135	7397	10.135	6241	10.135	4889
10.1415	8227	10.1415	7637	10.1415	6948
10.148	11216	10.148	15402	10.148	10706
10.1544	16286	10.1544	31171	10.1544	19513
10.1609	27529	10.1609	64832	10.1609	41002
10.1674	51486	10.1674	139623	10.1674	83684
10.1738	96339	10.1738	284323	10.1738	168334
10.1803	164119	10.1803	503831	10.1803	297138
10.1868	265329	10.1868	773077	10.1868	469927
10.1933	368061	10.1933	1091759	10.1933	669359
10.1997	475679	10.1997	1366642	10.1997	822512
10.2062	529805	10.2062	1534232	10.2062	899341
10.2127	533684	10.2127	1512574	10.2127	864539
10.2191	485477	10.2191	1327490	10.2191	771750
10.2256	398934	10.2256	1051623	10.2256	609866
10.2321	300862	10.2321	760038	10.2321	439749
10.2385	215636	10.2385	499570	10.2385	281158
10.245	139374	10.245	301792	10.245	169217
10.2515	87359	10.2515	170079	10.2515	96445
10.2579	53535	10.2579	87720	10.2579	52437
10.2644	33539	10.2644	49678	10.2644	28843
10.2709	22936	10.2709	27256	10.2709	17494
10.2773	16239	10.2773	17616	10.2773	11320
10.2838	11529	10.2838	12295	10.2838	9608
10.2903	10324	10.2903	9787	10.2903	6721
10.2967	9157	10.2967	8030	10.2967	7484
10.3032	8013	10.3032	7427	10.3032	6755
10.3097	8150	10.3097	7107	10.3097	6010
10.3162	5830	10.3162	6765	10.3162	6268
10.3226	6980	10.3226	6592	10.3226	5111
10.3291	5711	10.3291	5671	10.3291	5103
10.3355	5461	10.3355	6021	10.3355	5234
10.342	6129	10.342	6289	10.342	5246
10.3485	7318	10.3485	6827	10.3485	5560
10.355	7157	10.355	6970	10.355	4539
10.3614	7088	10.3614	7963	10.3614	5111
10.3679	6984	10.3679	8056	10.3679	5329
10.3744	7141	10.3744	8522	10.3744	5255
10.3808	6255	10.3808	8013	10.3808	4926
10.3873	6369	10.3873	7934	10.3873	5013
10.3938	7023	10.3938	6838	10.3938	3957
10.4002	6069	10.4002	7133	10.4002	4278
10.4067	7110	10.4067	5852	10.4067	4286
10.4132	6103	10.4132	6342	10.4132	4629
10.4197	6174	10.4197	6122	10.4197	4098
10.4261	5519	10.4261	5408	10.4261	3683
10.4326	5766	10.4326	4494	10.4326	4001
10.439	5431	10.439	5207	10.439	4329
10.4455	4566	10.4455	5098	10.4455	5112
10.452	4526	10.452	4182	10.452	3850
10.4585	4483	10.4585	4677	10.4585	4150
10.4649	4823	10.4649	4016	10.4649	2917
10.4714	5518	10.4714	6138	10.4714	3900
10.4779	6528	10.4779	6754	10.4779	4597
10.4843	11640	10.4843	16644	10.4843	6136
10.4908	21611	10.4908	36812	10.4908	9901
10.4973	42363	10.4973	74752	10.4973	17845
10.5038	80395	10.5038	138976	10.5038	31494
10.5102	136359	10.5102	244441	10.5102	54358
10.5167	207239	10.5167	367577	10.5167	80452
10.5231	295100	10.5231	506097	10.5231	111053
10.5296	365850	10.5296	614897	10.5296	142939
10.5361	413268	10.5361	675285	10.5361	165096
10.5426	431092	10.5426	667182	10.5426	171952
10.549	396138	10.549	596517	10.549	152214
10.5555	333809	10.5555	469975	10.5555	129891
10.562	262618	10.562	353936	10.562	100621
10.5684	200731	10.5684	245656	10.5684	70001
10.5749	144491	10.5749	160400	10.5749	45737
10.5814	100287	10.5814	98717	10.5814	31060
10.5878	70421	10.5878	61112	10.5878	21391
10.5943	50235	10.5943	37542	10.5943	15789
10.6008	38117	10.6008	26237	10.6008	11411
10.6072	30374	10.6072	18403	10.6072	9641
10.6137	25739	10.6137	16130	10.6137	8770
10.6202	21669	10.6202	13772	10.6202	7727
10.6266	18896	10.6266	12908	10.6266	7933
10.6331	17581	10.6331	12177	10.6331	7196
10.6396	17171	10.6396	16215	10.6396	9908
10.6461	18581	10.6461	24294	10.6461	16683
10.6525	25606	10.6525	44589	10.6525	35081
10.659	40819	10.659	96427	10.659	70974
10.6654	72634	10.6654	194440	10.6654	148104
10.6719	126512	10.6719	358426	10.6719	273101
10.6784	215356	10.6784	615856	10.6784	472795
10.6849	321794	10.6849	954399	10.6849	722360
10.6913	452770	10.6913	1327267	10.6913	992803
10.6978	570175	10.6978	1698179	10.6978	1258764
10.7043	652766	10.7043	1961360	10.7043	1410505
10.7107	689403	10.7107	2059305	10.7107	1425549
10.7172	665967	10.7172	1968142	10.7172	1315901
10.7237	580201	10.7237	1702914	10.7237	1105745
10.7302	497191	10.7302	1366819	10.7302	843452
10.7366	447559	10.7366	1021107	10.7366	632483
10.7431	523322	10.7431	816015	10.7431	547262
10.7495	792837	10.7495	826325	10.7495	641666
10.756	1285672	10.756	1121056	10.756	946780
10.7625	2004331	10.7625	1695086	10.7625	1467909
10.769	2827518	10.769	2447833	10.769	2106234
10.7754	3617743	10.7754	3240896	10.7754	2731166
10.7819	4280806	10.7819	3952436	10.7819	3153234
10.7884	4525265	10.7884	4299688	10.7884	3388508
10.7948	4340785	10.7948	4256880	10.7948	3241038
10.8013	3724727	10.8013	3731544	10.8013	2743646
10.8078	2854297	10.8078	2913491	10.8078	2067722
10.8142	1951048	10.8142	2045975	10.8142	1427446
10.8207	1243320	10.8207	1301781	10.8207	899124
10.8272	733525	10.8272	775005	10.8272	531088
10.8337	408945	10.8337	434515	10.8337	304442
10.8401	217981	10.8401	235109	10.8401	166866
10.8466	116759	10.8466	124447	10.8466	89160
10.853	64254	10.853	65381	10.853	51198
10.8595	39263	10.8595	36893	10.8595	28591
10.866	24162	10.866	23788	10.866	18213
10.8725	18026	10.8725	16589	10.8725	13217
10.8789	14044	10.8789	13133	10.8789	11384
10.8854	12006	10.8854	12167	10.8854	8951
10.8919	11810	10.8919	11066	10.8919	8164
10.8983	10283	10.8983	9236	10.8983	8385
10.9048	10003	10.9048	8677	10.9048	7473
10.9113	9138	10.9113	8862	10.9113	6665
10.9177	8208	10.9177	7729	10.9177	6605
10.9242	8972	10.9242	6470	10.9242	6201
10.9307	8673	10.9307	7583	10.9307	6092
10.9371	7901	10.9371	7063	10.9371	6131
10.9436	7102	10.9436	7641	10.9436	5918
10.9501	7166	10.9501	6939	10.9501	4924
10.9566	7271	10.9566	5530	10.9566	5336
10.963	7262	10.963	6141	10.963	5653
10.9695	8014	10.9695	5592	10.9695	6376
10.9759	7529	10.9759	7049	10.9759	6017
10.9824	8167	10.9824	6777	10.9824	6240
10.9889	7125	10.9889	6475	10.9889	6702
10.9954	6737	10.9954	6266	10.9954	6541
11.0018	7442	11.0018	7012	11.0018	5936
11.0083	7464	11.0083	6672	11.0083	5046
11.0148	6069	11.0148	6104	11.0148	5862
11.0212	5696	11.0212	5238	11.0212	4953
11.0277	5718	11.0277	5750	11.0277	4899
11.0342	5221	11.0342	6794	11.0342	4627
11.0406	4510	11.0406	5159	11.0406	4260
11.0471	5247	11.0471	5976	11.0471	3943
11.0536	4664	11.0536	5138	11.0536	3854
11.0601	4890	11.0601	6465	11.0601	3989
11.0665	4995	11.0665	5596	11.0665	3182
11.073	4439	11.073	5911	11.073	3968
11.0794	4003	11.0794	5435	11.0794	3415
11.0859	5425	11.0859	5884	11.0859	3800
11.0924	4636	11.0924	5243	11.0924	3962
11.0989	4764	11.0989	4661	11.0989	3294
11.1053	4802	11.1053	5385	11.1053	3438
11.1118	4988	11.1118	5232	11.1118	3517
11.1183	4782	11.1183	5701	11.1183	4393
11.1247	6105	11.1247	5649	11.1247	4139
11.1312	5581	11.1312	7857	11.1312	6139
11.1377	6980	11.1377	7334	11.1377	7660
11.1441	6918	11.1441	9887	11.1441	7109
11.1506	7127	11.1506	11865	11.1506	8305
11.1571	6539	11.1571	11632	11.1571	9871
11.1636	7176	11.1636	12392	11.1636	10585
11.17	7082	11.17	11256	11.17	9642
11.1765	7386	11.1765	10370	11.1765	8048
11.1829	6278	11.1829	9113	11.1829	7964
11.1894	6817	11.1894	8518	11.1894	7394
11.1959	6146	11.1959	6850	11.1959	6427
11.2023	4376	11.2023	5412	11.2023	4674
11.2088	5302	11.2088	5794	11.2088	4467
11.2153	4487	11.2153	5159	11.2153	4276
11.2218	5318	11.2218	4814	11.2218	4976
11.2282	5487	11.2282	4725	11.2282	3524
11.2347	5531	11.2347	5372	11.2347	3677
11.2412	5042	11.2412	4156	11.2412	3046
11.2476	4275	11.2476	4719	11.2476	3130
11.2541	4111	11.2541	3959	11.2541	3584
11.2606	4467	11.2606	4269	11.2606	3021
11.267	3504	11.267	5005	11.267	3110
11.2735	4194	11.2735	4808	11.2735	3228
11.28	4292	11.28	4261	11.28	4044
11.2865	4330	11.2865	3824	11.2865	3378
11.2929	4309	11.2929	4153	11.2929	3136
11.2994	4704	11.2994	4164	11.2994	3597
11.3058	4390	11.3058	4903	11.3058	3627
11.3123	6296	11.3123	3928	11.3123	3227
11.3188	4588	11.3188	3294	11.3188	2801
11.3253	5004	11.3253	3647	11.3253	3327
11.3317	6490	11.3317	4472	11.3317	3413
11.3382	5136	11.3382	3830	11.3382	3883
11.3447	5439	11.3447	4242	11.3447	3228
11.3511	4832	11.3511	3834	11.3511	2849
11.3576	4837	11.3576	4326	11.3576	3515
11.3641	5038	11.3641	3863	11.3641	3590
11.3705	4793	11.3705	4764	11.3705	3657
11.377	6362	11.377	3794	11.377	3950
11.3835	6113	11.3835	4554	11.3835	3408
11.39	6496	11.39	4238	11.39	4506
11.3964	8223	11.3964	4733	11.3964	4001
11.4029	7906	11.4029	4176	11.4029	4286
11.4093	6528	11.4093	4221	11.4093	4079
11.4158	6842	11.4158	3385	11.4158	3786
11.4223	6611	11.4223	4374	11.4223	3965
11.4288	5799	11.4288	4158	11.4288	3356
11.4352	4236	11.4352	3911	11.4352	2990
11.4417	4563	11.4417	3689	11.4417	3927
11.4482	4176	11.4482	3628	11.4482	2666
11.4546	3955	11.4546	3328	11.4546	2778
11.4611	4192	11.4611	4081	11.4611	3204
11.4676	4123	11.4676	4208	11.4676	3065
11.474	3356	11.474	4801	11.474	3215
11.4805	3323	11.4805	3652	11.4805	2873
11.487	3715	11.487	3509	11.487	3212
11.4934	4055	11.4934	2813	11.4934	3300
11.4999	4185	11.4999	3193	11.4999	3000
11.5064	3158	11.5064	3938	11.5064	2810
11.5129	3526	11.5129	3575	11.5129	2927
11.5193	3821	11.5193	3768	11.5193	3097
11.5258	3756	11.5258	3688	11.5258	2765
11.5322	3197	11.5322	3867	11.5322	3324
11.5387	3544	11.5387	4374	11.5387	3096
11.5452	3658	11.5452	4519	11.5452	3695
11.5517	4818	11.5517	5711	11.5517	3931
11.5581	4398	11.5581	8220	11.5581	6257
11.5646	5069	11.5646	9928	11.5646	10066
11.5711	5814	11.5711	16342	11.5711	13986
11.5775	6401	11.5775	19946	11.5775	19275
11.584	8007	11.584	25850	11.584	25694
11.5905	9171	11.5905	29904	11.5905	29166
11.5969	10009	11.5969	29523	11.5969	31363
11.6034	9532	11.6034	27823	11.6034	30138
11.6099	7980	11.6099	27041	11.6099	27968
11.6164	8294	11.6164	22368	11.6164	22515
11.6228	6605	11.6228	17041	11.6228	17615
11.6293	6141	11.6293	12579	11.6293	13117
11.6357	6053	11.6357	9411	11.6357	9764
11.6422	5526	11.6422	7030	11.6422	6894
11.6487	4308	11.6487	6075	11.6487	5641
11.6552	4114	11.6552	4854	11.6552	4772
11.6616	3634	11.6616	4957	11.6616	4295
11.6681	3845	11.6681	3993	11.6681	3606
11.6746	2825	11.6746	3869	11.6746	4326
11.681	3926	11.681	4255	11.681	4002
11.6875	3393	11.6875	4034	11.6875	3941
11.694	3674	11.694	4025	11.694	3898
11.7004	3988	11.7004	3846	11.7004	3291
11.7069	4430	11.7069	4290	11.7069	4157
11.7134	4373	11.7134	3909	11.7134	4618
11.7198	3856	11.7198	4139	11.7198	4099
11.7263	4995	11.7263	4259	11.7263	4363
11.7328	4670	11.7328	3834	11.7328	4538
11.7393	4556	11.7393	3328	11.7393	4177
11.7457	4235	11.7457	3551	11.7457	5203
11.7522	4613	11.7522	4169	11.7522	3914
11.7586	4216	11.7586	3956	11.7586	3803
11.7651	3879	11.7651	3890	11.7651	4118
11.7716	4065	11.7716	3616	11.7716	3240
11.7781	3093	11.7781	3416	11.7781	3226
11.7845	4050	11.7845	4445	11.7845	3413
11.791	3779	11.791	3406	11.791	3597
11.7975	3631	11.7975	3567	11.7975	3896
11.8039	3824	11.8039	3968	11.8039	3681
11.8104	3926	11.8104	3650	11.8104	3582
11.8169	3375	11.8169	3397	11.8169	3736
11.8233	3348	11.8233	3182	11.8233	3722
11.8298	3477	11.8298	3570	11.8298	3208
11.8363	3034	11.8363	2977	11.8363	2986
11.8428	3206	11.8428	2800	11.8428	3287
11.8492	2778	11.8492	3429	11.8492	2422
11.8557	3089	11.8557	2534	11.8557	2702
11.8621	3205	11.8621	3480	11.8621	2993
11.8686	3027	11.8686	3133	11.8686	3070
11.8751	3324	11.8751	3225	11.8751	3129
11.8816	3567	11.8816	3098	11.8816	2569
11.888	2547	11.888	3635	11.888	3259
11.8945	2753	11.8945	3444	11.8945	2815
11.901	2769	11.901	3376	11.901	3319
11.9074	3657	11.9074	3090	11.9074	2745
11.9139	3316	11.9139	2930	11.9139	3492
11.9204	2651	11.9204	2842	11.9204	3112
11.9268	3652	11.9268	3513	11.9268	2908
11.9333	4829	11.9333	5448	11.9333	5165
11.9398	7476	11.9398	12644	11.9398	7247
11.9462	18984	11.9462	27564	11.9462	20822
11.9527	40856	11.9527	67926	11.9527	44736
11.9592	94048	11.9592	158307	11.9592	102230
11.9657	186790	11.9657	328350	11.9657	207314
11.9721	354042	11.9721	615560	11.9721	393865
11.9786	578174	11.9786	1035886	11.9786	649915
11.9851	881110	11.9851	1554641	11.9851	984247
11.9915	1217510	11.9915	2156616	11.9915	1340004
11.998	1487503	11.998	2736943	11.998	1654083
12.0045	1656919	12.0045	3178439	12.0045	1825080
12.0109	1679971	12.0109	3394498	12.0109	1846305
12.0174	1555195	12.0174	3275866	12.0174	1677911
12.0239	1277048	12.0239	2868157	12.0239	1377126
12.0303	958505	12.0303	2225401	12.0303	1023746
12.0368	660761	12.0368	1525471	12.0368	682134
12.0433	416699	12.0433	936668	12.0433	417960
12.0497	245070	12.0497	509633	12.0497	234445
12.0562	136075	12.0562	257864	12.0562	124552
12.0627	75347	12.0627	128102	12.0627	63838
12.0692	42876	12.0692	63446	12.0692	33804
12.0756	28930	12.0756	31775	12.0756	19587
12.0821	20842	12.0821	20214	12.0821	12562
12.0886	16829	12.0886	14002	12.0886	12497
12.095	14303	12.095	13081	12.095	10556
12.1015	13432	12.1015	11712	12.1015	11938
12.108	13939	12.108	11767	12.108	12593
12.1144	13721	12.1144	11772	12.1144	14700
12.1209	13308	12.1209	9871	12.1209	14950
12.1274	11893	12.1274	10695	12.1274	13390
12.1338	11232	12.1338	9508	12.1338	12211
12.1403	10006	12.1403	9114	12.1403	10720
12.1468	8760	12.1468	7704	12.1468	8187
12.1532	7937	12.1532	7749	12.1532	7180
12.1597	6083	12.1597	5640	12.1597	5989
12.1662	5865	12.1662	5884	12.1662	5730
12.1727	5283	12.1727	4873	12.1727	4931
12.1791	5065	12.1791	5422	12.1791	4049
12.1856	4465	12.1856	5986	12.1856	3998
12.1921	4896	12.1921	4930	12.1921	3960
12.1985	4944	12.1985	4363	12.1985	3678
12.205	3827	12.205	5480	12.205	3232
12.2115	4022	12.2115	4141	12.2115	3923
12.2179	4100	12.2179	4498	12.2179	3839
12.2244	4226	12.2244	4411	12.2244	4401
12.2309	4358	12.2309	4546	12.2309	4237
12.2373	4939	12.2373	5146	12.2373	5314
12.2438	5793	12.2438	4938	12.2438	6670
12.2503	6158	12.2503	5875	12.2503	8053
12.2568	7068	12.2568	6878	12.2568	10406
12.2632	8598	12.2632	7765	12.2632	14615
12.2697	8908	12.2697	8657	12.2697	17413
12.2761	9937	12.2761	9046	12.2761	19139
12.2826	10519	12.2826	10019	12.2826	19104
12.2891	10170	12.2891	8955	12.2891	16124
12.2956	8641	12.2956	8421	12.2956	13054
12.302	7876	12.302	8033	12.302	10713
12.3085	7229	12.3085	7151	12.3085	8298
12.315	6829	12.315	6741	12.315	6443
12.3214	7382	12.3214	6847	12.3214	7133
12.3279	6242	12.3279	6513	12.3279	8623
12.3344	6051	12.3344	7229	12.3344	8754
12.3408	6410	12.3408	9084	12.3408	9871
12.3473	5575	12.3473	9183	12.3473	10854
12.3538	6950	12.3538	8175	12.3538	11930
12.3602	6628	12.3602	7796	12.3602	11587
12.3667	7586	12.3667	8063	12.3667	10406
12.3732	7045	12.3732	7177	12.3732	9298
12.3796	6011	12.3796	5803	12.3796	8652
12.3861	6429	12.3861	6237	12.3861	7888
12.3926	5598	12.3926	4882	12.3926	6083
12.3991	5107	12.3991	4471	12.3991	4804
12.4055	4599	12.4055	4488	12.4055	4260
12.412	3470	12.412	3341	12.412	3501
12.4185	3016	12.4185	3286	12.4185	3417
12.4249	3466	12.4249	3652	12.4249	3511
12.4314	4124	12.4314	3457	12.4314	2963
12.4379	2937	12.4379	3412	12.4379	2885
12.4443	2888	12.4443	2623	12.4443	3755
12.4508	3034	12.4508	3191	12.4508	3253
12.4573	3618	12.4573	3586	12.4573	3246
12.4637	3131	12.4637	3469	12.4637	3519
12.4702	3048	12.4702	3105	12.4702	2956
12.4767	2496	12.4767	3391	12.4767	2973
12.4832	3366	12.4832	3448	12.4832	3287
12.4896	3746	12.4896	3205	12.4896	2958
12.4961	3423	12.4961	3126	12.4961	3529
12.5025	3777	12.5025	3493	12.5025	3521
12.509	4102	12.509	2905	12.509	3918
12.5155	4178	12.5155	4020	12.5155	4383
12.522	5172	12.522	3995	12.522	6472
12.5284	6336	12.5284	5009	12.5284	8027
12.5349	8296	12.5349	6467	12.5349	11192
12.5414	9394	12.5414	7609	12.5414	13799
12.5478	10370	12.5478	9424	12.5478	14651
12.5543	11913	12.5543	8605	12.5543	16057
12.5608	11642	12.5608	8676	12.5608	15465
12.5672	11029	12.5672	8627	12.5672	13740
12.5737	10300	12.5737	8517	12.5737	12330
12.5802	9347	12.5802	5750	12.5802	9015
12.5867	8981	12.5867	5562	12.5867	7642
12.5931	7451	12.5931	4621	12.5931	5225
12.5996	8230	12.5996	3920	12.5996	4146
12.606	8214	12.606	3516	12.606	3245
12.6125	6794	12.6125	3894	12.6125	3248
12.619	6647	12.619	3626	12.619	3147
12.6255	6655	12.6255	3754	12.6255	3316
12.6319	6053	12.6319	3363	12.6319	2929
12.6384	5666	12.6384	3700	12.6384	2802
12.6449	5715	12.6449	3349	12.6449	3003
12.6513	5128	12.6513	3219	12.6513	2827
12.6578	3983	12.6578	3868	12.6578	2933
12.6643	3966	12.6643	3272	12.6643	3433
12.6707	4920	12.6707	3492	12.6707	3461
12.6772	4323	12.6772	3409	12.6772	3602
12.6837	4739	12.6837	3720	12.6837	2896
12.6901	4637	12.6901	3804	12.6901	3822
12.6966	4127	12.6966	3825	12.6966	3304
12.7031	4568	12.7031	3383	12.7031	3152
12.7096	4531	12.7096	3643	12.7096	2965
12.716	4644	12.716	3406	12.716	3054
12.7225	4605	12.7225	3139	12.7225	3133
12.7289	3733	12.7289	3321	12.7289	2840
12.7354	3729	12.7354	3012	12.7354	3194
12.7419	4089	12.7419	2881	12.7419	2835
12.7484	4283	12.7484	3533	12.7484	3284
12.7548	4416	12.7548	3103	12.7548	3530
12.7613	3853	12.7613	3601	12.7613	3032
12.7678	3471	12.7678	2771	12.7678	2951
12.7742	4289	12.7742	3150	12.7742	3114
12.7807	3308	12.7807	3336	12.7807	2727
12.7872	2952	12.7872	3262	12.7872	2798
12.7936	3388	12.7936	2756	12.7936	3331
12.8001	3308	12.8001	2952	12.8001	3229
12.8066	3696	12.8066	3161	12.8066	2708
12.8131	2916	12.8131	2982	12.8131	3220
12.8195	3727	12.8195	3476	12.8195	2451
12.826	3811	12.826	3154	12.826	3066
12.8324	3800	12.8324	3172	12.8324	2825
12.8389	3231	12.8389	3321	12.8389	2909
12.8454	2938	12.8454	2765	12.8454	2886
12.8519	3255	12.8519	2858	12.8519	2696
12.8583	3460	12.8583	2676	12.8583	3170
12.8648	2981	12.8648	2999	12.8648	3170
12.8713	3370	12.8713	3689	12.8713	2755
12.8777	3770	12.8777	3049	12.8777	3146
12.8842	3612	12.8842	3331	12.8842	3444
12.8907	4599	12.8907	3654	12.8907	3538
12.8971	4220	12.8971	3499	12.8971	3368
12.9036	5404	12.9036	3244	12.9036	3117
12.9101	5467	12.9101	3939	12.9101	3635
12.9166	5308	12.9166	4144	12.9166	3342
12.923	6357	12.923	4118	12.923	3394
12.9295	5915	12.9295	4708	12.9295	3924
12.936	6883	12.936	3860	12.936	3026
12.9424	6181	12.9424	4661	12.9424	3145
12.9489	5485	12.9489	3915	12.9489	3304
12.9553	4819	12.9553	3911	12.9553	3125
12.9618	4882	12.9618	3529	12.9618	2919
12.9683	3940	12.9683	3552	12.9683	3228
12.9748	4459	12.9748	3580	12.9748	3124
12.9812	4025	12.9812	3309	12.9812	2815
12.9877	3828	12.9877	3143	12.9877	2821
12.9942	3807	12.9942	3153	12.9942	2764
13.0006	3578	13.0006	3206	13.0006	2669
13.0071	3173	13.0071	3049	13.0071	2778
13.0136	3734	13.0136	3022	13.0136	2494
13.02	3597	13.02	3062	13.02	3212
13.0265	2858	13.0265	2781	13.0265	2981
13.033	3066	13.033	2660	13.033	2920
13.0395	3330	13.0395	3261	13.0395	3127
13.0459	3411	13.0459	2893	13.0459	3320
13.0524	3128	13.0524	2955	13.0524	2978
13.0588	3120	13.0588	3512	13.0588	3201
13.0653	3215	13.0653	3245	13.0653	2812
13.0718	3597	13.0718	3107	13.0718	2973
13.0783	3019	13.0783	3101	13.0783	2894
13.0847	3471	13.0847	2914	13.0847	2846
13.0912	3284	13.0912	3480	13.0912	2706
13.0977	3286	13.0977	2867	13.0977	2932
13.1041	3267	13.1041	2820	13.1041	3237
13.1106	3087	13.1106	2907	13.1106	3016
13.1171	2932	13.1171	3389	13.1171	2976
13.1235	3617	13.1235	3359	13.1235	2935
13.13	3906	13.13	3247	13.13	2774
13.1365	3510	13.1365	3127	13.1365	2712
13.143	3943	13.143	3496	13.143	2939
13.1494	3664	13.1494	3147	13.1494	3205
13.1559	3413	13.1559	3173	13.1559	3376
13.1623	3590	13.1623	3735	13.1623	3305
13.1688	4480	13.1688	4375	13.1688	3383
13.1753	3704	13.1753	3299	13.1753	3494
13.1817	4027	13.1817	3696	13.1817	2726
13.1882	3795	13.1882	4009	13.1882	2701
13.1947	3547	13.1947	4310	13.1947	2952
13.2012	4039	13.2012	3507	13.2012	3201
13.2076	3997	13.2076	3291	13.2076	3005
13.2141	4155	13.2141	4381	13.2141	3031
13.2206	4857	13.2206	5090	13.2206	3766
13.227	5275	13.227	7971	13.227	4924
13.2335	10030	13.2335	15376	13.2335	9114
13.24	18049	13.24	31575	13.24	19571
13.2464	33335	13.2464	60024	13.2464	37387
13.2529	57198	13.2529	116551	13.2529	70075
13.2594	97917	13.2594	208356	13.2594	125684
13.2659	161581	13.2659	340805	13.2659	204605
13.2723	239895	13.2723	504491	13.2723	301425
13.2788	312700	13.2788	641126	13.2788	402977
13.2852	385043	13.2852	767672	13.2852	478436
13.2917	425114	13.2917	846843	13.2917	508055
13.2982	426445	13.2982	835187	13.2982	499515
13.3047	391797	13.3047	751461	13.3047	450610
13.3111	334175	13.3111	609684	13.3111	361584
13.3176	250158	13.3176	466035	13.3176	278845
13.3241	185101	13.3241	326108	13.3241	191019
13.3305	132857	13.3305	217984	13.3305	125260
13.337	89570	13.337	141933	13.337	79023
13.3435	64110	13.3435	91491	13.3435	51223
13.3499	45287	13.3499	63226	13.3499	34158
13.3564	33314	13.3564	45320	13.3564	22856
13.3629	24500	13.3629	34143	13.3629	16752
13.3694	22258	13.3694	24777	13.3694	13783
13.3758	17994	13.3758	20691	13.3758	12314
13.3823	15465	13.3823	15770	13.3823	9288
13.3887	13555	13.3887	13816	13.3887	8955
13.3952	12023	13.3952	12576	13.3952	7154
13.4017	9714	13.4017	10090	13.4017	7365
13.4082	9584	13.4082	8731	13.4082	6154
13.4146	8915	13.4146	7853	13.4146	6266
13.4211	8512	13.4211	7722	13.4211	5405
13.4276	6671	13.4276	5991	13.4276	5980
13.434	7210	13.434	6645	13.434	5374
13.4405	6600	13.4405	6518	13.4405	5436
13.447	6056	13.447	6048	13.447	5438
13.4534	6255	13.4534	5867	13.4534	6458
13.4599	5687	13.4599	4998	13.4599	5960
13.4664	5871	13.4664	6005	13.4664	6674
13.4728	4872	13.4728	5601	13.4728	6022
13.4793	4876	13.4793	5633	13.4793	4787
13.4858	4418	13.4858	5525	13.4858	4810
13.4923	4804	13.4923	4228	13.4923	4428
13.4987	5043	13.4987	4722	13.4987	4474
13.5052	4791	13.5052	4609	13.5052	3493
13.5117	4452	13.5117	4983	13.5117	3320
13.5181	5821	13.5181	3918	13.5181	3670
13.5246	5389	13.5246	3254	13.5246	3008
13.5311	5996	13.5311	3651	13.5311	3606
13.5375	5500	13.5375	4187	13.5375	3920
13.544	5796	13.544	4487	13.544	3243
13.5505	5886	13.5505	3593	13.5505	3459
13.5569	5252	13.5569	3630	13.5569	2878
13.5634	4873	13.5634	4184	13.5634	2967
13.5699	4728	13.5699	4367	13.5699	3607
13.5763	5154	13.5763	4288	13.5763	3437
13.5828	4406	13.5828	3231	13.5828	2995
13.5893	4493	13.5893	4073	13.5893	4080
13.5958	3936	13.5958	3612	13.5958	3612
13.6022	3600	13.6022	3685	13.6022	3265
13.6087	4140	13.6087	3348	13.6087	3679
13.6151	4066	13.6151	3751	13.6151	3824
13.6216	3998	13.6216	3514	13.6216	3496
13.6281	3316	13.6281	3891	13.6281	3412
13.6346	4581	13.6346	3560	13.6346	3532
13.641	4423	13.641	4610	13.641	3806
13.6475	4069	13.6475	6982	13.6475	3349
13.654	5428	13.654	11867	13.654	3812
13.6604	5816	13.6604	18429	13.6604	3450
13.6669	6547	13.6669	29051	13.6669	4164
13.6734	7481	13.6734	42775	13.6734	4901
13.6799	9665	13.6799	59228	13.6799	7921
13.6863	11475	13.6863	69376	13.6863	9310
13.6928	13789	13.6928	75323	13.6928	9583
13.6992	15126	13.6992	76990	13.6992	12107
13.7057	15876	13.7057	68752	13.7057	11590
13.7122	14155	13.7122	61787	13.7122	11758
13.7187	13760	13.7187	50181	13.7187	12105
13.7251	9638	13.7251	39572	13.7251	8659
13.7316	7822	13.7316	26761	13.7316	7955
13.7381	5726	13.7381	20559	13.7381	7085
13.7445	5300	13.7445	14727	13.7445	5757
13.751	5087	13.751	11017	13.751	4880
13.7575	4310	13.7575	7461	13.7575	5358
13.7639	3623	13.7639	6272	13.7639	4631
13.7704	4085	13.7704	5441	13.7704	4120
13.7769	3625	13.7769	4243	13.7769	4022
13.7833	4020	13.7833	4113	13.7833	4302
13.7898	3669	13.7898	4610	13.7898	3912
13.7963	3969	13.7963	3342	13.7963	3339
13.8027	3985	13.8027	3785	13.8027	4089
13.8092	3752	13.8092	4016	13.8092	4766
13.8157	4387	13.8157	3095	13.8157	6893
13.8222	4054	13.8222	4186	13.8222	9847
13.8286	4670	13.8286	4473	13.8286	13601
13.8351	5597	13.8351	5162	13.8351	20899
13.8416	5799	13.8416	5477	13.8416	29627
13.848	7247	13.848	7031	13.848	39126
13.8545	8188	13.8545	6931	13.8545	48874
13.861	8082	13.861	7804	13.861	56861
13.8674	8619	13.8674	8453	13.8674	58889
13.8739	8768	13.8739	8628	13.8739	55450
13.8804	8867	13.8804	7931	13.8804	47961
13.8868	8017	13.8868	7032	13.8868	39675
13.8933	7675	13.8933	5886	13.8933	30274
13.8998	7993	13.8998	5891	13.8998	21207
13.9062	6041	13.9062	5063	13.9062	13469
13.9127	7227	13.9127	5404	13.9127	9654
13.9192	6911	13.9192	4675	13.9192	7454
13.9256	6818	13.9256	4756	13.9256	5556
13.9321	6458	13.9321	5172	13.9321	5468
13.9386	6576	13.9386	5974	13.9386	5071
13.9451	6614	13.9451	5833	13.9451	4465
13.9515	6333	13.9515	5502	13.9515	5133
13.958	6812	13.958	5462	13.958	5312
13.9645	6936	13.9645	5808	13.9645	5604
13.9709	5939	13.9709	5424	13.9709	5532
13.9774	5625	13.9774	5699	13.9774	4781
13.9839	5322	13.9839	5140	13.9839	4813
13.9903	4482	13.9903	4416	13.9903	4427
13.9968	3784	13.9968	3531	13.9968	3936
14.0033	4029	14.0033	3744	14.0033	3076
14.0098	3455	14.0098	3849	14.0098	3085
14.0162	2968	14.0162	3360	14.0162	3185
14.0227	3134	14.0227	3134	14.0227	3403
14.0291	4180	14.0291	3261	14.0291	3020
14.0356	3497	14.0356	3791	14.0356	3951
14.0421	4147	14.0421	5198	14.0421	4285
14.0486	3896	14.0486	3689	14.0486	5207
14.055	4662	14.055	5490	14.055	5279
14.0615	4255	14.0615	6521	14.0615	5978
14.068	4392	14.068	5880	14.068	7011
14.0744	4833	14.0744	5398	14.0744	7419
14.0809	4286	14.0809	5571	14.0809	5316
14.0874	3829	14.0874	5211	14.0874	6496
14.0938	4091	14.0938	4327	14.0938	5544
14.1003	5075	14.1003	4871	14.1003	5836
14.1068	4366	14.1068	4117	14.1068	6219
14.1133	4489	14.1133	4293	14.1133	4922
14.1197	4102	14.1197	3896	14.1197	5147
14.1262	4762	14.1262	3212	14.1262	4693
14.1326	4428	14.1326	3618	14.1326	4384
14.1391	3055	14.1391	3147	14.1391	3721
14.1456	3747	14.1456	3338	14.1456	3474
14.152	3293	14.152	3856	14.152	3024
14.1585	3535	14.1585	3178	14.1585	2623
14.165	3636	14.165	2800	14.165	2817
14.1715	3223	14.1715	2490	14.1715	3763
14.1779	3449	14.1779	3183	14.1779	3053
14.1844	3130	14.1844	3122	14.1844	2761
14.1909	3087	14.1909	3186	14.1909	3351
14.1973	3315	14.1973	3189	14.1973	3586
14.2038	2922	14.2038	3464	14.2038	3725
14.2103	3308	14.2103	3308	14.2103	3191
14.2167	3245	14.2167	2904	14.2167	3642
14.2232	3526	14.2232	3137	14.2232	3566
14.2297	3049	14.2297	2879	14.2297	3657
14.2362	3090	14.2362	3239	14.2362	3100
14.2426	3149	14.2426	3563	14.2426	3616
14.2491	3617	14.2491	3113	14.2491	3183
14.2555	3507	14.2555	3061	14.2555	2763
14.262	2886	14.262	2944	14.262	2952
14.2685	3294	14.2685	2947	14.2685	3549
14.275	2842	14.275	3397	14.275	3062
14.2814	3328	14.2814	3184	14.2814	3582
14.2879	3308	14.2879	3855	14.2879	3499
14.2944	3805	14.2944	4702	14.2944	3762
14.3008	4429	14.3008	6736	14.3008	5550
14.3073	4976	14.3073	8206	14.3073	4660
14.3138	5880	14.3138	9046	14.3138	5964
14.3202	6451	14.3202	9788	14.3202	7349
14.3267	6286	14.3267	10143	14.3267	7158
14.3332	6843	14.3332	9808	14.3332	6087
14.3397	5410	14.3397	9156	14.3397	6316
14.3461	5293	14.3461	9006	14.3461	4616
14.3526	4889	14.3526	6739	14.3526	4981
14.359	4767	14.359	5293	14.359	4333
14.3655	4098	14.3655	5050	14.3655	4053
14.372	3396	14.372	4215	14.372	3465
14.3785	3227	14.3785	4267	14.3785	4102
14.3849	3108	14.3849	4295	14.3849	4346
14.3914	3615	14.3914	3763	14.3914	3602
14.3979	3715	14.3979	3306	14.3979	3573
14.4043	4854	14.4043	3613	14.4043	3811
14.4108	4506	14.4108	3384	14.4108	4708
14.4173	5230	14.4173	3501	14.4173	4441
14.4237	5277	14.4237	3523	14.4237	5102
14.4302	5852	14.4302	3416	14.4302	4700
14.4367	5490	14.4367	3556	14.4367	4299
14.4431	5612	14.4431	3748	14.4431	3736
14.4496	6694	14.4496	3606	14.4496	4264
14.4561	5013	14.4561	3325	14.4561	3563
14.4626	5259	14.4626	3443	14.4626	4487
14.469	5326	14.469	3131	14.469	3765
14.4755	5503	14.4755	3469	14.4755	4136
14.4819	5299	14.4819	3850	14.4819	4209
14.4884	5244	14.4884	3682	14.4884	3845
14.4949	5722	14.4949	3682	14.4949	4051
14.5014	5849	14.5014	3954	14.5014	4744
14.5078	4682	14.5078	2999	14.5078	4471
14.5143	6036	14.5143	3293	14.5143	4644
14.5208	5353	14.5208	3179	14.5208	5577
14.5272	5441	14.5272	3146	14.5272	5592
14.5337	4853	14.5337	4081	14.5337	4833
14.5402	5865	14.5402	4060	14.5402	4422
14.5466	5250	14.5466	3447	14.5466	4643
14.5531	5710	14.5531	3824	14.5531	4475
14.5596	5748	14.5596	3239	14.5596	4886
14.5661	4990	14.5661	3049	14.5661	4665
14.5725	4785	14.5725	3696	14.5725	4843
14.579	5240	14.579	4316	14.579	4491
14.5854	5285	14.5854	3338	14.5854	5183
14.5919	5258	14.5919	3638	14.5919	5970
14.5984	5336	14.5984	4431	14.5984	5859
14.6049	5379	14.6049	4605	14.6049	7123
14.6113	7201	14.6113	4247	14.6113	7732
14.6178	6216	14.6178	4172	14.6178	7747
14.6243	6224	14.6243	3876	14.6243	7958
14.6307	5934	14.6307	4321	14.6307	8261
14.6372	6865	14.6372	4937	14.6372	7902
14.6437	5790	14.6437	4073	14.6437	7412
14.6501	6710	14.6501	3845	14.6501	7610
14.6566	6299	14.6566	4062	14.6566	6499
14.6631	5431	14.6631	3871	14.6631	6030
14.6695	5431	14.6695	3922	14.6695	6040
14.676	5273	14.676	3377	14.676	4774
14.6825	4947	14.6825	4117	14.6825	4362
14.689	3932	14.689	3455	14.689	4511
14.6954	4589	14.6954	3421	14.6954	3569
14.7019	4220	14.7019	3821	14.7019	3698
14.7083	4423	14.7083	4013	14.7083	3988
14.7148	5397	14.7148	3326	14.7148	4561
14.7213	6290	14.7213	3793	14.7213	5425
14.7278	6407	14.7278	4593	14.7278	5975
14.7342	7125	14.7342	4581	14.7342	7133
14.7407	7461	14.7407	5243	14.7407	6965
14.7472	7865	14.7472	5518	14.7472	8164
14.7536	7691	14.7536	4623	14.7536	6935
14.7601	6342	14.7601	4474	14.7601	6565
14.7666	5167	14.7666	4154	14.7666	6168
14.773	5807	14.773	4147	14.773	4908
14.7795	4780	14.7795	3515	14.7795	4104
14.786	4392	14.786	3710	14.786	3641
14.7925	3582	14.7925	3649	14.7925	4213
14.7989	3315	14.7989	3705	14.7989	3129
14.8054	4737	14.8054	3126	14.8054	3266
14.8118	4242	14.8118	3945	14.8118	3415
14.8183	4107	14.8183	3587	14.8183	3268
14.8248	4393	14.8248	3588	14.8248	3425
14.8313	4357	14.8313	3705	14.8313	3606
14.8377	3913	14.8377	3764	14.8377	3680
14.8442	4475	14.8442	3654	14.8442	3660
14.8507	4473	14.8507	3489	14.8507	3511
14.8571	3861	14.8571	3941	14.8571	3431
14.8636	3346	14.8636	3227	14.8636	3879
14.8701	4110	14.8701	2916	14.8701	3646
14.8765	4072	14.8765	3658	14.8765	3628
14.883	3949	14.883	3134	14.883	2872
14.8895	3527	14.8895	3821	14.8895	4075
14.8959	3390	14.8959	2945	14.8959	3910
14.9024	4906	14.9024	3413	14.9024	3681
14.9089	3629	14.9089	3034	14.9089	4479
14.9154	4091	14.9154	3197	14.9154	4153
14.9218	3977	14.9218	3210	14.9218	4529
14.9283	3811	14.9283	3493	14.9283	3968
14.9348	3720	14.9348	3129	14.9348	4153
14.9412	3075	14.9412	3605	14.9412	4029
14.9477	4258	14.9477	3346	14.9477	3169
14.9542	3679	14.9542	3298	14.9542	3565
14.9606	3767	14.9606	3480	14.9606	3464
14.9671	3692	14.9671	3048	14.9671	2692
14.9736	3190	14.9736	3259	14.9736	3104
14.98	3320	14.98	3104	14.98	2799
14.9865	3581	14.9865	3372	14.9865	2833
14.993	3784	14.993	2820	14.993	3003
14.9994	3174	14.9994	3366	14.9994	3236
15.0059	3630	15.0059	3312	15.0059	2969
15.0124	3765	15.0124	3264	15.0124	2909
15.0189	3946	15.0189	3376	15.0189	2745
15.0253	3073	15.0253	3498	15.0253	3260
15.0318	3558	15.0318	2774	15.0318	2828
15.0382	3236	15.0382	3377	15.0382	3128
15.0447	3311	15.0447	3163	15.0447	2768
15.0512	3952	15.0512	3367	15.0512	3033
15.0577	3239	15.0577	2891	15.0577	2916
15.0641	3823	15.0641	2774	15.0641	3741
15.0706	3740	15.0706	3451	15.0706	3153
15.0771	3413	15.0771	3282	15.0771	3574
15.0835	3116	15.0835	3225	15.0835	3319
15.09	3223	15.09	3376	15.09	3388
15.0965	3642	15.0965	3359	15.0965	3599
15.1029	3329	15.1029	3132	15.1029	2554
15.1094	3386	15.1094	3029	15.1094	3165
15.1159	3615	15.1159	3296	15.1159	2964
15.1224	3458	15.1224	3164	15.1224	2955
15.1288	3246	15.1288	3463	15.1288	2899
15.1353	3564	15.1353	3011	15.1353	2970
15.1418	3837	15.1418	2739	15.1418	2709
15.1482	3576	15.1482	3147	15.1482	3358
15.1547	3970	15.1547	3088	15.1547	3009
15.1612	3249	15.1612	3181	15.1612	3176
15.1676	3759	15.1676	3248	15.1676	2628
15.1741	3729	15.1741	3299	15.1741	3453
15.1806	3666	15.1806	3080	15.1806	3031
15.187	3859	15.187	3259	15.187	3628
15.1935	3274	15.1935	2913	15.1935	3204
15.2	3331	15.2	2960	15.2	3406
15.2064	3464	15.2064	3062	15.2064	3714
15.2129	3116	15.2129	3036	15.2129	3800
15.2194	2941	15.2194	3289	15.2194	3806
15.2258	3472	15.2258	3579	15.2258	2896
15.2323	2950	15.2323	3024	15.2323	2947
15.2388	3197	15.2388	3229	15.2388	2805
15.2453	2974	15.2453	3231	15.2453	2914
15.2517	3166	15.2517	3188	15.2517	3008
15.2582	3435	15.2582	2647	15.2582	3446
15.2647	3760	15.2647	3403	15.2647	2721
15.2711	3515	15.2711	3437	15.2711	2984
15.2776	3177	15.2776	2864	15.2776	2545
15.2841	3007	15.2841	2952	15.2841	2708
15.2905	2974	15.2905	2710	15.2905	3165
15.297	3661	15.297	3328	15.297	3579
15.3035	3936	15.3035	3276	15.3035	3095
15.3099	3558	15.3099	3046	15.3099	2943
15.3164	3319	15.3164	3259	15.3164	2878
15.3229	3862	15.3229	3605	15.3229	3178
15.3293	3691	15.3293	4248	15.3293	3674
15.3358	3339	15.3358	4611	15.3358	4121
15.3423	4826	15.3423	6743	15.3423	4752
15.3488	5260	15.3488	6775	15.3488	4486
15.3552	6537	15.3552	8549	15.3552	5036
15.3617	5876	15.3617	9745	15.3617	6125
15.3681	6601	15.3681	10149	15.3681	6373
15.3746	6647	15.3746	10225	15.3746	6429
15.3811	5689	15.3811	10289	15.3811	5378
15.3876	5283	15.3876	8706	15.3876	5613
15.394	4772	15.394	6825	15.394	4221
15.4005	4626	15.4005	6416	15.4005	4025
15.407	3955	15.407	5002	15.407	4150
15.4134	3905	15.4134	4250	15.4134	2905
15.4199	4637	15.4199	3813	15.4199	3366
15.4264	3327	15.4264	3842	15.4264	3624
15.4329	3630	15.4329	2962	15.4329	2842
15.4393	2902	15.4393	3002	15.4393	2913
15.4458	3579	15.4458	3140	15.4458	3120
15.4522	3205	15.4522	2939	15.4522	2802
15.4587	3194	15.4587	3686	15.4587	2970
15.4652	3362	15.4652	2879	15.4652	3298
15.4717	3371	15.4717	3156	15.4717	3042
15.4781	4027	15.4781	2930	15.4781	3365
15.4846	2783	15.4846	3382	15.4846	3120
15.4911	3283	15.4911	3177	15.4911	2935
15.4975	2971	15.4975	2616	15.4975	2736
15.504	2991	15.504	2633	15.504	2892
15.5105	3354	15.5105	3250	15.5105	2872
15.5169	3509	15.5169	3115	15.5169	2752
15.5234	2876	15.5234	3503	15.5234	3169
15.5299	3501	15.5299	3321	15.5299	3078
15.5364	3971	15.5364	3372	15.5364	3820
15.5428	3867	15.5428	3609	15.5428	4494
15.5493	3881	15.5493	3463	15.5493	4348
15.5557	4087	15.5557	2912	15.5557	4061
15.5622	4646	15.5622	3515	15.5622	4682
15.5687	4297	15.5687	3508	15.5687	4821
15.5752	4023	15.5752	3715	15.5752	4372
15.5816	3839	15.5816	3460	15.5816	3922
15.5881	3879	15.5881	3890	15.5881	3245
15.5946	3541	15.5946	3819	15.5946	3114
15.601	4026	15.601	3710	15.601	2982
15.6075	3284	15.6075	3729	15.6075	2814
15.614	3261	15.614	3479	15.614	3066
15.6204	3168	15.6204	3456	15.6204	3111
15.6269	3563	15.6269	2955	15.6269	3219
15.6334	3171	15.6334	3451	15.6334	3363
15.6398	2835	15.6398	3128	15.6398	2489
15.6463	3095	15.6463	3085	15.6463	2881
15.6528	2968	15.6528	2922	15.6528	3324
15.6593	3262	15.6593	3088	15.6593	2608
15.6657	3154	15.6657	3100	15.6657	3069
15.6722	3061	15.6722	3325	15.6722	3042
15.6786	2968	15.6786	2776	15.6786	3171
15.6851	3559	15.6851	2772	15.6851	2636
15.6916	3278	15.6916	3059	15.6916	3004
15.6981	3669	15.6981	3120	15.6981	2411
15.7045	3141	15.7045	3258	15.7045	3605
15.711	3224	15.711	2897	15.711	2739
15.7175	3067	15.7175	3197	15.7175	2847
15.7239	3650	15.7239	2905	15.7239	3433
15.7304	2680	15.7304	3132	15.7304	3653
15.7369	3053	15.7369	3134	15.7369	3562
15.7433	3049	15.7433	3284	15.7433	3465
15.7498	3556	15.7498	3081	15.7498	3305
15.7563	2901	15.7563	2991	15.7563	3370
15.7628	3369	15.7628	3510	15.7628	3178
15.7692	3030	15.7692	3039	15.7692	2999
15.7757	2636	15.7757	3477	15.7757	3090
15.7821	2950	15.7821	3169	15.7821	2952
15.7886	3405	15.7886	2619	15.7886	2935
15.7951	2907	15.7951	3185	15.7951	3370
15.8016	2934	15.8016	3160	15.8016	2794
15.808	2910	15.808	2830	15.808	2994
15.8145	3178	15.8145	2844	15.8145	3003
15.821	3103	15.821	3498	15.821	3547
15.8274	3218	15.8274	3035	15.8274	2995
15.8339	3066	15.8339	3304	15.8339	3040
15.8404	3177	15.8404	2953	15.8404	3876
15.8468	3411	15.8468	2884	15.8468	2985
15.8533	3502	15.8533	3021	15.8533	3419
15.8598	3324	15.8598	2601	15.8598	3891
15.8663	3407	15.8663	3116	15.8663	3893
15.8727	3851	15.8727	3051	15.8727	3571
15.8792	2813	15.8792	3002	15.8792	3931
15.8857	2884	15.8857	3082	15.8857	3508
15.8921	3005	15.8921	3549	15.8921	3719
15.8986	3112	15.8986	3018	15.8986	3012
15.905	3265	15.905	3261	15.905	3147
15.9115	2833	15.9115	3251	15.9115	2713
15.918	3335	15.918	3270	15.918	2900
15.9245	3086	15.9245	3167	15.9245	2818
15.9309	3235	15.9309	3136	15.9309	2676
15.9374	2949	15.9374	3293	15.9374	2785
15.9439	2940	15.9439	3014	15.9439	2780
15.9503	2473	15.9503	2989	15.9503	3125
15.9568	3143	15.9568	3272	15.9568	3255
15.9633	2618	15.9633	2801	15.9633	2655
15.9697	3163	15.9697	3077	15.9697	2783
15.9762	3288	15.9762	3137	15.9762	3087
15.9827	3172	15.9827	3283	15.9827	2989
15.9892	4542	15.9892	2962	15.9892	3049
15.9956	4017	15.9956	3470	15.9956	3014
16.0021	4964	16.0021	2694	16.0021	2820
16.0085	5467	16.0085	3222	16.0085	3005
16.015	4718	16.015	3453	16.015	2977
16.0215	5853	16.0215	2994	16.0215	3075
16.028	5271	16.028	2908	16.028	2837
16.0344	4204	16.0344	3115	16.0344	3114
16.0409	3769	16.0409	2950	16.0409	3117
16.0474	3836	16.0474	3068	16.0474	2962
16.0538	3374	16.0538	2749	16.0538	2862
16.0603	3414	16.0603	3234	16.0603	3111
16.0668	3117	16.0668	3144	16.0668	2951
16.0732	3511	16.0732	3359	16.0732	2538
16.0797	2821	16.0797	3102	16.0797	2684
16.0862	3310	16.0862	3301	16.0862	3251
16.0926	2742	16.0926	3095	16.0926	3816
16.0991	3146	16.0991	2934	16.0991	3261
16.1056	3311	16.1056	2675	16.1056	3233
16.112	3204	16.112	3029	16.112	3400
16.1185	3009	16.1185	3241	16.1185	3717
16.125	2872	16.125	3185	16.125	4327
16.1315	3246	16.1315	3954	16.1315	4734
16.1379	2885	16.1379	3464	16.1379	5026
16.1444	3244	16.1444	3921	16.1444	4523
16.1509	3414	16.1509	3677	16.1509	5556
16.1573	2995	16.1573	4100	16.1573	4584
16.1638	3034	16.1638	4129	16.1638	4368
16.1703	3632	16.1703	3274	16.1703	3492
16.1767	3672	16.1767	2785	16.1767	3729
16.1832	3271	16.1832	2998	16.1832	3518
16.1897	2834	16.1897	3202	16.1897	2919
16.1961	3111	16.1961	3091	16.1961	3057
16.2026	2541	16.2026	3286	16.2026	3207
16.2091	2275	16.2091	3203	16.2091	3241
16.2156	2863	16.2156	3550	16.2156	3251
16.222	3203	16.222	3458	16.222	2587
16.2285	2680	16.2285	3097	16.2285	3245
16.235	3149	16.235	3366	16.235	3054
16.2414	3504	16.2414	3019	16.2414	2605
16.2479	3455	16.2479	3180	16.2479	2959
16.2544	2716	16.2544	2972	16.2544	2990
16.2608	3179	16.2608	3021	16.2608	2714
16.2673	2701	16.2673	3291	16.2673	3171
16.2738	2958	16.2738	3115	16.2738	2733
16.2802	3337	16.2802	2822	16.2802	3047
16.2867	3059	16.2867	3189	16.2867	2749
16.2932	3156	16.2932	2621	16.2932	3067
16.2996	2845	16.2996	2725	16.2996	2876
16.3061	2873	16.3061	2942	16.3061	2597
16.3126	3037	16.3126	2851	16.3126	2996
16.3191	2928	16.3191	2876	16.3191	2673
16.3255	3362	16.3255	3369	16.3255	2877
16.332	2961	16.332	3350	16.332	2594
16.3385	3128	16.3385	3291	16.3385	2699
16.3449	2857	16.3449	3022	16.3449	3069
16.3514	2823	16.3514	3308	16.3514	3343
16.3579	3420	16.3579	3024	16.3579	2981
16.3643	2893	16.3643	3040	16.3643	3021
16.3708	2917	16.3708	2698	16.3708	3034
16.3773	2759	16.3773	3499	16.3773	2973
16.3837	3058	16.3837	3298	16.3837	2968
16.3902	3417	16.3902	3284	16.3902	3447
16.3967	2821	16.3967	2681	16.3967	3136
16.4031	3019	16.4031	2986	16.4031	3249
16.4096	2944	16.4096	3054	16.4096	2885
16.4161	2964	16.4161	3343	16.4161	3217
16.4226	2789	16.4226	3076	16.4226	2678
16.429	3106	16.429	2822	16.429	3004
16.4355	3036	16.4355	3120	16.4355	2710
16.4419	2954	16.4419	3184	16.4419	3102
16.4484	3103	16.4484	3253	16.4484	3020
16.4549	3147	16.4549	3194	16.4549	3113
16.4613	3251	16.4613	3145	16.4613	2737
16.4678	2778	16.4678	3222	16.4678	2920
16.4743	3380	16.4743	3577	16.4743	3071
16.4808	3090	16.4808	3323	16.4808	2899
16.4872	3184	16.4872	2918	16.4872	3345
16.4937	3289	16.4937	2773	16.4937	3066
16.5002	2838	16.5002	3180	16.5002	3209
16.5066	2917	16.5066	2950	16.5066	2932
16.5131	2815	16.5131	2536	16.5131	3105
16.5196	3067	16.5196	3081	16.5196	2615
16.5261	2870	16.5261	3140	16.5261	2720
16.5325	3315	16.5325	3020	16.5325	2755
16.539	2965	16.539	3379	16.539	3013
16.5454	3136	16.5454	3127	16.5454	2802
16.5519	2996	16.5519	3469	16.5519	2731
16.5584	3493	16.5584	3571	16.5584	2998
16.5648	3290	16.5648	3142	16.5648	2550
16.5713	3617	16.5713	3736	16.5713	2457
16.5778	4783	16.5778	4978	16.5778	4298
16.5843	12157	16.5843	10179	16.5843	8304
16.5907	31901	16.5907	30094	16.5907	22212
16.5972	76537	16.5972	73162	16.5972	54760
16.6037	167318	16.6037	165711	16.6037	132372
16.6101	347419	16.6101	329942	16.6101	277020
16.6166	622887	16.6166	595996	16.6166	514842
16.6231	1033334	16.6231	995533	16.6231	872613
16.6295	1548669	16.6295	1495298	16.6295	1332556
16.636	2130367	16.636	2093593	16.636	1859051
16.6425	2813953	16.6425	2790863	16.6425	2512365
16.6489	3556614	16.6489	3466627	16.6489	3204586
16.6554	4293825	16.6554	4200028	16.6554	3909013
16.6619	5122561	16.6619	4940239	16.6619	4544466
16.6684	5855628	16.6684	5795442	16.6684	5254045
16.6748	6530789	16.6748	6631846	16.6748	6020131
16.6813	7327202	16.6813	7400909	16.6813	6698369
16.6878	8061076	16.6878	8038198	16.6878	7009436
16.6942	8605236	16.6942	8757703	16.6942	7135801
16.7007	9191528	16.7007	9625672	16.7007	6572797
16.7072	9423619	16.7072	10210500	16.7072	5423146
16.7136	9182973	16.7136	10824700	16.7136	3929464
16.7201	8328194	16.7201	11482200	16.7201	2656108
16.7266	6310820	16.7266	12230500	16.7266	1756894
16.733	3858938	16.733	12697700	16.733	1264369
16.7395	2268230	16.7395	13440200	16.7395	1032694
16.746	1485249	16.746	14125700	16.746	895180
16.7524	1155678	16.7524	14775000	16.7524	813526
16.7589	1002960	16.7589	15241800	16.7589	761684
16.7654	918154	16.7654	16088500	16.7654	705820
16.7719	872952	16.7719	16778800	16.7719	660854
16.7783	835092	16.7783	17354800	16.7783	623419
16.7848	782672	16.7848	17486100	16.7848	616493
16.7913	736212	16.7913	15830600	16.7913	592139
16.7977	709513	16.7977	10199700	16.7977	581325
16.8042	683953	16.8042	3952291	16.8042	558384
16.8107	640602	16.8107	1514474	16.8107	537735
16.8171	625595	16.8171	933339	16.8171	521571
16.8236	613843	16.8236	803024	16.8236	513850
16.8301	582972	16.8301	752636	16.8301	483466
16.8365	564072	16.8365	731610	16.8365	452777
16.843	537136	16.843	692472	16.843	431992
16.8495	525223	16.8495	675640	16.8495	412418
16.8559	505812	16.8559	644440	16.8559	398226
16.8624	491049	16.8624	614517	16.8624	376230
16.8689	478491	16.8689	600614	16.8689	368938
16.8754	465359	16.8754	580218	16.8754	351052
16.8818	447642	16.8818	567445	16.8818	341456
16.8883	440946	16.8883	548946	16.8883	332077
16.8947	421141	16.8947	518797	16.8947	320039
16.9012	408542	16.9012	500496	16.9012	311648
16.9077	397554	16.9077	480925	16.9077	306372
16.9142	392296	16.9142	471621	16.9142	303170
16.9206	381258	16.9206	475347	16.9206	293881
16.9271	376613	16.9271	453929	16.9271	284081
16.9336	363642	16.9336	440367	16.9336	280896
16.94	354088	16.94	431123	16.94	273660
16.9465	346955	16.9465	413665	16.9465	269001
16.953	342666	16.953	407607	16.953	266075
16.9595	340790	16.9595	407973	16.9595	259232
16.9659	331215	16.9659	388894	16.9659	252439
16.9724	321240	16.9724	381773	16.9724	244558
16.9789	324057	16.9789	371104	16.9789	239502
16.9853	317711	16.9853	364554	16.9853	235631
16.9918	307620	16.9918	359064	16.9918	232234
16.9982	303329	16.9982	353361	16.9982	233917
17.0047	294494	17.0047	335473	17.0047	227595
17.0112	298644	17.0112	343973	17.0112	229543
17.0177	294953	17.0177	336794	17.0177	223207
17.0241	281943	17.0241	317968	17.0241	225053
17.0306	278306	17.0306	315438	17.0306	220764
17.0371	275140	17.0371	308522	17.0371	216272
17.0435	263859	17.0435	305568	17.0435	215630
17.05	265706	17.05	306543	17.05	215808
17.0565	259007	17.0565	297576	17.0565	209031
17.0629	255797	17.0629	300310	17.0629	203554
17.0694	246229	17.0694	292048	17.0694	197742
17.0759	236909	17.0759	283245	17.0759	198813
17.0824	237617	17.0824	276702	17.0824	190926
17.0888	245141	17.0888	269763	17.0888	185101
17.0953	229186	17.0953	261790	17.0953	177689
17.1017	223254	17.1017	251716	17.1017	172255
17.1082	215785	17.1082	239629	17.1082	168939
17.1147	203334	17.1147	229198	17.1147	164522
17.1212	185450	17.1212	209641	17.1212	155903
17.1276	171292	17.1276	196498	17.1276	144468
17.1341	156289	17.1341	172161	17.1341	129359
17.1406	136485	17.1406	154086	17.1406	112294
17.147	122004	17.147	138946	17.147	98612
17.1535	106005	17.1535	116130	17.1535	85965
17.16	93509	17.16	103318	17.16	76722
17.1664	84130	17.1664	89322	17.1664	65951
17.1729	76830	17.1729	79940	17.1729	59394
17.1794	67469	17.1794	68239	17.1794	53090
17.1858	63092	17.1858	63447	17.1858	53384
17.1923	68393	17.1923	58680	17.1923	67626
17.1988	82664	17.1988	57813	17.1988	97892
17.2052	115236	17.2052	56887	17.2052	159064
17.2117	180726	17.2117	67308	17.2117	274898
17.2182	288748	17.2182	84837	17.2182	456582
17.2247	444770	17.2247	133508	17.2247	715972
17.2311	637311	17.2311	210078	17.2311	1065052
17.2376	860237	17.2376	334538	17.2376	1485619
17.2441	1052858	17.2441	515714	17.2441	1942930
17.2505	1213479	17.2505	724027	17.2505	2397086
17.257	1274186	17.257	943033	17.257	2861413
17.2635	1210219	17.2635	1136381	17.2635	3124356
17.2699	1100881	17.2699	1281544	17.2699	3252933
17.2764	912991	17.2764	1303104	17.2764	3070456
17.2829	706917	17.2829	1208831	17.2829	2633505
17.2893	495428	17.2893	1035912	17.2893	2017499
17.2958	346383	17.2958	809114	17.2958	1379364
17.3023	223376	17.3023	577480	17.3023	846431
17.3087	149036	17.3087	386337	17.3087	497489
17.3152	102220	17.3152	251823	17.3152	281194
17.3217	72842	17.3217	160586	17.3217	163641
17.3282	57616	17.3282	101864	17.3282	99224
17.3346	47721	17.3346	72896	17.3346	66645
17.3411	44026	17.3411	54173	17.3411	53603
17.3476	38975	17.3476	45878	17.3476	45646
17.354	37438	17.354	41959	17.354	40691
17.3605	36647	17.3605	36293	17.3605	37104
17.367	34396	17.367	34119	17.367	34157
17.3734	33062	17.3734	34408	17.3734	30935
17.3799	31136	17.3799	30740	17.3799	30342
17.3864	28558	17.3864	31161	17.3864	28082
17.3928	27959	17.3928	29452	17.3928	27004
17.3993	27396	17.3993	28493	17.3993	26903
17.4058	26727	17.4058	27739	17.4058	25103
17.4123	26575	17.4123	26613	17.4123	23343
17.4187	24725	17.4187	26549	17.4187	23426
17.4252	25881	17.4252	26093	17.4252	22930
17.4317	22436	17.4317	25884	17.4317	21247
17.4381	22615	17.4381	26025	17.4381	22328
17.4446	23484	17.4446	23998	17.4446	21075
17.4511	22255	17.4511	24380	17.4511	19469
17.4575	22980	17.4575	21908	17.4575	19915
17.464	21782	17.464	21747	17.464	19554
17.4705	21074	17.4705	21884	17.4705	17547
17.4769	21032	17.4769	20823	17.4769	18269
17.4834	21755	17.4834	20453	17.4834	17409
17.4899	21093	17.4899	20491	17.4899	17237
17.4963	20066	17.4963	19660	17.4963	17433
17.5028	19446	17.5028	20239	17.5028	17188
17.5093	19148	17.5093	19096	17.5093	17720
17.5158	18357	17.5158	19881	17.5158	14936
17.5222	18903	17.5222	18742	17.5222	15667
17.5287	18487	17.5287	19154	17.5287	15651
17.5352	18104	17.5352	19105	17.5352	15700
17.5416	17083	17.5416	17489	17.5416	13463
17.5481	18298	17.5481	18842	17.5481	14084
17.5545	17364	17.5545	16731	17.5545	13758
17.561	16483	17.561	18335	17.561	14965
17.5675	16906	17.5675	16574	17.5675	14173
17.574	16514	17.574	16639	17.574	14518
17.5804	16922	17.5804	15834	17.5804	14109
17.5869	15911	17.5869	15986	17.5869	12969
17.5934	16041	17.5934	14951	17.5934	11638
17.5998	15047	17.5998	16814	17.5998	13284
17.6063	16404	17.6063	15399	17.6063	11532
17.6128	17185	17.6128	14308	17.6128	12076
17.6193	15224	17.6193	15777	17.6193	11872
17.6257	14612	17.6257	15140	17.6257	13024
17.6322	15351	17.6322	15214	17.6322	12763
17.6386	15026	17.6386	14567	17.6386	12979
17.6451	13314	17.6451	15303	17.6451	12477
17.6516	14427	17.6516	16819	17.6516	11247
17.658	14075	17.658	15648	17.658	11913
17.6645	13983	17.6645	15037	17.6645	11361
17.671	13610	17.671	13755	17.671	11683
17.6775	13572	17.6775	14602	17.6775	12259
17.6839	13795	17.6839	14215	17.6839	11569
17.6904	14052	17.6904	14490	17.6904	11625
17.6969	13447	17.6969	14392	17.6969	10499
17.7033	13329	17.7033	12302	17.7033	10301
17.7098	13668	17.7098	13408	17.7098	10990
17.7163	12716	17.7163	12711	17.7163	10969
17.7227	12836	17.7227	12440	17.7227	11863
17.7292	11789	17.7292	12480	17.7292	10420
17.7357	12390	17.7357	13248	17.7357	10993
17.7421	12859	17.7421	12905	17.7421	10536
17.7486	12134	17.7486	12493	17.7486	10604
17.7551	11424	17.7551	12746	17.7551	9534
17.7615	12162	17.7615	12298	17.7615	8758
17.768	11140	17.768	11971	17.768	8862
17.7745	11517	17.7745	11812	17.7745	9335
17.781	11358	17.781	11402	17.781	8767
17.7874	13264	17.7874	11010	17.7874	11013
17.7939	11444	17.7939	10656	17.7939	14060
17.8004	13599	17.8004	10248	17.8004	20093
17.8068	13522	17.8068	12272	17.8068	38452
17.8133	15755	17.8133	15461	17.8133	70469
17.8198	23340	17.8198	17948	17.8198	130054
17.8262	32005	17.8262	25723	17.8262	230547
17.8327	44750	17.8327	40349	17.8327	372252
17.8392	61532	17.8392	59788	17.8392	557587
17.8456	79303	17.8456	83794	17.8456	767803
17.8521	101715	17.8521	107615	17.8521	995856
17.8586	121457	17.8586	131803	17.8586	1191196
17.8651	129049	17.8651	157882	17.8651	1288183
17.8715	130404	17.8715	163789	17.8715	1295247
17.878	121897	17.878	159963	17.878	1201803
17.8845	106898	17.8845	145974	17.8845	1007881
17.8909	88411	17.8909	126281	17.8909	790090
17.8974	70856	17.8974	100414	17.8974	568332
17.9039	56950	17.9039	80731	17.9039	383841
17.9103	43842	17.9103	60958	17.9103	253067
17.9168	34852	17.9168	45520	17.9168	165528
17.9233	27712	17.9233	36921	17.9233	107661
[truncated: 3,412 more rows]

## Sheet: Fig.2c
The raw data and results used to generate the Venn diagrams, illustrating the number of volatiles identified across different floral tissues, are provided below. These diagrams highlight the shared and unique volatile compounds among the tissues analyzed.
Petal	Stamen	Receptacle		Result
3-Thujene	3-Thujene	3-Thujene		1	10	11	100	101	110	111
1R-α-Pinene	1R-α-Pinene	1R-α-Pinene		Camphene	Copaene	β-cis-Ocimene	(E)-β-Famesene		(+)-2-Carene	3-Thujene
Camphene	Sabinen	Sabinen		Undecane	(-)-β-Elemene	γ-Muurolene	δ-Selinene		cis-2-p-Menthen-1-ol	1R-α-Pinene
Sabinen	β-Pinene	β-Pinene		Dodecane	γ-Gurjunene	(E)-4-Tetradecene	Butanoic acid, 2-methyl-, ethyl ester		α-Cyclogeraniol	Sabinen
β-Pinene	β-Myrcene	β-Myrcene		(Z)-3-Hexadecene	(+)-Bicyclogermacrene	(Z)-7-Hexadecene	Butyric acid, 2-hydroxy-3-methyl-, methyl ester		cis-β-Farnesene	β-Pinene
β-Myrcene	(+)-2-Carene	(+)-2-Carene			γ-Cadinene	Cetene	Nonane		δ-Guaiene	β-Myrcene
α-Phellandrene	α-Phellandrene	α-Phellandrene			α-Cadinene	Hexadecane			α-epi-Cadinol	α-Phellandrene
α-Terpinene	α-Terpinene	α-Terpinene			α-Cadinol				α-Eudesmol	α-Terpinene
D-Limonene	D-Limonene	D-Limonene			1-Butanol, 3-methyl-, acetate				1-Hexanol	D-Limonene
Eucalyptol	Eucalyptol	Eucalyptol							1-Cyclohexene-1-carboxylic acid, 2,6,6-trimethyl-, methyl ester	Eucalyptol
β-cis-Ocimene	β-cis-Ocimene	γ-Terpinene								γ-Terpinene
γ-Terpinene	γ-Terpinene	Terpinolene								Terpinolene
Terpinolene	Terpinolene	cis-2-p-Menthen-1-ol								Terpinen-4-ol
Terpinen-4-ol	cis-2-p-Menthen-1-ol	Terpinen-4-ol								α-Terpineol
α-Terpineol	Terpinen-4-ol	α-Terpineol								Caryophyllene
Caryophyllene	α-Terpineol	α-Cyclogeraniol								Humulene
Humulene	α-Cyclogeraniol	Caryophyllene								Germacrene D
γ-Muurolene	Copaene	cis-β-Farnesene								δ-Cadinene
Germacrene D	(-)-β-Elemene	Humulene								Caryophyllene oxide
δ-Cadinene	Caryophyllene	(E)-β-Famesene								γ-Eudesmol
Caryophyllene oxide	cis-β-Farnesene	Germacrene D								o-Cymene
γ-Eudesmol	Humulene	δ-Selinene								1,4-Dimethoxybenzene
o-Cymene	γ-Gurjunene	δ-Guaiene								(6E)-6-Tridecene
1,4-Dimethoxybenzene	γ-Muurolene	δ-Cadinene								Tridecane
Undecane	Germacrene D	Caryophyllene oxide								1-Tetradecene
Dodecane	(+)-Bicyclogermacrene	γ-Eudesmol								Jasmone
(6E)-6-Tridecene	δ-Guaiene	α-epi-Cadinol								Tetradecane
Tridecane	γ-Cadinene	α-Eudesmol								1-Pentadecene
(E)-4-Tetradecene	δ-Cadinene	o-Cymene								Pentadecane
1-Tetradecene	α-Cadinene	1,4-Dimethoxybenzene								6,9-Heptadecadiene
Jasmone	Caryophyllene oxide	Butanoic acid, 2-methyl-, ethyl ester								1-Tetradecanol
Tetradecane	γ-Eudesmol	1-Hexanol								8-Heptadecene
1-Pentadecene	α-epi-Cadinol	Butyric acid, 2-hydroxy-3-methyl-, methyl ester								Heptadecane
Pentadecane	α-Eudesmol	Nonane
(Z)-7-Hexadecene	α-Cadinol	1-Cyclohexene-1-carboxylic acid, 2,6,6-trimethyl-, methyl ester
(Z)-3-Hexadecene	o-Cymene	(6E)-6-Tridecene
Cetene	1,4-Dimethoxybenzene	Tridecane
Hexadecane	1-Hexanol	1-Tetradecene
6,9-Heptadecadiene	1-Butanol, 3-methyl-, acetate	Jasmone
1-Tetradecanol	1-Cyclohexene-1-carboxylic acid, 2,6,6-trimethyl-, methyl ester	Tetradecane
8-Heptadecene	(6E)-6-Tridecene	1-Pentadecene
Heptadecane	Tridecane	Pentadecane
	(E)-4-Tetradecene	6,9-Heptadecadiene
	1-Tetradecene	1-Tetradecanol
	Jasmone	8-Heptadecene
	Tetradecane	Heptadecane
	1-Pentadecene
	Pentadecane
	(Z)-7-Hexadecene
	Cetene
	Hexadecane
	6,9-Heptadecadiene
	1-Tetradecanol
	8-Heptadecene
	Heptadecane

## Sheet: Fig. 3
Note: ZNH, KF, PLD, LS, ZQ, and YMY refer to different varieties of Antique Lotus. Additionally, P, S, and R denote petals, stamens, and receptacles, respectively.
		Type	Samples	MTs	STs	BPs	FADs
		P	ZNH-P	532.178	809.817	916.082	7395.53
		S	KF-P	1059.18	637.266	1347.13	5315.99
		R	PLD-P	2377.57	160.998	1156.36	4413.8
		P	LS-P	1345.78	333.308	901.771	4373.94
		S	ZQ-P	2347.46	113.986	875.853	8113.01
		R	YMY-P	1772.22	293.231	1253.4	6783.19
		P	ZNH-S	481.773	4012.1	2680.34	330.705
		S	KF-S	1008.32	3902.62	3734.6	414.677
		R	PLD-S	1312.82	18.775	3579.42	269.37
		P	LS-S	929.915	1765.21	2837.27	339.005
		S	ZQ-S	2092.51	26.4556	3156.79	514.49
		R	YMY-S	1479.31	2114.09	5263.65	431.054
		P	ZNH-R	230.986	516.597	1084.49	153.799
		S	KF-R	489.003	720.748	1512.18	172.491
		R	PLD-R	1011.33	58.1335	1724.34	132.903
		P	LS-R	549.222	328.186	1268.42	153.375
		S	ZQ-R	1142.04	48.9941	1512.1	270.384
		R	YMY-R	969.104	244.268	1708.83	198.924

## Sheet: Fig. 4
The data presented on this page are sourced from the original files of Table S2-S4.
Fig.4a	ZNH	KF	PLD	LS	ZQ	YMY
MTs	15	15	18	15	17	16
STs	18	15	5	12	4	18
BPs	2	2	2	2	2	2
FADs	17	17	17	20	21	20
Total	52	49	42	49	44	56
Fig.4b-d	ZNH-Petal	ZNH-Stamen	ZNH-Receptacle	KF-Petal	KF-Stamen	KF-Receptacle	PLD-Petal	PLD-Stamen	PLD-Receptacle	LS-Petal	LS-Stamen	LS-Receptacle	ZQ-Petal	ZQ-Stamen	ZQ-Receptacle	YMY-Petal	YMY-Stamen	YMY-Receptacle
MTs	12	15	10	12	14	13	15	16	12	12	15	12	14	17	14	13	16	13
STs	4	16	7	4	12	10	3	1	3	3	11	5	4	1	2	5	16	5
BPs	2	2	2	2	2	2	2	2	2	2	2	2	2	2	2	2	2	2
FADs	14	13	9	12	10	11	15	10	9	16	11	11	16	16	13	17	13	11
Total	32	46	28	30	38	36	35	29	26	33	39	30	36	36	31	37	47	31

## Sheet: Fig. 5
The data presented on this page are sourced from the original files of Table S2-S4.
Fig.5a
	ZNH			KF			PLD			LS			ZQ			YMY			FT
Petal	9653.61	1378.96	abc	8359.57	1145.18	bcd	8108.72	217.079	cd	6954.8	383.498	d	11450.3	884.246	a	10102	683.232	ab	5476.47	564.354	bc
Stamen	7504.91	676.541	b	9060.21	1129.59	a	5180.38	596.87	c	5871.4	495.631	c	5790.25	393.353	c	9288.1	696.039	a	4704.03	93.2494	a
Receptacle	1985.87	300.373	b	2894.42	209.568	a	2926.71	570.922	a	2299.21	205.924	ab	2973.52	353.974	a	3121.12	375.444	a	2197.56	198.256	a
Fig.5b
Type	Samples	C1	C2	C3	C4	C5	C6	C7	C8	C9	C10	C11	C12	C13	C14	C15	C16	C17	C18	C19	C20	C21	C22	C23	C24	C25	C26	C27	C28	C29	C30	C31	C32	C33	C34	C35	C36	C37	C38	C39	C40	C41	C42	C43	C44	C45	C46	C47	C48
Petal	ZNH-P	6.16441	26.729	0	82.9518	11.7323	36.365	0	0	33.6709	47.0791	109.777	0	64.6451	14.8683	0	67.7009	30.4949	0	0	0	684.909	0	85.9201	0	0	0	23.1622	0	0	0	0	15.8256	0	0	0	0	0	0	65.4003	850.682	0	0	0	0	0	0	0	0
Stamen	ZNH-S	2.63605	11.3718	0	43.6701	6.74886	22.6357	76.0952	0	29.6376	47.1529	100.832	0	73.4155	20.1255	12.6233	19.3385	1.68068	13.8095	20.5992	17.1055	3052.22	21.1279	401.011	0	0	16.391	92.2734	33.5593	0	23.7118	23.5408	51.2712	14.362	181.108	18.0624	21.4172	0	24.3333	77.3635	2602.98	0	9.52333	9.15561	0	0	0	0	0
Receptacle	ZNH-R	0	4.97679	0	2.93809	2.6195	0	26.4126	0	10.4524	13.8419	113.858	0	33.5214	8.40971	0	13.9547	0	0	0	0	380.677	0	51.0767	14.0086	0	0	15.4491	0	16.0998	0	0	14.7081	0	0	24.5768	0	0	0	73.6076	1010.88	0	12.34	0	0	0	0	0	0
Petal	KF-P	12.2328	52.7412	0	209.581	23.5208	71.4894	0	0	58.4789	92.1438	209.794	0	114.003	28.9877	0	131.712	54.4966	0	0	0	507.821	0	64.1478	0	0	0	45.8132	0	0	0	0	0	0	0	19.4848	0	0	0	67.9669	1279.16	0	0	0	0	0	10.9943	0	0
Stamen	KF-S	3.87868	22.9269	0	59.6848	15.2281	61.1092	117.578	0	80.5446	107.389	221.643	0	180.262	47.6272	16.4974	66.9796	6.96858	0	0	0	2992.77	21.9617	388.486	0	26.0196	0	90.0578	29.3388	0	25.255	23.2174	49.7388	0	197.66	29.1621	0	0	28.9557	88.0793	3646.52	0	9.8085	0	0	0	0	0	0
Receptacle	KF-R	0	5.02354	0	2.40389	3.52435	0	38.5446	0	25.6545	28.278	223.932	0	73.2221	18.9759	1.53127	57.91	5.86831	4.13449	0	0	478.358	14.0103	63.7673	0	0	0	17.6672	0	16.0837	16.1231	0	0	0	15.7247	53.1258	22.1843	23.7033	0	77.4928	1434.69	0	11.3684	0	0	10.6296	0	0	9.41362
Petal	PLD-P	30.9216	134.759	1.84028	420.195	59.57	172.092	0	2.45045	166.543	228.019	463.955	3.56927	302.596	74.3999	0	238.627	78.031	0	0	0	0	0	0	0	0	0	39.9143	0	0	0	0	0	0	105.5	15.5839	0	0	0	76.9673	1079.39	0	0	0	0	0	9.79769	0	0
Stamen	PLD-S	10.4565	45.8749	0	169.893	25.6566	57.3919	52.7991	1.47296	89.236	121.935	317.53	0	211.328	53.4957	10.6889	108.684	7.51204	28.8607	0	0	0	0	0	0	0	0	0	0	0	0	0	0	0	0	18.775	0	0	0	84.7503	3494.67	0	0	0	0	0	0	0	0
Receptacle	PLD-R	0	18.9234	0	0	10.4662	18.0275	28.5066	2.36835	89.5035	80.3806	382.225	0	220.341	57.1558	0	95.7055	7.73064	0	0	0	14.1396	0	0	0	0	0	0	0	15.3813	0	0	0	0	0	28.6126	0	0	0	97.0777	1627.26	0	9.08119	0	0	0	0	0	0
Petal	LS-P	19.5443	73.8241	0	239.004	32.2322	92.3096	0	0	93.7053	125.975	249.13	0	169.834	39.4787	0	155.748	54.9914	0	0	0	250.816	0	34.3346	0	0	0	0	0	0	0	0	0	0	0	48.1573	0	0	0	71.4048	830.366	0	0	0	0	0	11.3289	10.1146	0
Stamen	LS-S	4.61755	22.5815	0	67.1176	14.4519	32.1581	98.3619	0	72.2617	94.6367	203.986	0	168.954	41.7507	15.1547	72.9334	6.94748	14.0018	0	0	0	38.9331	157.501	0	15.5596	13.2528	38.7189	18.2849	0	0	14.8223	23.4032	0	37.2448	32.5447	0	0	0	83.5178	2753.75	0	9.80966	0	0	0	0	0	0
Receptacle	LS-R	0	7.16061	0	5.72568	4.22275	0	34.9962	0	27.5511	25.9358	233.339	0	78.5203	19.7412	0	93.8549	12.2749	5.89996	0	0	218.444	0	32.5431	14.1112	0	0	0	0	0	0	0	13.0881	0	0	50	0	0	0	80.1267	1188.3	9.22026	14.658	0	0	0	0	0	12.2241
Petal	ZQ-P	20.7895	95.1539	0	402.139	42.8703	125.301	0	1.3276	95.9019	162.938	392.81	3.01099	211.05	60.851	0	496.42	236.894	0	0	0	15.5532	0	0	0	0	16.5041	60.5009	0	0	0	0	0	0	0	21.4274	0	0	0	72.3006	803.552	0	0	0	0	0	10.786	10.035	0
Stamen	ZQ-S	12.8752	59.9046	0	202.558	39.0512	104.597	44.2454	2.69522	174.336	238.745	495.449	2.45196	407.276	106.822	8.36939	167.542	20.3231	5.27071	0	0	0	0	0	0	0	0	0	0	0	0	0	0	0	0	26.4556	0	0	0	115.689	3041.1	0	9.89948	0	0	0	0	0	0
Receptacle	ZQ-R	2.01291	12.6168	0	17.6496	9.50913	14.4637	26.5166	0	61.1238	72.4388	492.886	0	191.896	51.5961	0	168.78	17.9399	2.61073	0	0	12.7452	0	0	0	0	0	0	0	0	0	0	0	0	0	36.2488	0	0	0	93.4024	1418.7	0	15.408	0	9.07407	9.53951	0	0	11.1181
Petal	YMY-P	21.3773	78.3434	0	316.9	33.8183	96.9638	0	0	79.7283	133.722	313.796	1.88395	170.505	47.5616	0	354.847	122.771	0	0	0	184.673	0	27.9876	0	0	14.4093	35.2485	0	0	0	0	0	0	0	30.9122	0	0	0	68.5134	1184.88	0	0	0	0	0	11.4768	9.72062	0
Stamen	YMY-S	4.86996	33.7927	0	93.4525	24.278	64.4612	30.2467	0	111.535	150.545	374.39	1.77654	287.383	74.5305	5.90259	167.681	15.6345	38.8282	17.2784	0	1575.23	27.7431	187.823	0	16.6684	13.4994	46.3414	17.7759	0	17.0456	15.6308	26.5695	0	60.8717	47.2788	14.8194	15.3548	14.1608	90.3212	5173.32	0	9.7865	0	0	0	0	0	9.0132
Receptacle	YMY-R	0	7.64464	0	6.87157	6.43323	9.17917	23.5224	0	54.9986	59.4094	420.326	0	165.201	43.1956	0	156.302	9.82908	6.19115	0	0	165.099	0	27.2129	14.0076	0	0	0	0	14.7652	0	0	0	0	0	23.1834	0	0	0	89.0203	1619.81	0	16.9381	0	0	9.41412	0	0	0
[truncated: 16 more columns]

## Sheet: Fig. 6
The data presented on this page are sourced from the original files of Table S2-S4.
Fig. 6a
Compounds	Sample	ZNH-P	ZNH-S	ZNH-R	KF-P	KF-S	KF-R	PLD-P	PLD-S	PLD-R	LS-P	LS-S	LS-R	ZQ-P	ZQ-S	ZQ-R	YMY-P	YMY-S	YMY-R
3-Thujene	C1	6.16441	2.63605	0	12.2328	3.87868	0	30.9216	10.4565	0	19.5443	4.61755	0	20.7895	12.8752	2.01291	21.3773	4.86996	0
1R-α-Pinene	C2	26.729	11.3718	4.97679	52.7412	22.9269	5.02354	134.759	45.8749	18.9234	73.8241	22.5815	7.16061	95.1539	59.9046	12.6168	78.3434	33.7927	7.64464
Camphene	C3	0	0	0	0	0	0	1.84028	0	0	0	0	0	0	0	0	0	0	0
Sabinen	C4	82.9518	43.6701	2.93809	209.581	59.6848	2.40389	420.195	169.893	0	239.004	67.1176	5.72568	402.139	202.558	17.6496	316.9	93.4525	6.87157
β-Pinene	C5	11.7323	6.74886	2.6195	23.5209	15.2281	3.52435	59.57	25.6566	10.4662	32.2322	14.4519	4.22275	42.8703	39.0512	9.50913	33.8183	24.278	6.43323
β-Myrcene	C6	36.365	22.6357	0	71.4894	61.1092	0	172.092	57.3919	18.0275	92.3096	32.1581	0	125.301	104.597	14.4637	96.9638	64.4612	9.17917
(+)-2-Carene	C7	0	76.0952	26.4127	0	117.578	38.5446	0	52.7991	28.5066	0	98.3619	34.9962	0	44.2454	26.5166	0	30.2467	23.5224
α-Phellandrene	C8	0	0	0	0	0	0	2.45045	1.47296	2.36835	0	0	0	1.3276	2.69522	0	0	0	0
α-Terpinene	C9	33.6709	29.6376	10.4524	58.4789	80.5446	25.6545	166.543	89.236	89.5035	93.7053	72.2617	27.5511	95.902	174.336	61.1238	79.7283	111.535	54.9986
D-Limonene	C10	47.0791	47.1528	13.8419	92.1438	107.389	28.278	228.019	121.935	80.3806	125.975	94.6367	25.9358	162.938	238.745	72.4388	133.722	150.545	59.4094
Eucalyptol	C11	109.777	100.832	113.858	209.794	221.643	223.932	463.955	317.53	382.225	249.13	203.986	233.339	392.81	495.449	492.886	313.796	374.39	420.326
β-cis-Ocimene	C12	0	0	0	0	0	0	3.56927	0	0	0	0	0	3.01099	2.45196	0	1.88395	1.77654	0
γ-Terpinene	C13	64.6451	73.4155	33.5214	114.003	180.262	73.2221	302.596	211.328	220.341	169.834	168.954	78.5203	211.05	407.276	191.896	170.505	287.383	165.201
Terpinolene	C14	14.8683	20.1255	8.40971	28.9877	47.6272	18.9759	74.3998	53.4957	57.1558	39.4787	41.7507	19.7411	60.851	106.822	51.5961	47.5616	74.5305	43.1956
cis-2-p-Menthen-1-ol	C15	0	12.6233	0	0	16.4974	1.53127	0	10.6889	0	0	15.1547	0	0	8.36939	0	0	5.90259	0
Terpinen-4-ol	C16	67.7009	19.3385	13.9547	131.712	66.9796	57.91	238.627	108.684	95.7055	155.748	72.9334	93.8549	496.42	167.542	168.779	354.847	167.681	156.302
α-Terpineol	C17	30.4949	1.68068	0	54.4966	6.96858	5.86831	78.031	7.51204	7.73064	54.9914	6.94748	12.2749	236.894	20.3231	17.9399	122.771	15.6345	9.82908
α-Cyclogeraniol	C18	0	13.8095	0	0	0	4.13449	0	28.8607	0	0	14.0018	5.89996	0	5.27071	2.61073	0	38.8282	6.19115
Copaene	C19	0	20.5992	0	0	0	0	0	0	0	0	0	0	0	0	0	0	17.2784	0
(-)-β-Elemene	C20	0	17.1055	0	0	0	0	0	0	0	0	0	0	0	0	0	0	0	0
Caryophyllene	C21	684.909	3052.22	380.677	507.821	2992.77	478.358	0	0	14.1396	250.816	1374.94	218.444	15.5532	0	12.7452	184.673	1575.23	165.099
cis-β-Farnesene	C22	0	21.1279	0	0	21.9617	14.0103	0	0	0	0	38.9331	0	0	0	0	0	27.7431	0
Humulene	C23	85.9201	401.011	51.0767	64.1478	388.486	63.7673	0	0	0	34.3346	157.501	32.5431	0	0	0	27.9876	187.823	27.2129
(E)-β-Famesene	C24	0	0	14.0086	0	0	0	0	0	0	0	0	14.1112	0	0	0	0	0	14.0075
γ-Gurjunene	C25	0	0	0	0	26.0196	0	0	0	0	0	15.5596	0	0	0	0	0	16.6684	0
γ-Muurolene	C26	0	16.3911	0	0	0	0	0	0	0	0	13.2528	0	16.5041	0	0	14.4092	13.4994	0
Germacrene D	C27	23.1622	92.2734	15.4491	45.8132	90.0578	17.6673	39.9143	0	0	0	38.7189	0	60.5009	0	0	35.2485	46.3414	0
(+)-Bicyclogermacrene	C28	0	33.5593	0	0	29.3388	0	0	0	0	0	18.2849	0	0	0	0	0	17.7759	0
δ-Selinene	C29	0	0	16.0998	0	0	16.0837	0	0	15.3813	0	0	0	0	0	0	0	0	14.7652
δ-Guaiene	C30	0	23.7118	0	0	25.255	16.1231	0	0	0	0	0	0	0	0	0	0	17.0456	0
γ-Cadinene	C31	0	23.5408	0	0	23.2174	0	0	0	0	0	14.8223	0	0	0	0	0	15.6308	0
δ-Cadinene	C32	15.8256	51.2712	14.7081	0	49.7388	0	0	0	0	0	23.4032	13.0881	0	0	0	0	26.5695	0
α-Cadinene	C33	0	14.362	0	0	0	0	0	0	0	0	0	0	0	0	0	0	0	0
Caryophyllene oxide	C34	0	181.108	0	0	197.66	15.7247	105.5	0	0	0	37.2448	0	0	0	0	0	60.8717	0
γ-Eudesmol	C35	0	18.0624	24.5768	19.4848	29.1621	53.1258	15.5839	18.775	28.6126	48.1573	32.5447	50	21.4274	26.4556	36.2488	30.9122	47.2788	23.1834
α-epi-Cadinol	C36	0	21.4172	0	0	0	22.1843	0	0	0	0	0	0	0	0	0	0	14.8194	0
α-Eudesmol	C37	0	0	0	0	0	23.7033	0	0	0	0	0	0	0	0	0	0	15.3548	0
α-Cadinol	C38	0	24.3333	0	0	28.9557	0	0	0	0	0	0	0	0	0	0	0	14.1608	0
o-Cymene	C39	65.4003	77.3635	73.6076	67.9669	88.0793	77.4928	76.9672	84.7503	97.0777	71.4049	83.5178	80.1267	72.3006	115.689	93.4024	68.5134	90.3212	89.0203
1,4-Dimethoxybenzene	C40	850.682	2602.98	1010.88	1279.16	3646.52	1434.69	1079.39	3494.67	1627.26	830.366	2753.75	1188.3	803.552	3041.1	1418.7	1184.88	5173.32	1619.81
Butanoic acid, 2-methyl-, ethyl ester	C41	0	0	0	0	0	0	0	0	0	0	0	9.22026	0	0	0	0	0	0
1-Hexanol	C42	0	9.52333	12.34	0	9.8085	11.3684	0	0	9.08119	0	9.80966	14.658	0	9.89948	15.408	0	9.7865	16.9381
1-Butanol, 3-methyl-, acetate	C43	0	9.15561	0	0	0	0	0	0	0	0	0	0	0	0	0	0	0	0
Butyric acid, 2-hydroxy-3-methyl-, methyl ester	C44	0	0	0	0	0	0	0	0	0	0	0	0	0	0	9.07407	0	0	0
Nonane	C45	0	0	0	0	0	10.6296	0	0	0	0	0	0	0	0	9.53951	0	0	9.41412
Undecane	C46	0	0	0	10.9943	0	0	9.79769	0	0	11.3289	0	0	10.786	0	0	11.4768	0	0
Dodecane	C47	0	0	0	0	0	0	0	0	0	10.1146	0	0	10.035	0	0	9.72062	0	0
1-Cyclohexene-1-carboxylic acid, 2,6,6-trimethyl-, methyl ester	C48	0	0	0	0	0	9.41362	0	0	0	0	0	12.224	0	0	11.1182	0	9.0132	0
(6E)-6-Tridecene	C49	10.5054	0	0	0	11.5419	10.5824	9.53659	0	0	10.2296	0	0	10.9509	8.94337	0	10.4992	0	0
Tridecane	C50	35.9838	11.1344	10.4518	30.5795	0	0	33.0597	11.5378	10.8236	39.8582	11.3985	11.2136	41.5028	11.9379	11.9357	46.403	13.2284	12.1731
(E)-4-Tetradecene	C51	13.525	0	0	0	0	0	11.87	0	0	13.1307	0	0	19.5823	8.94089	0	14.8948	0	0
1-Tetradecene	C52	16.1651	9.66335	0	13.6702	0	0	11.9444	9.05914	0	14.0059	9.30694	0	16.9037	9.83391	9.47967	13.0858	9.78685	0
Jasmone	C53	0	18.6058	0	0	41.5579	0	0	16.0443	0	0	73.7734	0	0	27.1442	0	10.26	29.9321	9.55256
Tetradecane	C54	85.2838	12.7746	10.3968	70.7728	14.8422	10.6048	79.0092	13.8934	10.7412	63.891	14.0576	10.3697	116.788	15.7063	13.0429	97.3248	15.3034	11.0936
1-Pentadecene	C55	1015.46	36.1717	19.3489	642.847	46.2419	19.1275	620.892	39.1208	17.2745	790.895	44.012	17.8986	1369.59	76.3951	39.8028	1060.41	59.4281	22.2431
Pentadecane	C56	3673.18	105.586	43.8307	2663.39	147.818	40.6171	2256.83	100.486	35.6147	1940.79	87.6755	28.3087	3656.77	177.49	73.3693	3600.78	166.062	55.8359
(Z)-7-Hexadecene	C57	51.5287	0	0	0	0	0	0	0	0	27.3093	0	0	63.7727	9.82339	0	32.5332	0	0
(Z)-3-Hexadecene	C58	0	0	0	0	0	0	14.6058	0	0	0	0	0	0	0	0	0	0	0
Cetene	C59	20.8522	0	0	16.1305	0	0	14.9339	0	0	15.1499	0	0	25.049	9.12587	0	14.3167	0	0
Hexadecane	C60	44.2695	9.36434	0	33.1328	0	0	24.0409	0	0	29.2918	0	0	42.628	9.58225	0	27.837	9.2312	0
6,9-Heptadecadiene	C61	1197.28	27.9877	14.0452	865.141	38.2601	15.4339	592.822	18.5441	11.5605	689.809	22.3591	11.8544	1194.72	31.5117	17.8503	718.066	23.1094	14.3558
1-Tetradecanol	C62	741.493	35.6631	18.5553	647.327	54.4417	20.5204	466.941	27.8159	16.0722	410.795	28.7355	15.0447	997.348	52.7029	29.1247	701.825	40.6213	22.046
8-Heptadecene	C63	263.81	25.763	12.9885	157.154	27.8743	12.3908	158.89	18.8774	11.4447	165.741	21.2955	11.6267	346.693	35.4301	17.3872	260.378	26.4082	13.2828
Heptadecane	C64	226.185	19.3123	11.8419	164.856	22.2907	11.8023	108.628	13.9917	10.2902	141.606	16.5809	10.9567	189.899	20.0227	13.2518	153.371	19.144	11.9894
Fig.6b
Compounds	Sample	ZLH-P	KF-P	PLD-P	LS-P	ZQ-P	YMY-P
Pentadecane	C56	3673.18	2663.39	2256.83	1940.79	3656.77	3600.78
1,4-Dimethoxybenzene	C40	850.682	1279.16	1079.39	830.366	803.552	1184.88
1-Pentadecene	C55	1015.46	642.847	620.892	790.895	1369.59	1060.41
6,9-Heptadecadiene	C61	1197.28	865.141	592.822	689.809	1194.72	718.066
1-Tetradecanol	C62	741.493	647.327	466.941	410.795	997.348	701.825
Eucalyptol	C11	109.777	209.794	463.955	249.13	392.81	313.796
Sabinen	C4	82.9518	209.581	420.195	239.004	402.139	316.9
Caryophyllene	C21	684.909	507.821	0	250.816	15.5532	184.673
Terpinen-4-ol	C16	67.7009	131.712	238.627	155.748	496.42	354.847
8-Heptadecene	C63	263.81	157.154	158.89	165.741	346.693	260.378
γ-Terpinene	C13	64.6451	114.003	302.596	169.834	211.05	170.505
Heptadecane	C64	226.185	164.856	108.628	141.606	189.899	153.371
D-Limonene	C10	47.0791	92.1438	228.019	125.975	162.938	133.722
β-Myrcene	C6	36.365	71.4894	172.092	92.3096	125.301	96.9638
α-Terpineol	C17	30.4949	54.4966	78.031	54.9914	236.894	122.771
α-Terpinene	C9	33.6709	58.4789	166.543	93.7053	95.902	79.7283
Tetradecane	C54	85.2838	70.7728	79.0092	63.891	116.788	97.3248
1R-α-Pinene	C2	26.729	52.7412	134.759	73.8241	95.1539	78.3434
Fig.6c
Compounds	Sample	ZLH-P	KF-P	PLD-P	LS-P	ZQ-P	YMY-P
1,4-Dimethoxybenzene	C40	2602.98	3646.52	3494.67	2753.75	3041.1	5173.32
Caryophyllene	C21	3052.22	2992.77	0	1374.94	0	1575.23
Eucalyptol	C11	100.832	221.643	317.53	203.986	495.449	374.39
γ-Terpinene	C13	73.4155	180.262	211.328	168.954	407.276	287.383
Humulene	C23	401.011	388.486	0	157.501	0	187.823
Pentadecane	C56	105.586	147.818	100.486	87.6755	177.49	166.062
D-Limonene	C10	47.1528	107.389	121.935	94.6367	238.745	150.545
Sabinen	C4	43.6701	59.6848	169.893	67.1176	202.558	93.4525
Terpinen-4-ol	C16	19.3385	66.9796	108.684	72.9334	167.542	167.681
α-Terpinene	C9	29.6376	80.5446	89.236	72.2617	174.336	111.535
o-Cymene	C39	77.3635	88.0793	84.7503	83.5178	115.689	90.3212
Fig.6d
Compounds	Sample	ZLH-P	KF-P	PLD-P	LS-P	ZQ-P	YMY-P
1,4-Dimethoxybenzene	C40	1010.88	1434.69	1627.26	1188.3	1418.7	1619.81
Eucalyptol	C10	113.858	223.932	382.225	233.339	492.886	420.326
Caryophyllene	C21	380.677	478.358	14.1396	218.444	12.7452	165.099
γ-Terpinene	C11	33.5214	73.2221	220.341	78.5203	191.896	165.201
Terpinen-4-ol	C14	13.9547	57.91	95.7055	93.8549	168.779	156.302
Compound Type
	Group	No.	colour
Compound Type	MTs	C1	232133128
Compound Type	MTs	C2	232133128
Compound Type	MTs	C3	232133128
Compound Type	MTs	C4	232133128
Compound Type	MTs	C5	232133128
Compound Type	MTs	C6	232133128
Compound Type	MTs	C7	232133128
Compound Type	MTs	C8	232133128
Compound Type	MTs	C9	232133128
Compound Type	MTs	C10	232133128
Compound Type	MTs	C11	232133128
Compound Type	MTs	C12	232133128
Compound Type	MTs	C13	232133128
Compound Type	MTs	C14	232133128
Compound Type	MTs	C15	232133128
Compound Type	MTs	C16	232133128
Compound Type	MTs	C17	232133128
Compound Type	MTs	C18	232133128
Compound Type	STs	C19	254235184
Compound Type	STs	C20	254235184
Compound Type	STs	C21	254235184
Compound Type	STs	C22	254235184
Compound Type	STs	C23	254235184
Compound Type	STs	C24	254235184
Compound Type	STs	C25	254235184
Compound Type	STs	C26	254235184
Compound Type	STs	C27	254235184
Compound Type	STs	C28	254235184
Compound Type	STs	C29	254235184
Compound Type	STs	C30	254235184
Compound Type	STs	C31	254235184
Compound Type	STs	C32	254235184
Compound Type	STs	C33	254235184
Compound Type	STs	C34	254235184
Compound Type	STs	C35	254235184
Compound Type	STs	C36	254235184
Compound Type	STs	C37	254235184
Compound Type	STs	C38	254235184
Compound Type	BPs	C39	189217234
Compound Type	BPs	C40	189217234
Compound Type	FADs	C41	139170211
Compound Type	FADs	C42	139170211
Compound Type	FADs	C43	139170211
Compound Type	FADs	C44	139170211
Compound Type	FADs	C45	139170211
Compound Type	FADs	C46	139170211
Compound Type	FADs	C47	139170211
Compound Type	FADs	C48	139170211
Compound Type	FADs	C49	139170211
Compound Type	FADs	C50	139170211
Compound Type	FADs	C51	139170211
Compound Type	FADs	C52	139170211
Compound Type	FADs	C53	139170211
Compound Type	FADs	C54	139170211
Compound Type	FADs	C55	139170211
Compound Type	FADs	C56	139170211
Compound Type	FADs	C57	139170211
Compound Type	FADs	C58	139170211
Compound Type	FADs	C59	139170211
Compound Type	FADs	C60	139170211
Compound Type	FADs	C61	139170211
Compound Type	FADs	C62	139170211
Compound Type	FADs	C63	139170211
Compound Type	FADs	C64	139170211

## Sheet: Fig.S1
The Excel source file from Qualitative Analysis B.07.00 is in '.csv' format. As a result, the data presented on this page has been copied from the raw data extracted by GC-MS. If you require the CSV format of the extracted data, please feel free to contact me via email.
Fig.S1a														Fig.S1b														Fig.S1c
RT	ZNH-P	RT	KF-P	RT	PLD-P	RT	LS-P	RT	ZQ-P	RT	YMY-P			RT	ZNH-S	RT	KF-S	RT	PLD-S	RT	LS-S	RT	ZQ-S	RT	YMY-S			RT	ZNH-R	RT	KF-R	RT	PLD-R	RT	LS-R	RT	ZQ-R	RT	YMY-R
5.00548	2816	5.00542	3826	5.0055	3768	5.00537	3527	5.0054	3513	5.0055	3688			5.00548	4276	5.00553	4214	5.00548	3969	5.00555	4404	5.0054	3831	5.00555	3783			5.00532	3911	5.00535	4367	5.00528	3849	5.00528	4572	5.00528	5262	5.00557	4381
5.01195	2953	5.01188	3241	5.01197	3649	5.01183	3266	5.01187	3028	5.01197	7813			5.01195	3921	5.012	3688	5.01195	3811	5.01202	3867	5.01187	3703	5.01202	4196			5.0118	3566	5.01182	4275	5.01175	3413	5.01175	3761	5.01175	4293	5.01203	3555
5.01842	3030	5.01835	3739	5.01843	3681	5.0183	3834	5.01833	2958	5.01845	7226			5.01842	3926	5.01848	3576	5.01842	4068	5.01848	3638	5.01833	3585	5.01848	4080			5.01827	3285	5.01828	4168	5.01822	4069	5.01822	4228	5.01822	4148	5.0185	3639
5.02488	3225	5.02482	3375	5.0249	3405	5.02477	3933	5.0248	3219	5.02492	6808			5.02488	3673	5.02495	3730	5.02488	3339	5.02495	3720	5.0248	3840	5.02497	3644			5.02473	3494	5.02475	4137	5.02468	4001	5.02468	3766	5.02468	3525	5.02497	4151
5.03137	3329	5.03128	3481	5.03137	3873	5.03123	3706	5.03127	3202	5.03138	5246			5.03135	3965	5.03142	4092	5.03135	3511	5.03143	3961	5.03127	3608	5.03143	3529			5.0312	3647	5.03123	4367	5.03117	3755	5.03115	4514	5.03115	4234	5.03143	3518
5.03783	3010	5.03775	4102	5.03783	3424	5.0377	2949	5.03775	3330	5.03785	5342			5.03782	3706	5.03788	4018	5.03782	3341	5.0379	3755	5.03775	3286	5.0379	3072			5.03767	3702	5.0377	3861	5.03763	3965	5.03763	3605	5.03763	4397	5.0379	4444
5.0443	3184	5.04422	3268	5.0443	3162	5.04417	3183	5.04422	3000	5.04432	7708			5.04428	3881	5.04435	4523	5.0443	3400	5.04437	3855	5.04422	3827	5.04437	3726			5.04413	3371	5.04417	4293	5.0441	3406	5.0441	4062	5.0441	4685	5.04437	5129
5.05077	3654	5.05068	3430	5.05077	3754	5.05065	3741	5.05068	3089	5.05078	7476			5.05077	3917	5.05082	3562	5.05077	3498	5.05083	3597	5.05068	3773	5.05083	3898			5.0506	3745	5.05063	4625	5.05057	3376	5.05057	3917	5.05057	7414	5.05083	16206
5.05723	3556	5.05717	3848	5.05723	3780	5.05712	3811	5.05715	3557	5.05725	5134			5.05723	3628	5.05728	3532	5.05723	3702	5.0573	4030	5.05715	3654	5.0573	4397			5.05707	3626	5.0571	3968	5.05703	3472	5.05703	5615	5.05703	22071	5.05732	61496
5.0637	3624	5.06363	3841	5.06372	3336	5.06358	3827	5.06362	3269	5.06372	8517			5.0637	3698	5.06375	4024	5.0637	3439	5.06377	3759	5.06362	4920	5.06377	4072			5.06353	4064	5.06357	5749	5.0635	3675	5.0635	9995	5.0635	61246	5.06378	126222
5.07017	3333	5.0701	3208	5.07018	3593	5.07005	3488	5.07008	3468	5.0702	6693			5.07017	4430	5.07022	7973	5.07017	3619	5.07023	3421	5.07008	8418	5.07023	7435			5.07002	6516	5.07003	9059	5.06997	3491	5.06997	24854	5.06997	107320	5.07025	183505
5.07663	3151	5.07657	3126	5.07665	3574	5.07652	3501	5.07655	3623	5.07667	7267			5.07663	7715	5.0767	14619	5.07663	3426	5.0767	5236	5.07655	16227	5.0767	12932			5.07648	13123	5.0765	16328	5.07643	3459	5.07643	44661	5.07643	137302	5.07672	196768
5.08312	3540	5.08303	3136	5.08312	3125	5.08298	3280	5.08302	3603	5.08313	10623			5.0831	11583	5.08317	19974	5.0831	3573	5.08318	9193	5.08302	25266	5.08318	18963			5.08295	23432	5.08297	24114	5.08292	3923	5.0829	55647	5.0829	137739	5.08318	173776
5.08958	2978	5.0895	3412	5.08958	3655	5.08945	3829	5.0895	3651	5.0896	10551			5.08957	15879	5.08963	23552	5.08957	3888	5.08965	13855	5.0895	31245	5.08965	24233			5.08942	29996	5.08945	29177	5.08938	3762	5.08938	56454	5.08938	114725	5.08965	143641
5.09605	3056	5.09597	3691	5.09605	3793	5.09592	3571	5.09597	3386	5.09607	15528			5.09603	18738	5.0961	25433	5.09605	5042	5.09612	17846	5.09597	29624	5.09612	25662			5.09588	31785	5.09592	25819	5.09585	5544	5.09585	49497	5.09585	90115	5.09612	105761
5.10252	3225	5.10243	3675	5.10252	4303	5.10238	3574	5.10243	3208	5.10253	13531			5.10252	17821	5.10257	22071	5.10252	5935	5.10258	18823	5.10243	26396	5.10258	22917			5.10235	30316	5.10238	24537	5.10232	6059	5.10232	40368	5.10232	70296	5.10258	81545
5.10898	3534	5.10892	3867	5.10898	4685	5.10887	3490	5.1089	3392	5.109	15410			5.10898	17016	5.10903	17862	5.10898	7382	5.10905	17040	5.1089	23066	5.10905	19117			5.10882	27034	5.10885	21796	5.10878	7050	5.10878	33830	5.10878	55312	5.10905	60354
5.11545	3736	5.11538	4526	5.11547	5780	5.11533	3805	5.11537	3718	5.11547	12552			5.11545	14550	5.1155	16198	5.11545	8635	5.11552	14215	5.11537	19319	5.11552	15387			5.11528	24650	5.11532	19022	5.11525	8633	5.11525	26150	5.11525	43927	5.11553	47196
5.12192	3907	5.12185	4512	5.12193	7515	5.1218	4257	5.12183	4486	5.12195	14108			5.12192	13338	5.12197	13888	5.12192	8298	5.12198	13904	5.12183	17702	5.12198	14853			5.12177	22401	5.12178	18210	5.12172	9308	5.12172	22507	5.12172	36409	5.122	41529
5.12838	5150	5.12832	4785	5.1284	8869	5.12827	4663	5.1283	4886	5.12842	15046			5.12838	12616	5.12845	11487	5.12838	8179	5.12845	12227	5.1283	16564	5.12845	13622			5.12823	19746	5.12825	15224	5.12818	10566	5.12818	19816	5.12818	32556	5.12847	34461
5.13485	4625	5.13478	5547	5.13487	9795	5.13473	5013	5.13477	5409	5.13488	13607			5.13485	11817	5.13492	11543	5.13485	7890	5.13493	12467	5.13477	14320	5.13493	10899			5.1347	18755	5.13472	13574	5.13465	11788	5.13465	17441	5.13465	30077	5.13493	29669
5.14133	4921	5.14125	5606	5.14133	9311	5.1412	4617	5.14125	5397	5.14135	14433			5.14132	11225	5.14138	10575	5.14132	7369	5.1414	9870	5.14125	12454	5.1414	10347			5.14117	17432	5.1412	12878	5.14113	10947	5.14112	15514	5.14112	26297	5.1414	25979
5.1478	5444	5.14772	4727	5.1478	9059	5.14767	4806	5.14772	4939	5.14782	11075			5.14778	10185	5.14785	9121	5.14778	6687	5.14787	9221	5.14772	11442	5.14787	9008			5.14763	16817	5.14767	11400	5.1476	10126	5.1476	13667	5.1476	21316	5.14787	22822
5.15427	4234	5.15418	5556	5.15427	7558	5.15413	5156	5.15418	5158	5.15428	11495			5.15427	9295	5.15432	8956	5.15427	6764	5.15433	8807	5.15418	11262	5.15433	8770			5.1541	13901	5.15413	10113	5.15407	9361	5.15407	11809	5.15407	21062	5.15433	20485
5.16073	5077	5.16065	4120	5.16073	6854	5.16062	4324	5.16065	4776	5.16075	9292			5.16073	8091	5.16078	7547	5.16073	6459	5.1608	8742	5.16065	9080	5.1608	7556			5.16057	11744	5.1606	9916	5.16053	8653	5.16053	10466	5.16053	16800	5.1608	17899
5.1672	4247	5.16713	4353	5.1672	4790	5.16708	3788	5.16712	3739	5.16722	11151			5.1672	7606	5.16725	7344	5.1672	5723	5.16727	8146	5.16712	8742	5.16727	7682			5.16703	11856	5.16707	8832	5.167	6935	5.167	9577	5.167	16838	5.16728	16763
5.17367	4238	5.1736	4026	5.17368	5143	5.17355	3851	5.17358	3678	5.17368	7224			5.17367	7410	5.17372	7245	5.17367	5645	5.17373	7544	5.17358	7850	5.17373	7129			5.1735	10847	5.17353	8128	5.17347	7023	5.17347	9692	5.17347	13206	5.17375	14657
5.18013	3488	5.18007	3488	5.18015	4641	5.18002	3849	5.18005	3512	5.18017	9998			5.18013	6721	5.18018	6402	5.18013	4671	5.1802	6579	5.18005	6990	5.1802	6828			5.17998	10054	5.18	7463	5.17993	5478	5.17993	8260	5.17993	13734	5.18022	13379
5.1866	3246	5.18653	4055	5.18662	4314	5.18648	3523	5.18652	3275	5.18663	9156			5.1866	6209	5.18667	6853	5.1866	4935	5.18667	6708	5.18652	6898	5.18668	6347			5.18645	8622	5.18647	8352	5.1864	4514	5.1864	8334	5.1864	12249	5.18668	13130
5.19308	3626	5.193	3116	5.19308	4189	5.19295	3946	5.19298	3762	5.1931	9441			5.19307	5572	5.19313	6374	5.19307	4600	5.19315	6271	5.19298	6323	5.19315	5903			5.19292	7618	5.19293	6282	5.19288	5449	5.19287	7570	5.19287	10955	5.19315	12742
5.19955	2833	5.19947	3492	5.19955	3659	5.19942	3331	5.19947	3060	5.19957	9394			5.19953	5977	5.1996	6291	5.19953	4128	5.19962	6398	5.19947	6106	5.19962	5927			5.19938	7761	5.19942	6966	5.19935	4818	5.19935	8214	5.19935	10854	5.19962	11481
5.20602	3118	5.20593	3696	5.20602	3853	5.20588	4016	5.20593	3402	5.20603	8734			5.206	5993	5.20607	5831	5.20602	4524	5.20608	5792	5.20593	6347	5.20608	5658			5.20585	7946	5.20588	7347	5.20582	5103	5.20582	7415	5.20582	11315	5.20608	11357
5.21248	3704	5.2124	4147	5.21248	3722	5.21237	3296	5.2124	2966	5.2125	8460			5.21248	5655	5.21253	6245	5.21248	3961	5.21255	5386	5.2124	6412	5.21255	6407			5.21232	6848	5.21235	5682	5.21228	4348	5.21228	7066	5.21228	9304	5.21255	9889
5.21895	3483	5.21888	3665	5.21895	4141	5.21883	3124	5.21887	3170	5.21897	7944			5.21895	5218	5.219	5577	5.21895	4594	5.21902	4938	5.21887	5859	5.21902	4636			5.21878	7096	5.21882	6373	5.21875	4664	5.21875	6832	5.21875	9078	5.21902	9915
5.22542	3635	5.22535	3644	5.22543	3646	5.2253	3590	5.22533	3822	5.22543	8612			5.22542	5400	5.22547	5971	5.22542	3926	5.22548	4935	5.22533	4859	5.22548	4820			5.22525	7175	5.22528	5740	5.22522	3995	5.22522	6895	5.22522	8872	5.2255	9937
5.23188	3722	5.23182	3793	5.2319	3719	5.23177	3400	5.2318	3422	5.23192	6178			5.23188	5500	5.23193	5073	5.23188	3769	5.23195	5706	5.2318	6026	5.23195	5986			5.23173	6439	5.23175	6074	5.23168	4616	5.23168	7000	5.23168	9016	5.23197	9360
5.23835	2864	5.23828	3759	5.23837	4108	5.23823	3598	5.23827	2989	5.23838	8685			5.23835	4490	5.23842	5951	5.23835	3761	5.23842	5471	5.23827	5773	5.23842	4935			5.2382	6698	5.23822	5675	5.23815	3951	5.23815	6027	5.23815	8026	5.23843	8444
5.24482	3178	5.24475	3668	5.24483	3965	5.2447	3154	5.24473	3572	5.24485	6919			5.24482	4931	5.24488	6246	5.24482	3589	5.2449	5627	5.24473	5887	5.2449	5105			5.24467	6139	5.24468	6119	5.24463	4501	5.24462	6715	5.24462	8334	5.2449	8322
5.2513	3523	5.25122	3964	5.2513	4090	5.25117	3555	5.25122	3133	5.25132	8056			5.25128	4777	5.25135	5035	5.25128	4436	5.25137	4838	5.25122	5368	5.25137	4055			5.25113	6115	5.25117	6362	5.2511	4406	5.25108	5600	5.25108	8376	5.25137	8248
5.25777	3645	5.25768	4220	5.25777	3646	5.25763	3686	5.25768	3212	5.25778	7535			5.25775	4907	5.25782	5447	5.25775	3601	5.25783	4983	5.25768	4916	5.25783	5097			5.2576	5823	5.25763	5500	5.25757	4077	5.25757	5566	5.25757	7060	5.25783	9174
5.26423	3742	5.26415	3324	5.26423	3613	5.2641	3446	5.26415	3848	5.26425	7669			5.26423	5174	5.26428	4268	5.26423	4183	5.2643	5404	5.26415	5198	5.2643	5174			5.26407	6436	5.2641	5042	5.26403	4460	5.26403	5846	5.26403	7662	5.2643	8180
5.2707	3421	5.27062	3585	5.2707	3457	5.27058	3497	5.27062	3268	5.27072	9422			5.2707	4077	5.27075	4900	5.2707	3748	5.27077	5300	5.27062	4871	5.27077	4318			5.27053	5982	5.27057	5373	5.2705	4116	5.2705	6546	5.2705	7128	5.27077	7349
5.27717	3243	5.2771	3257	5.27717	4130	5.27705	3359	5.27708	3502	5.27718	7892			5.27717	4239	5.27722	4801	5.27717	3804	5.27723	5254	5.27708	4671	5.27723	4730			5.277	5929	5.27703	5847	5.27697	3786	5.27697	6380	5.27697	7173	5.27725	8204
5.28363	3175	5.28357	3611	5.28365	3835	5.28352	3499	5.28355	3103	5.28365	8523			5.28363	5076	5.28368	5398	5.28363	4345	5.2837	4874	5.28355	5248	5.2837	4634			5.28347	5049	5.2835	5096	5.28343	4051	5.28343	5629	5.28343	6482	5.28372	7325
5.2901	3004	5.29003	3466	5.29012	3612	5.28998	3159	5.29002	3561	5.29013	6624			5.2901	4834	5.29015	4938	5.2901	3732	5.29017	5386	5.29002	5065	5.29017	5099			5.28995	5471	5.28997	5151	5.2899	4160	5.2899	5299	5.2899	7234	5.29018	7111
5.29657	3479	5.2965	3609	5.29658	3426	5.29645	3787	5.29648	3040	5.2966	7795			5.29657	6508	5.29663	5679	5.29657	3171	5.29663	5244	5.29648	5457	5.29665	6268			5.29642	5343	5.29643	5097	5.29637	3865	5.29637	5647	5.29637	6813	5.29665	6952
5.30305	2959	5.30297	3212	5.30305	4141	5.30292	3782	5.30295	3171	5.30307	6154			5.30303	8961	5.3031	4737	5.30303	3323	5.30312	6079	5.30295	7738	5.30312	7018			5.30288	5845	5.3029	5111	5.30285	4020	5.30283	5286	5.30283	7047	5.30312	7998
5.30952	2852	5.30943	3658	5.30952	3102	5.30938	3539	5.30943	3515	5.30953	8148			5.3095	12557	5.30957	5808	5.3095	3879	5.30958	7174	5.30943	8909	5.30958	9803			5.30935	6030	5.30938	5709	5.30932	4342	5.30932	6269	5.30932	8230	5.30958	7842
5.31598	3259	5.3159	3514	5.31598	3345	5.31585	4113	5.3159	2919	5.316	5998			5.31597	15493	5.31603	5846	5.31598	3771	5.31605	8780	5.3159	9777	5.31605	11560			5.31582	6061	5.31585	6024	5.31578	4080	5.31578	6209	5.31578	7675	5.31605	7949
5.32245	3281	5.32237	3786	5.32245	3464	5.32233	2854	5.32237	3316	5.32247	8091			5.32245	17411	5.3225	6813	5.32245	4369	5.32252	9192	5.32237	10684	5.32252	13413			5.32228	6447	5.32232	6902	5.32225	3899	5.32225	6439	5.32225	8170	5.32252	9112
5.32892	3325	5.32885	3975	5.32892	3683	5.3288	3731	5.32883	3327	5.32893	7756			5.32892	15642	5.32897	6816	5.32892	4536	5.32898	9772	5.32883	10214	5.32898	11645			5.32875	6434	5.32878	6339	5.32872	4462	5.32872	6411	5.32872	7428	5.329	9537
5.33538	3449	5.33532	3658	5.3354	3841	5.33527	3826	5.3353	3055	5.3354	7586			5.33538	12679	5.33543	5164	5.33538	4324	5.33545	8480	5.3353	8435	5.33545	10769			5.33522	7192	5.33525	5646	5.33518	4404	5.33518	6007	5.33518	6849	5.33547	8786
5.34185	3274	5.34178	3215	5.34187	3484	5.34173	3330	5.34177	3055	5.34188	9139			5.34185	10482	5.3419	5744	5.34185	4839	5.34192	7541	5.34177	7210	5.34192	9007			5.3417	5856	5.34172	5583	5.34165	4614	5.34165	5653	5.34165	6822	5.34193	7565
5.34832	3137	5.34825	3529	5.34833	3749	5.3482	3880	5.34823	2963	5.34835	6481			5.34832	7927	5.34838	5390	5.34832	4335	5.34838	6428	5.34823	6434	5.34838	6798			5.34817	5634	5.34818	4795	5.34812	3886	5.34812	5293	5.34812	6966	5.3484	7318
5.35478	3406	5.35472	3717	5.3548	3869	5.35467	3381	5.3547	3422	5.35482	7110			5.35478	5746	5.35485	4858	5.35478	3951	5.35487	4869	5.3547	6387	5.35487	6125			5.35463	5704	5.35465	4980	5.3546	3773	5.35458	5069	5.35458	6272	5.35487	6956
5.36127	3310	5.36118	3960	5.36127	3618	5.36113	3417	5.36118	3281	5.36128	4516			5.36125	5793	5.36132	4591	5.36125	3450	5.36133	5269	5.36118	5465	5.36133	5534			5.3611	5110	5.36113	4809	5.36107	4231	5.36105	5338	5.36105	6280	5.36133	6899
5.36773	3190	5.36765	2766	5.36773	3563	5.3676	3541	5.36765	3662	5.36775	7644			5.36772	7349	5.36778	4861	5.36772	4104	5.3678	4769	5.36765	5366	5.3678	5165			5.36757	4689	5.3676	5744	5.36753	5066	5.36753	5450	5.36753	6472	5.3678	7183
5.3742	3095	5.37412	3158	5.3742	3147	5.37407	3568	5.37412	3427	5.37422	5644			5.3742	8611	5.37425	4613	5.3742	4688	5.37427	6045	5.37412	5827	5.37427	5677			5.37403	4457	5.37407	5123	5.374	4639	5.374	5063	5.374	5981	5.37427	6625
5.38067	2870	5.3806	3646	5.38067	3921	5.38055	3989	5.38058	3215	5.38068	7588			5.38067	11118	5.38072	6235	5.38067	3998	5.38073	4755	5.38058	6372	5.38073	6621			5.3805	4837	5.38053	5027	5.38047	3516	5.38047	4989	5.38047	5987	5.38073	6677
5.38713	3474	5.38707	3662	5.38713	3675	5.38702	3623	5.38705	3575	5.38715	6673			5.38713	13164	5.38718	5453	5.38713	4102	5.3872	5649	5.38705	7022	5.3872	7246			5.38697	5149	5.387	4951	5.38693	3754	5.38693	4628	5.38693	6083	5.38722	7332
5.3936	3193	5.39353	3190	5.39362	3305	5.39348	3703	5.39352	2664	5.39362	7219			5.3936	12606	5.39365	4593	5.3936	4345	5.39367	5852	5.39352	6637	5.39367	7429			5.39345	5231	5.39347	4959	5.3934	3494	5.3934	5217	5.3934	6796	5.39368	6844
5.40007	3160	5.4	3593	5.40008	3680	5.39995	3392	5.39998	3328	5.4001	7782			5.40007	11180	5.40012	4851	5.40007	4193	5.40013	6608	5.39998	6809	5.40013	7184			5.39992	5344	5.39993	5411	5.39987	4163	5.39987	5392	5.39987	6504	5.40015	6516
5.40653	3833	5.40647	3299	5.40655	3661	5.40642	3525	5.40645	3323	5.40657	6201			5.40653	9400	5.4066	4892	5.40653	3947	5.4066	5982	5.40645	5772	5.40662	6322			5.40638	4570	5.4064	4974	5.40633	4093	5.40633	4586	5.40633	5741	5.40662	7115
5.41302	3614	5.41293	3774	5.41302	3205	5.41288	3226	5.41292	2892	5.41303	7376			5.413	8733	5.41307	4850	5.413	3864	5.41308	4519	5.41292	5415	5.41308	4603			5.41285	4814	5.41287	4581	5.41282	3944	5.4128	4728	5.4128	6620	5.41308	6655
5.41948	3329	5.4194	4051	5.41948	3601	5.41935	3254	5.4194	3196	5.4195	6817			5.41947	6815	5.41953	4577	5.41947	3738	5.41955	4742	5.4194	4688	5.41955	5355			5.41932	4662	5.41935	4401	5.41928	3949	5.41928	4943	5.41928	6406	5.41955	5475
5.42595	3122	5.42587	3645	5.42595	3336	5.42582	4067	5.42587	3258	5.42597	7723			5.42593	5849	5.426	4923	5.42595	3690	5.42602	4401	5.42587	4956	5.42602	5285			5.42578	4030	5.42582	4790	5.42575	3556	5.42575	4859	5.42575	5569	5.42602	6531
5.43242	3239	5.43233	3647	5.43242	3426	5.4323	3631	5.43233	3227	5.43243	5075			5.43242	5477	5.43247	4740	5.43242	4379	5.43248	4003	5.43233	3450	5.43248	4028			5.43225	4295	5.43228	4071	5.43222	4076	5.43222	5644	5.43222	5720	5.43248	5455
5.43888	3704	5.43882	4133	5.43888	4170	5.43877	4040	5.4388	3413	5.4389	7811			5.43888	4456	5.43893	4212	5.43888	3966	5.43895	4142	5.4388	4656	5.43895	4543			5.43872	4328	5.43875	4724	5.43868	3576	5.43868	5122	5.43868	5692	5.43897	5891
5.44535	3726	5.44528	3707	5.44537	3817	5.44523	3113	5.44527	3210	5.44537	5282			5.44535	4296	5.4454	4656	5.44535	3683	5.44542	4386	5.44527	3542	5.44542	3925			5.44518	4334	5.44522	3935	5.44515	3874	5.44515	4447	5.44515	5812	5.44543	5654
5.45182	2889	5.45175	3742	5.45183	3951	5.4517	3508	5.45173	2778	5.45185	8420			5.45182	3911	5.45187	4443	5.45182	3622	5.45188	4581	5.45173	4027	5.45188	4004			5.45167	4054	5.45168	5034	5.45162	3264	5.45162	3996	5.45162	6364	5.4519	5641
5.45828	3466	5.45822	3983	5.4583	3652	5.45817	3331	5.4582	3365	5.45832	6480			5.45828	4346	5.45835	4530	5.45828	3590	5.45835	4646	5.4582	4577	5.45835	4136			5.45813	4674	5.45815	4125	5.45808	3852	5.45808	4982	5.45808	5609	5.45837	5714
5.46477	3992	5.46468	3399	5.46477	3991	5.46463	3305	5.46467	2867	5.46478	7030			5.46475	4605	5.46482	3893	5.46475	4157	5.46483	4447	5.46467	4351	5.46483	4160			5.4646	4260	5.46462	4821	5.46457	3666	5.46455	4799	5.46455	5624	5.46483	6000
5.47123	3376	5.47115	3460	5.47123	3731	5.4711	3346	5.47115	2880	5.47125	7435			5.47122	3585	5.47128	4792	5.47122	4021	5.4713	4459	5.47115	3806	5.4713	4286			5.47107	4271	5.4711	4182	5.47103	3828	5.47102	4805	5.47102	5254	5.4713	6552
5.4777	3454	5.47762	3818	5.4777	3842	5.47757	3322	5.47762	3615	5.47772	6412			5.47768	4274	5.47775	3649	5.47768	3641	5.47777	4025	5.47762	4680	5.47777	3962			5.47753	4179	5.47757	4278	5.4775	4004	5.4775	4369	5.4775	5678	5.47777	5525
5.48417	3429	5.48408	3582	5.48417	3498	5.48403	3570	5.48408	3309	5.48418	7699			5.48417	3792	5.48422	3978	5.48417	3452	5.48423	4658	5.48408	4549	5.48423	3489			5.484	4315	5.48403	4626	5.48397	3950	5.48397	4932	5.48397	5239	5.48423	5098
5.49063	3194	5.49057	4118	5.49063	3810	5.49052	3565	5.49055	3404	5.49065	3165			5.49063	4165	5.49068	3793	5.49063	3658	5.4907	3555	5.49055	3732	5.4907	4034			5.49047	4064	5.4905	4462	5.49043	3549	5.49043	5026	5.49043	5545	5.4907	5143
5.4971	3291	5.49703	3912	5.4971	3765	5.49698	3258	5.49702	3289	5.49712	7516			5.4971	3704	5.49715	3938	5.4971	3685	5.49717	3977	5.49702	3972	5.49717	3808			5.49693	3848	5.49697	4856	5.4969	3415	5.4969	4432	5.4969	4404	5.49718	5152
5.50357	3278	5.5035	3806	5.50358	3627	5.50345	3214	5.50348	3291	5.50358	7551			5.50357	3486	5.50362	4611	5.50357	3367	5.50363	3899	5.50348	4106	5.50363	3796			5.50342	5078	5.50343	4377	5.50337	3769	5.50337	4705	5.50337	5067	5.50365	5093
5.51003	3638	5.50997	3636	5.51005	3795	5.50992	3539	5.50995	3442	5.51007	6468			5.51003	3964	5.51008	4107	5.51003	3728	5.5101	4095	5.50995	3870	5.5101	3590			5.50988	3954	5.5099	3549	5.50983	3804	5.50983	4627	5.50983	5040	5.51012	5797
5.5165	3068	5.51643	3573	5.51652	3569	5.51638	3244	5.51642	2909	5.51653	7302			5.5165	3703	5.51657	4446	5.5165	3886	5.51657	4004	5.51642	4306	5.51658	3897			5.51635	4573	5.51637	3747	5.5163	3387	5.5163	4416	5.5163	4811	5.51658	5284
5.52298	2798	5.5229	4040	5.52298	3645	5.52285	3437	5.52288	3137	5.523	5420			5.52297	4036	5.52303	3790	5.52297	3744	5.52305	4479	5.52288	4248	5.52305	3721			5.52282	4136	5.52283	3808	5.52278	3842	5.52277	4324	5.52277	5634	5.52305	5448
5.52945	3666	5.52937	3733	5.52945	3303	5.52932	3623	5.52937	3482	5.52947	7376			5.52943	4330	5.5295	4184	5.52943	3581	5.52952	4344	5.52937	4166	5.52952	3879			5.52928	4258	5.52932	4044	5.52925	4284	5.52925	4442	5.52925	5016	5.52952	5112
5.53592	3085	5.53583	3792	5.53592	3581	5.53578	3271	5.53583	3423	5.53593	6021			5.5359	3559	5.53597	4502	5.53592	3721	5.53598	4096	5.53583	4315	5.53598	3578			5.53575	4109	5.53578	4054	5.53572	4179	5.53572	4515	5.53572	5364	5.53598	4838
5.54238	3077	5.5423	3223	5.54238	3546	5.54227	3226	5.5423	2953	5.5424	7380			5.54238	3718	5.54243	4517	5.54238	3616	5.54245	3211	5.5423	4141	5.54245	3729			5.54222	3460	5.54225	4488	5.54218	3093	5.54218	4087	5.54218	5000	5.54245	4695
5.54885	3503	5.54878	3870	5.54885	3896	5.54873	3411	5.54877	3097	5.54887	7011			5.54885	3654	5.5489	4091	5.54885	4290	5.54892	3979	5.54877	4583	5.54892	4216			5.54868	4149	5.54872	4049	5.54865	3427	5.54865	4112	5.54865	4951	5.54893	5012
5.55532	3335	5.55525	4110	5.55533	3985	5.5552	3126	5.55523	3129	5.55533	6914			5.55532	4088	5.55537	3666	5.55532	3690	5.55538	3980	5.55523	4159	5.55538	3589			5.55515	3767	5.55518	4292	5.55512	3390	5.55512	4242	5.55512	4403	5.5554	5627
5.56178	3458	5.56172	3496	5.5618	3581	5.56167	3319	5.5617	3334	5.56182	3250			5.56178	4083	5.56183	4130	5.56178	3335	5.56185	3934	5.5617	4135	5.56185	4163			5.56163	3805	5.56165	4711	5.56158	3010	5.56158	3950	5.56158	4889	5.56187	5072
5.56825	3540	5.56818	3163	5.56827	3880	5.56813	3289	5.56817	2819	5.56828	3504			5.56825	3620	5.56832	4192	5.56825	3548	5.56832	3601	5.56817	3403	5.56832	3628			5.5681	4659	5.56812	3821	5.56805	3695	5.56805	4114	5.56805	5032	5.56833	4875
5.57473	3187	5.57465	3886	5.57473	3476	5.5746	3857	5.57463	3137	5.57475	3462			5.57472	4786	5.57478	3745	5.57472	3511	5.5748	3526	5.57463	4068	5.5748	3876			5.57457	3442	5.57458	4463	5.57453	4255	5.57452	5135	5.57452	4831	5.5748	5062
5.5812	3443	5.58112	3864	5.5812	3500	5.58107	3314	5.58112	3246	5.58122	3556			5.58118	3725	5.58125	4299	5.58118	4013	5.58127	4047	5.58112	3696	5.58127	3838			5.58103	4330	5.58107	4843	5.581	4280	5.58098	4668	5.58098	4861	5.58127	5127
5.58767	3323	5.58758	3640	5.58767	3760	5.58753	3755	5.58758	3180	5.58768	3688			5.58765	3668	5.58772	4762	5.58765	4116	5.58773	4371	5.58758	3468	5.58773	3110			5.5875	4295	5.58753	4001	5.58747	3604	5.58747	3786	5.58747	4618	5.58773	4593
5.59413	3430	5.59405	3605	5.59413	3711	5.594	3631	5.59405	3474	5.59415	3434			5.59413	3501	5.59418	3553	5.59413	3742	5.5942	3804	5.59405	3918	5.5942	4190			5.59397	4337	5.594	4256	5.59393	4269	5.59393	3651	5.59393	5656	5.5942	4591
5.6006	3122	5.60053	3896	5.6006	3365	5.60048	3240	5.60052	3419	5.60062	3389			5.6006	3482	5.60065	3577	5.6006	4129	5.60067	3846	5.60052	4071	5.60067	3454			5.60043	4037	5.60047	3855	5.6004	3393	5.6004	4349	5.6004	4770	5.60067	4750
5.60707	3598	5.607	3351	5.60707	3770	5.60695	3396	5.60698	3463	5.60708	3297			5.60707	3747	5.60712	4110	5.60707	3927	5.60713	4463	5.60698	3382	5.60713	4079			5.6069	4444	5.60693	4172	5.60687	3920	5.60687	4541	5.60687	4195	5.60715	4800
5.61353	3563	5.61347	3438	5.61355	3862	5.61342	3537	5.61345	3336	5.61355	3306			5.61353	3758	5.61358	3716	5.61353	3399	5.6136	3732	5.61345	3768	5.6136	3755			5.61338	4256	5.6134	4252	5.61333	3471	5.61333	3931	5.61333	4494	5.61362	4947
5.62	3543	5.61993	3913	5.62002	3561	5.61988	3559	5.61992	3441	5.62003	3477			5.62	4102	5.62005	4049	5.62	3509	5.62007	3495	5.61992	3782	5.62007	3492			5.61985	4092	5.61987	5052	5.6198	3396	5.6198	3718	5.6198	4502	5.62008	5353
5.62647	3656	5.6264	3389	5.62648	3441	5.62635	3630	5.62638	3072	5.6265	4320			5.62647	3468	5.62653	3673	5.62647	4083	5.62653	3498	5.62638	3733	5.62655	4023			5.62632	3766	5.62633	4297	5.62627	3401	5.62627	3963	5.62627	4912	5.62655	4887
5.63295	3315	5.63287	3649	5.63295	3932	5.63282	3205	5.63285	3490	5.63297	7100			5.63293	3853	5.633	4013	5.63293	3792	5.63302	4136	5.63285	3657	5.63302	4795			5.63278	3571	5.63282	3485	5.63275	3126	5.63273	3755	5.63273	5225	5.63302	3952
5.63942	3096	5.63933	3447	5.63942	3350	5.63928	3713	5.63933	3340	5.63943	7219			5.6394	4301	5.63947	4013	5.6394	3759	5.63948	3933	5.63933	4331	5.63948	3998			5.63925	3671	5.63928	3953	5.63922	4151	5.63922	4188	5.63922	3679	5.63948	5050
5.64588	3134	5.6458	3250	5.64588	3433	5.64575	2929	5.6458	3556	5.6459	6799			5.64587	3739	5.64593	4598	5.64588	3754	5.64595	3717	5.6458	4485	5.64595	3718			5.64572	3826	5.64575	4361	5.64568	3759	5.64568	4331	5.64568	4163	5.64595	5392
5.65235	3483	5.65227	3715	5.65235	3291	5.65223	3511	5.65227	3170	5.65237	7656			5.65235	3812	5.6524	3295	5.65235	3830	5.65242	4010	5.65227	3939	5.65242	3746			5.65218	3635	5.65222	3833	5.65215	3593	5.65215	4339	5.65215	4005	5.65242	4978
5.65882	3257	5.65875	4081	5.65882	3567	5.6587	3461	5.65873	3115	5.65883	6186			5.65882	4111	5.65887	3941	5.65882	4142	5.65888	3982	5.65873	4119	5.65888	3332			5.65865	3642	5.65868	4481	5.65862	3934	5.65862	4102	5.65862	3956	5.6589	4972
5.66528	2871	5.66522	3400	5.6653	3661	5.66517	3270	5.6652	3130	5.6653	6186			5.66528	4029	5.66533	3798	5.66528	3405	5.66535	3251	5.6652	3566	5.66535	3817			5.66512	3490	5.66515	4085	5.66508	3331	5.66508	4432	5.66508	4435	5.66537	4318
5.67175	3515	5.67168	4340	5.67177	3397	5.67163	2946	5.67167	3444	5.67178	7404			5.67175	3788	5.6718	3882	5.67175	3969	5.67182	4102	5.67167	3228	5.67182	3526			5.6716	4184	5.67162	3583	5.67155	3499	5.67155	4056	5.67155	4957	5.67183	4518
5.67822	3037	5.67815	3810	5.67823	3792	5.6781	3696	5.67813	3271	5.67825	7620			5.67822	3755	5.67828	3444	5.67822	3653	5.67828	4147	5.67813	3926	5.67828	3721			5.67807	3559	5.67808	3633	5.67802	4126	5.67802	3759	5.67802	4169	5.6783	4310
5.6847	3338	5.68462	3059	5.6847	3665	5.68457	3163	5.6846	2956	5.68472	5786			5.68468	3777	5.68475	4096	5.68468	3883	5.68477	3978	5.6846	3999	5.68477	3393			5.68453	3633	5.68455	3319	5.6845	3268	5.68448	3891	5.68448	5185	5.68477	5195
5.69117	3485	5.69108	3281	5.69117	3157	5.69103	3513	5.69108	3520	5.69118	7925			5.69115	3870	5.69122	3625	5.69115	3998	5.69123	3626	5.69108	3914	5.69123	3587			5.691	3540	5.69103	4081	5.69097	3823	5.69097	4332	5.69097	4142	5.69123	4730
5.69763	2958	5.69755	3786	5.69763	3361	5.6975	3455	5.69755	3814	5.69765	5479			5.69762	3633	5.69768	3787	5.69763	3566	5.6977	4125	5.69755	4319	5.6977	3460			5.69747	3517	5.6975	4168	5.69743	3498	5.69743	4809	5.69743	5037	5.6977	6988
5.7041	3495	5.70402	3510	5.7041	3773	5.70397	3625	5.70402	3399	5.70412	7410			5.7041	3673	5.70415	4312	5.7041	4416	5.70417	4097	5.70402	3447	5.70417	3466			5.70393	3651	5.70397	4445	5.7039	4080	5.7039	4078	5.7039	4889	5.70417	9195
5.71057	3303	5.7105	3310	5.71057	3363	5.71045	3585	5.71048	3375	5.71058	7042			5.71057	3726	5.71062	4186	5.71057	3621	5.71063	3670	5.71048	3808	5.71063	3523			5.7104	2868	5.71043	4348	5.71037	3662	5.71037	5644	5.71037	6185	5.71063	10614
5.71703	3333	5.71697	3156	5.71705	3624	5.71692	3223	5.71695	3390	5.71705	7962			5.71703	3699	5.71708	4226	5.71703	4062	5.7171	4344	5.71695	4877	5.7171	3628			5.71687	3938	5.7169	4443	5.71683	3468	5.71683	6288	5.71683	6746	5.71712	10711
5.7235	2908	5.72343	4183	5.72352	3400	5.72338	3879	5.72342	3402	5.72352	7819			5.7235	4213	5.72355	4560	5.7235	3487	5.72357	3718	5.72342	3810	5.72357	3607			5.72335	3784	5.72337	4323	5.7233	3845	5.7233	6308	5.7233	7086	5.72358	11921
5.72997	3381	5.7299	3322	5.72998	3587	5.72985	3342	5.72988	3067	5.73	8382			5.72997	4159	5.73003	4162	5.72997	3934	5.73003	3509	5.72988	3948	5.73003	4024			5.72982	4341	5.72983	4628	5.72977	3721	5.72977	6812	5.72977	7295	5.73005	10578
5.73643	3269	5.73637	3591	5.73645	4056	5.73632	3210	5.73635	3593	5.73647	6549			5.73643	3850	5.7365	4312	5.73643	3439	5.73652	3901	5.73635	5033	5.73652	3571			5.73628	4893	5.7363	4475	5.73623	3280	5.73623	6707	5.73623	7258	5.73652	9122
5.74292	2881	5.74283	3149	5.74292	3787	5.74278	3139	5.74283	3553	5.74293	8284			5.7429	4608	5.74297	4130	5.7429	3229	5.74298	3935	5.74283	4471	5.74298	3772			5.74275	4565	5.74278	4828	5.74272	3871	5.7427	5978	5.7427	8313	5.74298	9534
5.74938	3797	5.7493	3689	5.74938	3343	5.74925	3575	5.7493	3291	5.7494	5373			5.74937	3528	5.74943	4465	5.74937	4076	5.74945	4588	5.7493	5582	5.74945	4063			5.74922	4768	5.74925	3655	5.74918	3518	5.74918	5918	5.74918	7984	5.74945	7333
5.75585	3234	5.75577	2999	5.75585	3720	5.75572	4013	5.75577	2929	5.75587	8096			5.75585	4482	5.7559	4677	5.75585	3732	5.75592	3999	5.75577	5502	5.75592	4327			5.75568	3943	5.75572	4255	5.75565	3567	5.75565	5999	5.75565	9599	5.75592	7021
5.76232	2971	5.76223	3463	5.76232	3933	5.7622	3715	5.76223	3377	5.76233	7809			5.76232	4152	5.76237	4303	5.76232	3314	5.76238	3635	5.76223	5434	5.76238	3225			5.76215	4805	5.76218	3796	5.76212	4004	5.76212	6358	5.76212	9956	5.76238	6918
5.76878	3760	5.76872	4110	5.76878	5021	5.76867	3486	5.7687	3757	5.7688	6664			5.76878	4978	5.76883	4038	5.76878	3440	5.76885	3690	5.7687	6834	5.76885	4214			5.76862	4656	5.76865	5209	5.76858	4294	5.76858	7173	5.76858	10705	5.76887	6310
5.77525	3728	5.77518	3701	5.77527	5953	5.77513	3378	5.77517	3991	5.77527	8126			5.77525	4291	5.7753	4396	5.77525	4148	5.77532	4946	5.77517	7671	5.77532	3518			5.77508	5540	5.77512	4188	5.77505	4897	5.77505	6659	5.77505	11323	5.77533	6981
5.78172	4382	5.78165	3710	5.78173	5914	5.7816	4424	5.78163	4034	5.78175	6252			5.78172	4619	5.78177	5063	5.78172	4070	5.78178	4317	5.78163	6696	5.78178	3634			5.78157	5606	5.78158	5123	5.78152	5883	5.78152	6220	5.78152	10285	5.7818	6135
5.78818	3823	5.78812	4006	5.7882	6870	5.78807	3966	5.7881	3741	5.78822	8435			5.78818	4442	5.78825	4443	5.78818	4032	5.78825	4547	5.7881	6327	5.78827	3886			5.78803	5776	5.78805	4435	5.78798	6099	5.78798	5816	5.78798	9322	5.78827	6039
5.79467	3693	5.79458	4098	5.79467	6236	5.79453	3999	5.79457	3969	5.79468	5772			5.79465	4832	5.79472	4703	5.79465	4561	5.79473	4376	5.79457	6399	5.79473	3679			5.7945	6449	5.79452	5013	5.79447	6049	5.79445	6374	5.79445	8394	5.79473	6254
5.80113	3723	5.80105	4705	5.80113	5701	5.801	3794	5.80105	4552	5.80115	8038			5.80112	4912	5.80118	4174	5.80112	3847	5.8012	4080	5.80105	5505	5.8012	3942			5.80097	5372	5.801	4942	5.80093	5129	5.80093	6028	5.80093	7457	5.8012	5626
5.8076	3574	5.80752	4501	5.8076	4538	5.80747	3488	5.80752	4412	5.80762	7823			5.80758	4095	5.80765	4727	5.8076	4291	5.80767	3966	5.80752	5750	5.80767	4206			5.80743	4347	5.80747	4273	5.8074	5547	5.8074	4403	5.8074	6917	5.80767	5486
5.81407	3519	5.81398	4064	5.81407	5131	5.81393	4060	5.81398	3271	5.81408	7594			5.81407	3730	5.81412	4174	5.81407	3652	5.81413	3732	5.81398	4266	5.81413	3405			5.8139	5068	5.81393	3918	5.81387	4185	5.81387	4649	5.81387	5966	5.81413	5181
5.82053	3639	5.82047	3546	5.82053	4409	5.82042	4100	5.82045	3699	5.82055	7725			5.82053	4442	5.82058	3716	5.82053	4093	5.8206	4043	5.82045	4395	5.8206	3435			5.82037	3598	5.8204	3688	5.82033	4335	5.82033	4868	5.82033	5042	5.8206	5096
5.827	2961	5.82693	3683	5.82702	3742	5.82688	3705	5.82692	2742	5.82702	6916			5.827	3623	5.82705	3774	5.827	3594	5.82707	3485	5.82692	3838	5.82707	3548			5.82683	4529	5.82687	3871	5.8268	3907	5.8268	4494	5.8268	5196	5.82708	4487
5.83347	3572	5.8334	3620	5.83348	3607	5.83335	3913	5.83338	2918	5.8335	7804			5.83347	4717	5.83352	3721	5.83347	3303	5.83353	4034	5.83338	3772	5.83353	3723			5.83332	4049	5.83333	4146	5.83327	3406	5.83327	4499	5.83327	5025	5.83355	4641
5.83993	3491	5.83987	3521	5.83995	3701	5.83982	3819	5.83985	3517	5.83997	5594			5.83993	3687	5.84	4430	5.83993	3727	5.84	3374	5.83985	4431	5.84	3473			5.83978	3573	5.8398	4805	5.83973	4500	5.83973	3717	5.83973	5573	5.84002	4478
5.8464	3236	5.84633	3460	5.84642	3536	5.84628	3692	5.84632	2810	5.84643	7554			5.8464	3830	5.84647	4819	5.8464	4315	5.84648	3407	5.84632	5223	5.84648	3711			5.84625	3553	5.84627	4178	5.8462	3649	5.8462	4230	5.8462	4732	5.84648	4603
5.85288	3499	5.8528	3061	5.85288	3642	5.85275	3454	5.8528	3141	5.8529	5871			5.85287	3514	5.85293	4157	5.85287	3926	5.85295	3602	5.8528	3905	5.85295	3980			5.85272	4025	5.85275	3392	5.85268	4277	5.85267	4277	5.85267	4685	5.85295	4813
5.85935	3443	5.85927	4501	5.85935	4096	5.85922	3169	5.85927	3582	5.85937	7367			5.85933	3218	5.8594	4245	5.85933	3589	5.85942	3657	5.85927	3524	5.85942	3895			5.85918	3553	5.85922	3597	5.85915	3436	5.85915	4564	5.85915	5005	5.85942	4222
5.86582	3726	5.86573	3592	5.86582	3131	5.86568	3459	5.86573	3200	5.86583	7068			5.86582	3463	5.86587	3866	5.86582	3779	5.86588	3517	5.86573	4187	5.86588	3964			5.86565	3894	5.86568	4507	5.86562	3411	5.86562	4655	5.86562	4592	5.86588	4431
5.87228	3304	5.8722	3639	5.87228	3965	5.87217	3711	5.8722	3294	5.8723	7208			5.87228	3912	5.87233	3943	5.87228	4184	5.87235	3515	5.8722	3327	5.87235	3142			5.87212	3928	5.87215	3907	5.87208	3854	5.87208	3626	5.87208	4061	5.87235	4684
5.87875	3039	5.87868	2857	5.87875	3579	5.87863	3881	5.87867	3238	5.87877	7185			5.87875	3524	5.8788	4596	5.87875	3474	5.87882	4507	5.87867	3699	5.87882	3376			5.87858	3565	5.87862	3281	5.87855	3005	5.87855	3613	5.87855	4453	5.87883	4320
5.88522	3003	5.88515	3518	5.88523	3294	5.8851	3284	5.88513	3531	5.88523	6297			5.88522	3315	5.88527	4420	5.88522	3861	5.88528	3466	5.88513	4219	5.88528	3590			5.88505	3755	5.88508	3779	5.88502	4197	5.88502	4452	5.88502	4536	5.8853	4360
5.89168	3679	5.89162	3130	5.8917	3293	5.89157	3704	5.8916	3127	5.89172	7267			5.89168	3428	5.89173	3751	5.89168	4255	5.89175	3940	5.8916	4608	5.89175	3218			5.89153	3967	5.89155	3720	5.89148	3804	5.89148	3548	5.89148	4298	5.89177	4759
5.89815	3280	5.89808	3616	5.89817	4037	5.89803	3270	5.89807	3794	5.89818	6219			5.89815	4028	5.89822	3578	5.89815	4068	5.89822	3648	5.89807	3916	5.89823	3512			5.898	4060	5.89802	3951	5.89795	3492	5.89795	3414	5.89795	4171	5.89823	3976
5.90463	3373	5.90455	3834	5.90463	3579	5.9045	3288	5.90453	3614	5.90465	7268			5.90462	3359	5.90468	4614	5.90462	3606	5.9047	4195	5.90453	4112	5.9047	3370			5.90447	3964	5.90448	4419	5.90443	3745	5.90442	3696	5.90442	3730	5.9047	3954
5.9111	3105	5.91102	3625	5.9111	3652	5.91097	4023	5.91102	3585	5.91112	5087			5.91108	3939	5.91115	3988	5.91108	4141	5.91117	3833	5.91102	3802	5.91117	4098			5.91093	3728	5.91097	3722	5.9109	4083	5.9109	4390	5.9109	4754	5.91117	4053
5.91757	3286	5.91748	3046	5.91757	4013	5.91743	3669	5.91748	3298	5.91758	6860			5.91755	3700	5.91762	3569	5.91757	3609	5.91763	3248	5.91748	3655	5.91763	3466			5.9174	3599	5.91743	3766	5.91737	3857	5.91737	3620	5.91737	4042	5.91763	4326
5.92403	3421	5.92395	3681	5.92403	3521	5.92392	3617	5.92395	3561	5.92405	7385			5.92403	4017	5.92408	3387	5.92403	3413	5.9241	3618	5.92395	3668	5.9241	3648			5.92387	4017	5.9239	3706	5.92383	3760	5.92383	4346	5.92383	4198	5.9241	4555
5.9305	3493	5.93043	3650	5.9305	3665	5.93038	3546	5.93042	3250	5.93052	6680			5.9305	3534	5.93055	4438	5.9305	3666	5.93057	3695	5.93042	3282	5.93057	3855			5.93033	3459	5.93037	4856	5.9303	3524	5.9303	4149	5.9303	5161	5.93057	4705
5.93697	3285	5.9369	3929	5.93698	4002	5.93685	3485	5.93688	3409	5.93698	4234			5.93697	3719	5.93702	4630	5.93697	3212	5.93703	3821	5.93688	4052	5.93703	3332			5.9368	4122	5.93683	7314	5.93677	3768	5.93677	4690	5.93677	5775	5.93705	5024
5.94343	3609	5.94337	4006	5.94345	4046	5.94332	4223	5.94335	3811	5.94347	8629			5.94343	3999	5.94348	3858	5.94343	3372	5.9435	3827	5.94335	4242	5.9435	4030			5.94328	4907	5.9433	10862	5.94323	4262	5.94323	5549	5.94323	8989	5.94352	7258
5.9499	3782	5.94983	5036	5.94992	3460	5.94978	4812	5.94982	5270	5.94993	9443			5.9499	3971	5.94997	5098	5.9499	3985	5.94997	4427	5.94982	5567	5.94997	3424			5.94975	6136	5.94977	16974	5.9497	4847	5.9497	7407	5.9497	12519	5.94998	8657
5.95637	4572	5.9563	6275	5.95638	3802	5.95625	4235	5.95628	7232	5.9564	10810			5.95637	4337	5.95643	5475	5.95637	3651	5.95645	4862	5.95628	6283	5.95645	4290			5.95622	7020	5.95623	24798	5.95618	4968	5.95617	9993	5.95617	17805	5.95645	12104
5.96285	4614	5.96277	6670	5.96285	3667	5.96272	5632	5.96277	8650	5.96287	11140			5.96283	4662	5.9629	5970	5.96283	3912	5.96292	5079	5.96277	6560	5.96292	3464			5.96268	8483	5.96272	30220	5.96265	5375	5.96263	11323	5.96263	22557	5.96292	14096
5.96932	5251	5.96923	7186	5.96932	3653	5.96918	5081	5.96923	8951	5.96933	13261			5.9693	5112	5.96937	6688	5.9693	3840	5.96938	4665	5.96923	7741	5.96938	3771			5.96915	10489	5.96918	30921	5.96912	5501	5.96912	12239	5.96912	24836	5.96938	16050
5.97578	4791	5.9757	6309	5.97578	3787	5.97565	5282	5.9757	9016	5.9758	9226			5.97578	4078	5.97583	5662	5.97578	4014	5.97585	4661	5.9757	6152	5.97585	3712			5.97562	9571	5.97565	28833	5.97558	6059	5.97558	10641	5.97558	21779	5.97585	15706
5.98225	4869	5.98218	5587	5.98225	4361	5.98213	4984	5.98217	7426	5.98227	11269			5.98225	4924	5.9823	5634	5.98225	4145	5.98232	4242	5.98217	5763	5.98232	3756			5.98208	9694	5.98212	24540	5.98205	5218	5.98205	8584	5.98205	19900	5.98232	14170
5.98872	3792	5.98865	5469	5.98872	3837	5.9886	4529	5.98863	5164	5.98873	6734			5.98872	4541	5.98877	4788	5.98872	3662	5.98878	4528	5.98863	4137	5.98878	3775			5.98855	8038	5.98858	17528	5.98852	4466	5.98852	7833	5.98852	14838	5.9888	12242
5.99518	3325	5.99512	4715	5.9952	3847	5.99507	3813	5.9951	4311	5.9952	9181			5.99518	4699	5.99523	4240	5.99518	3340	5.99525	3908	5.9951	4468	5.99525	3833			5.99502	6786	5.99505	12408	5.99498	4422	5.99498	6929	5.99498	11411	5.99527	9665
6.00165	3392	6.00158	3703	6.00167	3156	6.00153	3665	6.00157	3489	6.00168	8532			6.00165	3081	6.0017	3985	6.00165	3633	6.00172	3674	6.00157	3806	6.00172	3772			6.0015	5811	6.00152	8694	6.00145	3613	6.00145	5527	6.00145	9002	6.00173	8557
6.00812	3460	6.00805	4099	6.00813	3275	6.008	3477	6.00803	3625	6.00815	7490			6.00812	3647	6.00818	3679	6.00812	3857	6.00818	3612	6.00803	3995	6.0082	3457			6.00797	4910	6.00798	6984	6.00792	3436	6.00792	5188	6.00792	7929	6.0082	7254
6.0146	3422	6.01452	3627	6.0146	3915	6.01447	4023	6.0145	3278	6.01462	7653			6.01458	3506	6.01465	4323	6.01458	4527	6.01467	4050	6.0145	4019	6.01467	3509			6.01443	4663	6.01445	5632	6.0144	4512	6.01438	4738	6.01438	7954	6.01467	7490
6.02107	3303	6.02098	3660	6.02107	3597	6.02093	3873	6.02098	3003	6.02108	6023			6.02105	3769	6.02112	3961	6.02105	4232	6.02113	3831	6.02098	3780	6.02113	4251			6.0209	4513	6.02093	6895	6.02087	4112	6.02087	5257	6.02087	7538	6.02113	7545
6.02753	3218	6.02745	3842	6.02753	4266	6.0274	4091	6.02745	3723	6.02755	7400			6.02752	3607	6.02758	4514	6.02753	4471	6.0276	4005	6.02745	3894	6.0276	3648			6.02737	4009	6.0274	5289	6.02733	4617	6.02733	4897	6.02733	6971	6.0276	6637
6.034	3697	6.03392	3933	6.034	3803	6.03388	3956	6.03392	3573	6.03402	7551			6.034	3927	6.03405	4391	6.034	5440	6.03407	3645	6.03392	4246	6.03407	3531			6.03383	4134	6.03387	4994	6.0338	4783	6.0338	5431	6.0338	6984	6.03407	5819
6.04047	3233	6.0404	3953	6.04047	4044	6.04035	3769	6.04038	2893	6.04048	7346			6.04047	4106	6.04052	3957	6.04047	5098	6.04053	3544	6.04038	3493	6.04053	3535			6.0403	4317	6.04033	5637	6.04027	5101	6.04027	4901	6.04027	6661	6.04055	5645
6.04693	3510	6.04687	3516	6.04695	3435	6.04682	3939	6.04685	3533	6.04695	8064			6.04693	4283	6.04698	3783	6.04693	4206	6.047	3818	6.04685	3901	6.047	3672			6.04677	4130	6.0468	4656	6.04673	4748	6.04673	4970	6.04673	5397	6.04702	5263
6.0534	3172	6.05333	3557	6.05342	3937	6.05328	3978	6.05332	2940	6.05343	5726			6.0534	4150	6.05345	3892	6.0534	5080	6.05347	3521	6.05332	3171	6.05347	4029			6.05325	4128	6.05327	4352	6.0532	5245	6.0532	4564	6.0532	5130	6.05348	4728
6.05987	3217	6.0598	3576	6.05988	3920	6.05975	3767	6.05978	2942	6.0599	6124			6.05987	3982	6.05993	4190	6.05987	4256	6.05993	4159	6.05978	3617	6.05993	3614			6.05972	3591	6.05973	4007	6.05967	4256	6.05967	4229	6.05967	4621	6.05995	4675
6.06633	3257	6.06627	3724	6.06635	3944	6.06622	3408	6.06625	3503	6.06637	5312			6.06633	3624	6.0664	4230	6.06633	4304	6.06642	4009	6.06625	3763	6.06642	3532			6.06618	3628	6.0662	4266	6.06615	4506	6.06613	4703	6.06613	4936	6.06642	4856
6.07282	3320	6.07273	3840	6.07282	3617	6.07268	3624	6.07273	3210	6.07283	7225			6.0728	3851	6.07287	3967	6.0728	4275	6.07288	3577	6.07273	3444	6.07288	3690			6.07265	3998	6.07268	4418	6.07262	4218	6.0726	4048	6.0726	4672	6.07288	4861
6.07928	3122	6.0792	3688	6.07928	4197	6.07915	3881	6.0792	3345	6.0793	6057			6.07927	3560	6.07933	4101	6.07927	4186	6.07935	4283	6.0792	4488	6.07935	3438			6.07912	3591	6.07915	3772	6.07908	4294	6.07908	4600	6.07908	4882	6.07935	4417
6.08575	3518	6.08567	3464	6.08575	4205	6.08562	3926	6.08567	3025	6.08577	7883			6.08575	3936	6.0858	3276	6.08575	4118	6.08582	3965	6.08567	3630	6.08582	3019			6.08558	4649	6.08562	4441	6.08555	4038	6.08555	4812	6.08555	4007	6.08582	4284
6.09222	3430	6.09215	3838	6.09222	3464	6.0921	3564	6.09213	2824	6.09223	7156			6.09222	3733	6.09227	3746	6.09222	4031	6.09228	3980	6.09213	3516	6.09228	3598			6.09205	3729	6.09208	4449	6.09202	4302	6.09202	4964	6.09202	4818	6.09228	4048
6.09868	3643	6.09862	3705	6.09868	3735	6.09857	4029	6.0986	3269	6.0987	6853			6.09868	3940	6.09873	4164	6.09868	4098	6.09875	3913	6.0986	3272	6.09875	3350			6.09852	3681	6.09855	3774	6.09848	4142	6.09848	4533	6.09848	4360	6.09877	4134
6.10515	3008	6.10508	3395	6.10517	3918	6.10503	3901	6.10507	3381	6.10517	7746			6.10515	3230	6.1052	3506	6.10515	4038	6.10522	4108	6.10507	3430	6.10522	3841			6.105	3444	6.10502	4373	6.10495	4053	6.10495	3911	6.10495	4730	6.10523	4448
6.11162	3909	6.11155	3551	6.11163	3793	6.1115	3688	6.11153	3559	6.11165	5228			6.11162	4953	6.11167	3738	6.11162	4589	6.11168	3872	6.11153	3028	6.11168	3465			6.11147	4033	6.11148	3648	6.11142	4291	6.11142	3967	6.11142	4399	6.1117	4854
6.11808	3585	6.11802	3681	6.1181	4095	6.11797	3419	6.118	3585	6.11812	7296			6.11808	3893	6.11815	3907	6.11808	3959	6.11815	4206	6.118	3157	6.11817	3511			6.11793	4261	6.11795	3788	6.11788	4739	6.11788	4713	6.11788	4261	6.11817	4525
6.12457	4021	6.12448	3893	6.12457	4026	6.12443	3854	6.12447	3244	6.12458	5332			6.12455	3729	6.12462	4366	6.12455	3882	6.12463	3888	6.12447	3911	6.12463	3420			6.1244	3679	6.12442	3549	6.12437	4903	6.12435	4250	6.12435	4082	6.12463	4259
6.13103	3215	6.13095	3656	6.13103	3821	6.1309	3689	6.13095	2834	6.13105	7335			6.13102	3798	6.13108	4576	6.13102	3909	6.1311	4287	6.13095	4025	6.1311	3899			6.13087	3785	6.1309	3307	6.13083	4383	6.13083	4280	6.13083	4350	6.1311	4099
6.1375	3523	6.13742	3808	6.1375	3816	6.13737	3589	6.13742	3094	6.13752	6051			6.13748	3622	6.13755	3331	6.1375	4045	6.13757	4271	6.13742	3862	6.13757	3172			6.13733	3483	6.13737	4120	6.1373	4617	6.1373	4055	6.1373	4320	6.13757	4287
6.14397	3305	6.14388	3237	6.14397	3265	6.14385	3918	6.14388	3596	6.14398	3540			6.14397	3591	6.14402	3986	6.14397	4454	6.14403	4069	6.14388	3913	6.14403	3449			6.1438	3873	6.14383	4107	6.14377	4732	6.14377	4535	6.14377	3939	6.14403	4146
6.15043	3277	6.15037	3601	6.15043	3513	6.15032	3848	6.15035	3569	6.15045	3611			6.15043	3548	6.15048	3905	6.15043	3643	6.1505	4106	6.15035	3460	6.1505	3765			6.15027	3439	6.1503	3763	6.15023	4681	6.15023	3759	6.15023	4018	6.15052	3803
6.1569	3799	6.15683	3363	6.15692	3530	6.15678	3670	6.15682	3331	6.15692	3422			6.1569	3912	6.15695	3852	6.1569	3884	6.15697	3958	6.15682	4214	6.15697	3224			6.15673	3844	6.15677	3685	6.1567	4704	6.1567	4283	6.1567	4433	6.15698	4171
6.16337	3158	6.1633	3840	6.16338	3755	6.16325	3039	6.16328	3560	6.1634	3206			6.16337	3328	6.16342	3543	6.16337	3923	6.16343	4636	6.16328	3731	6.16343	3501			6.16322	4126	6.16323	4205	6.16317	4000	6.16317	3615	6.16317	4572	6.16345	4003
6.16983	3383	6.16977	3642	6.16985	3628	6.16972	4367	6.16975	3186	6.16987	3086			6.16983	3837	6.1699	3275	6.16983	4032	6.1699	4138	6.16975	3597	6.1699	3496			6.16968	3810	6.1697	3939	6.16963	3957	6.16963	4097	6.16963	4251	6.16992	4663
6.17632	3298	6.17623	3294	6.17632	4011	6.17618	3188	6.17622	3258	6.17633	3502			6.1763	3911	6.17637	4419	6.1763	4105	6.17638	4224	6.17622	3768	6.17638	2943			6.17615	3960	6.17617	3530	6.17612	3882	6.1761	4557	6.1761	4111	6.17638	4450
6.18278	3438	6.1827	4052	6.18278	4367	6.18265	3629	6.1827	3858	6.1828	3469			6.18277	3793	6.18283	3931	6.18277	3622	6.18285	4348	6.1827	3800	6.18285	3983			6.18262	3471	6.18265	3505	6.18258	3868	6.18257	4190	6.18257	4360	6.18285	3810
6.18925	3845	6.18917	3404	6.18925	3999	6.18912	3904	6.18917	3217	6.18927	3203			6.18923	3869	6.1893	3741	6.18923	3863	6.18932	4465	6.18917	3805	6.18932	3819			6.18908	4253	6.18912	3725	6.18905	4128	6.18905	4243	6.18905	3813	6.18932	3813
6.19572	3172	6.19563	3643	6.19572	3732	6.19558	3531	6.19563	3083	6.19573	3418			6.19572	3324	6.19577	3601	6.19572	3900	6.19578	4273	6.19563	3637	6.19578	2922			6.19555	3834	6.19558	3874	6.19552	3980	6.19552	4593	6.19552	4304	6.19578	4081
6.20218	3602	6.20212	3553	6.20218	3576	6.20207	3877	6.2021	2988	6.2022	3533			6.20218	3842	6.20223	3498	6.20218	3994	6.20225	4014	6.2021	2861	6.20225	3932			6.20202	3915	6.20205	3400	6.20198	3648	6.20198	4856	6.20198	3805	6.20225	4350
6.20865	3289	6.20858	3440	6.20865	3877	6.20853	4024	6.20857	3049	6.20867	3370			6.20865	3734	6.2087	4285	6.20865	4533	6.20872	4562	6.20857	3772	6.20872	3546			6.20848	3929	6.20852	3934	6.20845	3699	6.20845	4043	6.20845	3995	6.20873	4434
6.21512	2837	6.21505	3951	6.21513	3633	6.215	4110	6.21503	3252	6.21513	3087			6.21512	3517	6.21517	3914	6.21512	3771	6.21518	3900	6.21503	3472	6.21518	3199			6.21497	3704	6.21498	3924	6.21492	3706	6.21492	4457	6.21492	3547	6.2152	4827
6.22158	3402	6.22152	3752	6.2216	3787	6.22147	3725	6.2215	3268	6.22162	3405			6.22158	3328	6.22163	3487	6.22158	3860	6.22165	3442	6.2215	3813	6.22165	3455			6.22143	3651	6.22145	3370	6.22138	3647	6.22138	4223	6.22138	4402	6.22167	4128
6.22805	3902	6.22798	3775	6.22807	3717	6.22793	3919	6.22797	3338	6.22808	3387			6.22805	3566	6.22812	4215	6.22805	3426	6.22812	3294	6.22797	3676	6.22813	3328			6.2279	3708	6.22792	3242	6.22785	3757	6.22785	4306	6.22785	4550	6.22813	4304
6.23453	3074	6.23445	3704	6.23453	3248	6.2344	3307	6.23443	3197	6.23455	3360			6.23452	3765	6.23458	3761	6.23452	3958	6.2346	4350	6.23443	3980	6.2346	3434			6.23437	3900	6.23438	3579	6.23433	3451	6.23432	4804	6.23432	3953	6.2346	3881
6.241	3214	6.24092	3140	6.241	4036	6.24087	3508	6.24092	3085	6.24102	3037			6.24098	3798	6.24105	4409	6.24098	3956	6.24107	4808	6.24092	3762	6.24107	3686			6.24083	3695	6.24087	4448	6.2408	3884	6.2408	3695	6.2408	3616	6.24107	4579
6.24747	3285	6.24738	3620	6.24747	3740	6.24733	3374	6.24738	3305	6.24748	3586			6.24745	3608	6.24752	3909	6.24747	3618	6.24753	4200	6.24738	3582	6.24753	3179			6.2473	3605	6.24733	3491	6.24727	3793	6.24727	4141	6.24727	4221	6.24753	3924
6.25393	3058	6.25385	3655	6.25393	3902	6.25382	3306	6.25385	3637	6.25395	5475			6.25393	4151	6.25398	3711	6.25393	3313	6.254	4560	6.25385	3913	6.254	3463			6.25377	3898	6.2538	4000	6.25373	4313	6.25373	3947	6.25373	4566	6.254	4972
6.2604	2828	6.26033	3447	6.2604	4002	6.26028	3423	6.26032	2990	6.26042	7178			6.2604	4110	6.26045	3539	6.2604	3926	6.26047	3958	6.26032	3994	6.26047	3769			6.26023	4108	6.26027	3598	6.2602	4084	6.2602	3869	6.2602	3670	6.26048	3945
6.26687	3515	6.2668	3650	6.26688	3911	6.26675	3620	6.26678	2716	6.26688	7753			6.26687	3681	6.26692	3437	6.26687	3721	6.26693	4145	6.26678	2965	6.26693	3380			6.2667	3587	6.26673	3395	6.26667	3618	6.26667	4300	6.26667	4177	6.26695	4691
6.27333	3788	6.27327	2863	6.27335	3579	6.27322	3347	6.27325	3032	6.27337	4751			6.27333	3418	6.27338	3753	6.27333	4313	6.2734	4179	6.27325	3510	6.2734	3649			6.27318	3777	6.2732	3248	6.27313	3670	6.27313	3439	6.27313	3898	6.27342	4107
6.2798	3341	6.27973	3800	6.27982	4053	6.27968	3482	6.27972	2932	6.27983	7603			6.2798	3674	6.27987	4279	6.2798	3831	6.27987	3804	6.27972	3347	6.27987	3865			6.27965	3392	6.27967	3514	6.2796	4714	6.2796	3966	6.2796	3790	6.27988	3706
6.28628	2614	6.2862	3508	6.28628	3883	6.28615	3896	6.28618	3394	6.2863	7983			6.28627	3285	6.28633	3750	6.28627	4050	6.28635	3923	6.28618	2832	6.28635	3414			6.28612	3466	6.28613	3637	6.28608	4107	6.28607	4223	6.28607	3541	6.28635	3234
6.29275	2895	6.29267	3337	6.29275	3392	6.29262	3751	6.29267	2767	6.29277	7094			6.29273	3596	6.2928	3824	6.29273	3549	6.29282	4191	6.29267	3900	6.29282	3698			6.29258	3556	6.29262	3694	6.29255	3847	6.29255	3838	6.29255	4138	6.29282	3384
6.29922	3437	6.29913	3343	6.29922	3701	6.29908	4092	6.29913	3235	6.29923	7061			6.2992	3206	6.29927	4360	6.29922	3191	6.29928	3896	6.29913	3249	6.29928	3950			6.29905	3950	6.29908	3532	6.29902	3369	6.29902	4030	6.29902	4005	6.29928	3617
6.30568	3129	6.3056	3713	6.30568	3738	6.30555	3629	6.3056	2960	6.3057	7525			6.30568	3452	6.30573	3544	6.30568	4223	6.30575	4087	6.3056	3691	6.30575	4013			6.30552	3240	6.30555	4078	6.30548	3826	6.30548	4256	6.30548	3185	6.30575	4053
6.31215	3689	6.31208	3307	6.31215	3699	6.31203	3637	6.31207	3180	6.31217	5946			6.31215	3637	6.3122	3389	6.31215	3751	6.31222	4010	6.31207	3710	6.31222	4018			6.31198	3598	6.31202	3333	6.31195	3636	6.31195	3682	6.31195	3797	6.31222	3944
6.31862	2826	6.31855	3466	6.31863	3450	6.3185	3071	6.31853	3102	6.31863	7088			6.31862	3479	6.31867	3412	6.31862	3803	6.31868	4259	6.31853	3541	6.31868	3266			6.31845	3549	6.31848	3584	6.31842	3544	6.31842	3485	6.31842	4051	6.3187	4084
6.32508	3079	6.32502	3068	6.3251	3699	6.32497	3572	6.325	3652	6.3251	7959			6.32508	3821	6.32513	3311	6.32508	4044	6.32515	4176	6.325	3869	6.32515	3274			6.32493	3671	6.32495	3734	6.32488	3591	6.32488	4638	6.32488	3535	6.32517	3783
6.33155	3303	6.33148	3645	6.33157	4158	6.33143	3374	6.33147	2937	6.33158	6509			6.33155	3824	6.33162	3700	6.33155	3637	6.33162	3462	6.33147	3729	6.33162	3686			6.3314	3221	6.33142	3909	6.33135	3689	6.33135	3791	6.33135	3566	6.33163	3153
6.33802	3552	6.33795	3727	6.33803	3940	6.3379	3440	6.33793	2775	6.33805	8273			6.33802	3328	6.33808	3429	6.33802	3940	6.3381	3809	6.33793	3454	6.3381	3854			6.33787	3532	6.33788	3575	6.33782	4364	6.33782	3987	6.33782	3730	6.3381	3684
6.3445	3444	6.34442	3528	6.3445	3807	6.34437	4026	6.34442	3154	6.34452	5805			6.34448	3547	6.34455	4413	6.34448	3717	6.34457	4320	6.34442	3870	6.34457	3185			6.34433	3156	6.34437	3631	6.3443	3795	6.34428	3897	6.34428	3642	6.34457	4123
6.35097	3540	6.35088	3597	6.35097	3042	6.35083	3177	6.35088	3348	6.35098	7480			6.35095	3201	6.35102	3658	6.35095	3513	6.35103	4506	6.35088	3597	6.35103	4182			6.3508	3737	6.35083	3739	6.35077	3400	6.35077	3726	6.35077	4167	6.35103	3382
6.35743	3075	6.35735	3455	6.35743	4102	6.3573	3814	6.35735	3094	6.35745	7909			6.35743	3930	6.35748	3286	6.35743	4037	6.3575	3627	6.35735	3810	6.3575	3581			6.35727	3680	6.3573	3374	6.35723	4140	6.35723	3751	6.35723	3612	6.3575	3722
6.3639	3572	6.36382	3679	6.3639	3740	6.36378	4010	6.36382	3289	6.36392	5908			6.3639	3632	6.36395	3658	6.3639	3938	6.36397	3915	6.36382	3850	6.36397	3623			6.36373	3827	6.36377	3659	6.3637	3473	6.3637	3691	6.3637	3660	6.36397	3383
6.37037	3731	6.3703	3579	6.37037	4372	6.37025	3275	6.37028	3215	6.37038	8477			6.37037	3169	6.37042	3711	6.37037	3602	6.37043	3895	6.37028	3641	6.37043	3252			6.3702	3317	6.37023	3664	6.37017	3779	6.37017	4229	6.37017	4153	6.37045	3844
6.37683	3538	6.37677	3237	6.37685	3349	6.37672	4001	6.37675	3124	6.37685	5220			6.37683	3634	6.37688	4445	6.37683	3424	6.3769	3835	6.37675	2876	6.3769	3487			6.37667	3543	6.3767	3825	6.37663	3645	6.37663	4297	6.37663	3607	6.37692	4072
6.3833	3434	6.38323	3285	6.38332	3500	6.38318	3109	6.38322	3078	6.38333	7854			6.3833	3893	6.38335	3762	6.3833	4186	6.38337	4113	6.38322	4040	6.38337	2832			6.38315	3779	6.38317	4307	6.3831	4196	6.3831	3853	6.3831	3475	6.38338	3797
6.38977	3648	6.3897	3869	6.38978	3817	6.38965	4068	6.38968	3342	6.3898	6887			6.38977	3863	6.38983	3828	6.38977	3130	6.38983	3732	6.38968	4183	6.38985	3843			6.38962	4156	6.38963	3500	6.38957	4184	6.38957	3930	6.38957	4148	6.38985	3918
6.39625	3310	6.39617	3222	6.39625	4103	6.39612	3721	6.39615	3020	6.39627	6855			6.39623	3527	6.3963	3624	6.39623	3954	6.39632	3655	6.39615	3808	6.39632	3718			6.39608	3160	6.3961	3612	6.39605	3827	6.39603	3575	6.39603	3324	6.39632	3986
6.40272	3376	6.40263	3719	6.40272	3814	6.40258	3753	6.40263	3341	6.40273	7880			6.4027	3733	6.40277	3721	6.4027	3851	6.40278	4090	6.40263	3028	6.40278	3654			6.40255	3492	6.40258	3463	6.40252	4242	6.40252	3960	6.40252	3661	6.40278	4103
6.40918	3159	6.4091	3916	6.40918	3269	6.40905	2892	6.4091	3592	6.4092	6023			6.40917	3813	6.40923	3641	6.40918	3261	6.40925	3616	6.4091	3614	6.40925	3027			6.40902	3883	6.40905	3982	6.40898	3677	6.40898	3358	6.40898	3250	6.40925	4099
6.41565	3394	6.41557	3579	6.41565	3473	6.41552	2962	6.41557	3338	6.41567	7494			6.41565	3500	6.4157	3792	6.41565	3814	6.41572	3826	6.41557	3524	6.41572	3945			6.41548	3225	6.41552	3628	6.41545	3754	6.41545	3724	6.41545	3603	6.41572	3626
6.42212	3385	6.42205	3961	6.42212	3619	6.422	3479	6.42203	3592	6.42213	4966			6.42212	3599	6.42217	3867	6.42212	3479	6.42218	4214	6.42203	3248	6.42218	3461			6.42195	3440	6.42198	3541	6.42192	3748	6.42192	4119	6.42192	3183	6.42218	3313
6.42858	3242	6.42852	3533	6.4286	3291	6.42847	3381	6.4285	3626	6.4286	8027			6.42858	3594	6.42863	3415	6.42858	3576	6.42865	4289	6.4285	3698	6.42865	3338			6.42842	3659	6.42845	3679	6.42838	3753	6.42838	3708	6.42838	4075	6.42867	3315
6.43505	3319	6.43498	3765	6.43507	3806	6.43493	3406	6.43497	3535	6.43508	7162			6.43505	4190	6.4351	4021	6.43505	3526	6.43512	3883	6.43497	3271	6.43512	3716			6.4349	2951	6.43492	3436	6.43485	3700	6.43485	4321	6.43485	3214	6.43513	2789
6.44152	3145	6.44145	4001	6.44153	3316	6.4414	3061	6.44143	3808	6.44155	7401			6.44152	2797	6.44158	3871	6.44152	3524	6.44158	4013	6.44143	4026	6.44158	3372			6.44137	3719	6.44138	3751	6.44132	3112	6.44132	4073	6.44132	3528	6.4416	3688
6.44798	2930	6.44792	3452	6.448	3947	6.44787	3533	6.4479	2975	6.44802	7279			6.44798	3643	6.44805	3495	6.44798	3640	6.44807	3451	6.4479	2920	6.44807	3295			6.44783	3299	6.44785	3564	6.44778	3588	6.44778	4561	6.44778	3312	6.44807	3659
6.45447	3195	6.45438	3688	6.45447	3816	6.45433	3887	6.45438	2544	6.45448	5544			6.45445	3255	6.45452	4139	6.45445	3649	6.45453	3710	6.45438	3540	6.45453	3488			6.4543	3666	6.45433	3753	6.45427	3530	6.45425	3729	6.45425	4115	6.45453	3602
6.46093	2994	6.46085	3453	6.46093	3565	6.4608	3023	6.46085	3430	6.46095	6933			6.46092	3596	6.46098	3422	6.46092	3120	6.461	3122	6.46085	3116	6.461	3203			6.46077	3412	6.4608	3271	6.46073	3802	6.46073	3075	6.46073	3195	6.461	3249
6.4674	3135	6.46732	3209	6.4674	3354	6.46727	3162	6.46732	2798	6.46742	4571			6.4674	3477	6.46745	3688	6.4674	3688	6.46747	3351	6.46732	2702	6.46747	3060			6.46723	2741	6.46727	3236	6.4672	3825	6.4672	3351	6.4672	3361	6.46747	3490
6.47387	2954	6.47378	3174	6.47387	3779	6.47375	2718	6.47378	3503	6.47388	6943			6.47387	3675	6.47392	3269	6.47387	3376	6.47393	3051	6.47378	3293	6.47393	2879			6.4737	3143	6.47373	2812	6.47367	3607	6.47367	3252	6.47367	3537	6.47393	3208
6.48033	2798	6.48027	2959	6.48033	3474	6.48022	2844	6.48025	2828	6.48035	6835			6.48033	3452	6.48038	3294	6.48033	3397	6.4804	2861	6.48025	2940	6.4804	3523			6.48017	3341	6.4802	3324	6.48013	3328	6.48013	2730	6.48013	3065	6.48042	3005
6.4868	3336	6.48673	3192	6.48682	2715	6.48668	2986	6.48672	3224	6.48682	6101			6.4868	3244	6.48685	3458	6.4868	3135	6.48687	2730	6.48672	3274	6.48687	2776			6.48663	2992	6.48667	3191	6.4866	3087	6.4866	2959	6.4866	3502	6.48688	3072
6.49327	3168	6.4932	3058	6.49328	3330	6.49315	2762	6.49318	2841	6.4933	7136			6.49327	2958	6.49332	3179	6.49327	3299	6.49333	2925	6.49318	3126	6.49333	2922			6.49312	2935	6.49313	3285	6.49307	3157	6.49307	3095	6.49307	3353	6.49335	3055
6.49973	3127	6.49967	3227	6.49975	3117	6.49962	3168	6.49965	3196	6.49977	5003			6.49973	3501	6.4998	3129	6.49973	3035	6.4998	3193	6.49965	2999	6.49982	2918			6.49958	3039	6.4996	3023	6.49953	3253	6.49953	2802	6.49953	3253	6.49982	3649
6.50622	2384	6.50613	2952	6.50622	3396	6.50608	2974	6.50612	2512	6.50623	6834			6.5062	3076	6.50627	3072	6.5062	3337	6.50628	3140	6.50612	3498	6.50628	3053			6.50605	3265	6.50607	3339	6.50602	3420	6.506	2841	6.506	3012	6.50628	4095
6.51268	2345	6.5126	3640	6.51268	3023	6.51255	3016	6.5126	2993	6.5127	5386			6.51267	2956	6.51273	3347	6.51267	3198	6.51275	3134	6.5126	2996	6.51275	2936			6.51252	2673	6.51255	3312	6.51248	3407	6.51248	2733	6.51248	3272	6.51275	4360
6.51915	3237	6.51907	3312	6.51915	3270	6.51902	2789	6.51907	2756	6.51917	6096			6.51913	3162	6.5192	2997	6.51915	3339	6.51922	3258	6.51907	3096	6.51922	2936			6.51898	2858	6.51902	3205	6.51895	3505	6.51895	2999	6.51895	3166	6.51922	4420
6.52562	2770	6.52553	3193	6.52562	3330	6.5255	3086	6.52553	2813	6.52563	6918			6.52562	3167	6.52567	3538	6.52562	3683	6.52568	3310	6.52553	3075	6.52568	3523			6.52545	2542	6.52548	3225	6.52542	3534	6.52542	3076	6.52542	2957	6.52568	4543
6.53208	2928	6.53202	3349	6.53208	3311	6.53197	2887	6.532	2926	6.5321	5080			6.53208	2680	6.53213	3338	6.53208	3344	6.53215	2610	6.532	3338	6.53215	3264			6.53192	3093	6.53195	3265	6.53188	3258	6.53188	2215	6.53188	3014	6.53215	4177
6.53855	3266	6.53848	3110	6.53857	3282	6.53843	2996	6.53847	2796	6.53857	6847			6.53855	3826	6.5386	3287	6.53855	2742	6.53862	3089	6.53847	2968	6.53862	2703			6.53838	2575	6.53842	3151	6.53835	3295	6.53835	3215	6.53835	3386	6.53863	4570
6.54502	2759	6.54495	3150	6.54503	3473	6.5449	2969	6.54493	2940	6.54505	5802			6.54502	2998	6.54507	3671	6.54502	3305	6.54508	3311	6.54493	2866	6.54508	3034			6.54487	3039	6.54488	3062	6.54482	2946	6.54482	3108	6.54482	3696	6.5451	4708
6.55148	3316	6.55142	2721	6.5515	3363	6.55137	2793	6.5514	3113	6.55152	6568			6.55148	3094	6.55155	3211	6.55148	3367	6.55155	3517	6.5514	2875	6.55155	3043			6.55133	3197	6.55135	2989	6.55128	3048	6.55128	2937	6.55128	3041	6.55157	4933
6.55795	2972	6.55788	3067	6.55797	2791	6.55783	2994	6.55787	3058	6.55798	6776			6.55795	2886	6.55802	3157	6.55795	3461	6.55803	3221	6.55787	2881	6.55803	3028			6.5578	2891	6.55782	3098	6.55777	3226	6.55775	2893	6.55775	3530	6.55803	4404
6.56443	2830	6.56435	3582	6.56443	3357	6.5643	2725	6.56435	3016	6.56445	5007			6.56442	3117	6.56448	3426	6.56442	3185	6.5645	2791	6.56435	3052	6.5645	3296			6.56427	3487	6.5643	3212	6.56423	3261	6.56422	3011	6.56422	3723	6.5645	4217
6.5709	3089	6.57082	3013	6.5709	3604	6.57077	3045	6.57082	2620	6.57092	6637			6.57088	3239	6.57095	3412	6.57088	3419	6.57097	2940	6.57082	3220	6.57097	3178			6.57073	3235	6.57077	3517	6.5707	3232	6.5707	3058	6.5707	4095	6.57097	4572
6.57737	2666	6.57728	3452	6.57737	3405	6.57723	2540	6.57728	2771	6.57738	4996			6.57737	3217	6.57742	3769	6.57737	3025	6.57743	2853	6.57728	2879	6.57743	3045			6.5772	3303	6.57723	3219	6.57717	3094	6.57717	3143	6.57717	3898	6.57743	4622
6.58383	2683	6.58375	3512	6.58383	3335	6.58372	2705	6.58375	3116	6.58385	6692			6.58383	3144	6.58388	3333	6.58383	3206	6.5839	2633	6.58375	3019	6.5839	3596			6.58367	2558	6.5837	3816	6.58363	2735	6.58363	2999	6.58363	4417	6.5839	4452
6.5903	2786	6.59023	3438	6.5903	3247	6.59018	2706	6.59022	2822	6.59032	6881			6.5903	3125	6.59035	3755	6.5903	3064	6.59037	3034	6.59022	2678	6.59037	2965			6.59013	2896	6.59017	4082	6.5901	3199	6.5901	2773	6.5901	3696	6.59038	3959
6.59677	3218	6.5967	3121	6.59678	3267	6.59665	3229	6.59668	2994	6.59678	6174			6.59677	3044	6.59682	3753	6.59677	3265	6.59683	3093	6.59668	2772	6.59683	3207			6.5966	3533	6.59663	3609	6.59657	3188	6.59657	2639	6.59657	3032	6.59685	3699
6.60323	3019	6.60317	3280	6.60325	2945	6.60312	2790	6.60315	3586	6.60327	7544			6.60323	3187	6.60328	3125	6.60323	2974	6.6033	2680	6.60315	3001	6.6033	3253			6.60308	3893	6.6031	4174	6.60303	3579	6.60303	3168	6.60303	3932	6.60332	3765
6.6097	2948	6.60963	3642	6.60972	3176	6.60958	2875	6.60962	3052	6.60973	4843			6.6097	3468	6.60977	2990	6.6097	3093	6.60977	3166	6.60962	2826	6.60978	2952			6.60955	2991	6.60957	3569	6.6095	3266	6.6095	3015	6.6095	3995	6.60978	4195
6.61618	2904	6.6161	2553	6.61618	3129	6.61605	2771	6.61608	3206	6.6162	6174			6.61617	3669	6.61623	3663	6.61617	3712	6.61625	3162	6.61608	2913	6.61625	3185			6.61602	3362	6.61603	3593	6.61598	3148	6.61597	3304	6.61597	3666	6.61625	3971
6.62265	3141	6.62257	3314	6.62265	3272	6.62252	2756	6.62257	2982	6.62267	6485			6.62263	3062	6.6227	3464	6.62263	3037	6.62272	2415	6.62257	3307	6.62272	3414			6.62248	2939	6.62252	3913	6.62245	3617	6.62245	3119	6.62245	3546	6.62272	3755
6.62912	3092	6.62903	3299	6.62912	3311	6.62898	2990	6.62903	2722	6.62913	3242			6.6291	3298	6.62917	3403	6.62912	3365	6.62918	2761	6.62903	3641	6.62918	3089			6.62895	2714	6.62898	3745	6.62892	3443	6.62892	3067	6.62892	3635	6.62918	4576
6.63558	3015	6.6355	3142	6.63558	3231	6.63547	2859	6.6355	2711	6.6356	3288			6.63558	3443	6.63563	3213	6.63558	3473	6.63565	2959	6.6355	3034	6.63565	3433			6.63542	3553	6.63545	3269	6.63538	3687	6.63538	2995	6.63538	3319	6.63565	4434
6.64205	3042	6.64198	3409	6.64205	3026	6.64193	2943	6.64197	2383	6.64207	2541			6.64205	3289	6.6421	3613	6.64205	3548	6.64212	3226	6.64197	3017	6.64212	3052			6.64188	3002	6.64192	3923	6.64185	3008	6.64185	3171	6.64185	3747	6.64213	4352
6.64852	2845	6.64845	3377	6.64853	3638	6.6484	2547	6.64843	2804	6.64853	2879			6.64852	3180	6.64857	3270	6.64852	3507	6.64858	3366	6.64843	3466	6.64858	3016			6.64835	3313	6.64838	3525	6.64832	3013	6.64832	3007	6.64832	3817	6.6486	4085
6.65498	2657	6.65492	3393	6.655	3004	6.65487	2857	6.6549	3069	6.65502	2903			6.65498	3233	6.65503	3726	6.65498	3436	6.65505	3405	6.6549	3231	6.65505	2582			6.65483	3507	6.65485	4128	6.65478	3271	6.65478	2954	6.65478	3743	6.65507	3898
6.66145	3080	6.66138	3031	6.66147	3567	6.66133	2751	6.66137	2645	6.66148	2722			6.66145	3039	6.66152	3442	6.66145	3222	6.66152	3387	6.66137	2869	6.66152	3044			6.6613	3002	6.66132	3295	6.66125	3033	6.66125	3300	6.66125	3896	6.66153	3459
6.66792	2759	6.66785	3630	6.66793	3880	6.6678	2714	6.66783	2793	6.66795	2810			6.66792	2757	6.66798	3376	6.66792	3150	6.668	2622	6.66783	3123	6.668	3058			6.66777	2981	6.66778	3579	6.66773	3304	6.66772	2729	6.66772	3935	6.668	3906
6.6744	2626	6.67432	3244	6.6744	4402	6.67427	2682	6.67432	2971	6.67442	3228			6.67438	3569	6.67445	3547	6.67438	3050	6.67447	3068	6.67432	3017	6.67447	3254			6.67423	3384	6.67427	3363	6.6742	3184	6.67418	2857	6.67418	3762	6.67447	4061
6.68087	2922	6.68078	3460	6.68087	3774	6.68073	3474	6.68078	2651	6.68088	3296			6.68085	3638	6.68092	3285	6.68085	3274	6.68093	2958	6.68078	3805	6.68093	3481			6.6807	2952	6.68073	3547	6.68067	3504	6.68067	2757	6.68067	3265	6.68093	3860
6.68733	2764	6.68725	3533	6.68733	3528	6.6872	3386	6.68725	2663	6.68735	3194			6.68733	3218	6.68738	3363	6.68733	3489	6.6874	2541	6.68725	3670	6.6874	3094			6.68717	3243	6.6872	3886	6.68713	3642	6.68713	3477	6.68713	3220	6.6874	3647
6.6938	2759	6.69373	3116	6.6938	3546	6.69368	3088	6.69372	3280	6.69382	3015			6.6938	3351	6.69385	3791	6.6938	3767	6.69387	3192	6.69372	3283	6.69387	3210			6.69363	3188	6.69367	3480	6.6936	3370	6.6936	3519	6.6936	3365	6.69387	3916
6.70027	3033	6.7002	2826	6.70027	3644	6.70015	2643	6.70018	2909	6.70028	2829			6.70027	3385	6.70032	4015	6.70027	2861	6.70033	3026	6.70018	3316	6.70033	2928			6.7001	2969	6.70013	3463	6.70007	3519	6.70007	3418	6.70007	3666	6.70035	3676
6.70673	2852	6.70667	3378	6.70675	2950	6.70662	2824	6.70665	2794	6.70675	2932			6.70673	3642	6.70678	3193	6.70673	3100	6.7068	3039	6.70665	3070	6.7068	2955			6.70658	3434	6.7066	3555	6.70653	3222	6.70653	3041	6.70653	3788	6.70682	4202
6.7132	3000	6.71313	3426	6.71322	3381	6.71308	2756	6.71312	3082	6.71323	2857			6.7132	3227	6.71325	3442	6.7132	3630	6.71327	3218	6.71312	3284	6.71327	3372			6.71305	2896	6.71307	3690	6.713	3324	6.713	2610	6.713	4122	6.71328	3534
6.71967	2977	6.7196	3163	6.71968	3076	6.71955	2683	6.71958	3179	6.7197	2649			6.71967	3244	6.71973	3455	6.71967	2781	6.71973	2976	6.71958	3003	6.71975	2953			6.71952	2676	6.71953	3101	6.71947	2927	6.71947	2782	6.71947	3635	6.71975	4005
6.72615	3120	6.72607	3226	6.72615	3061	6.72602	2819	6.72605	2624	6.72617	2327			6.72613	3859	6.7262	4000	6.72613	3678	6.72622	2793	6.72605	3638	6.72622	3656			6.72598	3030	6.726	3864	6.72595	3359	6.72593	3314	6.72593	3371	6.72622	3582
6.73262	2392	6.73253	3025	6.73262	3614	6.73248	2802	6.73253	3288	6.73263	2624			6.7326	3278	6.73267	3354	6.7326	3234	6.73268	3042	6.73253	2879	6.73268	3200			6.73245	3157	6.73248	3795	6.73242	3607	6.73242	3043	6.73242	3572	6.73268	3653
6.73908	3145	6.739	3368	6.73908	3400	6.73895	2711	6.739	2780	6.7391	3000			6.73907	3366	6.73913	2932	6.73908	3287	6.73915	2978	6.739	3332	6.73915	3245			6.73892	3287	6.73895	3636	6.73888	2986	6.73888	3058	6.73888	4080	6.73915	3938
6.74555	2774	6.74547	3420	6.74555	3214	6.74543	2838	6.74547	3092	6.74557	2930			6.74555	3385	6.7456	3874	6.74555	3107	6.74562	3022	6.74547	2687	6.74562	3404			6.74538	3097	6.74542	3207	6.74535	3161	6.74535	3029	6.74535	3565	6.74562	3201
6.75202	2819	6.75195	3332	6.75202	3295	6.7519	2882	6.75193	2842	6.75203	7283			6.75202	3632	6.75207	3287	6.75202	2954	6.75208	2902	6.75193	2913	6.75208	3597			6.75185	3342	6.75188	3564	6.75182	3269	6.75182	3061	6.75182	3703	6.7521	3785
6.75848	3093	6.75842	3306	6.7585	3086	6.75837	2405	6.7584	2904	6.7585	6384			6.75848	3348	6.75853	3348	6.75848	3084	6.75855	2863	6.7584	3207	6.75855	3046			6.75832	3271	6.75835	3298	6.75828	3242	6.75828	3085	6.75828	3563	6.75857	3092
6.76495	2359	6.76488	3064	6.76497	3251	6.76483	3300	6.76487	3102	6.76498	6971			6.76495	2976	6.765	3841	6.76495	3949	6.76502	3397	6.76487	3221	6.76502	2537			6.7648	3587	6.76482	3758	6.76475	3367	6.76475	2845	6.76475	4108	6.76503	3489
6.77142	2881	6.77135	3245	6.77143	3225	6.7713	2582	6.77133	3460	6.77145	6158			6.77142	2924	6.77148	3185	6.77142	3627	6.77148	3050	6.77133	3049	6.77148	3198			6.77127	3327	6.77128	3522	6.77122	3383	6.77122	3235	6.77122	3456	6.7715	3543
6.7779	2929	6.77782	3272	6.7779	3018	6.77777	2854	6.7778	2829	6.77792	7604			6.77788	3186	6.77795	3686	6.77788	3416	6.77797	3107	6.7778	3382	6.77797	3390			6.77773	3155	6.77775	3607	6.7777	3317	6.77768	2900	6.77768	4291	6.77797	3829
6.78437	3117	6.78428	3295	6.78437	3525	6.78423	2934	6.78428	3081	6.78438	7260			6.78435	2791	6.78442	3305	6.78435	2890	6.78443	3132	6.78428	3427	6.78443	2781			6.7842	3307	6.78423	3470	6.78417	2891	6.78415	2992	6.78415	3742	6.78443	5026
6.79083	2768	6.79075	3192	6.79083	3563	6.7907	3222	6.79075	3471	6.79085	4469			6.79082	3644	6.79088	3067	6.79082	3338	6.7909	2792	6.79075	3340	6.7909	3402			6.79067	2857	6.7907	3156	6.79063	3663	6.79063	2867	6.79063	3295	6.7909	4638
6.7973	3095	6.79722	2964	6.7973	3076	6.79717	2888	6.79722	2785	6.79732	6844			6.7973	3072	6.79735	2900	6.7973	3665	6.79737	2820	6.79722	3143	6.79737	3751			6.79713	3403	6.79717	3644	6.7971	3535	6.7971	3116	6.7971	3775	6.79737	4824
6.80377	3157	6.8037	3462	6.80377	4895	6.80365	2829	6.80368	2839	6.80378	8243			6.80377	3391	6.80382	3330	6.80377	3687	6.80383	2775	6.80368	2967	6.80383	3108			6.8036	2904	6.80363	3251	6.80357	3300	6.80357	3211	6.80357	3721	6.80383	5260
6.81023	3587	6.81017	5074	6.81023	8983	6.81012	4648	6.81015	4705	6.81025	7166			6.81023	3834	6.81028	4416	6.81023	3798	6.8103	2867	6.81015	3596	6.8103	3746			6.81007	2868	6.8101	3592	6.81003	3251	6.81003	3382	6.81003	3556	6.81032	5541
6.8167	4723	6.81663	9341	6.81672	20804	6.81658	10096	6.81662	9762	6.81672	15582			6.8167	3546	6.81675	5762	6.8167	6712	6.81677	3647	6.81662	5937	6.81677	4623			6.81655	3009	6.81657	3328	6.8165	3972	6.8165	3248	6.8165	3984	6.81678	4702
6.82317	9617	6.8231	19456	6.82318	49362	6.82305	25537	6.82308	22687	6.8232	28574			6.82317	5154	6.82322	9914	6.82317	12908	6.82323	5806	6.82308	12731	6.82323	6941			6.82302	3172	6.82303	3801	6.82297	4663	6.82297	4402	6.82297	5735	6.82325	6031
6.82963	18897	6.82957	40403	6.82965	102573	6.82952	54348	6.82955	46916	6.82967	58969			6.82963	7564	6.8297	17795	6.82963	25935	6.8297	10350	6.82955	26758	6.82972	13121			6.82948	3551	6.8295	5477	6.82943	6485	6.82943	6402	6.82943	7443	6.82972	5974
6.83612	33855	6.83603	76632	6.83612	179852	6.83598	108221	6.83602	87983	6.83613	105533			6.8361	12962	6.83617	30662	6.8361	47951	6.83618	15090	6.83602	49282	6.83618	21661			6.83595	4561	6.83597	7476	6.83592	10823	6.8359	9220	6.8359	11199	6.83618	8461
6.84258	53074	6.8425	116638	6.84258	275086	6.84245	176611	6.8425	148845	6.8426	160290			6.84257	20095	6.84263	50492	6.84257	76850	6.84265	23771	6.8425	81931	6.84265	33091			6.84242	5567	6.84245	10849	6.84238	14817	6.84238	16159	6.84238	18218	6.84265	11317
6.84905	72152	6.84897	153374	6.84905	352538	6.84892	249243	6.84897	196400	6.84907	213013			6.84903	25924	6.8491	67044	6.84905	101725	6.84912	34059	6.84897	115422	6.84912	44258			6.84888	6970	6.84892	12078	6.84885	19460	6.84885	21401	6.84885	22895	6.84912	14269
6.85552	80944	6.85543	171470	6.85552	386077	6.8554	293192	6.85543	230561	6.85553	239005			6.85552	33022	6.85557	73784	6.85552	122487	6.85558	42657	6.85543	138663	6.85558	50680			6.85535	7571	6.85538	15542	6.85532	23481	6.85532	25963	6.85532	28495	6.85558	16051
6.86198	79078	6.86192	164714	6.86198	362341	6.86187	291105	6.8619	229485	6.862	226754			6.86198	32101	6.86203	72734	6.86198	123169	6.86205	44670	6.8619	143004	6.86205	51236			6.86182	9157	6.86185	16035	6.86178	23269	6.86178	26200	6.86178	29111	6.86207	16700
6.86845	66417	6.86838	137821	6.86847	296979	6.86833	249844	6.86837	196275	6.86847	189209			6.86845	30180	6.8685	59617	6.86845	103551	6.86852	40465	6.86837	124167	6.86852	43149			6.86828	8581	6.86832	14816	6.86825	21749	6.86825	23867	6.86825	25479	6.86853	14599
6.87492	48562	6.87485	95714	6.87493	213576	6.8748	181421	6.87483	141710	6.87495	133447			6.87492	22684	6.87497	46463	6.87492	76434	6.87498	31949	6.87483	94712	6.87498	33142			6.87477	7552	6.87478	12367	6.87472	15963	6.87472	19766	6.87472	22681	6.875	11613
6.88138	31583	6.88132	60848	6.8814	129370	6.88127	116806	6.8813	93634	6.88142	85038			6.88138	16072	6.88145	29227	6.88138	51356	6.88145	22047	6.8813	59882	6.88145	21993			6.88123	6434	6.88125	8988	6.88118	11834	6.88118	14810	6.88118	15382	6.88147	8884
6.88787	18360	6.88778	34984	6.88787	73691	6.88773	67188	6.88777	52645	6.88788	49278			6.88785	10587	6.88792	17448	6.88785	30534	6.88793	13531	6.88777	35124	6.88793	14285			6.8877	5237	6.88772	7667	6.88767	6173	6.88765	8931	6.88765	11581	6.88793	6086
6.89433	9692	6.89425	18163	6.89433	36738	6.8942	37318	6.89425	28204	6.89435	24462			6.89432	6405	6.89438	9222	6.89432	16679	6.8944	8192	6.89425	19514	6.8944	8131			6.89417	4525	6.8942	5434	6.89413	5172	6.89412	5434	6.89412	6951	6.8944	4437
6.9008	5171	6.90072	10437	6.9008	18130	6.90067	18634	6.90072	14290	6.90082	17805			6.90078	4986	6.90085	6197	6.9008	9628	6.90087	5223	6.90072	10674	6.90087	4818			6.90063	5012	6.90067	4212	6.9006	3956	6.9006	4560	6.9006	5353	6.90087	3988
6.90727	3978	6.90718	6476	6.90727	10761	6.90713	10519	6.90718	6740	6.90728	11169			6.90727	3668	6.90732	5261	6.90727	6169	6.90733	4095	6.90718	5745	6.90733	4949			6.9071	3500	6.90713	3599	6.90707	3389	6.90707	3002	6.90707	4637	6.90733	3069
6.91373	3291	6.91367	4373	6.91373	5988	6.91362	6070	6.91365	5578	6.91375	7920			6.91373	3312	6.91378	3722	6.91373	4842	6.9138	3533	6.91365	4691	6.9138	3435			6.91357	3418	6.9136	3343	6.91353	3163	6.91353	2901	6.91353	4390	6.9138	3662
6.9202	3381	6.92013	4171	6.92022	5284	6.92008	5181	6.92012	3903	6.92022	8639			6.9202	2923	6.92025	3549	6.9202	4305	6.92027	3860	6.92012	4077	6.92027	2728			6.92003	3610	6.92007	3800	6.92	3392	6.92	3035	6.92	3993	6.92028	3323
6.92667	3158	6.9266	4036	6.92668	4293	6.92655	4203	6.92658	3504	6.92668	4670			6.92667	3011	6.92672	3663	6.92667	4211	6.92673	2968	6.92658	3463	6.92673	3503			6.92652	3089	6.92653	3103	6.92647	3530	6.92647	2766	6.92647	3871	6.92675	3627
6.93313	2776	6.93307	3436	6.93315	3806	6.93302	4059	6.93305	3433	6.93317	7208			6.93313	3193	6.9332	3046	6.93313	3039	6.9332	3192	6.93305	3245	6.9332	3034			6.93298	2995	6.933	3017	6.93293	3895	6.93293	2736	6.93293	3991	6.93322	3247
6.9396	2993	6.93953	3001	6.93962	3905	6.93948	3185	6.93952	3104	6.93963	7573			6.9396	3140	6.93967	3521	6.9396	3081	6.93968	3190	6.93952	3428	6.93968	3165			6.93945	3306	6.93947	3556	6.9394	3827	6.9394	3102	6.9394	3677	6.93968	3152
6.94608	2891	6.946	3412	6.94608	3792	6.94595	3248	6.946	3678	6.9461	7877			6.94607	2954	6.94613	3242	6.94607	2952	6.94615	2903	6.946	3333	6.94615	3311			6.94592	3514	6.94595	4271	6.94588	3508	6.94587	3264	6.94587	3411	6.94615	4460
6.95255	2961	6.95247	3220	6.95255	3942	6.95242	3097	6.95247	2986	6.95257	7114			6.95253	2783	6.9526	3735	6.95253	4102	6.95262	2932	6.95247	3806	6.95262	3080			6.95238	2825	6.95242	3901	6.95235	3336	6.95235	3126	6.95235	3805	6.95262	3441
6.95902	2985	6.95893	3130	6.95902	4261	6.95888	3104	6.95893	2888	6.95903	5372			6.959	3301	6.95907	3577	6.95902	3333	6.95908	3556	6.95893	3168	6.95908	3278			6.95885	3731	6.95888	3343	6.95882	3136	6.95882	2645	6.95882	4032	6.95908	3677
6.96548	2748	6.9654	3922	6.96548	4368	6.96537	2758	6.9654	3059	6.9655	6791			6.96548	2973	6.96553	3387	6.96548	3024	6.96555	3076	6.9654	3262	6.96555	3614			6.96532	3049	6.96535	3778	6.96528	3250	6.96528	3005	6.96528	3249	6.96555	2793
6.97195	3063	6.97188	3271	6.97195	3508	6.97183	3083	6.97187	3001	6.97197	5625			6.97195	3216	6.972	3773	6.97195	3664	6.97202	3303	6.97187	2800	6.97202	3687			6.97178	3276	6.97182	3526	6.97175	3438	6.97175	2753	6.97175	3158	6.97203	3235
6.97842	3014	6.97835	3073	6.97843	3675	6.9783	2909	6.97833	3479	6.97843	6859			6.97842	3383	6.97847	3527	6.97842	3404	6.97848	3150	6.97833	2782	6.97848	3025			6.97825	3163	6.97828	3361	6.97822	3283	6.97822	3042	6.97822	3838	6.9785	3348
6.98488	2991	6.98482	3028	6.9849	3691	6.98477	2878	6.9848	3170	6.98492	7048			6.98488	2801	6.98493	3546	6.98488	2739	6.98495	3302	6.9848	3528	6.98495	3200			6.98473	2962	6.98475	3269	6.98468	3360	6.98468	2576	6.98468	3879	6.98497	3442
6.99135	3120	6.99128	3380	6.99137	3349	6.99123	2978	6.99127	3265	6.99138	5142			6.99135	2986	6.99142	3290	6.99135	2582	6.99142	3547	6.99127	3341	6.99142	3002			6.9912	3460	6.99122	3371	6.99115	3744	6.99115	3075	6.99115	2914	6.99143	3495
6.99783	2966	6.99775	3641	6.99783	3296	6.9977	2823	6.99773	2927	6.99785	6665			6.99782	3021	6.99788	3386	6.99782	2975	6.9979	2578	6.99773	3452	6.9979	3268			6.99767	3307	6.99768	3351	6.99763	3303	6.99762	3382	6.99762	3608	6.9979	3304
7.0043	2909	7.00422	3461	7.0043	3043	7.00417	2980	7.00422	2731	7.00432	4979			7.00428	3233	7.00435	3348	7.00428	2923	7.00437	2990	7.00422	3181	7.00437	2821			7.00413	3082	7.00417	2919	7.0041	3227	7.0041	2897	7.0041	3231	7.00437	3532
7.01077	3445	7.01068	3248	7.01077	3832	7.01063	3082	7.01068	2604	7.01078	6260			7.01075	3135	7.01082	3422	7.01077	3055	7.01083	3254	7.01068	3055	7.01083	2931			7.0106	3116	7.01063	3362	7.01057	3244	7.01057	3337	7.01057	3583	7.01083	2880
7.01723	3121	7.01715	3531	7.01723	5790	7.0171	4073	7.01715	3399	7.01725	7517			7.01723	2882	7.01728	3169	7.01723	3692	7.0173	3377	7.01715	3573	7.0173	3168			7.01707	2547	7.0171	3661	7.01703	3241	7.01703	3281	7.01703	2993	7.0173	3269
7.0237	3595	7.02363	6627	7.0237	14214	7.02358	5674	7.02362	5010	7.02372	9862			7.0237	3343	7.02375	4552	7.0237	5011	7.02377	3547	7.02362	4722	7.02377	3699			7.02353	2694	7.02357	3973	7.0235	3382	7.0235	2908	7.0235	2758	7.02377	3881
7.03017	5941	7.0301	14204	7.03018	41495	7.03005	15233	7.03008	15166	7.03018	19652			7.03017	3652	7.03022	8527	7.03017	9740	7.03023	3771	7.03008	9572	7.03023	6539			7.03	3838	7.03003	4150	7.02997	4352	7.02997	3345	7.02997	4612	7.03025	4788
7.03663	13613	7.03657	37458	7.03665	115956	7.03652	44439	7.03655	39359	7.03667	43684			7.03663	6031	7.03668	20492	7.03663	25738	7.0367	8137	7.03655	24140	7.0367	15637			7.03648	3437	7.0365	5901	7.03643	8918	7.03643	6170	7.03643	7773	7.03672	7079
7.0431	32312	7.04303	93637	7.04312	276454	7.04298	113820	7.04302	100156	7.04313	106942			7.0431	12393	7.04317	48424	7.0431	62920	7.04317	19652	7.04302	60365	7.04317	35714			7.04295	5180	7.04297	12104	7.0429	20417	7.0429	10556	7.0429	16137	7.04318	12212
7.04957	66196	7.0495	193797	7.04958	575378	7.04945	244331	7.04948	215955	7.0496	224704			7.04957	24160	7.04963	97132	7.04957	140421	7.04965	38502	7.04948	132456	7.04965	74924			7.04942	9583	7.04943	22148	7.04937	42039	7.04937	21639	7.04937	29912	7.04965	23003
7.05605	127051	7.05597	350678	7.05605	972743	7.05592	460731	7.05597	404271	7.05607	392513			7.05603	45362	7.0561	175998	7.05603	251211	7.05612	73631	7.05597	249851	7.05612	136787			7.05588	15533	7.05592	37957	7.05585	80020	7.05583	40433	7.05583	53426	7.05612	42461
7.06252	192122	7.06243	531252	7.06252	1413657	7.06238	730142	7.06243	634866	7.06253	594724			7.0625	72612	7.06257	266565	7.0625	394636	7.06258	119714	7.06243	394569	7.06258	218939			7.06235	23984	7.06238	56257	7.06232	129883	7.06232	64931	7.06232	83083	7.06258	63917
7.06898	257819	7.0689	681881	7.06898	1740454	7.06885	968755	7.0689	844013	7.069	768766			7.06898	103419	7.06903	351112	7.06898	510600	7.06905	162984	7.0689	530555	7.06905	285394			7.06882	31811	7.06885	76113	7.06878	180320	7.06878	93457	7.06878	111978	7.06905	85723
7.07545	291892	7.07537	730924	7.07545	1835214	7.07533	1092767	7.07537	938669	7.07547	852223			7.07545	118144	7.0755	386469	7.07545	578578	7.07552	188710	7.07537	616660	7.07552	328084			7.07528	39678	7.07532	86775	7.07525	220327	7.07525	113976	7.07525	130567	7.07552	103743
7.08192	283911	7.08185	681249	7.08192	1648697	7.0818	1049079	7.08183	904013	7.08193	811755			7.08192	118653	7.08197	366422	7.08192	553441	7.08198	193880	7.08183	602573	7.08198	323537			7.08175	42768	7.08178	86604	7.08172	224013	7.08172	116512	7.08172	131509	7.082	102979
7.08838	232980	7.08832	556336	7.0884	1309377	7.08827	877100	7.0883	754066	7.0884	662176			7.08838	103777	7.08843	303303	7.08838	466794	7.08845	171588	7.0883	506986	7.08845	267536			7.08822	39259	7.08825	74709	7.08818	195634	7.08818	104008	7.08818	115089	7.08847	91225
7.09485	169864	7.09478	385141	7.09487	896551	7.09473	629470	7.09477	544859	7.09488	474419			7.09485	78727	7.0949	213193	7.09485	338036	7.09492	127934	7.09477	367704	7.09492	198810			7.0947	30732	7.09472	55271	7.09465	149774	7.09465	80481	7.09465	84695	7.09493	70479
7.10132	111363	7.10125	242602	7.10133	544973	7.1012	412428	7.10123	346559	7.10135	298944			7.10132	54806	7.10138	137129	7.10132	219740	7.10138	84281	7.10123	235892	7.1014	129307			7.10117	23005	7.10118	38046	7.10112	106200	7.10112	55244	7.10112	58251	7.1014	47440
7.1078	63131	7.10772	131224	7.1078	293570	7.10767	231979	7.1077	201368	7.10782	169363			7.10778	33128	7.10785	76498	7.10778	127282	7.10787	51684	7.1077	134042	7.10787	73112			7.10763	14821	7.10765	22116	7.1076	60068	7.10758	34961	7.10758	34887	7.10787	27615
7.11427	34417	7.11418	67444	7.11427	146603	7.11413	115170	7.11418	96495	7.11428	84822			7.11425	18064	7.11432	39323	7.11425	64713	7.11433	28900	7.11418	69209	7.11433	38474			7.1141	8969	7.11413	12637	7.11407	34043	7.11407	18800	7.11407	20281	7.11433	15736
7.12073	16564	7.12065	30017	7.12073	63583	7.1206	57613	7.12065	43618	7.12075	38505			7.12072	9947	7.12078	19823	7.12073	32169	7.1208	14838	7.12065	33722	7.1208	20184			7.12057	5487	7.1206	7905	7.12053	17012	7.12053	9340	7.12053	10976	7.1208	8651
7.1272	8137	7.12712	15135	7.1272	28972	7.12708	24918	7.12712	21247	7.12722	16750			7.1272	5912	7.12725	9519	7.1272	15952	7.12727	7988	7.12712	17072	7.12727	9681			7.12703	3757	7.12707	4808	7.127	10559	7.127	5441	7.127	6438	7.12727	5556
7.13367	4920	7.1336	8040	7.13367	14632	7.13355	13841	7.13358	10794	7.13368	8173			7.13367	3608	7.13372	5786	7.13367	7836	7.13373	4448	7.13358	7922	7.13373	6065			7.1335	3355	7.13353	3882	7.13347	5869	7.13347	3706	7.13347	4323	7.13373	3964
7.14013	3837	7.14007	4854	7.14015	8398	7.14002	8073	7.14005	5654	7.14015	5389			7.14013	2967	7.14018	4117	7.14013	4873	7.1402	3839	7.14005	5061	7.1402	4322			7.13997	2735	7.14	3836	7.13993	4316	7.13993	3401	7.13993	3472	7.14022	3498
7.1466	3907	7.14653	4491	7.14662	6024	7.14648	5680	7.14652	4730	7.14663	4216			7.1466	3427	7.14665	3950	7.1466	4827	7.14667	3811	7.14652	3654	7.14667	3191			7.14645	2775	7.14647	3558	7.1464	3855	7.1464	3421	7.1464	3613	7.14668	3340
7.15307	2812	7.153	3829	7.15308	5545	7.15295	4943	7.15298	4129	7.1531	4411			7.15307	3230	7.15313	3598	7.15307	3946	7.15313	3233	7.15298	3448	7.15313	3229			7.15292	2839	7.15293	3723	7.15287	3275	7.15287	2831	7.15287	3104	7.15315	2922
7.15953	3214	7.15947	4336	7.15955	4760	7.15942	4186	7.15945	3743	7.15957	3796			7.15953	4154	7.1596	2873	7.15953	3634	7.15962	3032	7.15945	3916	7.15962	3404			7.15938	2835	7.1594	3482	7.15935	3141	7.15933	3074	7.15933	2992	7.15962	3222
7.16602	2590	7.16593	4462	7.16602	5036	7.16588	3740	7.16593	2708	7.16603	3153			7.166	3443	7.16607	3120	7.166	3725	7.16608	2320	7.16593	3797	7.16608	3196			7.16585	2651	7.16588	3845	7.16582	3740	7.1658	2517	7.1658	3140	7.16608	3362
7.17248	2865	7.1724	3237	7.17248	4289	7.17235	4191	7.1724	3603	7.1725	2933			7.17247	3197	7.17253	3245	7.17247	3319	7.17255	2702	7.1724	3611	7.17255	2909			7.17232	3308	7.17235	2933	7.17228	3398	7.17228	3075	7.17228	2688	7.17255	3488
7.17895	2705	7.17887	3373	7.17895	4343	7.17882	3742	7.17887	3695	7.17897	2966			7.17895	3369	7.179	3700	7.17895	3065	7.17902	3275	7.17887	3481	7.17902	2998			7.17878	3459	7.17882	3118	7.17875	3461	7.17875	2952	7.17875	3081	7.17902	2997
7.18542	2949	7.18533	3369	7.18542	4069	7.1853	3146	7.18533	3486	7.18543	3068			7.18542	3401	7.18547	3331	7.18542	3262	7.18548	3103	7.18533	3601	7.18548	3089			7.18525	3225	7.18528	3263	7.18522	3269	7.18522	2669	7.18522	3315	7.18548	3269
7.19188	3324	7.19182	3137	7.19188	4382	7.19177	3239	7.1918	3417	7.1919	3625			7.19188	3533	7.19193	3230	7.19188	3411	7.19195	3175	7.1918	3398	7.19195	2873			7.19172	3112	7.19175	3750	7.19168	2961	7.19168	2880	7.19168	3216	7.19197	3165
7.19835	2979	7.19828	3010	7.19837	4612	7.19823	3386	7.19827	2877	7.19837	2894			7.19835	3218	7.1984	3273	7.19835	3649	7.19842	3282	7.19827	3228	7.19842	3193			7.19818	2929	7.19822	3390	7.19815	3418	7.19815	2464	7.19815	3292	7.19843	3433
7.20482	2746	7.20475	3056	7.20483	3992	7.2047	2941	7.20473	3053	7.20485	3174			7.20482	3139	7.20487	4365	7.20482	3157	7.20488	2822	7.20473	3262	7.20488	3739			7.20467	2931	7.20468	2646	7.20462	3656	7.20462	3056	7.20462	2998	7.2049	2903
7.21128	2822	7.21122	3282	7.2113	3606	7.21117	3168	7.2112	2579	7.21132	2805			7.21128	3096	7.21135	6147	7.21128	5038	7.21135	3651	7.2112	3965	7.21137	2952			7.21113	3074	7.21115	3487	7.21108	3225	7.21108	2473	7.21108	3372	7.21137	3825
7.21777	2983	7.21768	3796	7.21777	3718	7.21763	3238	7.21767	2907	7.21778	2413			7.21775	4732	7.21782	7551	7.21775	5798	7.21783	4878	7.21767	4232	7.21783	3561			7.2176	3081	7.21762	3448	7.21757	3249	7.21755	2938	7.21755	3442	7.21783	3703
7.22423	2674	7.22415	3398	7.22423	4430	7.2241	2950	7.22415	2661	7.22425	7489			7.22422	5261	7.22428	8779	7.22422	6377	7.2243	6168	7.22415	5094	7.2243	5246			7.22407	2772	7.2241	3403	7.22403	3838	7.22403	3457	7.22403	3131	7.2243	3089
7.2307	3089	7.23062	3838	7.2307	3335	7.23057	2738	7.23062	2860	7.23072	7925			7.23068	5950	7.23075	11529	7.2307	7650	7.23077	6501	7.23062	5031	7.23077	5026			7.23053	3298	7.23057	3768	7.2305	3948	7.2305	3672	7.2305	3311	7.23077	4099
7.23717	2565	7.23708	3555	7.23717	3709	7.23705	2190	7.23708	2813	7.23718	7112			7.23717	6958	7.23722	10686	7.23717	8143	7.23723	6263	7.23708	5720	7.23723	5519			7.237	2793	7.23703	4080	7.23697	4100	7.23697	3159	7.23697	3296	7.23723	4113
7.24363	2976	7.24357	3333	7.24363	3337	7.24352	3188	7.24355	2940	7.24365	4377			7.24363	6472	7.24368	10471	7.24363	7032	7.2437	7460	7.24355	6202	7.2437	4841			7.24347	3490	7.2435	4268	7.24343	4250	7.24343	4114	7.24343	3445	7.24372	4190
7.2501	2908	7.25003	3479	7.25012	3666	7.24998	3835	7.25002	3339	7.25012	6742			7.2501	6719	7.25015	8151	7.2501	6908	7.25017	5930	7.25002	5088	7.25017	5437			7.24993	2985	7.24997	3429	7.2499	3586	7.2499	3510	7.2499	2890	7.25018	4239
7.25657	3260	7.2565	3392	7.25658	3443	7.25645	3013	7.25648	2998	7.2566	7446			7.25657	4585	7.25662	6997	7.25657	4981	7.25663	5514	7.25648	4924	7.25663	5267			7.25642	3633	7.25643	3674	7.25637	2965	7.25637	3519	7.25637	3988	7.25665	4046
7.26303	2874	7.26297	3210	7.26305	3279	7.26292	3174	7.26295	3018	7.26307	7747			7.26303	4283	7.2631	4856	7.26303	4456	7.2631	3844	7.26295	4526	7.2631	4742			7.26288	3300	7.2629	3540	7.26283	3386	7.26283	3072	7.26283	3295	7.26312	3091
7.2695	3405	7.26943	2918	7.26952	3679	7.26938	2851	7.26942	2908	7.26953	7483			7.2695	4042	7.26957	4360	7.2695	3942	7.26958	3781	7.26942	3471	7.26958	3922			7.26935	2858	7.26937	3609	7.26932	3189	7.2693	3096	7.2693	3299	7.26958	3320
7.27598	2886	7.2759	3287	7.27598	3558	7.27585	2739	7.2759	2559	7.276	4311			7.27597	3339	7.27603	2918	7.27597	3106	7.27605	2906	7.2759	4002	7.27605	3981			7.27582	3168	7.27585	2965	7.27578	3631	7.27577	2846	7.27577	3451	7.27605	3568
7.28245	3194	7.28237	3375	7.28245	3275	7.28232	2405	7.28237	3037	7.28247	7253			7.28243	3471	7.2825	3306	7.28243	2746	7.28252	2976	7.28237	3239	7.28252	3706			7.28228	2871	7.28232	3536	7.28225	3356	7.28225	2799	7.28225	3937	7.28252	3768
7.28892	2922	7.28883	3247	7.28892	3492	7.28878	2623	7.28883	3181	7.28893	7885			7.28892	3716	7.28897	3158	7.28892	3204	7.28898	2944	7.28883	2757	7.28898	3240			7.28875	3312	7.28878	3150	7.28872	3415	7.28872	2563	7.28872	3098	7.28898	3672
7.29538	2917	7.29532	3527	7.29538	2979	7.29527	2808	7.2953	3307	7.2954	5284			7.29538	3829	7.29543	3613	7.29538	3403	7.29545	3371	7.2953	3075	7.29545	3181			7.29522	2913	7.29525	4258	7.29518	3547	7.29518	3009	7.29518	3418	7.29545	3900
7.30185	3047	7.30178	3323	7.30185	2984	7.30173	3081	7.30177	3070	7.30187	6875			7.30185	3316	7.3019	3633	7.30185	3423	7.30192	2800	7.30177	3323	7.30192	3215			7.30168	3162	7.30172	3534	7.30165	3341	7.30165	3114	7.30165	3932	7.30193	3261
7.30832	2717	7.30825	3051	7.30833	3584	7.3082	3271	7.30823	3012	7.30833	6212			7.30832	3597	7.30837	3084	7.30832	3118	7.30838	2762	7.30823	3261	7.30838	3226			7.30817	3051	7.30818	3814	7.30812	3337	7.30812	3114	7.30812	4178	7.3084	3620
7.31478	2813	7.31472	3060	7.3148	3134	7.31467	2624	7.3147	2526	7.31482	6351			7.31478	3812	7.31483	3346	7.31478	3154	7.31485	2870	7.3147	3442	7.31485	3052			7.31463	3111	7.31465	3391	7.31458	3268	7.31458	3386	7.31458	4496	7.31487	3773
7.32125	2812	7.32118	3077	7.32127	3407	7.32113	2484	7.32117	3046	7.32128	7309			7.32125	2521	7.32132	3843	7.32125	3365	7.32132	3267	7.32117	3461	7.32133	2886			7.3211	3228	7.32112	3384	7.32105	3066	7.32105	3388	7.32105	4431	7.32133	3559
7.32773	3345	7.32765	3429	7.32773	3042	7.3276	2943	7.32763	2944	7.32775	4934			7.32772	2646	7.32778	3108	7.32772	3044	7.3278	3228	7.32763	3258	7.3278	2837			7.32757	3567	7.32758	3457	7.32753	3090	7.32752	3063	7.32752	4553	7.3278	3737
7.3342	3084	7.33412	3005	7.3342	2907	7.33407	2562	7.33412	2688	7.33422	6484			7.33418	3054	7.33425	4064	7.33418	3345	7.33427	2738	7.33412	3417	7.33427	3227			7.33403	3156	7.33407	3085	7.334	3390	7.334	3271	7.334	4018	7.33427	3526
7.34067	2822	7.34058	3541	7.34067	3159	7.34053	2818	7.34058	2780	7.34068	7249			7.34065	3026	7.34072	3008	7.34067	3388	7.34073	3132	7.34058	2657	7.34073	2389			7.3405	3302	7.34053	2975	7.34047	3538	7.34047	2829	7.34047	3638	7.34073	2795
7.34713	3005	7.34705	3522	7.34713	3210	7.34702	2328	7.34705	3102	7.34715	5983			7.34713	3425	7.34718	3210	7.34713	3308	7.3472	2970	7.34705	3100	7.3472	3382			7.34697	3024	7.347	3703	7.34693	3154	7.34693	3137	7.34693	4371	7.3472	3214
7.3536	2664	7.35353	2803	7.3536	3664	7.35348	2802	7.35352	3071	7.35362	7762			7.3536	2995	7.35365	3488	7.3536	3046	7.35367	2970	7.35352	2649	7.35367	3551			7.35343	3105	7.35347	3333	7.3534	3082	7.3534	3340	7.3534	3517	7.35368	3517
7.36007	3072	7.36	2961	7.36008	3159	7.35995	2957	7.35998	3330	7.36008	4439			7.36007	3860	7.36012	3565	7.36007	3584	7.36013	3096	7.35998	3481	7.36013	3288			7.3599	3189	7.35993	3316	7.35987	2913	7.35987	2804	7.35987	3565	7.36015	3580
7.36653	2700	7.36647	3453	7.36655	3489	7.36642	2821	7.36645	2738	7.36657	6315			7.36653	2870	7.36658	3472	7.36653	3614	7.3666	3331	7.36645	3218	7.3666	2986			7.36638	2719	7.3664	3577	7.36633	3357	7.36633	3314	7.36633	3978	7.36662	3148
7.373	2622	7.37293	3448	7.37302	3224	7.37288	2669	7.37292	2974	7.37303	6827			7.373	3418	7.37307	3361	7.373	3463	7.37307	3324	7.37292	3706	7.37307	3201			7.37285	3133	7.37287	3859	7.3728	3509	7.3728	3027	7.3728	3779	7.37308	3265
7.37948	2977	7.3794	2906	7.37948	3307	7.37935	2869	7.37938	3009	7.3795	6597			7.37947	3270	7.37953	3341	7.37947	2751	7.37955	3189	7.37938	2792	7.37955	2952			7.37932	2687	7.37933	3530	7.37928	3114	7.37927	3323	7.37927	3836	7.37955	3514
7.38595	2618	7.38587	2964	7.38595	3530	7.38582	3109	7.38587	3132	7.38597	7048			7.38593	3024	7.386	3385	7.38593	3202	7.38602	2935	7.38587	3351	7.38602	2941			7.38578	3123	7.38582	3422	7.38575	2943	7.38573	3199	7.38573	4109	7.38602	3897
7.39242	2461	7.39233	2949	7.39242	3445	7.39228	2768	7.39233	2423	7.39243	4364			7.3924	2937	7.39247	3195	7.3924	3175	7.39248	2906	7.39233	3272	7.39248	2840			7.39225	3235	7.39228	3393	7.39222	3185	7.39222	2889	7.39222	3393	7.39248	2995
7.39888	3129	7.3988	3351	7.39888	2866	7.39875	2581	7.3988	2407	7.3989	6605			7.39888	3239	7.39893	3678	7.39888	3293	7.39895	2864	7.3988	3122	7.39895	3092			7.39872	2633	7.39875	3101	7.39868	3232	7.39868	3111	7.39868	3072	7.39895	3225
7.40535	3249	7.40528	2863	7.40535	3295	7.40523	2645	7.40527	2817	7.40537	7321			7.40535	2756	7.4054	3435	7.40535	3417	7.40542	2886	7.40527	2759	7.40542	3154			7.40518	2846	7.40522	2982	7.40515	3583	7.40515	3024	7.40515	3436	7.40542	3422
7.41182	2659	7.41175	2884	7.41182	3096	7.4117	2961	7.41173	3287	7.41183	6268			7.41182	3285	7.41187	3331	7.41182	2914	7.41188	3000	7.41173	3043	7.41188	3033			7.41165	2851	7.41168	3635	7.41162	3590	7.41162	3175	7.41162	4218	7.4119	3444
7.41828	3004	7.41822	3204	7.4183	3275	7.41817	2840	7.4182	2891	7.4183	7115			7.41828	3348	7.41833	3247	7.41828	3498	7.41835	2965	7.4182	3459	7.41835	3237			7.41813	2940	7.41815	3050	7.41808	3388	7.41808	2595	7.41808	3586	7.41837	2610
7.42475	3069	7.42468	3045	7.42477	3426	7.42463	2445	7.42467	2931	7.42478	4223			7.42475	3392	7.4248	3575	7.42475	3276	7.42482	3408	7.42467	3092	7.42482	2849			7.4246	3133	7.42462	3079	7.42455	3160	7.42455	3066	7.42455	2884	7.42483	3156
7.43122	3011	7.43115	3530	7.43123	3214	7.4311	2730	7.43113	2792	7.43125	7353			7.43122	3141	7.43128	3394	7.43122	2911	7.43128	3061	7.43113	3670	7.4313	2838			7.43107	2972	7.43108	3554	7.43102	2771	7.43102	3041	7.43102	3494	7.4313	3336
7.4377	2362	7.43762	3056	7.4377	3083	7.43757	2702	7.4376	3222	7.43772	6772			7.43768	3076	7.43775	3286	7.43768	3365	7.43777	3234	7.4376	3150	7.43777	2976			7.43753	3378	7.43755	3210	7.4375	3421	7.43748	2949	7.43748	3450	7.43777	3225
7.44417	2606	7.44408	2977	7.44417	3124	7.44403	3175	7.44408	3193	7.44418	5569			7.44415	3230	7.44422	3683	7.44415	3232	7.44423	2963	7.44408	3541	7.44423	3028			7.444	3223	7.44403	3973	7.44397	3504	7.44397	2637	7.44397	3396	7.44423	3549
7.45063	3200	7.45055	3533	7.45063	2886	7.4505	2878	7.45055	2738	7.45065	7088			7.45062	3369	7.45068	4142	7.45063	3361	7.4507	3468	7.45055	3028	7.4507	2626			7.45047	3263	7.4505	4772	7.45043	3361	7.45043	3333	7.45043	4897	7.4507	3862
7.4571	2834	7.45702	3361	7.4571	3097	7.45698	2644	7.45702	3055	7.45712	5587			7.4571	3363	7.45715	5219	7.4571	4103	7.45717	3095	7.45702	2936	7.45717	3376			7.45693	3731	7.45697	5006	7.4569	3595	7.4569	2956	7.4569	4885	7.45717	3914
7.46357	3209	7.4635	3097	7.46357	3149	7.46345	2967	7.46348	3015	7.46358	7064			7.46357	3873	7.46362	5872	7.46357	4364	7.46363	3075	7.46348	4237	7.46363	3681			7.4634	4526	7.46343	5967	7.46337	3731	7.46337	3946	7.46337	6254	7.46365	4814
7.47003	2933	7.46997	3371	7.47005	3986	7.46992	2891	7.46995	3202	7.47005	7552			7.47003	4608	7.47008	6851	7.47003	5480	7.4701	3017	7.46995	3943	7.4701	3299			7.46987	5606	7.4699	7659	7.46983	3354	7.46983	3718	7.46983	6520	7.47012	5656
7.4765	3174	7.47643	3539	7.47652	3348	7.47638	2569	7.47642	2800	7.47653	5470			7.4765	5609	7.47655	7242	7.4765	6000	7.47657	2931	7.47642	4195	7.47657	3911			7.47635	5651	7.47637	7228	7.4763	3178	7.4763	5199	7.4763	6751	7.47658	6152
7.48297	3321	7.4829	3392	7.48298	3315	7.48285	2061	7.48288	2792	7.483	7593			7.48297	5641	7.48303	7438	7.48297	6265	7.48303	3209	7.48288	4690	7.48303	4245			7.48282	5551	7.48283	6253	7.48277	3494	7.48277	5889	7.48277	6924	7.48305	6194
7.48945	2620	7.48937	3125	7.48945	3845	7.48932	2668	7.48935	2978	7.48947	5021			7.48943	4916	7.4895	5804	7.48943	6016	7.48952	3395	7.48935	5262	7.48952	3798			7.48928	5874	7.4893	6777	7.48925	3182	7.48923	4739	7.48923	5899	7.48952	5956
7.49592	2910	7.49583	3090	7.49592	4123	7.49578	2854	7.49583	2773	7.49593	7160			7.4959	4219	7.49597	5761	7.4959	5056	7.49598	3858	7.49583	4607	7.49598	3710			7.49575	5490	7.49578	5687	7.49572	3243	7.4957	5756	7.4957	5668	7.49598	5207
7.50238	2898	7.5023	3399	7.50238	5057	7.50225	3487	7.5023	3420	7.5024	7459			7.50237	4791	7.50243	5209	7.50237	4291	7.50245	3194	7.5023	3808	7.50245	4012			7.50222	5387	7.50225	5436	7.50218	3429	7.50218	4722	7.50218	4829	7.50245	5053
7.50885	2994	7.50877	4045	7.50885	7439	7.50872	4201	7.50877	4684	7.50887	7128			7.50885	3912	7.5089	5450	7.50885	4805	7.50892	3270	7.50877	4633	7.50892	4796			7.50868	4948	7.50872	5372	7.50865	4162	7.50865	5098	7.50865	5189	7.50892	4467
7.51532	3351	7.51525	4669	7.51532	7799	7.5152	5091	7.51523	5246	7.51533	9152			7.51532	4199	7.51537	4319	7.51532	5526	7.51538	2728	7.51523	3645	7.51538	3128			7.51515	4575	7.51518	5207	7.51512	4068	7.51512	4920	7.51512	5418	7.51538	4532
7.52178	3250	7.52172	5618	7.52178	10158	7.52167	6167	7.5217	5605	7.5218	6594			7.52178	3740	7.52183	3373	7.52178	4843	7.52185	2723	7.5217	4684	7.52185	4594			7.52162	4413	7.52165	4509	7.52158	3241	7.52158	3649	7.52158	5208	7.52187	4177
7.52825	3703	7.52818	5499	7.52827	11162	7.52813	6905	7.52817	5601	7.52827	9316			7.52825	4236	7.5283	5331	7.52825	5645	7.52832	3431	7.52817	6317	7.52832	4646			7.5281	4009	7.52812	3860	7.52805	4118	7.52805	4056	7.52805	4734	7.52833	4099
7.53472	3218	7.53465	5361	7.53473	10136	7.5346	6678	7.53463	6197	7.53475	10374			7.53472	4165	7.53477	4393	7.53472	6313	7.53478	3326	7.53463	5541	7.53478	4209			7.53457	4005	7.53458	3853	7.53452	4199	7.53452	4258	7.53452	4409	7.5348	3813
7.54118	3278	7.54112	5969	7.5412	10156	7.54107	6456	7.5411	6199	7.54122	8044			7.54118	3334	7.54125	4711	7.54118	5926	7.54125	3283	7.5411	5587	7.54127	3625			7.54103	3844	7.54105	4663	7.54098	4171	7.54098	3498	7.54098	4092	7.54127	3660
7.54767	3062	7.54758	5041	7.54767	9686	7.54753	5516	7.54757	5872	7.54768	9629			7.54765	3732	7.54772	4236	7.54765	5106	7.54773	2918	7.54757	5610	7.54773	3883			7.5475	3332	7.54753	4140	7.54747	4092	7.54745	3985	7.54745	4279	7.54773	3434
7.55413	3387	7.55405	6151	7.55413	10792	7.554	6078	7.55405	6405	7.55415	6849			7.55412	3569	7.55418	4146	7.55412	5139	7.5542	3022	7.55405	5433	7.5542	4144			7.55397	3383	7.554	4221	7.55393	3907	7.55393	3230	7.55393	3896	7.5542	4677
7.5606	3813	7.56052	7247	7.5606	15632	7.56047	7867	7.56052	7654	7.56062	10468			7.56058	3620	7.56065	5766	7.5606	6062	7.56067	4105	7.56052	6195	7.56067	4301			7.56043	3665	7.56047	3683	7.5604	4154	7.5604	3486	7.5604	3813	7.56067	3287
7.56707	3789	7.56698	9510	7.56707	19766	7.56695	10260	7.56698	9323	7.56708	12575			7.56707	4048	7.56712	5440	7.56707	8047	7.56713	4110	7.56698	9537	7.56713	6448			7.5669	3597	7.56693	4090	7.56687	4405	7.56687	3753	7.56687	3827	7.56713	3836
7.57353	4252	7.57347	10867	7.57353	25104	7.57342	14000	7.57345	11791	7.57355	14426			7.57353	4785	7.57358	7642	7.57353	10425	7.5736	4464	7.57345	9675	7.5736	7352			7.57337	3966	7.5734	4594	7.57333	6362	7.57333	4227	7.57333	5079	7.57362	4118
7.58	6055	7.57993	12541	7.58002	29189	7.57988	16413	7.57992	15235	7.58002	16783			7.58	4467	7.58005	9885	7.58	12977	7.58007	4500	7.57992	13386	7.58007	8286			7.57983	3512	7.57987	4601	7.5798	7308	7.5798	4765	7.5798	5093	7.58008	4974
7.58647	5966	7.5864	14418	7.58648	31281	7.58635	19210	7.58638	16344	7.5865	14649			7.58647	5222	7.58652	10407	7.58647	14078	7.58653	5453	7.58638	14164	7.58653	9248			7.58632	4251	7.58633	5370	7.58627	7291	7.58627	4594	7.58627	5552	7.58655	5283
7.59293	6122	7.59287	12966	7.59295	27818	7.59282	18980	7.59285	16085	7.59297	13530			7.59293	5166	7.593	9425	7.59293	13523	7.593	4904	7.59285	15033	7.593	8315			7.59278	3132	7.5928	4346	7.59273	6666	7.59273	4721	7.59273	5758	7.59302	4219
7.59942	5237	7.59933	10852	7.59942	23324	7.59928	15079	7.59932	13107	7.59943	12248			7.5994	4424	7.59947	7711	7.5994	11979	7.59948	5580	7.59932	12133	7.59948	7749			7.59925	3358	7.59927	4474	7.59922	5992	7.5992	3949	7.5992	4442	7.59948	4271
7.60588	3807	7.6058	8576	7.60588	17061	7.60575	11566	7.6058	10152	7.6059	10542			7.60587	3341	7.60593	6977	7.60587	10122	7.60595	4262	7.6058	8636	7.60595	6794			7.60572	3153	7.60575	3683	7.60568	6007	7.60568	3549	7.60568	4690	7.60595	4227
7.61235	3523	7.61227	6223	7.61235	11465	7.61222	8385	7.61227	6487	7.61237	6353			7.61233	3446	7.6124	4947	7.61235	6701	7.61242	4205	7.61227	6985	7.61242	4244			7.61218	3289	7.61222	3727	7.61215	4531	7.61215	3706	7.61215	3154	7.61242	3422
7.61882	3083	7.61873	5027	7.61882	8134	7.61868	6241	7.61873	5081	7.61883	4670			7.61882	3061	7.61887	4618	7.61882	4902	7.61888	3245	7.61873	5244	7.61888	3940			7.61865	2947	7.61868	3556	7.61862	3867	7.61862	2927	7.61862	3228	7.61888	3257
7.62528	3279	7.62522	3694	7.62528	5186	7.62517	4504	7.6252	4352	7.6253	3236			7.62528	3508	7.62533	3991	7.62528	3882	7.62535	2984	7.6252	3331	7.62535	3550			7.62512	3147	7.62515	3707	7.62508	3733	7.62508	2464	7.62508	3100	7.62535	3263
7.63175	2529	7.63168	3562	7.63177	3565	7.63163	3104	7.63167	2741	7.63177	3672			7.63175	3352	7.6318	3286	7.63175	3479	7.63182	3731	7.63167	3224	7.63182	3704			7.63158	3504	7.63162	2937	7.63155	3563	7.63155	3016	7.63155	3608	7.63183	2819
7.63822	2680	7.63815	2796	7.63823	3265	7.6381	2533	7.63813	2524	7.63823	3290			7.63822	3507	7.63827	3658	7.63822	2852	7.63828	2574	7.63813	2950	7.63828	3517			7.63807	2589	7.63808	3462	7.63802	3249	7.63802	3117	7.63802	3119	7.6383	3353
7.64468	3467	7.64462	3269	7.6447	3425	7.64457	2865	7.6446	3266	7.64472	2975			7.64468	3472	7.64475	3449	7.64468	3609	7.64475	2927	7.6446	3417	7.64475	3008			7.64453	3193	7.64455	3129	7.64448	3562	7.64448	2942	7.64448	3457	7.64477	3489
7.65115	2825	7.65108	3031	7.65117	3160	7.65103	2759	7.65107	3029	7.65118	2636			7.65115	3323	7.65122	3760	7.65115	3423	7.65123	3199	7.65107	3697	7.65123	3396			7.651	3086	7.65102	3803	7.65095	3576	7.65095	3341	7.65095	3216	7.65123	3044
7.65763	3181	7.65755	3219	7.65763	3444	7.6575	2604	7.65755	3168	7.65765	2671			7.65762	3043	7.65768	3094	7.65762	3843	7.6577	2940	7.65755	3557	7.6577	3528			7.65747	2993	7.6575	3349	7.65743	3209	7.65742	2929	7.65742	2952	7.6577	3034
7.6641	3367	7.66402	3717	7.6641	3364	7.66397	2782	7.66402	3049	7.66412	2573			7.66408	3474	7.66415	3268	7.66408	3778	7.66417	2949	7.66402	3111	7.66417	3065			7.66393	2793	7.66397	3930	7.6639	2755	7.6639	3244	7.6639	3312	7.66417	3576
7.67057	2824	7.67048	3573	7.67057	3298	7.67043	2899	7.67048	2802	7.67058	2751			7.67057	3011	7.67062	3369	7.67057	3771	7.67063	2773	7.67048	2836	7.67063	3168			7.6704	2972	7.67043	2676	7.67037	3536	7.67037	3067	7.67037	3182	7.67063	2759
7.67703	2880	7.67695	3107	7.67703	2876	7.67692	2851	7.67695	2739	7.67705	3045			7.67703	3119	7.67708	3108	7.67703	2976	7.6771	2697	7.67695	3601	7.6771	3232			7.67687	3041	7.6769	3977	7.67683	3173	7.67683	3342	7.67683	3006	7.6771	3117
7.6835	2988	7.68343	3214	7.6835	3060	7.68338	2985	7.68342	2736	7.68352	3147			7.6835	3100	7.68355	3302	7.6835	3394	7.68357	2905	7.68342	3476	7.68357	3591			7.68333	3181	7.68337	3773	7.6833	3421	7.6833	3029	7.6833	3335	7.68358	3051
7.68997	3079	7.6899	3451	7.68998	3530	7.68985	2853	7.68988	2795	7.68998	2607			7.68997	2919	7.69002	3300	7.68997	3293	7.69003	3070	7.68988	3518	7.69003	3051			7.6898	3991	7.68983	3483	7.68977	3075	7.68977	3034	7.68977	2964	7.69005	3377
7.69643	2869	7.69637	2947	7.69645	3211	7.69632	2798	7.69635	2329	7.69647	3390			7.69643	3602	7.69648	3387	7.69643	3274	7.6965	2883	7.69635	3360	7.6965	3156			7.69628	2893	7.6963	3693	7.69623	3324	7.69623	3036	7.69623	3084	7.69652	3507
7.7029	2397	7.70283	4183	7.70292	3410	7.70278	2350	7.70282	3099	7.70293	2890			7.7029	3099	7.70297	3621	7.7029	3144	7.70297	3118	7.70282	3319	7.70298	2682			7.70275	2819	7.70277	3988	7.7027	3042	7.7027	3225	7.7027	3199	7.70298	3141
7.70938	2747	7.7093	3170	7.70938	3511	7.70925	3054	7.70928	2761	7.7094	3127			7.70937	3192	7.70943	3340	7.70937	3085	7.70945	3100	7.70928	2960	7.70945	3182			7.70922	3021	7.70923	2869	7.70918	3251	7.70917	2758	7.70917	3709	7.70945	3204
7.71585	2829	7.71577	3495	7.71585	2889	7.71572	2925	7.71577	2720	7.71587	2440			7.71583	2888	7.7159	3567	7.71583	2995	7.71592	2834	7.71577	2770	7.71592	2733			7.71568	3021	7.71572	3011	7.71565	3343	7.71565	3146	7.71565	2700	7.71592	3795
7.72232	2941	7.72223	3450	7.72232	3155	7.72218	2763	7.72223	2845	7.72233	7370			7.7223	3539	7.72237	3258	7.72232	3363	7.72238	3444	7.72223	3504	7.72238	3135			7.72215	2986	7.72218	3230	7.72212	2860	7.72212	2789	7.72212	3181	7.72238	2916
7.72878	3028	7.7287	2818	7.72878	3261	7.72865	2730	7.7287	2954	7.7288	5887			7.72878	3215	7.72883	3538	7.72878	3311	7.72885	2899	7.7287	3453	7.72885	2622			7.72862	2924	7.72865	3149	7.72858	2819	7.72858	2848	7.72858	2908	7.72885	3289
7.73525	3222	7.73518	3041	7.73525	3200	7.73513	3135	7.73517	2822	7.73527	7193			7.73525	3344	7.7353	3083	7.73525	2847	7.73532	2780	7.73517	2981	7.73532	3129			7.73508	3267	7.73512	3324	7.73505	3104	7.73505	3136	7.73505	3075	7.73532	3008
7.74172	3000	7.74165	3258	7.74173	3331	7.7416	2901	7.74163	3035	7.74173	6535			7.74172	3211	7.74177	3381	7.74172	3425	7.74178	2663	7.74163	3263	7.74178	3109			7.74155	3193	7.74158	3139	7.74152	3036	7.74152	2927	7.74152	3817	7.7418	3146
7.74818	3020	7.74812	3130	7.7482	3150	7.74807	2789	7.7481	2882	7.74822	7188			7.74818	3421	7.74823	3456	7.74818	3105	7.74825	2916	7.7481	3039	7.74825	3105			7.74803	3073	7.74805	3844	7.74798	2955	7.74798	2922	7.74798	2966	7.74827	3589
7.75465	2823	7.75458	2964	7.75467	3559	7.75453	2717	7.75457	2680	7.75468	4195			7.75465	2976	7.75472	3637	7.75465	3540	7.75472	2914	7.75457	2960	7.75472	3219			7.7545	3309	7.75452	2914	7.75445	3186	7.75445	2673	7.75445	2849	7.75473	3196
7.76112	3125	7.76105	3248	7.76113	3412	7.761	2952	7.76103	2444	7.76115	5986			7.76112	2948	7.76118	3593	7.76112	3000	7.7612	2712	7.76103	3144	7.7612	3514			7.76097	2791	7.76098	3391	7.76093	3375	7.76092	2713	7.76092	2885	7.7612	3548
7.7676	2933	7.76752	3037	7.7676	3039	7.76747	2882	7.76752	3013	7.76762	7263			7.76758	3413	7.76765	3630	7.76758	3261	7.76767	2902	7.76752	3057	7.76767	3236			7.76743	2741	7.76747	3002	7.7674	3312	7.76738	2957	7.76738	2963	7.76767	3195
7.77407	3207	7.77398	3203	7.77407	3194	7.77393	2795	7.77398	2803	7.77408	6768			7.77405	3170	7.77412	3196	7.77405	2845	7.77413	2446	7.77398	3575	7.77413	3096			7.7739	2978	7.77393	3118	7.77387	3211	7.77387	2834	7.77387	3223	7.77413	3042
7.78053	2751	7.78045	3152	7.78053	3616	7.7804	2644	7.78045	3118	7.78055	6827			7.78053	3335	7.78058	3224	7.78053	3541	7.7806	3027	7.78045	3765	7.7806	3296			7.78037	3126	7.7804	3752	7.78033	3101	7.78033	2845	7.78033	3095	7.7806	3398
7.787	2284	7.78692	3019	7.787	3185	7.78688	2934	7.78692	3112	7.78702	7864			7.787	2828	7.78705	2965	7.787	3047	7.78707	2884	7.78692	3059	7.78707	3112			7.78683	3118	7.78687	3127	7.7868	3078	7.7868	3284	7.7868	2935	7.78707	3159
7.79347	2862	7.7934	3216	7.79347	3437	7.79335	2997	7.79338	2854	7.79348	4113			7.79347	2705	7.79352	3024	7.79347	3374	7.79353	3004	7.79338	3193	7.79353	2992			7.7933	3125	7.79333	3168	7.79327	3224	7.79327	2750	7.79327	3350	7.79355	3366
7.79993	2586	7.79987	3009	7.79995	3022	7.79982	3082	7.79985	2813	7.79995	7025			7.79993	3695	7.79998	2724	7.79993	3190	7.8	2962	7.79985	3015	7.8	3181			7.79977	3126	7.7998	3456	7.79973	3463	7.79973	3381	7.79973	3439	7.80002	2827
7.8064	2977	7.80633	3173	7.80642	3037	7.80628	2558	7.80632	2923	7.80643	6474			7.8064	3040	7.80645	2821	7.8064	2926	7.80647	2874	7.80632	2922	7.80647	3378			7.80625	3448	7.80627	3197	7.8062	3388	7.8062	2779	7.8062	2931	7.80648	3225
7.81287	3171	7.8128	3603	7.81288	3418	7.81275	2704	7.81278	2722	7.8129	5683			7.81287	2946	7.81293	3245	7.81287	3589	7.81293	3084	7.81278	2977	7.81295	2691			7.81272	3015	7.81273	3116	7.81267	3373	7.81267	3060	7.81267	3203	7.81295	3158
7.81935	2904	7.81927	3128	7.81935	3102	7.81922	2379	7.81925	2703	7.81937	7064			7.81933	3620	7.8194	3723	7.81933	3249	7.81942	3109	7.81925	2858	7.81942	3363			7.81918	2980	7.8192	2917	7.81915	3264	7.81913	3082	7.81913	3138	7.81942	2689
7.82582	2989	7.82573	3287	7.82582	2818	7.82568	2631	7.82573	3172	7.82583	5871			7.8258	2903	7.82587	3648	7.8258	3570	7.82588	2880	7.82573	3032	7.82588	2986			7.82565	3129	7.82568	3304	7.82562	3181	7.82562	2856	7.82562	3007	7.82588	3265
7.83228	2926	7.8322	2879	7.83228	3387	7.83215	2924	7.8322	2980	7.8323	6441			7.83227	3092	7.83233	3730	7.83228	3487	7.83235	3265	7.8322	2961	7.83235	3164			7.83212	2817	7.83215	4090	7.83208	3219	7.83208	2772	7.83208	2840	7.83235	3206
7.83875	2952	7.83867	3040	7.83875	3139	7.83863	2434	7.83867	2804	7.83877	7426			7.83875	3063	7.8388	3558	7.83875	3015	7.83882	2607	7.83867	2698	7.83882	3229			7.83858	3422	7.83862	3405	7.83855	3115	7.83855	3099	7.83855	3111	7.83882	2861
7.84522	3173	7.84515	2844	7.84522	3128	7.8451	2933	7.84513	2644	7.84523	4492			7.84522	3140	7.84527	3479	7.84522	3006	7.84528	2959	7.84513	3140	7.84528	3089			7.84505	2933	7.84508	3331	7.84502	3145	7.84502	3128	7.84502	3343	7.84528	3500
7.85168	2771	7.85162	3012	7.8517	3180	7.85157	2737	7.8516	3484	7.8517	7321			7.85168	3603	7.85173	3069	7.85168	2843	7.85175	2898	7.8516	3083	7.85175	2948			7.85152	3115	7.85155	4512	7.85148	3141	7.85148	3187	7.85148	2899	7.85177	3520
7.85815	2757	7.85808	3422	7.85817	3278	7.85803	2720	7.85807	2669	7.85818	6049			7.85815	3219	7.8582	3051	7.85815	3436	7.85822	3129	7.85807	3119	7.85822	3715			7.858	3090	7.85802	3165	7.85795	3222	7.85795	3073	7.85795	2968	7.85823	3548
7.86462	2731	7.86455	3172	7.86463	3266	7.8645	2976	7.86453	3191	7.86465	6235			7.86462	2819	7.86468	3009	7.86462	3077	7.86468	3469	7.86453	2866	7.86468	3389			7.86447	2992	7.86448	3247	7.86442	3276	7.86442	3312	7.86442	3324	7.8647	3457
7.87108	3172	7.87102	3347	7.8711	3404	7.87097	2732	7.871	3061	7.87112	7646			7.87108	2912	7.87115	3394	7.87108	3217	7.87117	3112	7.871	3310	7.87117	3150			7.87093	2936	7.87095	2973	7.8709	3646	7.87088	2935	7.87088	3526	7.87117	4365
7.87757	2880	7.87748	3222	7.87757	3438	7.87743	2413	7.87748	3165	7.87758	4670			7.87755	3518	7.87762	3817	7.87755	3004	7.87763	3263	7.87748	2634	7.87763	2873			7.8774	2597	7.87743	4245	7.87737	3531	7.87735	3148	7.87735	3969	7.87763	4963
7.88403	3325	7.88395	3220	7.88403	3362	7.8839	2692	7.88395	2679	7.88405	7122			7.88402	3630	7.88408	3153	7.88402	3187	7.8841	3014	7.88395	3022	7.8841	3368			7.88387	3164	7.8839	3739	7.88383	2934	7.88383	2970	7.88383	3746	7.8841	5020
7.8905	3024	7.89042	3387	7.8905	3226	7.89037	2505	7.89042	3345	7.89052	7640			7.8905	3419	7.89055	2837	7.8905	3006	7.89057	2578	7.89042	3303	7.89057	2729			7.89033	3202	7.89037	3999	7.8903	2848	7.8903	3603	7.8903	4786	7.89057	4733
7.89697	2861	7.8969	3007	7.89697	3733	7.89685	2865	7.89688	2912	7.89698	6006			7.89697	3182	7.89702	3535	7.89697	3182	7.89703	3190	7.89688	2506	7.89703	3272			7.8968	2825	7.89683	4339	7.89677	3341	7.89677	3267	7.89677	5501	7.89703	4990
7.90343	3025	7.90337	3026	7.90343	3497	7.90332	2729	7.90335	2404	7.90345	7734			7.90343	3354	7.90348	3550	7.90343	3253	7.9035	3018	7.90335	3194	7.9035	2910			7.90327	4464	7.9033	3960	7.90323	3230	7.90323	3376	7.90323	5252	7.90352	5048
7.9099	3134	7.90983	3141	7.90992	3108	7.90978	2994	7.90982	3180	7.90992	4921			7.9099	3379	7.90995	3440	7.9099	3279	7.90997	2962	7.90982	3364	7.90997	3064			7.90975	3513	7.90977	4034	7.9097	3182	7.9097	3424	7.9097	4054	7.90998	4578
7.91637	3292	7.9163	3111	7.91638	3269	7.91625	2570	7.91628	2786	7.9164	6984			7.91637	3713	7.91642	3093	7.91637	3218	7.91643	3886	7.91628	3538	7.91643	2732			7.91622	3846	7.91623	3661	7.91617	3241	7.91617	3519	7.91617	5502	7.91645	5493
7.92283	2661	7.92277	3546	7.92285	3447	7.92272	3093	7.92275	3008	7.92287	7684			7.92283	3487	7.9229	2950	7.92283	3389	7.9229	3075	7.92275	3415	7.92292	3298			7.92268	4328	7.9227	4905	7.92263	3502	7.92263	3674	7.92263	4507	7.92292	4455
7.92932	3134	7.92923	3605	7.92932	3594	7.92918	2935	7.92922	3608	7.92933	6176			7.9293	4094	7.92937	4148	7.9293	3256	7.92938	2976	7.92922	3427	7.92938	3323			7.92915	3806	7.92917	4764	7.92912	3821	7.9291	3757	7.9291	5425	7.92938	5229
7.93578	3216	7.9357	3691	7.93578	3500	7.93565	3078	7.9357	3574	7.9358	7101			7.93577	3895	7.93583	4476	7.93577	3631	7.93585	3498	7.9357	3603	7.93585	3953			7.93562	4034	7.93565	4605	7.93558	3439	7.93558	3723	7.93558	5326	7.93585	5234
7.94225	3202	7.94217	3794	7.94225	3059	7.94212	3179	7.94217	3432	7.94227	5104			7.94223	3545	7.9423	4502	7.94225	3400	7.94232	2955	7.94217	3586	7.94232	2875			7.94208	4385	7.94212	4779	7.94205	3395	7.94205	4501	7.94205	4874	7.94232	5261
7.94872	3584	7.94863	3680	7.94872	3559	7.9486	3053	7.94863	2729	7.94873	7338			7.94872	3558	7.94877	4275	7.94872	3990	7.94878	3427	7.94863	3890	7.94878	3472			7.94855	4223	7.94858	4609	7.94852	3519	7.94852	3978	7.94852	4501	7.94878	4684
7.95518	2956	7.95512	3229	7.95518	3830	7.95507	3351	7.9551	3349	7.9552	6554			7.95518	3857	7.95523	3640	7.95518	3835	7.95525	3366	7.9551	3776	7.95525	3449			7.95502	3953	7.95505	4564	7.95498	3737	7.95498	4394	7.95498	4511	7.95527	4979
7.96165	3515	7.96158	3475	7.96167	3212	7.96153	3120	7.96157	2823	7.96167	6357			7.96165	3947	7.9617	3935	7.96165	3426	7.96172	3756	7.96157	3214	7.96172	3412			7.96148	5103	7.96152	4211	7.96145	3329	7.96145	4116	7.96145	3824	7.96173	4408
7.96812	2995	7.96805	3517	7.96813	3393	7.968	2914	7.96803	3242	7.96815	6303			7.96812	4298	7.96817	4478	7.96812	3293	7.96818	3382	7.96803	3813	7.96818	3488			7.96797	3708	7.96798	4038	7.96792	2874	7.96792	3480	7.96792	3864	7.9682	4069
7.97458	2765	7.97452	3077	7.9746	3338	7.97447	2980	7.9745	2724	7.97462	4993			7.97458	3258	7.97465	4277	7.97458	3885	7.97465	3197	7.9745	3593	7.97465	3254			7.97443	3786	7.97445	4156	7.97438	3416	7.97438	3185	7.97438	5099	7.97467	3591
7.98105	2967	7.98098	3139	7.98107	3218	7.98093	2995	7.98097	2890	7.98108	7341			7.98105	3289	7.98112	3892	7.98105	2869	7.98113	3187	7.98097	3305	7.98113	3436			7.9809	3754	7.98092	4145	7.98087	3955	7.98085	3991	7.98085	4047	7.98113	4815
7.98753	3093	7.98745	3462	7.98753	3356	7.9874	2760	7.98745	2366	7.98755	6249			7.98752	3152	7.98758	3011	7.98752	3016	7.9876	3126	7.98745	3509	7.9876	3501			7.98737	3828	7.9874	3370	7.98733	3665	7.98732	3509	7.98732	3925	7.9876	4268
7.994	2832	7.99392	3660	7.994	3052	7.99387	2427	7.99392	2675	7.99402	6365			7.99398	3060	7.99405	3455	7.99398	3786	7.99407	3186	7.99392	3256	7.99407	3080			7.99383	4105	7.99387	3249	7.9938	3123	7.9938	2877	7.9938	3991	7.99407	3908
8.00047	3414	8.00038	3309	8.00047	3452	8.00033	2470	8.00038	2752	8.00048	7180			8.00047	3631	8.00052	3667	8.00047	3602	8.00053	2804	8.00038	3221	8.00053	3481			8.0003	3659	8.00033	3556	8.00027	3184	8.00027	2939	8.00027	3556	8.00053	3398
8.00693	2751	8.00687	3353	8.00693	3211	8.00682	2297	8.00685	2951	8.00695	4843			8.00693	3190	8.00698	3671	8.00693	3429	8.007	3210	8.00685	3041	8.007	3362			8.00677	3423	8.0068	3417	8.00673	3152	8.00673	3298	8.00673	3254	8.007	3542
8.0134	2730	8.01333	3428	8.0134	3016	8.01328	3247	8.01332	3191	8.01342	6513			8.0134	3625	8.01345	3579	8.0134	3030	8.01347	2817	8.01332	3013	8.01347	3256			8.01323	3741	8.01327	3410	8.0132	3302	8.0132	3262	8.0132	3821	8.01348	3328
8.01987	2749	8.0198	2814	8.01988	3351	8.01975	2926	8.01978	2996	8.01988	5471			8.01987	3201	8.01992	2973	8.01987	3095	8.01993	2890	8.01978	2890	8.01993	3368			8.01972	3028	8.01973	3941	8.01967	3358	8.01967	2884	8.01967	3092	8.01995	3287
8.02633	3242	8.02627	3111	8.02635	3074	8.02622	2445	8.02625	3023	8.02637	6437			8.02633	2916	8.02638	3295	8.02633	3202	8.0264	3376	8.02625	3511	8.0264	2950			8.02618	3159	8.0262	3470	8.02613	3275	8.02613	2992	8.02613	3904	8.02642	3473
8.0328	2779	8.03273	3213	8.03282	3460	8.03268	2792	8.03272	2827	8.03283	6784			8.0328	2615	8.03287	2904	8.0328	3430	8.03287	3232	8.03272	3527	8.03288	3563			8.03265	3524	8.03267	3259	8.0326	3101	8.0326	3683	8.0326	3332	8.03288	3277
8.03928	2843	8.0392	3283	8.03928	2963	8.03915	3029	8.03918	2902	8.0393	5517			8.03927	3342	8.03933	4013	8.03927	3433	8.03935	2481	8.03918	3780	8.03935	3169			8.03912	2913	8.03913	3902	8.03908	3243	8.03907	3118	8.03907	3292	8.03935	3805
8.04575	2810	8.04567	3206	8.04575	2876	8.04562	2898	8.04567	3346	8.04577	6729			8.04573	2917	8.0458	3097	8.04573	3458	8.04582	2934	8.04567	3084	8.04582	3549			8.04558	3066	8.04562	3395	8.04555	2900	8.04555	2656	8.04555	3350	8.04582	3938
8.05222	2730	8.05213	3020	8.05222	2854	8.05208	2828	8.05213	3404	8.05223	4558			8.0522	3142	8.05227	3115	8.05222	3304	8.05228	3389	8.05213	2992	8.05228	3188			8.05205	3052	8.05208	3243	8.05202	3149	8.05202	3176	8.05202	2938	8.05228	3548
8.05868	3440	8.0586	3569	8.05868	3102	8.05857	3166	8.0586	2656	8.0587	6548			8.05868	3825	8.05873	3774	8.05868	3008	8.05875	2929	8.0586	3219	8.05875	2771			8.05852	2936	8.05855	3325	8.05848	3416	8.05848	3169	8.05848	3089	8.05875	3609
8.06515	3142	8.06508	3286	8.06515	3710	8.06503	3085	8.06507	3007	8.06517	7276			8.06515	3244	8.0652	3411	8.06515	3192	8.06522	3256	8.06507	3285	8.06522	3140			8.06498	3195	8.06502	3926	8.06495	2961	8.06495	3124	8.06495	2986	8.06523	3087
8.07162	2990	8.07155	3493	8.07163	3391	8.0715	2712	8.07153	2765	8.07163	5838			8.07162	3561	8.07167	3832	8.07162	3426	8.07168	3047	8.07153	3358	8.07168	3145			8.07145	3062	8.07148	2892	8.07142	3070	8.07142	3210	8.07142	3735	8.0717	3274
8.07808	2999	8.07802	3728	8.0781	3324	8.07797	3078	8.078	2884	8.07812	2553			8.07808	3255	8.07813	3193	8.07808	3272	8.07815	2920	8.078	3413	8.07815	3220			8.07793	2921	8.07795	3343	8.07788	3304	8.07788	2954	8.07788	3490	8.07817	3048
8.08455	2550	8.08448	3253	8.08457	3467	8.08443	2442	8.08447	3149	8.08458	2989			8.08455	2912	8.08462	3067	8.08455	3251	8.08462	2970	8.08447	2765	8.08462	3022			8.0844	3412	8.08442	3245	8.08435	3723	8.08435	3359	8.08435	3083	8.08463	4087
8.09103	3120	8.09095	3603	8.09103	3322	8.0909	2830	8.09093	2974	8.09105	2592			8.09102	2944	8.09108	3262	8.09102	3376	8.0911	3022	8.09093	3017	8.0911	3463			8.09087	2895	8.09088	3360	8.09083	3206	8.09082	3190	8.09082	3386	8.0911	3202
8.0975	2950	8.09742	3185	8.0975	3045	8.09737	3155	8.09742	2712	8.09752	2788			8.09748	2689	8.09755	2948	8.09748	3383	8.09757	3069	8.09742	2720	8.09757	3235			8.09733	3150	8.09737	3183	8.0973	3029	8.09728	3356	8.09728	3107	8.09757	3225
8.10397	3098	8.10388	3116	8.10397	3117	8.10383	2956	8.10388	2953	8.10398	2973			8.10395	3000	8.10402	3450	8.10395	3024	8.10403	2956	8.10388	3432	8.10403	3026			8.1038	3061	8.10383	3572	8.10377	3265	8.10377	3518	8.10377	3358	8.10403	3016
8.11043	2732	8.11035	3422	8.11043	3094	8.1103	3066	8.11035	2892	8.11045	2574			8.11043	2946	8.11048	3223	8.11043	2960	8.1105	2611	8.11035	3503	8.1105	2839			8.11027	2932	8.1103	3431	8.11023	3327	8.11023	2947	8.11023	3299	8.1105	3559
8.1169	3116	8.11683	3141	8.1169	3356	8.11678	2788	8.11682	2903	8.11692	3081			8.1169	3173	8.11695	3407	8.1169	3304	8.11697	3099	8.11682	3271	8.11697	3125			8.11673	2872	8.11677	2937	8.1167	3084	8.1167	3145	8.1167	2547	8.11697	3177
8.12337	3007	8.1233	3558	8.12337	3164	8.12325	2951	8.12328	2768	8.12338	2438			8.12337	3065	8.12342	2609	8.12337	2961	8.12343	2863	8.12328	2832	8.12343	3001			8.1232	2997	8.12323	3537	8.12317	3636	8.12317	2767	8.12317	3378	8.12345	3307
8.12983	3133	8.12977	2913	8.12985	3071	8.12972	2614	8.12975	3240	8.12985	2739			8.12983	2972	8.12988	3187	8.12983	3472	8.1299	2905	8.12975	3092	8.1299	2835			8.12968	3631	8.1297	3449	8.12963	3565	8.12963	3088	8.12963	3634	8.12992	3047
8.1363	2362	8.13623	3267	8.13632	3250	8.13618	2981	8.13622	3268	8.13633	2977			8.1363	3343	8.13635	3400	8.1363	2947	8.13637	2880	8.13622	2696	8.13637	3100			8.13615	3338	8.13617	3286	8.1361	3387	8.1361	3005	8.1361	3741	8.13638	2616
8.14277	2840	8.1427	3223	8.14278	3586	8.14265	2934	8.14268	2975	8.1428	2839			8.14277	2721	8.14283	3487	8.14277	3112	8.14283	2915	8.14268	3284	8.14285	3348			8.14262	3163	8.14263	3386	8.14257	3422	8.14257	2901	8.14257	3144	8.14285	3048
8.14925	3059	8.14917	2954	8.14925	3250	8.14912	3247	8.14915	2908	8.14927	2655			8.14923	3155	8.1493	2925	8.14923	3290	8.14932	2922	8.14915	2811	8.14932	2985			8.14908	3367	8.1491	3244	8.14905	3489	8.14903	2988	8.14903	2991	8.14932	3743
8.15572	2703	8.15563	2917	8.15572	3557	8.15558	2982	8.15563	2689	8.15573	3252			8.1557	3047	8.15577	3751	8.1557	3513	8.15578	3477	8.15563	3364	8.15578	2942			8.15555	2943	8.15558	3511	8.15552	3465	8.15552	2993	8.15552	3073	8.15578	3443
8.16218	2847	8.1621	3562	8.16218	3059	8.16205	3054	8.1621	3140	8.1622	2545			8.16217	3019	8.16223	3415	8.16218	3193	8.16225	2892	8.1621	3212	8.16225	3458			8.16202	3095	8.16205	3695	8.16198	3020	8.16198	2537	8.16198	3398	8.16225	3355
8.16865	3286	8.16857	2891	8.16865	3008	8.16853	2874	8.16857	2996	8.16867	2861			8.16865	3131	8.1687	3821	8.16865	3217	8.16872	2628	8.16857	3256	8.16872	3079			8.16848	3223	8.16852	3776	8.16845	3286	8.16845	2979	8.16845	3396	8.16872	3586
8.17512	2977	8.17505	2962	8.17512	3274	8.175	2906	8.17503	2603	8.17513	2723			8.17512	3592	8.17517	3226	8.17512	3139	8.17518	3335	8.17503	3338	8.17518	3126			8.17495	3010	8.17498	3260	8.17492	3322	8.17492	3073	8.17492	3612	8.1752	3461
8.18158	3272	8.18152	3342	8.1816	3504	8.18147	2742	8.1815	2813	8.1816	2928			8.18158	3011	8.18163	3469	8.18158	3266	8.18165	3033	8.1815	3159	8.18165	3107			8.18142	3453	8.18145	3068	8.18138	3234	8.18138	3462	8.18138	3243	8.18167	3021
8.18805	2955	8.18798	3143	8.18807	3168	8.18793	3166	8.18797	2737	8.18808	2645			8.18805	3288	8.1881	3344	8.18805	3337	8.18812	2923	8.18797	2798	8.18812	3278			8.1879	2734	8.18792	2774	8.18785	3962	8.18785	2836	8.18785	3960	8.18813	3712
8.19452	2612	8.19445	3260	8.19453	3126	8.1944	2845	8.19443	2745	8.19455	3056			8.19452	3346	8.19458	2903	8.19452	2984	8.19458	3089	8.19443	3325	8.19458	3250			8.19437	3352	8.19438	3531	8.19432	3271	8.19432	2786	8.19432	3414	8.1946	3193
8.201	2885	8.20092	3040	8.201	2987	8.20087	2679	8.2009	2661	8.20102	3191			8.20098	3222	8.20105	3245	8.20098	2905	8.20107	2670	8.2009	3265	8.20107	2971			8.20083	2842	8.20085	3691	8.2008	3409	8.20078	3077	8.20078	2931	8.20107	3224
8.20747	3209	8.20738	2675	8.20747	3442	8.20733	2528	8.20738	3170	8.20748	7544			8.20745	3177	8.20752	3740	8.20745	2954	8.20753	2843	8.20738	3428	8.20753	3286			8.2073	3398	8.20733	3418	8.20727	3404	8.20727	2763	8.20727	2919	8.20753	3283
8.21393	2636	8.21385	3318	8.21393	3124	8.2138	2301	8.21385	2987	8.21395	5675			8.21392	3618	8.21398	3293	8.21393	3722	8.214	2810	8.21385	3169	8.214	3105			8.21377	3247	8.2138	3926	8.21373	3438	8.21373	2858	8.21373	3399	8.214	3239
8.2204	2853	8.22032	3315	8.2204	3197	8.22027	2852	8.22032	3350	8.22042	7010			8.2204	3542	8.22045	3111	8.2204	3315	8.22047	3376	8.22032	3468	8.22047	3182			8.22023	2987	8.22027	2575	8.2202	3353	8.2202	3220	8.2202	3609	8.22047	3132
8.22687	3044	8.2268	3125	8.22687	3024	8.22675	3096	8.22678	2990	8.22688	6817			8.22687	3087	8.22692	3238	8.22687	3612	8.22693	3056	8.22678	2843	8.22693	3170			8.2267	3195	8.22673	3252	8.22667	3111	8.22667	2993	8.22667	3250	8.22693	3204
8.23333	2912	8.23327	3577	8.23335	3161	8.23322	2605	8.23325	3171	8.23335	7882			8.23333	3194	8.23338	3426	8.23333	2999	8.2334	2830	8.23325	3275	8.2334	2840			8.23317	2713	8.2332	3478	8.23313	3037	8.23313	2655	8.23313	3083	8.23342	3409
8.2398	2891	8.23973	2775	8.23982	3440	8.23968	3231	8.23972	2772	8.23982	7246			8.2398	3436	8.23985	3390	8.2398	3534	8.23987	2868	8.23972	2802	8.23987	3059			8.23965	3429	8.23967	3057	8.2396	3439	8.2396	3678	8.2396	3539	8.23988	3683
8.24627	2740	8.2462	3459	8.24628	3258	8.24615	2948	8.24618	2527	8.2463	5082			8.24627	3000	8.24633	2942	8.24627	2892	8.24633	2927	8.24618	2808	8.24633	3026			8.24612	2971	8.24613	3548	8.24607	3759	8.24607	3279	8.24607	3763	8.24635	3600
8.25273	3229	8.25267	3322	8.25275	3115	8.25262	2992	8.25265	2591	8.25277	6807			8.25273	3419	8.2528	3200	8.25273	2929	8.25282	3043	8.25265	3697	8.25282	3483			8.25258	3100	8.2526	3337	8.25253	3418	8.25253	3161	8.25253	3482	8.25282	3205
8.25922	2926	8.25913	3248	8.25922	3323	8.25908	2660	8.25913	2648	8.25923	7225			8.2592	3693	8.25927	3444	8.2592	3639	8.25928	2824	8.25913	3686	8.25928	3244			8.25905	2919	8.25908	2834	8.25902	2904	8.259	2897	8.259	3736	8.25928	3909
8.26568	2603	8.2656	3550	8.26568	3013	8.26555	3297	8.2656	2727	8.2657	5115			8.26567	3427	8.26573	3726	8.26567	3227	8.26575	3292	8.2656	3589	8.26575	3317			8.26552	3507	8.26555	4511	8.26548	3647	8.26548	3556	8.26548	3525	8.26575	3321
8.27215	2978	8.27207	2988	8.27215	3187	8.27202	2510	8.27207	3167	8.27217	7097			8.27215	3325	8.2722	3182	8.27215	3032	8.27222	2625	8.27207	3616	8.27222	3341			8.27198	2679	8.27202	3092	8.27195	3603	8.27195	2967	8.27195	3267	8.27222	3825
8.27862	2648	8.27853	3174	8.27862	2816	8.2785	2477	8.27853	3061	8.27863	6121			8.27862	4065	8.27867	3536	8.27862	3367	8.27868	3050	8.27853	3981	8.27868	3421			8.27845	2963	8.27848	3081	8.27842	3422	8.27842	3206	8.27842	3700	8.27868	3429
8.28508	3100	8.28502	3600	8.28508	3400	8.28497	2673	8.285	3084	8.2851	6246			8.28508	3331	8.28513	2891	8.28508	2926	8.28515	2893	8.285	3669	8.28515	3357			8.28492	2982	8.28495	3575	8.28488	3038	8.28488	2709	8.28488	3917	8.28517	3461
8.29155	2988	8.29148	3520	8.29157	3002	8.29143	2892	8.29147	2532	8.29157	7003			8.29155	3557	8.2916	3616	8.29155	3071	8.29162	3278	8.29147	3305	8.29162	3233			8.29138	3241	8.29142	3669	8.29135	3573	8.29135	2820	8.29135	3462	8.29163	3040
8.29802	2817	8.29795	3117	8.29803	3151	8.2979	2601	8.29793	3218	8.29805	4459			8.29802	3319	8.29807	3095	8.29802	3260	8.29808	2713	8.29793	3304	8.29808	3237			8.29787	3128	8.29788	3572	8.29782	3390	8.29782	3212	8.29782	3688	8.2981	3083
8.30448	2811	8.30442	3661	8.3045	3088	8.30437	2957	8.3044	2868	8.30452	7240			8.30448	2849	8.30455	3451	8.30448	3624	8.30455	3020	8.3044	3792	8.30457	3529			8.30433	3097	8.30435	3302	8.30428	3463	8.30428	2862	8.30428	2856	8.30457	3061
8.31097	2858	8.31088	3396	8.31097	2748	8.31083	2734	8.31087	2959	8.31098	6648			8.31095	2774	8.31102	3925	8.31095	3150	8.31103	2782	8.31087	3459	8.31103	3211			8.3108	2981	8.31082	3642	8.31077	3522	8.31075	2805	8.31075	3269	8.31103	2721
8.31743	3017	8.31735	3112	8.31743	3022	8.3173	3106	8.31735	2866	8.31745	6383			8.31742	3033	8.31748	3234	8.31742	2952	8.3175	2929	8.31735	3219	8.3175	3454			8.31727	3153	8.3173	3266	8.31723	3567	8.31723	3127	8.31723	3128	8.3175	3450
8.3239	3228	8.32382	3482	8.3239	3310	8.32377	2569	8.32382	2901	8.32392	7155			8.32388	3087	8.32395	3666	8.3239	3295	8.32397	3122	8.32382	3409	8.32397	2927			8.32373	3190	8.32377	3565	8.3237	3154	8.3237	2822	8.3237	3453	8.32397	3397
8.33037	3195	8.33028	3236	8.33037	3117	8.33023	2406	8.33028	2895	8.33038	4836			8.33037	3355	8.33042	2994	8.33037	3212	8.33043	2642	8.33028	3015	8.33043	3661			8.3302	2721	8.33023	3901	8.33017	2729	8.33017	2806	8.33017	4037	8.33043	2912
8.33683	3122	8.33677	3440	8.33683	3538	8.33672	2795	8.33675	2943	8.33685	6120			8.33683	3241	8.33688	3635	8.33683	3044	8.3369	2820	8.33675	3021	8.3369	3116			8.33667	3007	8.3367	3211	8.33663	3065	8.33663	3785	8.33663	4312	8.3369	2994
8.3433	2797	8.34323	3043	8.34332	3224	8.34318	2715	8.34322	3349	8.34332	6937			8.3433	3379	8.34335	3227	8.3433	3256	8.34337	2854	8.34322	3124	8.34337	3354			8.34313	3075	8.34317	3192	8.3431	3294	8.3431	2584	8.3431	4510	8.34338	3283
8.34977	3208	8.3497	3344	8.34978	2735	8.34965	2787	8.34968	2573	8.3498	6027			8.34977	3117	8.34982	3335	8.34977	3108	8.34983	2780	8.34968	3386	8.34983	3121			8.34962	3458	8.34963	3528	8.34957	3448	8.34957	3499	8.34957	4102	8.34985	3237
8.35623	2705	8.35617	3303	8.35625	3384	8.35612	3136	8.35615	2751	8.35627	7083			8.35623	3265	8.3563	3858	8.35623	3264	8.3563	3216	8.35615	3000	8.3563	3345			8.35608	3354	8.3561	2679	8.35603	3381	8.35603	3087	8.35603	4580	8.35632	2629
8.3627	3276	8.36263	2775	8.36272	3167	8.36258	2395	8.36262	2909	8.36273	4541			8.3627	3582	8.36277	3463	8.3627	3497	8.36278	3115	8.36262	2778	8.36278	2939			8.36255	3451	8.36257	3153	8.3625	3057	8.3625	3010	8.3625	5037	8.36278	3072
8.36918	3052	8.3691	2808	8.36918	2843	8.36905	2644	8.3691	2770	8.3692	6764			8.36917	3681	8.36923	3508	8.36917	3491	8.36925	2857	8.3691	2991	8.36925	3261			8.36902	3211	8.36905	3675	8.36898	3642	8.36897	2910	8.36897	5326	8.36925	2999
8.37565	2745	8.37557	2936	8.37565	3195	8.37552	2681	8.37557	2644	8.37567	7274			8.37563	3012	8.3757	3673	8.37563	3492	8.37572	2739	8.37557	3221	8.37572	3586			8.37548	3539	8.37552	3623	8.37545	3296	8.37545	3006	8.37545	4305	8.37572	3210
8.38212	3068	8.38203	3187	8.38212	3318	8.38198	2821	8.38203	2818	8.38213	6117			8.38212	3760	8.38217	3477	8.38212	3299	8.38218	3305	8.38203	3104	8.38218	3370			8.38195	3152	8.38198	3612	8.38192	3231	8.38192	2924	8.38192	5549	8.38218	4108
8.38858	3045	8.3885	3484	8.38858	3605	8.38847	2462	8.3885	2924	8.3886	6326			8.38858	3526	8.38863	3386	8.38858	3375	8.38865	3223	8.3885	3650	8.38865	2864			8.38842	3848	8.38845	3796	8.38838	2975	8.38838	3407	8.38838	7895	8.38865	4468
8.39505	2849	8.39498	3335	8.39505	3224	8.39493	3096	8.39497	3227	8.39507	4537			8.39505	2893	8.3951	3398	8.39505	2837	8.39512	3094	8.39497	3775	8.39512	2991			8.39488	3503	8.39492	5595	8.39485	3158	8.39485	3130	8.39485	9678	8.39513	6219
8.40152	3090	8.40145	3391	8.40153	3183	8.4014	2846	8.40143	3323	8.40153	6692			8.40152	3284	8.40157	3506	8.40152	2964	8.40158	3154	8.40143	4317	8.40158	2974			8.40135	3476	8.40138	5755	8.40132	3417	8.40132	3507	8.40132	10639	8.4016	7918
8.40798	3139	8.40792	3423	8.408	2728	8.40787	2765	8.4079	3768	8.40802	7251			8.40798	4091	8.40803	3557	8.40798	3604	8.40805	2986	8.4079	4306	8.40805	3207			8.40783	3717	8.40785	6103	8.40778	3034	8.40778	4905	8.40778	11862	8.40807	9194
8.41445	3405	8.41438	2910	8.41447	3402	8.41433	2781	8.41437	3856	8.41448	5894			8.41445	4568	8.41452	3613	8.41445	3316	8.41452	3050	8.41437	4650	8.41453	3554			8.4143	4826	8.41432	7258	8.41425	3858	8.41425	6423	8.41425	13360	8.41453	8942
8.42093	3391	8.42085	3461	8.42093	3320	8.4208	2704	8.42083	4699	8.42095	7779			8.42092	4400	8.42098	3330	8.42092	2765	8.421	2992	8.42083	4841	8.421	3586			8.42077	5729	8.42078	7519	8.42073	3640	8.42072	6277	8.42072	12990	8.421	9505
8.4274	3299	8.42732	3135	8.4274	3280	8.42727	2797	8.42732	3682	8.42742	4922			8.42738	4114	8.42745	3546	8.42738	3393	8.42747	2769	8.42732	4660	8.42747	3237			8.42723	6107	8.42727	7629	8.4272	3520	8.4272	6319	8.4272	11862	8.42747	8985
8.43387	3062	8.43378	3182	8.43387	3285	8.43373	2655	8.43378	3819	8.43388	7031			8.43385	4232	8.43392	3082	8.43387	3263	8.43393	3322	8.43378	4737	8.43393	3533			8.4337	5986	8.43373	7389	8.43367	3272	8.43367	6909	8.43367	10385	8.43393	7895
8.44033	2729	8.44025	3123	8.44033	5084	8.44022	2952	8.44025	4097	8.44035	7652			8.44033	3686	8.44038	3362	8.44033	3814	8.4404	2909	8.44025	5090	8.4404	3529			8.44017	5196	8.4402	6689	8.44013	3200	8.44013	5569	8.44013	8532	8.4404	7116
8.4468	3328	8.44673	6215	8.4468	12104	8.44668	4939	8.44672	7763	8.44682	9673			8.4468	4102	8.44685	4293	8.4468	5774	8.44687	3352	8.44672	5598	8.44687	3632			8.44663	5574	8.44667	5481	8.4466	3143	8.4466	6061	8.4466	8514	8.44687	7246
8.45327	5820	8.4532	18245	8.45328	33176	8.45315	14186	8.45318	17845	8.45328	19414			8.45327	4127	8.45332	7291	8.45327	12673	8.45333	4879	8.45318	12014	8.45333	6031			8.4531	5413	8.45313	5443	8.45307	3669	8.45307	5826	8.45307	7677	8.45335	6294
8.45973	15266	8.45967	46497	8.45975	97643	8.45962	44117	8.45965	51127	8.45977	49006			8.45973	6439	8.45978	17024	8.45973	36254	8.4598	8848	8.45965	31067	8.4598	12964			8.45958	5145	8.4596	5150	8.45953	3925	8.45953	6221	8.45953	8634	8.45982	6592
8.4662	34966	8.46613	122566	8.46622	252882	8.46608	118745	8.46612	140103	8.46623	134147			8.4662	14470	8.46627	40419	8.4662	91669	8.46627	19346	8.46612	80671	8.46627	34997			8.46605	5601	8.46607	6106	8.466	3443	8.466	7744	8.466	12388	8.46628	6691
8.47267	81125	8.4726	284345	8.47268	591893	8.47255	289814	8.47258	340090	8.4727	308959			8.47267	30975	8.47273	91903	8.47267	210946	8.47275	43818	8.47258	188125	8.47275	74189			8.47252	4916	8.47253	7355	8.47248	3697	8.47247	12521	8.47247	21365	8.47275	7674
8.47915	166382	8.47907	588088	8.47915	1213652	8.47902	630380	8.47907	701715	8.47917	633224			8.47913	65731	8.4792	187259	8.47913	449510	8.47922	92664	8.47907	399745	8.47922	158077			8.47898	7061	8.47902	11688	8.47895	4635	8.47893	22271	8.47893	37289	8.47922	10772
8.48562	308351	8.48553	1040398	8.48562	2130595	8.48548	1167742	8.48553	1287812	8.48563	1118134			8.4856	114511	8.48567	339062	8.4856	828062	8.48568	170048	8.48553	738098	8.48568	274698			8.48545	8916	8.48548	16006	8.48542	6140	8.48542	40003	8.48542	64441	8.48568	14604
8.49208	478925	8.492	1583434	8.49208	3259012	8.49195	1878538	8.492	2056592	8.4921	1706637			8.49208	180968	8.49213	513257	8.49208	1330340	8.49215	284329	8.492	1170734	8.49215	432676			8.49192	13583	8.49195	21829	8.49188	8412	8.49188	63565	8.49188	94925	8.49215	20470
8.49855	654332	8.49847	2071891	8.49855	4514382	8.49843	2590467	8.49847	2803556	8.49857	2280568			8.49855	259405	8.4986	694349	8.49855	1804972	8.49862	396191	8.49847	1583207	8.49862	586891			8.49838	18296	8.49842	30101	8.49835	11728	8.49835	86659	8.49835	135551	8.49862	28952
8.50502	753635	8.50495	2409188	8.50502	5520486	8.5049	3101853	8.50493	3333869	8.50503	2639996			8.50502	310792	8.50507	796879	8.50502	2143074	8.50508	479927	8.50493	1874946	8.50508	676511			8.50485	22535	8.50488	36267	8.50482	15411	8.50482	108536	8.50482	160817	8.5051	34810
8.51148	765842	8.51142	2419712	8.5115	6040567	8.51137	3304332	8.5114	3540805	8.5115	2701443			8.51148	325974	8.51153	787936	8.51148	2219481	8.51155	508565	8.5114	1931120	8.51155	688212			8.51132	24193	8.51135	40320	8.51128	15001	8.51128	121971	8.51128	168146	8.51157	37366
8.51795	682412	8.51788	2116692	8.51797	5849097	8.51783	3056682	8.51787	3301316	8.51798	2420174			8.51795	304538	8.518	701485	8.51795	1995234	8.51802	469835	8.51787	1754253	8.51802	608060			8.5178	23296	8.51782	36437	8.51775	16044	8.51775	115110	8.51775	156085	8.51803	34370
8.52442	526939	8.52435	1633450	8.52443	4889851	8.5243	2469753	8.52433	2660104	8.52445	1876549			8.52442	250076	8.52448	551863	8.52442	1573569	8.52448	373481	8.52433	1394530	8.5245	491444			8.52427	23005	8.52428	31171	8.52422	14309	8.52422	94912	8.52422	127215	8.5245	30596
8.5309	366857	8.53082	1091823	8.5309	3508699	8.53077	1750338	8.5308	1874398	8.53092	1296872			8.53088	180365	8.53095	382930	8.53088	1101869	8.53097	268380	8.5308	983256	8.53097	339027			8.53073	17290	8.53075	23686	8.5307	12416	8.53068	72523	8.53068	96873	8.53097	22294
8.53737	234541	8.53728	664141	8.53737	2149862	8.53723	1103121	8.53728	1153578	8.53738	798450			8.53735	117201	8.53742	234311	8.53735	678244	8.53743	169607	8.53728	605806	8.53743	208682			8.5372	13011	8.53723	15767	8.53717	9822	8.53717	47894	8.53717	62872	8.53743	16533
8.54383	131125	8.54375	357442	8.54383	1170546	8.5437	611838	8.54375	629792	8.54385	439693			8.54382	69057	8.54388	134549	8.54383	384422	8.5439	98650	8.54375	339617	8.5439	117121			8.54367	10440	8.5437	10617	8.54363	6456	8.54363	29582	8.54363	35896	8.5439	11323
8.5503	65578	8.55022	175687	8.5503	562766	8.55018	305815	8.55022	310505	8.55032	216625			8.5503	38382	8.55035	69691	8.5503	190940	8.55037	54579	8.55022	173714	8.55037	62559			8.55013	7135	8.55017	7522	8.5501	4722	8.5501	17213	8.5501	21135	8.55037	7088
8.55677	32710	8.5567	85672	8.55677	255167	8.55665	146505	8.55668	144936	8.55678	102831			8.55677	20300	8.55682	35570	8.55677	95915	8.55683	28403	8.55668	84483	8.55683	32091			8.5566	5826	8.55663	5114	8.55657	3822	8.55657	10151	8.55657	13151	8.55685	5944
8.56323	20633	8.56317	47096	8.56325	121404	8.56312	71350	8.56315	71965	8.56325	52830			8.56323	11906	8.56328	23230	8.56323	49342	8.5633	15841	8.56315	46142	8.5633	21761			8.56307	4749	8.5631	5695	8.56303	4592	8.56303	7730	8.56303	10904	8.56332	5858
8.5697	18033	8.56963	44149	8.56972	91096	8.56958	54485	8.56962	53867	8.56973	45202			8.5697	9752	8.56975	27899	8.5697	42353	8.56977	14175	8.56962	43228	8.56977	24327			8.56955	4673	8.56957	7088	8.5695	7986	8.5695	6752	8.5695	12020	8.56978	7450
8.57617	23090	8.5761	62059	8.57618	131691	8.57605	72909	8.57608	71102	8.5762	64429			8.57617	13135	8.57623	45567	8.57617	57352	8.57623	19074	8.57608	65533	8.57623	41666			8.57602	4718	8.57603	12006	8.57597	13334	8.57597	11081	8.57597	18395	8.57625	13218
8.58263	38605	8.58257	98907	8.58265	220120	8.58252	122330	8.58255	112895	8.58267	107887			8.58263	21336	8.5827	76342	8.58263	96843	8.58272	32138	8.58255	107700	8.58272	73028			8.58248	6991	8.5825	18248	8.58245	26164	8.58243	16378	8.58243	29052	8.58272	22228
8.58912	59593	8.58903	157570	8.58912	362747	8.58898	195765	8.58903	184397	8.58913	168518			8.5891	31502	8.58917	122294	8.5891	150915	8.58918	49810	8.58903	178861	8.58918	113301			8.58895	9141	8.58898	28914	8.58892	42238	8.5889	25684	8.5889	47722	8.58918	34815
8.59558	84130	8.5955	211855	8.59558	535559	8.59545	291169	8.5955	265202	8.5956	241124			8.59557	45543	8.59563	168346	8.59557	213751	8.59565	70809	8.5955	254553	8.59565	156933			8.59542	15626	8.59545	42854	8.59538	62824	8.59538	36306	8.59538	69120	8.59565	49878
8.60205	104526	8.60197	270162	8.60205	679360	8.60192	369555	8.60197	340420	8.60207	294688			8.60205	57303	8.6021	216842	8.60205	272817	8.60212	92367	8.60197	327296	8.60212	199405			8.60188	19399	8.60192	51038	8.60185	87354	8.60185	48734	8.60185	85177	8.60212	65997
8.60852	116722	8.60845	291219	8.60852	752176	8.6084	422379	8.60843	378710	8.60853	330467			8.60852	64593	8.60857	229790	8.60852	305512	8.60858	105878	8.60843	369370	8.60858	221326			8.60835	22081	8.60838	57491	8.60832	103915	8.60832	55829	8.60832	95356	8.60858	75626
8.61498	114736	8.61492	282483	8.61498	726491	8.61487	421699	8.6149	383613	8.615	325179			8.61498	68222	8.61503	222598	8.61498	303186	8.61505	110036	8.6149	362480	8.61505	213436			8.61482	24444	8.61485	57253	8.61478	111705	8.61478	60593	8.61478	94397	8.61507	75139
8.62145	101362	8.62138	237652	8.62147	626038	8.62133	373954	8.62137	327461	8.62147	274223			8.62145	63098	8.6215	189434	8.62145	270176	8.62152	95221	8.62137	315462	8.62152	185698			8.6213	23742	8.62132	52060	8.62125	102316	8.62125	55307	8.62125	86623	8.62153	68502
8.62792	80524	8.62785	191667	8.62793	474083	8.6278	293152	8.62783	253574	8.62795	207748			8.62792	49018	8.62797	147467	8.62792	206637	8.62798	76961	8.62783	250490	8.62798	142004			8.62777	21384	8.62778	41260	8.62772	86151	8.62772	45033	8.62772	68117	8.628	55304
8.63438	54483	8.63432	130034	8.6344	319806	8.63427	206222	8.6343	179255	8.63442	148994			8.63438	36310	8.63445	101547	8.63438	145727	8.63445	57832	8.6343	176003	8.63447	100946			8.63423	15916	8.63425	31752	8.63418	63804	8.63418	35072	8.63418	51315	8.63447	41212
8.64087	36033	8.64078	81180	8.64087	203552	8.64073	132561	8.64077	116167	8.64088	95146			8.64085	24378	8.64092	65345	8.64085	92494	8.64093	38676	8.64077	110454	8.64093	63605			8.6407	11224	8.64072	21372	8.64067	43618	8.64065	24220	8.64065	32009	8.64093	29188
8.64733	21933	8.64725	47368	8.64733	111985	8.6472	78738	8.64725	66340	8.64735	54583			8.64732	17251	8.64738	38740	8.64732	54283	8.6474	23264	8.64725	65668	8.6474	38634			8.64717	7554	8.6472	13778	8.64713	26574	8.64713	16316	8.64713	20295	8.6474	16879
8.6538	13593	8.65372	26077	8.6538	60801	8.65367	42492	8.65372	36789	8.65382	30091			8.65378	9835	8.65385	19368	8.6538	29121	8.65387	13811	8.65372	34940	8.65387	21440			8.65363	6532	8.65367	8734	8.6536	16050	8.6536	9437	8.6536	12128	8.65387	11556
8.66027	7842	8.66018	15350	8.66027	29157	8.66015	21363	8.66018	20522	8.66028	16931			8.66027	6054	8.66032	11620	8.66027	17373	8.66033	9063	8.66018	19349	8.66033	12874			8.6601	4200	8.66013	6029	8.66007	9076	8.66007	5665	8.66007	7072	8.66033	6790
8.66673	4920	8.66667	7999	8.66673	15876	8.66662	12325	8.66665	11504	8.66675	8587			8.66673	4270	8.66678	6736	8.66673	10152	8.6668	4965	8.66665	11000	8.6668	7152			8.66657	3375	8.6666	3897	8.66653	6213	8.66653	4560	8.66653	6189	8.66682	4772
8.6732	3683	8.67313	6431	8.67322	9987	8.67308	8580	8.67312	6660	8.67322	5846			8.6732	3625	8.67325	4901	8.6732	5884	8.67327	3631	8.67312	6571	8.67327	4837			8.67303	3616	8.67307	3767	8.673	4831	8.673	2652	8.673	3452	8.67328	4145
8.67967	3968	8.6796	4563	8.67968	6705	8.67955	5526	8.67958	5015	8.6797	4470			8.67967	3702	8.67972	3777	8.67967	5139	8.67973	2989	8.67958	4998	8.67973	3816			8.67952	2954	8.67953	3883	8.67947	3797	8.67947	3068	8.67947	4249	8.67975	3762
8.68613	3103	8.68607	4498	8.68615	6520	8.68602	4077	8.68605	4406	8.68617	3923			8.68613	3229	8.6862	4231	8.68613	4585	8.6862	3021	8.68605	4100	8.6862	3428			8.68598	3180	8.686	3235	8.68593	3192	8.68593	2915	8.68593	4562	8.68622	3591
8.69262	3010	8.69253	4521	8.69262	5177	8.69248	3691	8.69252	4379	8.69263	5763			8.6926	3156	8.69267	3560	8.6926	4366	8.69268	3271	8.69252	4315	8.69268	3398			8.69245	3971	8.69247	3035	8.69242	2943	8.6924	2981	8.6924	3413	8.69268	3399
8.69908	3427	8.699	4233	8.69908	5361	8.69895	4462	8.699	3550	8.6991	6517			8.69907	3060	8.69913	4213	8.69907	4053	8.69915	3821	8.699	3718	8.69915	3566			8.69892	3265	8.69895	3421	8.69888	3184	8.69887	2794	8.69887	3417	8.69915	3678
8.70555	3218	8.70547	3996	8.70555	5284	8.70542	3730	8.70547	3689	8.70557	7469			8.70553	3538	8.7056	3571	8.70553	3413	8.70562	2888	8.70547	4059	8.70562	3193			8.70538	2730	8.70542	3042	8.70535	3401	8.70535	2926	8.70535	3152	8.70562	3527
8.71202	2940	8.71193	3806	8.71202	6054	8.71188	3566	8.71193	3301	8.71203	7768			8.71202	3788	8.71207	3477	8.71202	4101	8.71208	3049	8.71193	3980	8.71208	3171			8.71185	2734	8.71188	3728	8.71182	3233	8.71182	3055	8.71182	2996	8.71208	2928
8.71848	3152	8.71842	3823	8.71848	4960	8.71837	3177	8.7184	4370	8.7185	5807			8.71848	3030	8.71853	3870	8.71848	4258	8.71855	2853	8.7184	3763	8.71855	3401			8.71832	2979	8.71835	3344	8.71828	2756	8.71828	3379	8.71828	3426	8.71855	3371
8.72495	2978	8.72488	3813	8.72495	4750	8.72483	3236	8.72487	4218	8.72497	7846			8.72495	3563	8.725	3863	8.72495	3520	8.72502	3581	8.72487	3463	8.72502	2735			8.72478	3171	8.72482	3474	8.72475	3327	8.72475	2965	8.72475	3795	8.72503	3203
8.73142	3115	8.73135	4038	8.73143	5037	8.7313	3785	8.73133	3816	8.73143	8029			8.73142	2540	8.73147	4259	8.73142	3727	8.73148	3428	8.73133	4025	8.73148	3114			8.73127	3081	8.73128	3507	8.73122	3402	8.73122	3105	8.73122	3766	8.7315	3116
8.73788	2580	8.73782	3943	8.7379	5375	8.73777	3828	8.7378	3539	8.73792	4534			8.73788	3118	8.73793	3079	8.73788	4107	8.73795	2888	8.7378	4034	8.73795	3128			8.73773	2940	8.73775	3296	8.73768	3211	8.73768	3065	8.73768	3529	8.73797	2915
8.74435	3503	8.74428	3558	8.74437	4491	8.74423	3558	8.74427	3599	8.74438	7600			8.74435	3160	8.74442	3519	8.74435	3824	8.74442	3184	8.74427	3256	8.74443	3298			8.7442	3101	8.74422	3388	8.74415	3217	8.74415	3310	8.74415	3164	8.74443	3104
8.75083	3358	8.75075	3812	8.75083	4172	8.7507	3004	8.75073	3110	8.75085	8415			8.75082	3043	8.75088	3497	8.75082	3855	8.7509	3119	8.75073	3639	8.7509	3457			8.75067	3218	8.75068	3048	8.75063	3417	8.75062	2982	8.75062	3450	8.7509	3203
8.7573	3078	8.75722	3474	8.7573	4626	8.75717	3357	8.75722	4758	8.75732	6801			8.75728	3070	8.75735	3795	8.75728	3436	8.75737	2740	8.75722	3687	8.75737	3022			8.75713	3242	8.75717	2782	8.7571	3776	8.7571	3151	8.7571	3018	8.75737	3519
8.76377	2790	8.76368	3982	8.76377	4827	8.76363	3357	8.76368	3560	8.76378	7575			8.76375	3519	8.76382	3580	8.76377	3694	8.76383	3038	8.76368	3409	8.76383	3057			8.7636	3097	8.76363	3357	8.76357	3398	8.76357	3302	8.76357	3738	8.76383	3798
8.77023	2872	8.77015	3897	8.77023	4647	8.77012	3543	8.77015	3121	8.77025	6164			8.77023	3302	8.77028	3276	8.77023	3570	8.7703	3461	8.77015	3518	8.7703	3349			8.77007	3264	8.7701	3389	8.77003	3342	8.77003	2740	8.77003	3544	8.7703	3106
8.7767	2949	8.77663	3247	8.7767	4260	8.77658	3080	8.77662	3362	8.77672	6479			8.7767	3292	8.77675	3319	8.7767	4048	8.77677	3030	8.77662	3460	8.77677	3091			8.77653	2615	8.77657	3221	8.7765	3479	8.7765	3142	8.7765	3207	8.77678	3173
8.78317	2714	8.7831	4173	8.78318	3538	8.78305	3440	8.78308	3515	8.78318	7467			8.78317	3523	8.78322	3177	8.78317	3577	8.78323	2976	8.78308	2956	8.78323	2678			8.783	3406	8.78303	3171	8.78297	3371	8.78297	2799	8.78297	3086	8.78325	3000
8.78963	2889	8.78957	3683	8.78965	3977	8.78952	3365	8.78955	3302	8.78967	5132			8.78963	3383	8.78968	2753	8.78963	3159	8.7897	3169	8.78955	3237	8.7897	3291			8.78948	3204	8.7895	3137	8.78943	3199	8.78943	3451	8.78943	3196	8.78972	3494
8.7961	3105	8.79603	3211	8.79612	3757	8.79598	3308	8.79602	3287	8.79613	7624			8.7961	3445	8.79617	3288	8.7961	3295	8.79617	3179	8.79602	3686	8.79617	3309			8.79595	2601	8.79597	3076	8.7959	3407	8.7959	3134	8.7959	3538	8.79618	3131
8.80258	2702	8.8025	3243	8.80258	4441	8.80245	3004	8.80248	3104	8.8026	6808			8.80257	3359	8.80263	3370	8.80257	3665	8.80265	3030	8.80248	3351	8.80265	3142			8.80242	3496	8.80243	3594	8.80238	3106	8.80237	2592	8.80237	3615	8.80265	3517
8.80905	2766	8.80897	3355	8.80905	4259	8.80892	3440	8.80897	3519	8.80907	6097			8.80903	3750	8.8091	3616	8.80903	4065	8.80912	2609	8.80897	3371	8.80912	2972			8.80888	2744	8.80892	3384	8.80885	2741	8.80885	2744	8.80885	3122	8.80912	3513
8.81552	2810	8.81543	3209	8.81552	4081	8.81538	2804	8.81543	3120	8.81553	7171			8.8155	2898	8.81557	2991	8.81552	3188	8.81558	3001	8.81543	3375	8.81558	3255			8.81535	3146	8.81538	2659	8.81532	3186	8.81532	2733	8.81532	3320	8.81558	3604
8.82198	2459	8.8219	3612	8.82198	4034	8.82185	3088	8.8219	3111	8.822	4761			8.82198	3215	8.82203	3307	8.82198	2819	8.82205	3204	8.8219	3257	8.82205	2982			8.82182	2805	8.82185	2855	8.82178	3238	8.82178	3052	8.82178	3763	8.82205	3456
8.82845	2982	8.82838	3166	8.82845	3666	8.82833	2282	8.82837	2839	8.82847	6751			8.82845	3151	8.8285	2888	8.82845	3645	8.82852	2909	8.82837	3155	8.82852	2939			8.82828	2969	8.82832	3153	8.82825	2953	8.82825	2901	8.82825	3988	8.82852	3223
8.83492	3021	8.83485	3479	8.83493	3664	8.8348	3415	8.83483	3343	8.83493	6570			8.83492	3111	8.83497	3293	8.83492	4008	8.83498	3413	8.83483	3241	8.83498	3408			8.83475	3395	8.83478	3695	8.83472	3463	8.83472	3225	8.83472	3489	8.835	3075
8.84138	2726	8.84132	3145	8.8414	4486	8.84127	3443	8.8413	3215	8.8414	6706			8.84138	3113	8.84143	3492	8.84138	4068	8.84145	3018	8.8413	3079	8.84145	3162			8.84123	3128	8.84125	3061	8.84118	3431	8.84118	2724	8.84118	3884	8.84147	3140
8.84785	2920	8.84778	3665	8.84787	4084	8.84773	2771	8.84777	3429	8.84788	7504			8.84785	3269	8.84792	3147	8.84785	3106	8.84792	2932	8.84777	3025	8.84792	3015			8.8477	3668	8.84772	3480	8.84765	3368	8.84765	2772	8.84765	2591	8.84793	2773
8.85432	2948	8.85425	3177	8.85433	4177	8.8542	2964	8.85423	2991	8.85435	4931			8.85432	3018	8.85438	3020	8.85432	3506	8.8544	2974	8.85423	3232	8.8544	3022			8.85417	3253	8.85418	3351	8.85412	3385	8.85412	3119	8.85412	3663	8.8544	3072
8.8608	3222	8.86072	3202	8.8608	3876	8.86067	2927	8.86072	3181	8.86082	6292			8.86078	2972	8.86085	2849	8.86078	3642	8.86087	3010	8.86072	3148	8.86087	3151			8.86063	2736	8.86067	3547	8.8606	2968	8.86058	3161	8.86058	3306	8.86087	3208
8.86727	2626	8.86718	3181	8.86727	3465	8.86713	3309	8.86718	2931	8.86728	6848			8.86725	3449	8.86732	3663	8.86725	3755	8.86733	3548	8.86718	3731	8.86733	3110			8.8671	2864	8.86713	4169	8.86707	3152	8.86707	3137	8.86707	4133	8.86733	2906
8.87373	2782	8.87365	3012	8.87373	3676	8.8736	3084	8.87365	3157	8.87375	4908			8.87372	3456	8.87378	3561	8.87373	3469	8.8738	2968	8.87365	2965	8.8738	3259			8.87357	2903	8.8736	3591	8.87353	2997	8.87353	3024	8.87353	3619	8.8738	3116
8.8802	3195	8.88012	3063	8.8802	3515	8.88008	3402	8.88012	3128	8.88022	7422			8.8802	3352	8.88025	4263	8.8802	3025	8.88027	3596	8.88012	2981	8.88027	3265			8.88003	3279	8.88007	3353	8.88	3319	8.88	3504	8.88	3654	8.88027	3084
8.88667	2885	8.8866	2830	8.88667	3982	8.88655	2476	8.88658	2644	8.88668	5794			8.88667	2746	8.88672	3661	8.88667	3556	8.88673	3790	8.88658	3695	8.88673	3260			8.8865	3377	8.88653	4012	8.88647	3610	8.88647	3376	8.88647	3861	8.88675	3689
8.89313	2723	8.89307	3524	8.89315	3772	8.89302	2731	8.89305	2957	8.89315	6604			8.89313	3621	8.89318	3550	8.89313	3417	8.8932	3385	8.89305	3055	8.8932	2914			8.89297	3406	8.893	3569	8.89293	3570	8.89293	3167	8.89293	3529	8.89322	3265
8.8996	2900	8.89953	3180	8.89962	3538	8.89948	2990	8.89952	3313	8.89963	6891			8.8996	3381	8.89965	3954	8.8996	3825	8.89967	4277	8.89952	3207	8.89967	2906			8.89945	3071	8.89947	3249	8.8994	3062	8.8994	3186	8.8994	2805	8.89968	3976
8.90607	3051	8.906	3169	8.90608	3507	8.90595	2688	8.90598	3532	8.9061	5164			8.90607	2768	8.90613	3168	8.90607	3071	8.90613	3499	8.90598	3086	8.90613	3157			8.90592	3190	8.90593	3767	8.90587	3274	8.90587	3013	8.90587	3993	8.90615	2860
8.91255	2672	8.91247	3305	8.91255	3510	8.91242	2862	8.91245	3592	8.91257	6814			8.91253	3203	8.9126	3112	8.91253	3401	8.91262	3711	8.91245	3194	8.91262	2787			8.91238	2919	8.9124	3754	8.91235	2948	8.91233	3317	8.91233	3518	8.91262	3231
8.91902	3023	8.91893	3229	8.91902	3896	8.91888	2736	8.91893	3151	8.91903	5240			8.919	3215	8.91907	3266	8.919	3661	8.91908	2870	8.91893	3351	8.91908	3276			8.91885	2782	8.91888	3255	8.91882	3383	8.91882	3088	8.91882	3467	8.91908	3421
8.92548	3220	8.9254	3415	8.92548	3601	8.92535	2728	8.9254	2966	8.9255	6566			8.92547	3500	8.92553	2890	8.92548	3359	8.92555	3157	8.9254	3601	8.92555	3466			8.92532	3693	8.92535	3226	8.92528	3237	8.92528	3432	8.92528	4066	8.92555	3083
8.93195	3029	8.93187	3093	8.93195	3302	8.93182	3468	8.93187	3569	8.93197	6656			8.93195	2864	8.932	2913	8.93195	2980	8.93202	2698	8.93187	3232	8.93202	3272			8.93178	3111	8.93182	2963	8.93175	3408	8.93175	3037	8.93175	3231	8.93202	3817
8.93842	2563	8.93835	3163	8.93842	3416	8.9383	3040	8.93833	3199	8.93843	4921			8.93842	3157	8.93847	3185	8.93842	3071	8.93848	3246	8.93833	3888	8.93848	3164			8.93825	3131	8.93828	3324	8.93822	2651	8.93822	3151	8.93822	2946	8.93848	2987
8.94488	2848	8.94482	3531	8.9449	3392	8.94477	3274	8.9448	3284	8.9449	6902			8.94488	3733	8.94493	3226	8.94488	2852	8.94495	3080	8.9448	2951	8.94495	2993			8.94472	2780	8.94475	3210	8.94468	3615	8.94468	3111	8.94468	2993	8.94497	3219
8.95135	2991	8.95128	3524	8.95137	3552	8.95123	2959	8.95127	2709	8.95138	5322			8.95135	3148	8.9514	2974	8.95135	3634	8.95142	2755	8.95127	3393	8.95142	2852			8.9512	3382	8.95122	3082	8.95115	3042	8.95115	2795	8.95115	3692	8.95143	3151
8.95782	3299	8.95775	4067	8.95783	3138	8.9577	2573	8.95773	2251	8.95785	6369			8.95782	3278	8.95788	3677	8.95782	3637	8.95788	3116	8.95773	3348	8.95788	3013			8.95767	2871	8.95768	3512	8.95762	3350	8.95762	2625	8.95762	3258	8.9579	3242
8.96428	2864	8.96422	2959	8.9643	3196	8.96417	3047	8.9642	3206	8.96432	6555			8.96428	3571	8.96435	3499	8.96428	3295	8.96437	2733	8.9642	3078	8.96437	2849			8.96413	3048	8.96415	2792	8.96408	3469	8.96408	2796	8.96408	2600	8.96437	3166
8.97077	2524	8.97068	3735	8.97077	3402	8.97063	2687	8.97068	2706	8.97078	5325			8.97075	3150	8.97082	3525	8.97075	2842	8.97083	3243	8.97068	3450	8.97083	2912			8.9706	2892	8.97063	3540	8.97057	3411	8.97055	2602	8.97055	3418	8.97083	3502
8.97723	2567	8.97715	3682	8.97723	3478	8.9771	2869	8.97715	2688	8.97725	7126			8.97722	3391	8.97728	3285	8.97722	3566	8.9773	3140	8.97715	2549	8.9773	3340			8.97707	2505	8.9771	3143	8.97703	3439	8.97703	2801	8.97703	3475	8.9773	3124
8.9837	2933	8.98362	3682	8.9837	3442	8.98357	3365	8.98362	2760	8.98372	5144			8.9837	3257	8.98375	3384	8.9837	3508	8.98377	2891	8.98362	2431	8.98377	2849			8.98353	3232	8.98357	3528	8.9835	3233	8.9835	3191	8.9835	2916	8.98377	3477
8.99017	2959	8.99008	3352	8.99017	3315	8.99005	2803	8.99008	3340	8.99018	7096			8.99017	3524	8.99022	2999	8.99017	3310	8.99023	3427	8.99008	3327	8.99023	2943			8.99	2752	8.99003	3291	8.98997	3126	8.98997	2909	8.98997	3201	8.99023	2817
8.99663	3051	8.99657	3213	8.99663	3600	8.99652	2723	8.99655	3860	8.99665	7122			8.99663	3027	8.99668	3074	8.99663	3293	8.9967	3654	8.99655	3114	8.9967	2969			8.99647	3233	8.9965	3279	8.99643	3330	8.99643	3091	8.99643	3527	8.99672	3257
9.0031	2892	9.00303	3688	9.00312	3072	9.00298	3509	9.00302	3701	9.00312	5218			9.0031	3287	9.00315	3248	9.0031	3438	9.00317	2928	9.00302	3577	9.00317	2296			9.00293	3015	9.00297	3438	9.0029	3020	9.0029	2272	9.0029	4008	9.00318	3241
9.00957	3179	9.0095	2946	9.00958	4080	9.00945	2476	9.00948	3885	9.0096	7388			9.00957	3297	9.00962	3452	9.00957	3333	9.00963	3237	9.00948	3444	9.00963	2774			9.00942	3121	9.00943	3738	9.00937	3492	9.00937	3182	9.00937	3611	9.00965	2895
9.01603	2803	9.01597	3394	9.01605	3609	9.01592	2995	9.01595	3547	9.01607	5202			9.01603	3906	9.0161	3427	9.01603	2897	9.0161	2957	9.01595	3640	9.01612	3041			9.01588	3014	9.0159	3438	9.01583	3553	9.01583	3102	9.01583	3696	9.01612	3103
9.02252	3134	9.02243	2693	9.02252	3847	9.02238	2627	9.02242	4002	9.02253	6573			9.0225	3421	9.02257	3182	9.0225	3352	9.02258	2422	9.02242	3145	9.02258	3183			9.02235	2789	9.02237	3119	9.02232	2940	9.0223	3131	9.0223	3483	9.02258	3362
9.02898	3251	9.0289	3379	9.02898	3528	9.02885	2723	9.0289	3701	9.029	7290			9.02897	3363	9.02903	3230	9.02897	3603	9.02905	2730	9.0289	3962	9.02905	3181			9.02882	3165	9.02885	3120	9.02878	3580	9.02878	3232	9.02878	3619	9.02905	3587
9.03545	3052	9.03537	3863	9.03545	3501	9.03532	2995	9.03537	4024	9.03547	5109			9.03543	3188	9.0355	3382	9.03545	3176	9.03552	2665	9.03537	3183	9.03552	3379			9.03528	2674	9.03532	3115	9.03525	3170	9.03525	2800	9.03525	3086	9.03552	3577
9.04192	2909	9.04183	3571	9.04192	2790	9.0418	3560	9.04183	3642	9.04193	3412			9.04192	3336	9.04197	3649	9.04192	3280	9.04198	2612	9.04183	3533	9.04198	3230			9.04175	2952	9.04178	3710	9.04172	3125	9.04172	3005	9.04172	3593	9.04198	2824
9.04838	3226	9.04832	4078	9.04838	3236	9.04827	3345	9.0483	3800	9.0484	3116			9.04838	2903	9.04843	3191	9.04838	3587	9.04845	3444	9.0483	3457	9.04845	3130			9.04822	3024	9.04825	3342	9.04818	3278	9.04818	2750	9.04818	2707	9.04845	3449
9.05485	4404	9.05478	3850	9.05487	3598	9.05473	3921	9.05477	3922	9.05487	3642			9.05485	3332	9.0549	3241	9.05485	3012	9.05492	2919	9.05477	3475	9.05492	2750			9.05468	2920	9.05472	3806	9.05465	2956	9.05465	2962	9.05465	4286	9.05493	3121
9.06132	3931	9.06125	4412	9.06133	3644	9.0612	4112	9.06123	3848	9.06135	3419			9.06132	3594	9.06137	3802	9.06132	3166	9.06138	3042	9.06123	3624	9.06138	2781			9.06117	3114	9.06118	3552	9.06112	3535	9.06112	2958	9.06112	3042	9.0614	3487
9.06778	3447	9.06772	3516	9.0678	3757	9.06767	3965	9.0677	4250	9.06782	3198			9.06778	3545	9.06785	4424	9.06778	3355	9.06785	3273	9.0677	3405	9.06785	3319			9.06763	2932	9.06765	4039	9.06758	3658	9.06758	3297	9.06758	3771	9.06787	3420
9.07425	3652	9.07418	4581	9.07427	3458	9.07413	4194	9.07417	3813	9.07428	2986			9.07425	3571	9.07432	3880	9.07425	3851	9.07433	3015	9.07417	4277	9.07433	3210			9.0741	3142	9.07412	3598	9.07407	3009	9.07405	3411	9.07405	4055	9.07433	3086
9.08073	3822	9.08065	3616	9.08073	3254	9.0806	3583	9.08065	4016	9.08075	3156			9.08072	3443	9.08078	3545	9.08072	3722	9.0808	2948	9.08065	3779	9.0808	2995			9.08057	2794	9.0806	3505	9.08053	3096	9.08052	2624	9.08052	3695	9.0808	3419
9.0872	2879	9.08712	3357	9.0872	3062	9.08707	3368	9.08712	3074	9.08722	2623			9.08718	3595	9.08725	3750	9.08718	3000	9.08727	3080	9.08712	3748	9.08727	2808			9.08703	3423	9.08707	3567	9.087	3473	9.087	3151	9.087	3614	9.08727	4010
9.09367	3664	9.09358	3413	9.09367	3207	9.09353	3380	9.09358	3222	9.09368	3168			9.09367	2825	9.09372	3712	9.09367	3256	9.09373	2818	9.09358	4142	9.09373	4141			9.0935	3480	9.09353	3626	9.09347	4146	9.09347	3067	9.09347	4160	9.09373	3525
9.10013	3176	9.10005	3569	9.10013	3496	9.10002	3474	9.10005	3166	9.10015	2942			9.10013	3015	9.10018	3411	9.10013	2978	9.1002	3087	9.10005	3585	9.1002	3087			9.09997	2857	9.1	4224	9.09993	3570	9.09993	3128	9.09993	4589	9.1002	3432
9.1066	2733	9.10653	3570	9.1066	3476	9.10648	3408	9.10652	3054	9.10662	2788			9.1066	3002	9.10665	3210	9.1066	3169	9.10667	3006	9.10652	3562	9.10667	3054			9.10643	3240	9.10647	3375	9.1064	3317	9.1064	3473	9.1064	5547	9.10668	3231
9.11307	2734	9.113	3621	9.11308	3825	9.11295	3386	9.11298	2874	9.11308	3001			9.11307	3365	9.11312	3223	9.11307	3636	9.11313	2842	9.11298	3998	9.11313	3398			9.1129	3011	9.11293	3515	9.11287	3465	9.11287	3275	9.11287	6111	9.11315	3178
9.11953	3068	9.11947	3509	9.11955	3111	9.11942	3071	9.11945	2835	9.11957	3205			9.11953	2978	9.11958	3436	9.11953	3655	9.1196	3015	9.11945	4501	9.1196	3441			9.11938	2969	9.1194	3543	9.11933	3181	9.11933	3280	9.11933	7389	9.11962	3576
9.126	2946	9.12593	2859	9.12602	3496	9.12588	2603	9.12592	3137	9.12603	3264			9.126	3724	9.12607	3349	9.126	3123	9.12607	3117	9.12592	4645	9.12608	3149			9.12585	2661	9.12587	2656	9.1258	3836	9.1258	3083	9.1258	6953	9.12608	3440
9.13248	3162	9.1324	3387	9.13248	2786	9.13235	2991	9.13238	2548	9.1325	2807			9.13247	2711	9.13253	3535	9.13247	3798	9.13255	3555	9.13238	4786	9.13255	2747			9.13232	3352	9.13233	3228	9.13228	2871	9.13227	3754	9.13227	7665	9.13255	3385
9.13895	3093	9.13887	2923	9.13895	3086	9.13882	2900	9.13887	2696	9.13897	2919			9.13893	3481	9.139	3057	9.13893	3469	9.13902	3617	9.13887	4350	9.13902	3316			9.13878	3075	9.13882	3551	9.13875	3606	9.13875	3815	9.13875	6809	9.13902	4036
9.14542	2969	9.14533	3320	9.14542	4305	9.14528	3282	9.14533	2888	9.14543	2479			9.1454	3627	9.14547	3483	9.14542	3707	9.14548	3134	9.14533	4029	9.14548	3114			9.14525	3444	9.14528	3396	9.14522	3672	9.14522	3608	9.14522	5574	9.14548	3541
9.15188	2716	9.1518	4501	9.15188	6481	9.15177	3849	9.1518	4106	9.1519	4370			9.15188	3473	9.15193	4609	9.15188	4196	9.15195	3407	9.1518	5440	9.15195	3568			9.15172	2922	9.15175	3530	9.15168	4144	9.15168	3705	9.15168	5614	9.15195	3597
9.15835	3253	9.15828	7588	9.15835	15107	9.15823	6218	9.15827	6587	9.15837	6168			9.15835	5145	9.1584	7717	9.15835	6334	9.15842	3982	9.15827	8165	9.15842	6393			9.15818	3840	9.15822	3296	9.15815	4013	9.15815	3342	9.15815	5414	9.15843	3261
9.16482	5906	9.16475	15017	9.16483	35664	9.1647	14102	9.16473	16218	9.16483	16420			9.16482	6499	9.16487	14212	9.16482	13448	9.16488	5696	9.16473	16134	9.16488	11707			9.16465	3496	9.16468	4100	9.16462	4708	9.16462	3507	9.16462	5989	9.1649	4620
9.17128	11439	9.17122	37816	9.1713	87630	9.17117	36069	9.1712	40081	9.17132	37237			9.17128	11601	9.17133	31789	9.17128	30283	9.17135	11297	9.1712	38079	9.17135	25956			9.17113	3162	9.17115	6106	9.17108	7533	9.17108	4159	9.17108	8474	9.17137	7372
9.17775	23875	9.17768	81754	9.17777	206128	9.17763	89484	9.17767	89093	9.17778	87018			9.17775	22870	9.17782	70028	9.17775	67109	9.17782	22078	9.17767	81151	9.17782	56819			9.1776	3949	9.17762	8078	9.17755	13622	9.17755	7075	9.17755	14442	9.17783	12196
9.18422	48228	9.18415	168606	9.18423	419900	9.1841	184630	9.18413	191834	9.18425	178307			9.18422	42621	9.18428	138084	9.18422	139625	9.1843	41906	9.18413	165230	9.1843	112481			9.18407	4168	9.18408	16625	9.18403	24553	9.18402	11973	9.18402	27503	9.1843	22788
9.1907	87233	9.19062	306468	9.1907	760440	9.19057	351623	9.19062	357581	9.19072	327810			9.19068	78144	9.19075	254888	9.19068	252256	9.19077	74286	9.19062	305338	9.19077	199522			9.19053	6410	9.19057	26337	9.1905	46695	9.19048	19573	9.19048	48833	9.19077	41193
9.19717	141721	9.19708	479965	9.19717	1187063	9.19703	564848	9.19708	571909	9.19718	525107			9.19715	124585	9.19722	407441	9.19715	410051	9.19723	124001	9.19708	509046	9.19723	323384			9.197	8514	9.19703	42007	9.19697	73565	9.19697	30121	9.19697	75376	9.19723	65271
9.20363	194308	9.20355	656093	9.20363	1628349	9.2035	797892	9.20355	818624	9.20365	725155			9.20363	178889	9.20368	569465	9.20363	582480	9.2037	174868	9.20355	729137	9.2037	444071			9.20347	11295	9.2035	57962	9.20343	112937	9.20343	45958	9.20343	110775	9.2037	90290
9.2101	244539	9.21003	793941	9.2101	1981625	9.20998	1012980	9.21002	994239	9.21012	876042			9.2101	220189	9.21015	680701	9.2101	723077	9.21017	222363	9.21002	891671	9.21017	523715			9.20993	15176	9.20997	75052	9.2099	148994	9.2099	57111	9.2099	137307	9.21017	120502
9.21657	265533	9.2165	819134	9.21657	2142162	9.21645	1097322	9.21648	1067186	9.21658	907636			9.21657	247402	9.21662	734811	9.21657	776312	9.21663	248056	9.21648	983214	9.21663	549966			9.2164	17109	9.21643	83630	9.21637	173829	9.21637	66620	9.21637	156582	9.21665	137741
9.22303	251679	9.22297	758683	9.22305	2024338	9.22292	1049838	9.22295	1020270	9.22305	856385			9.22303	258267	9.22308	715696	9.22303	749011	9.2231	250377	9.22295	943824	9.2231	517390			9.22288	20874	9.2229	86492	9.22283	183830	9.22283	70250	9.22283	154896	9.22312	141511
9.2295	218132	9.22943	620908	9.22952	1683354	9.22938	865792	9.22942	852197	9.22953	701139			9.2295	261275	9.22955	658141	9.2295	642512	9.22957	251120	9.22942	805796	9.22957	427101			9.22935	24597	9.22937	94284	9.2293	176591	9.2293	73388	9.2293	141778	9.22958	132860
9.23597	174376	9.2359	460427	9.23598	1236658	9.23585	644498	9.23588	637752	9.236	513989			9.23597	264823	9.23603	604416	9.23597	530027	9.23603	258247	9.23588	634856	9.23605	351843			9.23582	31080	9.23583	102670	9.23577	172051	9.23577	77332	9.23577	122785	9.23605	133133
9.24245	134143	9.24237	323609	9.24245	803844	9.24232	429355	9.24235	435544	9.24247	344424			9.24243	313848	9.2425	617753	9.24243	448309	9.24252	295372	9.24235	499687	9.24252	286541			9.24228	41294	9.2423	124651	9.24225	173330	9.24223	88011	9.24223	112233	9.24252	134069
9.24892	105174	9.24883	220078	9.24892	483072	9.24878	275858	9.24883	280281	9.24893	213392			9.2489	408352	9.24897	697879	9.2489	407171	9.24898	378525	9.24883	401634	9.24898	257113			9.24875	62372	9.24878	163216	9.24872	202331	9.24872	110456	9.24872	108436	9.24898	156663
9.25538	97171	9.2553	163984	9.25538	281328	9.25525	172885	9.2553	174183	9.2554	132201			9.25537	516537	9.25543	842260	9.25538	432715	9.25545	491172	9.2553	380687	9.25545	264828			9.25522	86627	9.25525	202658	9.25518	250788	9.25518	146969	9.25518	118608	9.25545	193619
9.26185	95012	9.26177	132216	9.26185	172089	9.26173	118368	9.26177	113655	9.26187	83074			9.26185	623314	9.2619	953141	9.26185	474952	9.26192	593867	9.26177	395679	9.26192	289106			9.26168	115154	9.26172	248715	9.26165	302541	9.26165	187581	9.26165	141902	9.26192	225104
9.26832	96715	9.26825	117368	9.26832	119538	9.2682	91185	9.26823	83262	9.26833	63436			9.26832	663587	9.26837	995671	9.26832	488498	9.26838	646865	9.26823	415747	9.26838	298343			9.26815	135529	9.26818	275902	9.26812	340445	9.26812	213574	9.26812	157072	9.2684	247999
9.27478	86931	9.27472	104001	9.2748	92623	9.27467	73398	9.2747	66311	9.2748	52289			9.27478	643573	9.27483	947473	9.27478	479546	9.27485	636077	9.2747	405980	9.27485	288723			9.27462	144872	9.27465	272664	9.27458	349754	9.27458	220816	9.27458	163060	9.27487	241630
9.28125	77284	9.28118	89459	9.28127	72546	9.28113	59806	9.28117	56764	9.28128	41824			9.28125	568532	9.2813	799496	9.28125	422222	9.28132	557879	9.28117	365226	9.28132	248939			9.2811	141762	9.28112	248552	9.28105	316717	9.28105	207053	9.28105	151091	9.28133	217080
9.28772	61860	9.28765	73536	9.28773	59437	9.2876	52174	9.28763	46468	9.28775	33368			9.28772	446023	9.28778	607946	9.28772	334605	9.28778	443875	9.28763	305589	9.28778	195544			9.28757	120771	9.28758	200209	9.28752	261074	9.28752	171049	9.28752	134295	9.2878	181096
9.2942	45637	9.29412	51922	9.2942	46068	9.29407	38376	9.2941	37604	9.29422	29676			9.29418	313212	9.29425	422440	9.29418	242077	9.29427	316347	9.2941	230229	9.29427	140964			9.29403	98583	9.29405	146418	9.294	196192	9.29398	136108	9.29398	112880	9.29427	134571
9.30067	32052	9.30058	37423	9.30067	36115	9.30053	28933	9.30058	28608	9.30068	23860			9.30065	205647	9.30072	269024	9.30065	158215	9.30073	212543	9.30058	161901	9.30073	94764			9.3005	70105	9.30053	101259	9.30047	133342	9.30045	96133	9.30045	94144	9.30073	93024
9.30713	20287	9.30705	27297	9.30713	26521	9.307	20286	9.30705	23151	9.30715	19405			9.30712	127079	9.30718	154382	9.30712	93014	9.3072	129311	9.30705	115978	9.3072	58822			9.30697	47612	9.307	62804	9.30693	85028	9.30693	66352	9.30693	76665	9.3072	60067
9.3136	13568	9.31352	17383	9.3136	22209	9.31347	15547	9.31352	19332	9.31362	16329			9.3136	69036	9.31365	85373	9.3136	56514	9.31367	76173	9.31352	83737	9.31367	34536			9.31343	31385	9.31347	41329	9.3134	51347	9.3134	46361	9.3134	72714	9.31367	37183
9.32007	8952	9.32	12717	9.32007	18052	9.31995	12096	9.31998	14626	9.32008	13809			9.32007	39093	9.32012	46872	9.32007	29506	9.32013	42883	9.31998	64384	9.32013	20404			9.3199	20599	9.31993	26748	9.31987	32650	9.31987	39152	9.31987	74221	9.32013	25444
9.32653	6633	9.32647	11088	9.32653	15514	9.32642	10014	9.32645	14884	9.32655	14821			9.32653	21278	9.32658	24375	9.32653	18351	9.3266	26813	9.32645	54065	9.3266	13395			9.32637	15138	9.3264	17659	9.32633	20665	9.32633	35938	9.32633	74692	9.32662	18666
9.333	5996	9.33293	9779	9.33302	13112	9.33288	9361	9.33292	12502	9.33302	11167			9.333	15486	9.33305	15735	9.333	12564	9.33307	18359	9.33292	48044	9.33307	8333			9.33285	11183	9.33287	16269	9.3328	16308	9.3328	35950	9.3328	71153	9.33308	15833
9.33947	5582	9.3394	8433	9.33948	12933	9.33935	7289	9.33938	11359	9.3395	11303			9.33947	10551	9.33952	11419	9.33947	9901	9.33953	13914	9.33938	43934	9.33953	6351			9.33932	9507	9.33933	13271	9.33927	12964	9.33927	34810	9.33927	66763	9.33955	14604
9.34593	4993	9.34587	7970	9.34595	11800	9.34582	7286	9.34585	10784	9.34597	12542			9.34593	8492	9.346	9400	9.34593	7864	9.346	12096	9.34585	39413	9.34602	6087			9.34578	8802	9.3458	12678	9.34573	11866	9.34573	29634	9.34573	57829	9.34602	12303
9.35242	4976	9.35233	8329	9.35242	11254	9.35228	6777	9.35232	11080	9.35243	8822			9.3524	8511	9.35247	9124	9.3524	7685	9.35248	11828	9.35232	32974	9.35248	5435			9.35225	8361	9.35227	12214	9.35222	12110	9.3522	28506	9.3522	49380	9.35248	12355
9.35888	4454	9.3588	7259	9.35888	10970	9.35875	6883	9.3588	9205	9.3589	10901			9.35887	8239	9.35893	9470	9.35887	8173	9.35895	10995	9.3588	27875	9.35895	5637			9.35872	7518	9.35875	9921	9.35868	11166	9.35868	22521	9.35868	38145	9.35895	11420
9.36535	4823	9.36527	7497	9.36535	9674	9.36522	6620	9.36527	9494	9.36537	11197			9.36533	6529	9.3654	8891	9.36535	8842	9.36542	10263	9.36527	23837	9.36542	4787			9.36518	7706	9.36522	10259	9.36515	9798	9.36515	19060	9.36515	30070	9.36542	10034
9.37182	3911	9.37173	6601	9.37182	9319	9.3717	6705	9.37173	9264	9.37183	8695			9.37182	6806	9.37187	10430	9.37182	8174	9.37188	8663	9.37173	19473	9.37188	4756			9.37165	6673	9.37168	8792	9.37162	8708	9.37162	15408	9.37162	23870	9.37188	7960
9.37828	4351	9.37822	7489	9.37828	8948	9.37817	5713	9.3782	8906	9.3783	11414			9.37828	5963	9.37833	9041	9.37828	7633	9.37835	8659	9.3782	16455	9.37835	5387			9.37812	5633	9.37815	7495	9.37808	8332	9.37808	12441	9.37808	18597	9.37837	6886
9.38475	3972	9.38468	6942	9.38477	9003	9.38463	5954	9.38467	7464	9.38477	8556			9.38475	5156	9.3848	9930	9.38475	8708	9.38482	6972	9.38467	14292	9.38482	5193			9.38458	5838	9.38462	5841	9.38455	7421	9.38455	11013	9.38455	16886	9.38483	7025
9.39122	3951	9.39115	6206	9.39123	8981	9.3911	6099	9.39113	7155	9.39125	9755			9.39122	5075	9.39127	9720	9.39122	8259	9.39128	5961	9.39113	12579	9.39128	5172			9.39107	5830	9.39108	5879	9.39102	6454	9.39102	9398	9.39102	12315	9.3913	4963
9.39768	4130	9.39762	6990	9.3977	8436	9.39757	5875	9.3976	7803	9.39772	9784			9.39768	5145	9.39775	8506	9.39768	6818	9.39775	6570	9.3976	10359	9.39775	4358			9.39753	3882	9.39755	5487	9.39748	5983	9.39748	8727	9.39748	10659	9.39777	6054
9.40417	4384	9.40408	6693	9.40417	7372	9.40403	5735	9.40407	6382	9.40418	7195			9.40415	4621	9.40422	7281	9.40415	6803	9.40423	6090	9.40407	10537	9.40423	4880			9.404	4429	9.40402	5692	9.40397	5287	9.40395	6511	9.40395	10490	9.40423	4445
9.41063	4554	9.41055	6078	9.41063	7937	9.4105	5455	9.41055	6905	9.41065	9347			9.41062	3994	9.41068	6909	9.41062	5493	9.4107	6103	9.41055	9238	9.4107	3709			9.41047	3975	9.4105	4269	9.41043	5360	9.41042	5533	9.41042	8413	9.4107	5270
9.4171	3830	9.41702	5698	9.4171	7289	9.41697	4993	9.41702	6388	9.41712	8332			9.41708	4374	9.41715	7555	9.4171	5115	9.41717	5281	9.41702	8458	9.41717	4164			9.41693	3592	9.41697	4669	9.4169	4989	9.4169	6147	9.4169	7901	9.41717	5578
9.42357	4071	9.42348	5593	9.42357	7289	9.42343	5077	9.42348	5848	9.42358	8679			9.42357	3875	9.42362	6977	9.42357	6493	9.42363	5671	9.42348	8111	9.42363	3908			9.4234	3925	9.42343	4247	9.42337	4793	9.42337	6389	9.42337	8019	9.42363	5193
9.43003	4273	9.42997	5299	9.43003	7347	9.42992	4757	9.42995	6026	9.43005	8842			9.43003	4775	9.43008	8736	9.43003	7366	9.4301	4498	9.42995	7486	9.4301	4260			9.42987	3572	9.4299	4079	9.42983	5264	9.42983	5530	9.42983	6781	9.4301	5079
9.4365	3828	9.43643	5921	9.4365	6768	9.43638	4943	9.43642	6213	9.43652	6248			9.4365	4454	9.43655	10411	9.4365	8915	9.43657	5992	9.43642	7945	9.43657	3449			9.43633	4151	9.43637	4537	9.4363	5060	9.4363	5509	9.4363	7075	9.43658	4237
9.44297	3249	9.4429	5163	9.44298	6842	9.44285	4933	9.44288	5398	9.44298	9458			9.44297	4914	9.44302	12804	9.44297	9856	9.44303	5593	9.44288	8345	9.44303	4126			9.44282	3808	9.44283	4468	9.44277	5023	9.44277	5237	9.44277	7222	9.44305	4024
9.44943	3558	9.44937	5843	9.44945	6775	9.44932	4662	9.44935	5408	9.44947	8413			9.44943	4551	9.44948	15003	9.44943	11652	9.4495	5045	9.44935	8801	9.4495	4190			9.44928	3303	9.4493	3818	9.44923	5467	9.44923	5294	9.44923	7383	9.44952	4140
9.4559	3437	9.45583	5095	9.45592	7616	9.45578	4728	9.45582	6092	9.45593	7819			9.4559	5135	9.45597	16226	9.4559	11338	9.45597	5204	9.45582	10258	9.45598	4465			9.45575	3360	9.45577	3823	9.4557	4227	9.4557	5266	9.4557	6284	9.45598	4216
9.46238	3314	9.4623	4857	9.46238	5518	9.46225	4268	9.46228	5385	9.4624	8829			9.46237	4623	9.46243	17440	9.46237	13784	9.46245	5126	9.46228	10847	9.46245	3671			9.46222	3033	9.46225	3930	9.46218	4825	9.46217	5677	9.46217	7212	9.46245	4337
9.46885	3770	9.46877	4558	9.46885	5625	9.46872	5149	9.46877	5962	9.46887	6012			9.46883	5660	9.4689	16124	9.46883	12351	9.46892	5054	9.46877	8995	9.46892	4155			9.46868	3240	9.46872	4236	9.46865	3473	9.46865	4688	9.46865	5537	9.46892	3841
9.47532	4105	9.47523	5039	9.47532	5396	9.47518	4530	9.47523	4955	9.47533	8072			9.4753	5564	9.47537	13867	9.47532	10827	9.47538	4866	9.47523	9820	9.47538	3827			9.47515	3582	9.47518	3508	9.47512	4284	9.47512	5064	9.47512	6241	9.47538	3614
9.48178	4044	9.4817	4726	9.48178	5868	9.48167	4340	9.4817	4961	9.4818	8077			9.48178	5460	9.48183	11948	9.48178	8814	9.48185	4906	9.4817	8654	9.48185	4210			9.48162	3783	9.48165	4277	9.48158	2970	9.48158	4997	9.48158	5587	9.48185	3864
9.48825	3471	9.48818	4910	9.48825	5908	9.48813	4507	9.48817	5035	9.48827	6799			9.48825	3864	9.4883	10059	9.48825	8673	9.48832	4922	9.48817	6568	9.48832	3700			9.48808	3104	9.48812	3659	9.48805	3695	9.48805	4157	9.48805	4986	9.48833	3496
9.49472	3629	9.49465	4411	9.49473	6331	9.4946	4614	9.49463	4909	9.49473	8621			9.49472	3873	9.49477	8418	9.49472	6319	9.49478	4011	9.49463	6694	9.49478	3746			9.49455	2829	9.49458	4449	9.49452	4125	9.49452	4303	9.49452	5358	9.4948	3231
9.50118	2733	9.50112	4904	9.5012	5713	9.50107	4182	9.5011	5003	9.50122	6759			9.50118	4717	9.50123	6619	9.50118	5779	9.50125	3563	9.5011	5999	9.50125	4537			9.50103	2984	9.50105	3651	9.50098	4090	9.50098	4353	9.50098	5461	9.50127	3248
9.50765	3390	9.50758	4268	9.50767	5772	9.50753	3686	9.50757	5435	9.50768	8081			9.50765	3877	9.50772	6072	9.50765	4717	9.50772	3851	9.50757	5628	9.50772	3908			9.5075	2901	9.50752	3610	9.50745	4189	9.50745	3841	9.50745	4671	9.50773	3478
9.51413	3509	9.51405	4353	9.51413	4848	9.514	3980	9.51403	5068	9.51415	8094			9.51412	3605	9.51418	5555	9.51412	4478	9.5142	4096	9.51403	5357	9.5142	3410			9.51397	2769	9.51398	3747	9.51393	3574	9.51392	3707	9.51392	4938	9.5142	3676
9.5206	3596	9.52052	5072	9.5206	5759	9.52047	3867	9.52052	4836	9.52062	6972			9.52058	4345	9.52065	5223	9.52058	4369	9.52067	4050	9.52052	5404	9.52067	3541			9.52043	3146	9.52047	3945	9.5204	3626	9.5204	3695	9.5204	5889	9.52067	3895
9.52707	4022	9.52698	5277	9.52707	5610	9.52693	3452	9.52698	6515	9.52708	8548			9.52705	3653	9.52712	4571	9.52707	4747	9.52713	3170	9.52698	5856	9.52713	3390			9.5269	3564	9.52693	3584	9.52687	3560	9.52687	4036	9.52687	4662	9.52713	3670
9.53353	4608	9.53345	5648	9.53353	5536	9.5334	3906	9.53345	8688	9.53355	6331			9.53353	4224	9.53358	5104	9.53353	3579	9.5336	3542	9.53345	7450	9.5336	3304			9.53337	3172	9.5334	4386	9.53333	3246	9.53333	4438	9.53333	6906	9.5336	4119
9.54	8007	9.53993	5873	9.54	5339	9.53988	4382	9.53992	10546	9.54002	8493			9.54	5714	9.54005	5368	9.54	3726	9.54007	3229	9.53992	7678	9.54007	3890			9.53983	3414	9.53987	4941	9.5398	3831	9.5398	4187	9.5398	7380	9.54007	4435
9.54647	7628	9.5464	6488	9.54648	4845	9.54635	4381	9.54638	13666	9.54648	9336			9.54647	6889	9.54652	4872	9.54647	4668	9.54653	3083	9.54638	8989	9.54653	3808			9.5463	4224	9.54633	5597	9.54627	3431	9.54627	4020	9.54627	8984	9.54655	7421
9.55293	9827	9.55287	8090	9.55295	5557	9.55282	4772	9.55285	17487	9.55295	8431			9.55293	7523	9.55298	5789	9.55293	4689	9.553	3467	9.55285	11336	9.553	3863			9.55278	4642	9.5528	6211	9.55273	3541	9.55273	3858	9.55273	12587	9.55302	11108
9.5594	10613	9.55933	8633	9.55942	5493	9.55928	5037	9.55932	18422	9.55943	10239			9.5594	8290	9.55947	6802	9.5594	4357	9.55947	3954	9.55932	12246	9.55947	3957			9.55925	5459	9.55927	6714	9.5592	3282	9.5592	4654	9.5592	13769	9.55948	18252
9.56587	10667	9.5658	7643	9.56588	4717	9.56575	4506	9.56578	18376	9.5659	7766			9.56587	7940	9.56593	7221	9.56587	3897	9.56595	3449	9.56578	12407	9.56595	4427			9.56572	5271	9.56573	6283	9.56567	3703	9.56567	4507	9.56567	16645	9.56595	26471
9.57235	10297	9.57227	7582	9.57235	5494	9.57222	3813	9.57227	16915	9.57237	7901			9.57233	7538	9.5724	7299	9.57233	4045	9.57242	3539	9.57227	13190	9.57242	4798			9.57218	5743	9.57222	6243	9.57215	3370	9.57213	4351	9.57213	17233	9.57242	31780
9.57882	8580	9.57873	7315	9.57882	5396	9.57868	4191	9.57873	13887	9.57883	8174			9.5788	7497	9.57887	6017	9.5788	4000	9.57888	4117	9.57873	11892	9.57888	5578			9.57865	5379	9.57868	6407	9.57862	3510	9.57862	5420	9.57862	18805	9.57888	35171
9.58528	6960	9.5852	5589	9.58528	4325	9.58515	3704	9.5852	10479	9.5853	7379			9.58528	6418	9.58533	5921	9.58528	3787	9.58535	4522	9.5852	10556	9.58535	5462			9.58512	4377	9.58515	5817	9.58508	3481	9.58508	6804	9.58508	18472	9.58535	37435
9.59175	4959	9.59167	5335	9.59175	5366	9.59163	3417	9.59167	8152	9.59177	7427			9.59175	6066	9.5918	5283	9.59175	4137	9.59182	4124	9.59167	9624	9.59182	6294			9.59158	3567	9.59162	6223	9.59155	3436	9.59155	6830	9.59155	16956	9.59182	33690
9.59822	4590	9.59815	4115	9.59822	5253	9.5981	3056	9.59813	6798	9.59823	5101			9.59822	5517	9.59827	6758	9.59822	3990	9.59828	4503	9.59813	7617	9.59828	5610			9.59805	3752	9.59808	4847	9.59802	3731	9.59802	6834	9.59802	14384	9.5983	29495
9.60468	3849	9.60462	4910	9.6047	4177	9.60457	3750	9.6046	5751	9.6047	7436			9.60468	5206	9.60473	4661	9.60468	4295	9.60475	3874	9.6046	6797	9.60475	4687			9.60452	4590	9.60455	5075	9.60448	3580	9.60448	5906	9.60448	11836	9.60477	23349
9.61115	3221	9.61108	4136	9.61117	4856	9.61103	3877	9.61107	5203	9.61118	7918			9.61115	4166	9.6112	4566	9.61115	4328	9.61122	3730	9.61107	6404	9.61122	4121			9.611	4388	9.61102	4472	9.61095	3899	9.61095	5643	9.61095	10692	9.61123	18171
9.61762	3651	9.61755	4347	9.61763	4616	9.6175	3283	9.61753	4699	9.61765	6469			9.61762	4466	9.61768	4427	9.61762	4037	9.61768	4228	9.61753	5434	9.6177	5482			9.61747	4882	9.61748	4212	9.61742	3761	9.61742	5740	9.61742	9628	9.6177	15139
9.6241	3767	9.62402	4839	9.6241	5493	9.62397	4815	9.624	4855	9.62412	8287			9.62408	4647	9.62415	4615	9.62408	4148	9.62417	4291	9.624	6186	9.62417	4706			9.62393	5667	9.62395	3751	9.6239	3352	9.62388	6618	9.62388	10624	9.62417	12685
9.63057	4321	9.63048	5326	9.63057	4340	9.63043	5263	9.63048	5475	9.63058	8006			9.63055	4840	9.63062	5334	9.63055	4541	9.63063	6120	9.63048	7277	9.63063	5285			9.6304	7374	9.63043	4774	9.63037	4786	9.63037	8728	9.63037	10969	9.63063	11333
9.63703	5397	9.63695	5813	9.63703	5734	9.6369	7189	9.63695	4866	9.63705	6221			9.63702	5397	9.63708	5222	9.63703	4774	9.6371	7005	9.63695	8353	9.6371	5890			9.63687	10545	9.6369	6382	9.63683	4717	9.63683	9336	9.63683	11195	9.6371	10864
9.6435	5692	9.64342	6187	9.6435	6993	9.64337	8712	9.64342	6594	9.64352	6855			9.6435	5772	9.64355	6048	9.6435	5334	9.64357	8561	9.64342	10098	9.64357	5433			9.64333	12790	9.64337	6360	9.6433	5259	9.6433	12655	9.6433	14323	9.64357	12094
9.64997	6762	9.6499	6594	9.64997	7446	9.64985	10000	9.64988	6806	9.64998	7405			9.64997	6730	9.65002	6659	9.64997	5398	9.65003	11748	9.64988	10970	9.65003	7146			9.6498	13792	9.64983	5898	9.64977	4719	9.64977	13889	9.64977	14853	9.65003	11802
9.65643	6476	9.65637	6770	9.65645	7547	9.65632	12383	9.65635	8196	9.65645	7732			9.65643	6450	9.65648	7754	9.65643	5708	9.6565	11669	9.65635	12579	9.6565	8066			9.65627	12059	9.6563	7474	9.65623	6922	9.65623	15166	9.65623	15756	9.65652	12020
9.6629	6843	9.66283	8215	9.66292	10993	9.66278	11777	9.66282	8560	9.66293	8241			9.6629	6653	9.66295	9141	9.6629	7737	9.66297	11310	9.66282	11951	9.66297	8020			9.66275	13428	9.66277	8016	9.6627	6570	9.6627	14653	9.6627	13599	9.66298	10472
9.66937	7136	9.6693	8034	9.66938	11252	9.66925	11975	9.66928	8579	9.6694	9234			9.66937	6291	9.66943	9424	9.66937	8594	9.66943	11648	9.66928	13724	9.66943	8055			9.66922	11121	9.66923	7585	9.66917	7097	9.66917	13768	9.66917	13383	9.66945	10840
9.67583	6879	9.67577	10190	9.67585	16003	9.67572	14881	9.67575	10419	9.67587	10383			9.67583	6933	9.6759	11170	9.67583	10443	9.67592	11746	9.67575	13991	9.67592	9469			9.67568	9149	9.6757	7253	9.67565	9715	9.67563	13462	9.67563	12037	9.67592	11523
9.68232	7074	9.68223	12581	9.68232	20363	9.68218	16075	9.68223	13336	9.68233	11572			9.6823	7243	9.68237	13175	9.6823	12496	9.68238	12908	9.68223	16298	9.68238	11849			9.68215	7615	9.68218	9059	9.68212	11083	9.6821	12971	9.6821	11775	9.68238	13221
9.68878	7794	9.6887	13147	9.68878	24946	9.68865	18864	9.6887	15232	9.6888	14049			9.68877	8138	9.68883	16149	9.68877	13372	9.68885	12884	9.6887	20463	9.68885	11773			9.68862	7335	9.68865	10077	9.68858	13541	9.68858	12870	9.68858	15634	9.68885	13826
9.69525	8379	9.69517	15377	9.69525	30427	9.69512	21743	9.69517	18460	9.69527	15260			9.69525	8152	9.6953	19283	9.69525	16985	9.69532	12789	9.69517	23992	9.69532	14448			9.69508	6434	9.69512	10280	9.69505	15916	9.69505	13244	9.69505	15795	9.69532	15135
9.70172	8180	9.70163	17623	9.70172	32254	9.7016	23649	9.70163	20034	9.70173	17287			9.70172	9020	9.70177	21430	9.70172	18263	9.70178	14369	9.70163	26720	9.70178	16252			9.70155	6053	9.70158	11866	9.70152	17319	9.70152	14027	9.70152	17299	9.70178	16495
9.70818	9099	9.70812	16759	9.70818	32241	9.70807	25043	9.7081	21245	9.7082	16363			9.70818	9138	9.70823	18828	9.70818	18076	9.70825	13418	9.7081	27179	9.70825	14697			9.70802	5900	9.70805	12588	9.70798	19062	9.70798	12876	9.70798	17481	9.70827	18067
9.71465	8321	9.71458	15644	9.71467	30370	9.71453	23493	9.71457	20026	9.71467	16107			9.71465	8513	9.7147	19957	9.71465	16900	9.71472	12289	9.71457	25817	9.71472	15579			9.71448	5233	9.71452	11780	9.71445	18611	9.71445	11782	9.71445	17220	9.71473	16812
9.72112	7654	9.72105	13805	9.72113	26359	9.721	20313	9.72103	16630	9.72115	13903			9.72112	8762	9.72117	15882	9.72112	15010	9.72118	10734	9.72103	23101	9.72118	12261			9.72097	6027	9.72098	10243	9.72092	16952	9.72092	10791	9.72092	15995	9.7212	14982
9.72758	7023	9.72752	11006	9.7276	20902	9.72747	16558	9.7275	14303	9.72762	11167			9.72758	6992	9.72765	14116	9.72758	13364	9.72765	9401	9.7275	19362	9.72767	10468			9.72743	5347	9.72745	9720	9.72738	12985	9.72738	10500	9.72738	12822	9.72767	12723
9.73407	5931	9.73398	9468	9.73407	16227	9.73393	13678	9.73397	10854	9.73408	8654			9.73405	6102	9.73412	10607	9.73405	9446	9.73413	8464	9.73397	14660	9.73413	8569			9.7339	5810	9.73392	8284	9.73387	11541	9.73385	8822	9.73385	11151	9.73413	10518
9.74053	4640	9.74045	7485	9.74053	10934	9.7404	10438	9.74045	8878	9.74055	7421			9.74052	5941	9.74058	8460	9.74052	8896	9.7406	7846	9.74045	11175	9.7406	6862			9.74037	4205	9.7404	7284	9.74033	8152	9.74033	7352	9.74033	10803	9.7406	9330
9.747	4080	9.74692	5952	9.747	9252	9.74687	8247	9.74692	6351	9.74702	5908			9.74698	5031	9.74705	7155	9.747	6984	9.74707	6369	9.74692	9669	9.74707	5406			9.74683	4192	9.74687	6681	9.7468	7254	9.7468	7308	9.7468	8518	9.74707	7895
9.75347	4545	9.75338	5240	9.75347	7251	9.75335	7062	9.75338	5554	9.75348	4900			9.75347	4550	9.75352	5720	9.75347	5826	9.75353	5842	9.75338	7658	9.75353	4310			9.7533	4334	9.75333	6037	9.75327	6404	9.75327	6495	9.75327	6733	9.75353	6900
9.75993	3749	9.75987	5252	9.75993	6269	9.75982	6183	9.75985	5374	9.75995	3884			9.75993	4609	9.75998	4799	9.75993	5159	9.76	5249	9.75985	5484	9.76	4996			9.75977	4275	9.7598	5265	9.75973	5540	9.75973	6481	9.75973	7120	9.76002	4876
9.7664	3869	9.76633	4690	9.76642	5934	9.76628	5520	9.76632	4680	9.76642	4751			9.7664	3857	9.76645	4776	9.7664	4959	9.76647	5690	9.76632	5658	9.76647	4562			9.76623	4105	9.76627	4701	9.7662	4712	9.7662	4988	9.7662	4527	9.76648	4758
9.77287	4511	9.7728	4632	9.77288	5273	9.77275	5070	9.77278	3856	9.7729	4167			9.77287	4625	9.77292	5196	9.77287	5427	9.77293	4987	9.77278	5808	9.77293	4588			9.77272	3695	9.77273	4577	9.77267	4478	9.77267	5043	9.77267	5351	9.77295	4868
9.77933	3408	9.77927	4946	9.77935	4930	9.77922	4723	9.77925	4282	9.77937	4167			9.77933	3661	9.7794	4504	9.77933	4470	9.7794	5384	9.77925	4574	9.7794	4729			9.77918	3901	9.7792	4165	9.77913	4274	9.77913	5189	9.77913	4951	9.77942	4267
9.7858	3732	9.78573	4440	9.78582	5058	9.78568	5041	9.78572	4230	9.78583	4620			9.7858	3785	9.78587	5068	9.7858	3834	9.78588	5420	9.78572	4421	9.78588	4141			9.78565	4266	9.78567	4312	9.78562	5063	9.7856	4477	9.7856	4433	9.78588	4568
9.79228	3272	9.7922	4777	9.79228	5148	9.79215	5068	9.7922	4320	9.7923	4010			9.79227	4387	9.79233	4042	9.79227	3977	9.79235	5177	9.7922	4686	9.79235	4430			9.79212	3446	9.79215	4105	9.79208	4357	9.79207	4521	9.79207	5083	9.79235	4252
9.79875	3946	9.79867	4815	9.79875	4707	9.79862	4657	9.79867	4838	9.79877	4409			9.79873	4433	9.7988	5246	9.79873	4837	9.79882	4672	9.79867	4625	9.79882	4893			9.79858	4017	9.79862	5093	9.79855	4180	9.79855	5066	9.79855	4097	9.79882	3555
9.80522	4688	9.80513	4816	9.80522	5102	9.80508	4079	9.80513	4698	9.80523	4247			9.80522	4173	9.80527	4819	9.80522	3993	9.80528	4776	9.80513	5023	9.80528	4212			9.80505	3592	9.80508	4596	9.80502	4490	9.80502	5062	9.80502	4705	9.80528	4354
9.81168	3940	9.81162	4229	9.81168	5572	9.81157	5343	9.8116	4057	9.8117	3692			9.81168	4246	9.81173	4164	9.81168	4050	9.81175	4456	9.8116	4419	9.81175	4441			9.81152	3679	9.81155	4754	9.81148	3626	9.81148	4631	9.81148	4034	9.81175	4194
9.81815	3706	9.81808	4221	9.81815	4681	9.81803	4779	9.81807	4426	9.81817	3861			9.81815	4116	9.8182	4694	9.81815	3845	9.81822	4897	9.81807	4762	9.81822	3825			9.81798	4356	9.81802	4312	9.81795	3883	9.81795	4450	9.81795	4688	9.81823	4548
9.82462	4081	9.82455	4707	9.82463	5029	9.8245	4752	9.82453	3825	9.82463	3474			9.82462	4251	9.82467	4235	9.82462	3970	9.82468	4222	9.82453	5130	9.82468	3654			9.82447	4024	9.82448	4421	9.82442	4246	9.82442	4823	9.82442	4151	9.8247	4211
9.83108	3117	9.83102	3739	9.8311	4673	9.83097	4526	9.831	3788	9.83112	4221			9.83108	3823	9.83113	4127	9.83108	4113	9.83115	4547	9.831	4247	9.83115	3692			9.83093	3202	9.83095	3578	9.83088	4311	9.83088	4203	9.83088	4603	9.83117	3694
9.83755	3176	9.83748	4289	9.83757	4522	9.83743	3714	9.83747	4109	9.83758	3834			9.83755	3711	9.83762	3896	9.83755	3929	9.83762	4851	9.83747	4258	9.83763	4083			9.8374	3438	9.83742	4227	9.83735	4598	9.83735	4729	9.83735	4110	9.83763	3849
9.84403	3075	9.84395	4591	9.84403	4784	9.8439	4368	9.84393	4076	9.84405	4013			9.84402	3502	9.84408	4385	9.84402	4103	9.8441	4403	9.84393	4205	9.8441	3669			9.84387	2988	9.84388	3585	9.84383	4165	9.84382	3764	9.84382	3604	9.8441	3869
9.8505	3425	9.85042	3686	9.8505	4218	9.85037	4198	9.85042	4131	9.85052	4239			9.85048	4095	9.85055	4068	9.85048	4124	9.85057	5098	9.85042	3798	9.85057	3802			9.85033	4130	9.85037	4279	9.8503	3533	9.8503	4558	9.8503	3782	9.85057	3740
9.85697	3620	9.85688	3915	9.85697	4207	9.85683	5041	9.85688	3687	9.85698	3364			9.85695	3871	9.85702	4178	9.85697	4820	9.85703	3876	9.85688	3897	9.85703	3698			9.8568	3360	9.85683	3809	9.85677	4210	9.85677	4543	9.85677	3674	9.85703	3431
9.86343	3333	9.86335	3988	9.86343	4746	9.86332	4369	9.86335	4146	9.86345	4148			9.86343	3798	9.86348	4601	9.86343	4584	9.8635	4518	9.86335	3952	9.8635	3940			9.86327	3385	9.8633	4005	9.86323	3838	9.86323	4182	9.86323	4544	9.8635	4390
9.8699	3308	9.86983	4200	9.8699	4636	9.86978	4193	9.86982	4046	9.86992	4456			9.8699	3560	9.86995	3561	9.8699	4278	9.86997	4410	9.86982	4069	9.86997	3575			9.86973	3851	9.86977	3074	9.8697	4354	9.8697	4314	9.8697	4228	9.86998	4087
9.87637	3251	9.8763	4487	9.87638	5104	9.87625	3916	9.87628	3326	9.87638	4130			9.87637	3473	9.87642	4184	9.87637	4547	9.87643	4331	9.87628	4050	9.87643	4045			9.8762	3836	9.87623	4063	9.87617	4494	9.87617	4874	9.87617	4394	9.87645	3821
9.88283	3108	9.88277	4295	9.88285	5164	9.88272	3904	9.88275	4217	9.88287	3658			9.88283	3514	9.88288	4453	9.88283	4198	9.8829	3796	9.88275	3751	9.8829	3508			9.88268	3279	9.8827	3922	9.88263	4097	9.88263	4321	9.88263	4059	9.88292	3823
9.8893	3093	9.88923	3934	9.88932	4230	9.88918	4168	9.88922	3913	9.88933	3206			9.8893	3642	9.88937	4431	9.8893	4323	9.88937	4565	9.88922	3919	9.88937	3691			9.88915	3420	9.88917	3630	9.8891	3808	9.8891	3999	9.8891	3552	9.88938	4116
9.89577	3291	9.8957	4513	9.89578	4107	9.89565	4306	9.89568	3871	9.8958	4213			9.89577	3871	9.89583	4094	9.89577	4264	9.89585	4322	9.89568	3885	9.89585	3617			9.89562	4018	9.89563	3903	9.89558	3708	9.89557	4479	9.89557	3976	9.89585	3835
9.90225	3746	9.90217	4387	9.90225	4231	9.90212	4210	9.90217	3875	9.90227	4206			9.90223	3665	9.9023	3458	9.90223	4106	9.90232	4667	9.90217	3890	9.90232	3729			9.90208	3232	9.90212	3673	9.90205	3646	9.90203	3882	9.90203	3949	9.90232	3859
9.90872	3911	9.90863	4200	9.90872	4774	9.90858	3891	9.90863	3867	9.90873	3789			9.9087	4269	9.90877	4237	9.9087	4363	9.90878	3952	9.90863	3804	9.90878	3642			9.90855	3262	9.90858	4249	9.90852	4265	9.90852	4583	9.90852	4261	9.90878	3451
9.91518	3274	9.9151	4154	9.91518	4866	9.91505	4118	9.9151	3873	9.9152	3610			9.91518	4259	9.91523	3975	9.91518	3892	9.91525	3964	9.9151	3957	9.91525	4021			9.91502	3246	9.91505	3812	9.91498	4006	9.91498	4969	9.91498	3748	9.91525	3759
9.92165	3815	9.92158	4238	9.92165	4077	9.92153	3948	9.92157	3425	9.92167	3100			9.92165	3427	9.9217	4159	9.92165	3548	9.92172	4237	9.92157	4028	9.92172	4066			9.92148	3640	9.92152	3787	9.92145	3768	9.92145	3925	9.92145	4101	9.92172	3305
9.92812	3569	9.92805	3916	9.92812	4478	9.928	4333	9.92803	3636	9.92813	3576			9.92812	3845	9.92817	4616	9.92812	4080	9.92818	4327	9.92803	3695	9.92818	3238			9.92795	3976	9.92798	3595	9.92792	4111	9.92792	4247	9.92792	3647	9.9282	3642
9.93458	3028	9.93452	4250	9.9346	4267	9.93447	4325	9.9345	3927	9.9346	4166			9.93458	3687	9.93463	3899	9.93458	3571	9.93465	4409	9.9345	3777	9.93465	3721			9.93443	3834	9.93445	4241	9.93438	3599	9.93438	3915	9.93438	3980	9.93467	3708
9.94105	3334	9.94098	3344	9.94107	4677	9.94093	3682	9.94097	3888	9.94108	3041			9.94105	4610	9.9411	3914	9.94105	4050	9.94112	4656	9.94097	3987	9.94112	3694			9.9409	3402	9.94092	3915	9.94085	3885	9.94085	3863	9.94085	4398	9.94113	3327
9.94752	3187	9.94745	4027	9.94753	3857	9.9474	4019	9.94743	3874	9.94755	2984			9.94752	3928	9.94758	3782	9.94752	3975	9.94758	4293	9.94743	3985	9.9476	3694			9.94737	3755	9.94738	3759	9.94732	3837	9.94732	4576	9.94732	3585	9.9476	4369
9.954	3438	9.95392	4138	9.954	4483	9.95387	3681	9.9539	3778	9.95402	3305			9.95398	4198	9.95405	4359	9.95398	4143	9.95407	4118	9.9539	3942	9.95407	4124			9.95383	3568	9.95385	3899	9.9538	4203	9.95378	4126	9.95378	4150	9.95407	3500
9.96047	3706	9.96038	3746	9.96047	3949	9.96033	3558	9.96038	3449	9.96048	3882			9.96045	3662	9.96052	3839	9.96045	4039	9.96053	4212	9.96038	3770	9.96053	3769			9.9603	3539	9.96033	3937	9.96027	3798	9.96027	4394	9.96027	3433	9.96053	3665
9.96693	3042	9.96685	3893	9.96693	4562	9.9668	4210	9.96685	3736	9.96695	3585			9.96692	3825	9.96698	3592	9.96693	3805	9.967	4328	9.96685	4006	9.967	3664			9.96677	3637	9.9668	4138	9.96673	3640	9.96673	3057	9.96673	4037	9.967	3515
9.9734	3141	9.97332	3763	9.9734	3881	9.97328	3679	9.97332	3512	9.97342	3660			9.9734	3550	9.97345	4136	9.9734	3526	9.97347	4050	9.97332	3273	9.97347	3229			9.97323	3172	9.97327	4045	9.9732	3723	9.9732	3663	9.9732	3709	9.97347	3421
9.97987	3157	9.9798	4348	9.97987	4252	9.97975	3573	9.97978	3780	9.97988	3588			9.97987	3237	9.97992	4125	9.97987	4021	9.97993	4079	9.97978	3919	9.97993	3569			9.9797	3592	9.97973	3320	9.97967	3636	9.97967	3942	9.97967	3871	9.97995	3551
9.98633	3931	9.98627	4183	9.98635	3789	9.98622	3806	9.98625	3751	9.98635	3278			9.98633	3783	9.98638	3815	9.98633	4112	9.9864	4042	9.98625	4461	9.9864	3261			9.98617	3458	9.9862	3478	9.98613	4372	9.98613	4668	9.98613	3779	9.98642	3356
9.9928	3169	9.99273	4237	9.99282	4180	9.99268	4203	9.99272	4086	9.99283	4029			9.9928	3489	9.99285	3832	9.9928	3507	9.99287	3345	9.99272	3759	9.99287	3561			9.99265	3300	9.99267	3758	9.9926	4256	9.9926	3264	9.9926	4119	9.99288	3653
9.99927	3239	9.9992	4224	9.99928	3737	9.99915	3551	9.99918	3727	9.9993	3449			9.99927	3946	9.99933	4189	9.99927	4140	9.99933	3690	9.99918	3920	9.99933	3199			9.99912	3506	9.99913	3718	9.99907	4405	9.99907	3773	9.99907	3840	9.99935	4011
10.0058	2996	10.0057	4043	10.0058	4157	10.0056	3798	10.0056	4183	10.0058	3584			10.0057	4081	10.0058	4600	10.0057	4291	10.0058	4420	10.0056	3487	10.0058	3610			10.0056	3567	10.0056	3761	10.0055	3594	10.0055	4230	10.0055	4310	10.0058	2980
10.0122	3329	10.0121	3947	10.0122	4471	10.0121	4880	10.0121	3907	10.0122	3565			10.0122	3338	10.0123	3968	10.0122	3495	10.0123	3792	10.0121	4316	10.0123	3741			10.0121	3697	10.0121	4141	10.012	3635	10.012	3935	10.012	3872	10.0123	4075
10.0187	3325	10.0186	3572	10.0187	4183	10.0185	4090	10.0186	4465	10.0187	3357			10.0187	3520	10.0187	4114	10.0187	3660	10.0188	4019	10.0186	3869	10.0188	3628			10.0185	3680	10.0185	3725	10.0185	4432	10.0185	4388	10.0185	3969	10.0188	3750
10.0252	3352	10.0251	3572	10.0252	4233	10.025	3989	10.0251	4160	10.0252	2932			10.0252	3243	10.0252	3643	10.0252	3658	10.0252	4013	10.0251	3845	10.0252	3729			10.025	3858	10.025	3865	10.025	3718	10.025	4305	10.025	3842	10.0252	4491
10.0316	3679	10.0315	4183	10.0316	4559	10.0315	3712	10.0315	3720	10.0316	3100			10.0316	4034	10.0317	4513	10.0316	3606	10.0317	4052	10.0315	3662	10.0317	3696			10.0314	3165	10.0315	3412	10.0314	3875	10.0314	3602	10.0314	3912	10.0317	4262
10.0381	3428	10.038	3907	10.0381	4138	10.038	3963	10.038	3354	10.0381	3309			10.0381	3418	10.0381	3997	10.0381	4617	10.0381	3984	10.038	4175	10.0381	2626			10.0379	3208	10.038	4105	10.0379	3987	10.0379	3830	10.0379	4078	10.0382	3605
10.0445	3687	10.0445	4059	10.0446	4000	10.0444	3522	10.0445	3631	10.0446	2934			10.0445	3907	10.0446	3581	10.0445	3955	10.0446	4148	10.0445	3090	10.0446	3855			10.0444	3791	10.0444	4174	10.0443	4246	10.0443	3432	10.0443	3437	10.0446	4096
10.051	3318	10.051	4329	10.051	4402	10.0509	3993	10.0509	4367	10.0511	3356			10.051	3162	10.0511	3418	10.051	4082	10.0511	3985	10.0509	3671	10.0511	3019			10.0509	4039	10.0509	3550	10.0508	4193	10.0508	3440	10.0508	4060	10.0511	3566
10.0575	3292	10.0574	3667	10.0575	3934	10.0574	3152	10.0574	3262	10.0575	3356			10.0575	3342	10.0576	3686	10.0575	4236	10.0576	3711	10.0574	2982	10.0576	3564			10.0573	3276	10.0573	3547	10.0573	3776	10.0573	3500	10.0573	3409	10.0576	3736
10.064	3308	10.0639	3589	10.064	3635	10.0638	3375	10.0639	3859	10.064	3503			10.064	3608	10.064	4031	10.064	3735	10.064	3374	10.0639	3728	10.064	3682			10.0638	3514	10.0638	3365	10.0638	3590	10.0638	3792	10.0638	3661	10.064	3798
10.0704	2904	10.0703	3550	10.0704	3423	10.0703	4269	10.0703	3715	10.0704	3452			10.0704	3224	10.0705	4093	10.0704	3540	10.0705	4307	10.0703	3468	10.0705	3568			10.0703	3823	10.0703	3215	10.0702	3351	10.0702	4269	10.0702	4139	10.0705	3227
10.0769	3888	10.0768	4173	10.0769	3479	10.0768	3589	10.0768	3905	10.0769	3293			10.0769	3627	10.077	3812	10.0769	3886	10.077	4256	10.0768	3609	10.077	3215			10.0767	3573	10.0768	3305	10.0767	3982	10.0767	3363	10.0767	3804	10.077	3520
10.0834	2994	10.0833	4013	10.0834	3863	10.0832	4192	10.0833	4085	10.0834	3514			10.0834	3554	10.0834	4338	10.0834	3573	10.0834	3590	10.0833	4254	10.0834	3262			10.0832	3357	10.0832	3484	10.0832	4276	10.0832	3706	10.0832	3357	10.0834	3627
10.0898	3058	10.0898	3572	10.0898	4235	10.0897	3480	10.0898	3743	10.0899	3507			10.0898	3167	10.0899	3716	10.0898	3966	10.0899	3405	10.0898	3748	10.0899	3536			10.0897	3405	10.0897	3545	10.0896	3593	10.0896	3934	10.0896	4131	10.0899	3453
10.0963	3164	10.0962	3625	10.0963	3987	10.0962	3629	10.0962	3096	10.0963	3854			10.0963	3930	10.0963	3921	10.0963	3765	10.0964	4029	10.0962	3702	10.0964	3675			10.0961	3034	10.0962	3176	10.0961	3297	10.0961	3887	10.0961	3965	10.0964	3539
10.1028	3414	10.1027	3737	10.1028	3696	10.1027	3421	10.1027	3542	10.1028	3393			10.1028	3600	10.1028	3477	10.1028	3622	10.1028	3666	10.1027	3679	10.1028	4018			10.1026	3610	10.1026	3782	10.1026	3633	10.1026	3703	10.1026	4051	10.1029	4076
10.1092	2927	10.1092	3788	10.1092	3886	10.1091	3812	10.1091	3991	10.1093	3121			10.1092	3684	10.1093	4139	10.1092	3942	10.1093	3648	10.1091	3489	10.1093	3523			10.1091	3403	10.1091	3715	10.109	3878	10.109	4247	10.109	4150	10.1093	3745
10.1157	3241	10.1156	3472	10.1157	3739	10.1156	3507	10.1156	3752	10.1157	3108			10.1157	3514	10.1158	3800	10.1157	4103	10.1158	4106	10.1156	3676	10.1158	3354			10.1156	3784	10.1156	4355	10.1155	3803	10.1155	3681	10.1155	3327	10.1158	3599
10.1222	3467	10.1221	3834	10.1222	5064	10.122	3011	10.1221	3536	10.1222	3451			10.1222	4138	10.1222	4097	10.1222	3761	10.1222	4379	10.1221	4369	10.1222	4007			10.122	3154	10.122	3838	10.122	4060	10.122	3874	10.122	4510	10.1222	4777
10.1287	3499	10.1286	4467	10.1287	4737	10.1285	3635	10.1286	4250	10.1287	3359			10.1286	3423	10.1287	4496	10.1287	4345	10.1287	3859	10.1286	4515	10.1287	4883			10.1285	3583	10.1285	4225	10.1285	5111	10.1285	4412	10.1285	4988	10.1287	5388
10.1351	3555	10.135	5357	10.1351	6277	10.135	4160	10.135	4889	10.1351	5022			10.1351	3723	10.1352	7299	10.1351	5860	10.1352	4383	10.135	6241	10.1352	5483			10.1349	4109	10.135	5670	10.1349	6725	10.1349	4097	10.1349	7397	10.1352	7272
10.1416	4092	10.1415	6905	10.1416	10494	10.1415	6317	10.1415	6948	10.1416	6537			10.1416	3977	10.1416	8416	10.1416	7232	10.1417	4996	10.1415	7637	10.1417	7832			10.1414	3688	10.1415	6541	10.1414	8634	10.1414	4648	10.1414	8227	10.1417	9399
10.148	4642	10.148	11007	10.1481	20411	10.1479	9662	10.148	10706	10.1481	9986			10.148	5053	10.1481	16467	10.148	11715	10.1481	7067	10.148	15402	10.1481	13467			10.1479	4045	10.1479	9179	10.1479	13729	10.1479	5934	10.1479	11216	10.1481	12865
10.1545	8802	10.1545	20488	10.1545	43814	10.1544	20896	10.1544	19513	10.1545	20004			10.1545	6768	10.1546	31698	10.1545	23473	10.1546	10686	10.1544	31171	10.1546	26531			10.1544	4092	10.1544	12440	10.1543	18118	10.1543	8489	10.1543	16286	10.1546	19170
10.161	16264	10.1609	41996	10.161	95987	10.1609	44407	10.1609	41002	10.161	41894			10.161	13956	10.161	64655	10.161	47573	10.161	20236	10.1609	64832	10.161	52345			10.1608	5091	10.1608	23311	10.1608	35279	10.1608	15696	10.1608	27529	10.1611	33972
10.1675	32692	10.1674	86034	10.1675	205389	10.1673	99303	10.1674	83684	10.1675	87054			10.1675	27363	10.1675	135581	10.1675	98764	10.1675	41475	10.1674	139623	10.1675	108371			10.1673	7232	10.1673	38471	10.1672	62455	10.1672	25764	10.1672	51486	10.1675	59512
10.1739	60684	10.1738	162867	10.1739	399383	10.1738	198139	10.1738	168334	10.1739	166498			10.1739	51019	10.174	256861	10.1739	194937	10.174	80780	10.1738	284323	10.174	213280			10.1738	10806	10.1738	69990	10.1737	119452	10.1737	45681	10.1737	96339	10.174	109985
10.1804	108769	10.1803	276622	10.1804	681494	10.1803	357006	10.1803	297138	10.1804	286913			10.1804	87777	10.1805	438853	10.1804	342089	10.1805	143110	10.1803	503831	10.1805	363697			10.1802	16933	10.1803	114478	10.1802	211453	10.1802	80648	10.1802	164119	10.1805	187581
10.1869	167303	10.1868	420767	10.1869	1058091	10.1867	556755	10.1868	469927	10.1869	446226			10.1869	134750	10.1869	677748	10.1869	535489	10.1869	223527	10.1868	773077	10.1869	546709			10.1867	23445	10.1867	180228	10.1867	339061	10.1867	130162	10.1867	265329	10.1869	296889
10.1933	236004	10.1933	577515	10.1933	1421391	10.1932	792505	10.1933	669359	10.1934	611814			10.1933	197630	10.1934	919896	10.1933	742206	10.1934	320010	10.1933	1091759	10.1934	742310			10.1932	35534	10.1932	246121	10.1931	490894	10.1931	192772	10.1931	368061	10.1934	429712
10.1998	286819	10.1997	696544	10.1998	1726993	10.1997	976714	10.1997	822512	10.1998	734328			10.1998	240660	10.1998	1104924	10.1998	937915	10.1999	399860	10.1997	1366642	10.1999	914685			10.1996	48186	10.1997	313069	10.1996	634766	10.1996	237718	10.1996	475679	10.1999	520187
10.2063	318151	10.2062	738927	10.2063	1862114	10.2061	1063022	10.2062	899341	10.2063	791511			10.2063	276160	10.2063	1177320	10.2063	1039319	10.2063	453088	10.2062	1534232	10.2063	973610			10.2061	57572	10.2061	352496	10.2061	717101	10.2061	270262	10.2061	529805	10.2064	595056
10.2127	311386	10.2127	709556	10.2127	1786781	10.2126	1049335	10.2127	864539	10.2128	772107			10.2127	277475	10.2128	1121168	10.2127	1030799	10.2128	447994	10.2127	1512574	10.2128	919511			10.2126	61631	10.2126	359646	10.2125	724269	10.2125	279546	10.2125	533684	10.2128	605763
10.2192	274271	10.2191	597102	10.2192	1533011	10.2191	913824	10.2191	771750	10.2192	646489			10.2192	246819	10.2193	973913	10.2192	898021	10.2193	404564	10.2191	1327490	10.2193	789376			10.219	61668	10.2191	331802	10.219	653279	10.219	256425	10.219	485477	10.2193	544721
10.2257	206866	10.2256	462483	10.2257	1195985	10.2256	727744	10.2256	609866	10.2257	502091			10.2257	201903	10.2257	744468	10.2257	708715	10.2257	321423	10.2256	1051623	10.2257	606694			10.2255	56309	10.2255	266879	10.2255	537780	10.2255	211395	10.2255	398934	10.2257	437197
10.2322	153005	10.2321	319695	10.2322	831773	10.232	516398	10.2321	439749	10.2322	355906			10.2321	147857	10.2322	518649	10.2321	498530	10.2322	232035	10.2321	760038	10.2322	425043			10.232	44557	10.232	201245	10.2319	400744	10.2319	158733	10.2319	300862	10.2322	328352
10.2386	98034	10.2385	203501	10.2386	519306	10.2385	327873	10.2385	281158	10.2386	226478			10.2386	97576	10.2387	327936	10.2386	325856	10.2387	152761	10.2385	499570	10.2387	270957			10.2385	35231	10.2385	139830	10.2384	267042	10.2384	110264	10.2384	215636	10.2387	222283
10.2451	61366	10.245	120140	10.2451	298765	10.2449	194242	10.245	169217	10.2451	132739			10.2451	60711	10.2451	190757	10.2451	192091	10.2452	94624	10.245	301792	10.2452	160522			10.2449	25514	10.2449	93543	10.2449	162740	10.2449	67100	10.2449	139374	10.2452	142064
10.2515	35616	10.2515	68543	10.2515	157507	10.2514	109800	10.2515	96445	10.2516	74890			10.2515	35809	10.2516	106400	10.2515	106679	10.2516	53927	10.2515	170079	10.2516	85556			10.2514	17571	10.2514	59244	10.2514	99688	10.2514	41179	10.2514	87359	10.2516	84818
10.258	21887	10.2579	37215	10.258	83567	10.2579	60477	10.2579	52437	10.258	41843			10.258	21026	10.2581	56269	10.258	56692	10.2581	29927	10.2579	87720	10.2581	48465			10.2578	11932	10.2579	36461	10.2578	55056	10.2578	24864	10.2578	53535	10.2581	53126
10.2645	11292	10.2644	20010	10.2645	44586	10.2644	32232	10.2644	28843	10.2645	22673			10.2645	13538	10.2645	31532	10.2645	30878	10.2645	16821	10.2644	49678	10.2645	25293			10.2643	9731	10.2644	23354	10.2643	32494	10.2643	13785	10.2643	33539	10.2646	33279
10.2709	8223	10.2709	13258	10.271	25252	10.2708	18670	10.2709	17494	10.271	13309			10.2709	9056	10.271	19741	10.2709	18422	10.271	9851	10.2709	27256	10.271	14769			10.2708	8332	10.2708	16585	10.2707	18299	10.2707	9912	10.2707	22936	10.271	22507
10.2774	6272	10.2774	9777	10.2774	16947	10.2773	12042	10.2773	11320	10.2774	9474			10.2774	7057	10.2775	14221	10.2774	11836	10.2775	7439	10.2773	17616	10.2775	9830			10.2773	5841	10.2773	13239	10.2772	13184	10.2772	7172	10.2772	16239	10.2775	16523
10.2839	4351	10.2838	7404	10.2839	13059	10.2838	10414	10.2838	9608	10.2839	7786			10.2839	6198	10.284	10671	10.2839	9291	10.284	6057	10.2838	12295	10.284	7767			10.2837	4836	10.2838	10345	10.2837	10001	10.2837	5849	10.2837	11529	10.284	11379
10.2904	4546	10.2903	7448	10.2904	10585	10.2902	8493	10.2903	6721	10.2904	7139			10.2904	5253	10.2904	8628	10.2904	7657	10.2904	5787	10.2903	9787	10.2904	5958			10.2902	4958	10.2902	9102	10.2902	8981	10.2902	5312	10.2902	10324	10.2904	10340
10.2968	4576	10.2967	6260	10.2968	9569	10.2967	7031	10.2967	7484	10.2968	6078			10.2968	4636	10.2969	8282	10.2968	6967	10.2969	4674	10.2967	8030	10.2969	6455			10.2967	4431	10.2967	8641	10.2966	7525	10.2966	5345	10.2966	9157	10.2969	9602
10.3033	4286	10.3032	6969	10.3033	8618	10.3032	6417	10.3032	6755	10.3033	5183			10.3033	4237	10.3034	8142	10.3033	6209	10.3034	5895	10.3032	7427	10.3034	5930			10.3031	3859	10.3032	6904	10.3031	6429	10.3031	4473	10.3031	8013	10.3034	7543
10.3098	4697	10.3097	5641	10.3098	7604	10.3096	6819	10.3097	6010	10.3098	5920			10.3098	4823	10.3098	6927	10.3098	6143	10.3098	4537	10.3097	7107	10.3098	6116			10.3096	4247	10.3096	6418	10.3096	6050	10.3096	4817	10.3096	8150	10.3099	7128
10.3162	3915	10.3162	5307	10.3163	8332	10.3161	7192	10.3162	6268	10.3163	5620			10.3162	3802	10.3163	6489	10.3162	6144	10.3163	5096	10.3162	6765	10.3163	5814			10.3161	3508	10.3161	6122	10.316	5555	10.316	4868	10.316	5830	10.3163	6918
10.3227	4245	10.3226	5250	10.3227	7222	10.3226	5768	10.3226	5111	10.3227	5332			10.3227	4389	10.3227	6964	10.3227	6367	10.3228	4995	10.3226	6592	10.3228	5970			10.3225	3746	10.3226	6022	10.3225	5304	10.3225	4264	10.3225	6980	10.3228	6824
10.3292	3662	10.3291	4480	10.3292	7164	10.3291	5252	10.3291	5103	10.3292	4276			10.3292	4645	10.3292	5607	10.3292	6337	10.3292	5187	10.3291	5671	10.3293	6973			10.329	3929	10.329	5991	10.329	6158	10.329	4802	10.329	5711	10.3293	6539
10.3356	4056	10.3356	4320	10.3356	7060	10.3355	5309	10.3355	5234	10.3357	4232			10.3356	4130	10.3357	5572	10.3356	6762	10.3357	6262	10.3355	6021	10.3357	9137			10.3355	3510	10.3355	7028	10.3354	5594	10.3354	5061	10.3354	5461	10.3357	5946
10.3421	4185	10.342	4799	10.3421	7001	10.342	5440	10.342	5246	10.3421	4907			10.3421	4056	10.3422	5633	10.3421	7553	10.3422	8012	10.342	6289	10.3422	10893			10.342	3588	10.342	8120	10.3419	5659	10.3419	5259	10.3419	6129	10.3422	5996
10.3486	3300	10.3485	5117	10.3486	6923	10.3484	5616	10.3485	5560	10.3486	4502			10.3486	4123	10.3486	6157	10.3486	8643	10.3486	10248	10.3485	6827	10.3486	13825			10.3484	3555	10.3484	8983	10.3484	6385	10.3484	5272	10.3484	7318	10.3486	5830
10.3551	3726	10.355	4718	10.3551	7100	10.3549	5917	10.355	4539	10.3551	5040			10.3551	4076	10.3551	5944	10.3551	9501	10.3551	13526	10.355	6970	10.3551	17909			10.3549	3613	10.3549	10483	10.3549	5996	10.3549	6822	10.3549	7157	10.3551	5777
10.3615	3685	10.3614	4733	10.3615	6625	10.3614	5770	10.3614	5111	10.3615	4743			10.3615	4578	10.3616	6633	10.3615	11273	10.3616	16370	10.3614	7963	10.3616	20175			10.3613	4454	10.3614	12922	10.3613	7951	10.3613	8230	10.3613	7088	10.3616	6456
10.368	4483	10.3679	4904	10.368	8135	10.3679	6403	10.3679	5329	10.368	4494			10.368	4964	10.368	6252	10.368	11671	10.3681	17146	10.3679	8056	10.3681	20080			10.3678	4523	10.3679	12220	10.3678	8017	10.3678	8122	10.3678	6984	10.3681	6683
10.3744	3257	10.3744	5027	10.3745	6895	10.3743	6901	10.3744	5255	10.3745	4468			10.3744	5563	10.3745	5564	10.3744	12957	10.3745	17927	10.3744	8522	10.3745	20787			10.3743	5045	10.3743	13169	10.3742	7945	10.3742	9544	10.3742	7141	10.3745	6924
10.3809	4568	10.3809	4547	10.3809	7430	10.3808	7313	10.3808	4926	10.381	4977			10.3809	5187	10.381	6987	10.3809	11865	10.381	18260	10.3808	8013	10.381	18173			10.3808	5456	10.3808	12229	10.3807	8690	10.3807	9632	10.3807	6255	10.381	6409
10.3874	4040	10.3873	4987	10.3874	7511	10.3873	7006	10.3873	5013	10.3874	4002			10.3874	5522	10.3874	6512	10.3874	9996	10.3875	15578	10.3873	7934	10.3875	16992			10.3872	5267	10.3872	11711	10.3872	8284	10.3872	10406	10.3872	6369	10.3875	5970
10.3939	3796	10.3938	4408	10.3939	6724	10.3937	7009	10.3938	3957	10.3939	4004			10.3939	4668	10.3939	4890	10.3939	9665	10.3939	13581	10.3938	6838	10.3939	13335			10.3937	5438	10.3937	10342	10.3937	8088	10.3936	8881	10.3936	7023	10.3939	6775
10.4003	3900	10.4002	4842	10.4003	6894	10.4002	7130	10.4002	4278	10.4003	4265			10.4003	5542	10.4004	5867	10.4003	8139	10.4004	11418	10.4002	7133	10.4004	10864			10.4002	5247	10.4002	9136	10.4001	7545	10.4001	7972	10.4001	6069	10.4004	5860
10.4068	3777	10.4067	4608	10.4068	6503	10.4067	6168	10.4067	4286	10.4068	3893			10.4068	4323	10.4069	4705	10.4068	7484	10.4069	9993	10.4067	5852	10.4069	8417			10.4066	5195	10.4067	8540	10.4066	6658	10.4066	7439	10.4066	7110	10.4069	6059
10.4133	3782	10.4132	4490	10.4133	5806	10.4131	4911	10.4132	4629	10.4133	4245			10.4133	4412	10.4133	4345	10.4133	7143	10.4133	8285	10.4132	6342	10.4133	8458			10.4131	4986	10.4131	7763	10.4131	6955	10.4131	5645	10.4131	6103	10.4133	5649
10.4197	3619	10.4197	3620	10.4197	5692	10.4196	6007	10.4197	4098	10.4198	3883			10.4197	4624	10.4198	4477	10.4197	6565	10.4198	6957	10.4197	6122	10.4198	6279			10.4196	4373	10.4196	7551	10.4195	6039	10.4195	5805	10.4195	6174	10.4198	6090
10.4262	3497	10.4261	4203	10.4262	5409	10.4261	5315	10.4261	3683	10.4262	4101			10.4262	3859	10.4262	5059	10.4262	5866	10.4263	6234	10.4261	5408	10.4263	6139			10.426	4273	10.4261	6491	10.426	5504	10.426	5646	10.426	5519	10.4263	5411
10.4327	3433	10.4326	3952	10.4327	5024	10.4326	5058	10.4326	4001	10.4327	4119			10.4327	3832	10.4327	4609	10.4327	5527	10.4327	7263	10.4326	4494	10.4327	6174			10.4325	4522	10.4325	6819	10.4325	5222	10.4325	5194	10.4325	5766	10.4328	5419
10.4391	3285	10.4391	4121	10.4391	4862	10.439	4676	10.439	4329	10.4392	4316			10.4391	4444	10.4392	4120	10.4391	4956	10.4392	5191	10.439	5207	10.4392	5643			10.439	4457	10.439	5919	10.4389	5201	10.4389	5672	10.4389	5431	10.4392	3647
10.4456	2931	10.4455	4361	10.4456	5039	10.4455	4851	10.4455	5112	10.4456	3057			10.4456	4046	10.4457	4070	10.4456	5039	10.4457	4824	10.4455	5098	10.4457	4910			10.4454	4061	10.4455	5997	10.4454	5042	10.4454	5240	10.4454	4566	10.4457	4497
10.4521	3288	10.452	3416	10.4521	4933	10.452	4408	10.452	3850	10.4521	3604			10.4521	3338	10.4521	4466	10.4521	5089	10.4521	4869	10.452	4182	10.4521	5304			10.4519	4160	10.452	5939	10.4519	4819	10.4519	4142	10.4519	4526	10.4521	3995
10.4586	2758	10.4585	4533	10.4586	5071	10.4584	4145	10.4585	4150	10.4586	3891			10.4585	3991	10.4586	4286	10.4586	5085	10.4586	5252	10.4585	4677	10.4586	4546			10.4584	3877	10.4584	5285	10.4583	4992	10.4583	4327	10.4583	4483	10.4586	4557
10.465	3387	10.4649	4210	10.465	4584	10.4649	4973	10.4649	2917	10.465	3301			10.465	4485	10.4651	3616	10.465	5518	10.4651	5251	10.4649	4016	10.4651	5162			10.4649	3806	10.4649	5518	10.4648	5003	10.4648	4426	10.4648	4823	10.4651	4161
10.4715	3770	10.4714	4290	10.4715	4924	10.4714	4468	10.4714	3900	10.4715	3430			10.4715	3688	10.4715	5511	10.4715	5011	10.4716	5945	10.4714	6138	10.4716	5552			10.4713	3657	10.4713	5873	10.4713	5822	10.4713	4197	10.4713	5518	10.4716	4414
10.4779	4016	10.4779	4552	10.478	5133	10.4778	4962	10.4779	4597	10.478	4456			10.4779	4689	10.478	8998	10.4779	6345	10.478	5013	10.4779	6754	10.478	7141			10.4778	4345	10.4778	6148	10.4778	7061	10.4778	4726	10.4778	6528	10.478	6178
10.4844	4509	10.4843	6144	10.4844	6962	10.4843	5977	10.4843	6136	10.4845	4567			10.4844	7775	10.4845	15751	10.4844	10621	10.4845	7493	10.4843	16644	10.4845	12273			10.4843	4867	10.4843	8965	10.4842	11797	10.4842	6426	10.4842	11640	10.4845	10013
10.4909	4991	10.4908	9905	10.4909	11309	10.4908	8609	10.4908	9901	10.4909	6106			10.4909	13909	10.4909	34120	10.4909	22091	10.4909	10581	10.4908	36812	10.4909	23827			10.4907	6056	10.4908	17617	10.4907	22940	10.4907	10500	10.4907	21611	10.491	21000
10.4974	8242	10.4973	17010	10.4974	22220	10.4972	16164	10.4973	17845	10.4974	11821			10.4974	28814	10.4974	68706	10.4974	41831	10.4974	19858	10.4973	74752	10.4974	45728			10.4972	10724	10.4972	33099	10.4972	47078	10.4971	16424	10.4971	42363	10.4974	40972
10.5038	14647	10.5038	30108	10.5038	41210	10.5037	27603	10.5038	31494	10.5038	19622			10.5038	50822	10.5039	125608	10.5038	75967	10.5039	37405	10.5038	138976	10.5039	84050			10.5037	18172	10.5037	59120	10.5036	93541	10.5036	30032	10.5036	80395	10.5039	77366
10.5103	22098	10.5102	47775	10.5103	66657	10.5102	49203	10.5102	54358	10.5103	34350			10.5103	84939	10.5104	213148	10.5103	134396	10.5104	61747	10.5102	244441	10.5104	136347			10.5101	30897	10.5102	97201	10.5101	162330	10.5101	53125	10.5101	136359	10.5104	137009
10.5168	33948	10.5167	70576	10.5168	101342	10.5166	73387	10.5167	80452	10.5168	52173			10.5168	130998	10.5168	318659	10.5168	204175	10.5168	96314	10.5167	367577	10.5168	210302			10.5166	46135	10.5166	148863	10.5166	251557	10.5166	81724	10.5166	207239	10.5168	211260
10.5232	47224	10.5232	93636	10.5232	136532	10.5231	99724	10.5231	111053	10.5233	69503			10.5232	182688	10.5233	418915	10.5232	278530	10.5233	126545	10.5231	506097	10.5233	274468			10.5231	68715	10.5231	204807	10.523	349768	10.523	112265	10.523	295100	10.5233	297925
10.5297	56460	10.5296	112176	10.5297	174068	10.5296	122238	10.5296	142939	10.5297	85899			10.5297	225032	10.5297	507445	10.5297	343129	10.5298	159809	10.5296	614897	10.5298	328081			10.5295	91726	10.5296	256254	10.5295	442322	10.5295	137865	10.5295	365850	10.5298	363492
10.5362	65031	10.5361	125494	10.5362	192105	10.536	140169	10.5361	165096	10.5362	96504			10.5362	245258	10.5362	537663	10.5362	374539	10.5362	181121	10.5361	675285	10.5362	350952			10.536	109321	10.536	284576	10.536	494166	10.536	160314	10.536	413268	10.5363	400122
10.5426	62407	10.5426	124556	10.5427	191621	10.5425	137756	10.5426	171952	10.5427	97065			10.5426	241500	10.5427	511701	10.5426	365708	10.5427	176052	10.5426	667182	10.5427	333828			10.5425	114995	10.5425	284751	10.5424	494934	10.5424	161832	10.5424	431092	10.5427	399216
10.5491	58333	10.549	112859	10.5491	175000	10.549	129567	10.549	152214	10.5491	88767			10.5491	213539	10.5492	449872	10.5491	324696	10.5492	158627	10.549	596517	10.5492	295752			10.5489	113288	10.549	266257	10.5489	443136	10.5489	148003	10.5489	396138	10.5492	362910
10.5556	50272	10.5555	92523	10.5556	148348	10.5555	108247	10.5555	129891	10.5556	76126			10.5556	177700	10.5556	352132	10.5556	264169	10.5556	126285	10.5555	469975	10.5556	228257			10.5554	101865	10.5554	229224	10.5554	363800	10.5554	120843	10.5554	333809	10.5556	304215
10.562	37355	10.562	68639	10.562	110295	10.5619	84139	10.562	100621	10.5621	54864			10.562	131234	10.5621	255398	10.562	193104	10.5621	92846	10.562	353936	10.5621	161944			10.5619	87399	10.5619	177133	10.5618	272687	10.5618	89902	10.5618	262618	10.5621	236794
10.5685	27044	10.5684	46503	10.5685	78439	10.5684	57302	10.5684	70001	10.5685	40014			10.5685	88677	10.5686	169539	10.5685	130482	10.5686	62387	10.5684	245656	10.5686	111579			10.5684	69513	10.5684	137288	10.5683	190404	10.5683	67809	10.5683	200731	10.5686	172237
10.575	19124	10.5749	33119	10.575	53172	10.5749	38513	10.5749	45737	10.575	28492			10.575	57409	10.575	108214	10.575	83022	10.575	39810	10.5749	160400	10.575	69704			10.5748	51819	10.5748	98085	10.5748	124310	10.5748	44320	10.5748	144491	10.575	122759
10.5815	12881	10.5814	22133	10.5815	34795	10.5813	24164	10.5814	31060	10.5815	18228			10.5815	35263	10.5815	70910	10.5815	46620	10.5815	26533	10.5814	98717	10.5815	42304			10.5813	39923	10.5813	69909	10.5813	77341	10.5813	30290	10.5813	100287	10.5815	86778
10.5879	9352	10.5878	14065	10.5879	23004	10.5878	15251	10.5878	21391	10.5879	12625			10.5879	22396	10.588	45542	10.5879	29775	10.588	15199	10.5878	61112	10.588	25639			10.5877	29761	10.5878	49931	10.5877	48144	10.5877	18686	10.5877	70421	10.588	60397
10.5944	7946	10.5943	11961	10.5944	17202	10.5943	11367	10.5943	15789	10.5944	8726			10.5944	16009	10.5944	29946	10.5944	18737	10.5945	10636	10.5943	37542	10.5945	17430			10.5942	23931	10.5943	37697	10.5942	28256	10.5942	12547	10.5942	50235	10.5945	43964
10.6008	6249	10.6008	8806	10.6009	11146	10.6007	8401	10.6008	11411	10.6009	8173			10.6008	11387	10.6009	21475	10.6008	14113	10.6009	6985	10.6008	26237	10.6009	11830			10.6007	19504	10.6007	29801	10.6006	18966	10.6006	10066	10.6006	38117	10.6009	31381
10.6073	6190	10.6073	8630	10.6073	9578	10.6072	6882	10.6072	9641	10.6074	6868			10.6073	8707	10.6074	17432	10.6073	10625	10.6074	6540	10.6072	18403	10.6074	9657			10.6072	16338	10.6072	23938	10.6071	15398	10.6071	6431	10.6071	30374	10.6074	25399
10.6138	4911	10.6137	7624	10.6138	8758	10.6137	6038	10.6137	8770	10.6138	6624			10.6138	7739	10.6138	13769	10.6138	7859	10.6139	6350	10.6137	16130	10.6139	8366			10.6136	12959	10.6137	20561	10.6136	12071	10.6136	7057	10.6136	25739	10.6139	20756
10.6203	4325	10.6202	7802	10.6203	8521	10.6201	5867	10.6202	7727	10.6203	6457			10.6203	7237	10.6203	12814	10.6203	7574	10.6203	5677	10.6202	13772	10.6203	7624			10.6201	10354	10.6201	19320	10.6201	10454	10.6201	5347	10.6201	21669	10.6203	19033
10.6267	3885	10.6266	6540	10.6267	8460	10.6266	5595	10.6266	7933	10.6267	6403			10.6267	6750	10.6268	12767	10.6267	6404	10.6268	5618	10.6266	12908	10.6268	6797			10.6266	9673	10.6266	17828	10.6265	7960	10.6265	5089	10.6265	18896	10.6268	17184
10.6332	5278	10.6331	7101	10.6332	8545	10.6331	6419	10.6331	7196	10.6332	6780			10.6332	6223	10.6333	11430	10.6332	7586	10.6333	4659	10.6331	12177	10.6333	7911			10.633	9000	10.6331	15289	10.633	8378	10.633	5462	10.633	17581	10.6333	15173
10.6397	5773	10.6396	9543	10.6397	14583	10.6395	8365	10.6396	9908	10.6397	7113			10.6397	5896	10.6397	13405	10.6397	9333	10.6397	6252	10.6396	16215	10.6397	10862			10.6395	8305	10.6395	13307	10.6395	10298	10.6395	4732	10.6395	17171	10.6397	14334
10.6461	7973	10.6461	17328	10.6462	25778	10.646	14637	10.6461	16683	10.6462	16423			10.6461	8844	10.6462	22641	10.6461	16079	10.6462	10121	10.6461	24294	10.6462	17852			10.646	7253	10.646	15090	10.6459	11510	10.6459	5115	10.6459	18581	10.6462	17972
10.6526	15151	10.6525	34787	10.6526	57348	10.6525	33162	10.6525	35081	10.6526	32933			10.6526	14312	10.6526	41055	10.6526	32913	10.6527	17384	10.6525	44589	10.6527	37206			10.6524	7614	10.6525	19207	10.6524	17061	10.6524	8856	10.6524	25606	10.6527	23849
10.6591	26822	10.659	71772	10.6591	126373	10.659	72913	10.659	70974	10.6591	68424			10.6591	27785	10.6591	86154	10.6591	67147	10.6591	35026	10.659	96427	10.6592	78742			10.6589	9922	10.6589	29234	10.6589	30273	10.6589	17190	10.6589	40819	10.6592	41445
10.6655	56012	10.6655	140693	10.6655	258521	10.6654	142915	10.6654	148104	10.6656	141902			10.6655	52930	10.6656	177699	10.6655	140512	10.6656	69776	10.6654	194440	10.6656	156653			10.6654	13902	10.6654	51551	10.6654	59917	10.6653	30141	10.6653	72634	10.6656	68522
10.672	100175	10.6719	257578	10.672	479301	10.6719	277250	10.6719	273101	10.672	262708			10.672	94236	10.6721	316520	10.672	266550	10.6721	127252	10.6719	358426	10.6721	289076			10.6718	18993	10.6719	89716	10.6718	112160	10.6718	55728	10.6718	126512	10.6721	128333
10.6785	159546	10.6784	424820	10.6785	798232	10.6784	483530	10.6784	472795	10.6785	440555			10.6785	156859	10.6785	525618	10.6785	441919	10.6785	216907	10.6784	615856	10.6785	475339			10.6783	30755	10.6784	140952	10.6783	190378	10.6783	93684	10.6783	215356	10.6785	213430
10.685	239697	10.6849	632163	10.685	1202233	10.6848	731686	10.6849	722360	10.685	663987			10.685	234948	10.685	793284	10.685	692350	10.685	327147	10.6849	954399	10.685	706928			10.6848	46257	10.6848	219032	10.6847	302458	10.6847	140862	10.6847	321794	10.685	326537
10.6914	321518	10.6913	824670	10.6914	1659015	10.6913	1022961	10.6913	992803	10.6914	892977			10.6914	326198	10.6915	1078604	10.6914	973449	10.6915	453974	10.6913	1327267	10.6915	945936			10.6913	62467	10.6913	293451	10.6912	427503	10.6912	197971	10.6912	452770	10.6915	455117
10.6979	386054	10.6978	1001152	10.6979	2077318	10.6978	1276704	10.6978	1258764	10.6979	1091365			10.6979	395469	10.6979	1317693	10.6979	1219107	10.698	548655	10.6978	1698179	10.698	1126563			10.6977	76875	10.6977	361770	10.6977	545789	10.6977	246422	10.6977	570175	10.698	560284
10.7043	413626	10.7043	1063985	10.7044	2388346	10.7042	1433134	10.7043	1410505	10.7044	1171483			10.7043	419438	10.7044	1458070	10.7043	1370409	10.7044	596956	10.7043	1961360	10.7044	1249980			10.7042	89601	10.7042	407233	10.7042	633166	10.7042	269346	10.7042	652766	10.7044	646113
10.7108	395790	10.7108	1034296	10.7108	2526358	10.7107	1437117	10.7107	1425549	10.7109	1128957			10.7108	412293	10.7109	1441024	10.7108	1398150	10.7109	585410	10.7107	2059305	10.7109	1237221			10.7107	95349	10.7107	403840	10.7106	663161	10.7106	281255	10.7106	689403	10.7109	668031
10.7173	342504	10.7172	898594	10.7173	2389240	10.7172	1301599	10.7172	1315901	10.7173	999036			10.7173	368163	10.7173	1286964	10.7173	1299173	10.7174	515466	10.7172	1968142	10.7174	1110505			10.7171	90235	10.7172	374761	10.7171	620190	10.7171	257489	10.7171	665967	10.7174	610565
10.7238	268877	10.7237	712060	10.7238	2072413	10.7236	1053693	10.7237	1105745	10.7238	799703			10.7238	299013	10.7238	1042552	10.7238	1095886	10.7238	420291	10.7237	1702914	10.7238	903754			10.7236	80826	10.7236	318214	10.7236	532574	10.7236	211332	10.7236	580201	10.7238	524570
10.7302	194327	10.7302	523940	10.7302	1659507	10.7301	806303	10.7302	843452	10.7302	601798			10.7302	224264	10.7303	801760	10.7302	846805	10.7303	317590	10.7302	1366819	10.7303	676931			10.7301	69492	10.7301	270874	10.73	430038	10.73	170897	10.73	497191	10.7303	434615
10.7367	140871	10.7366	386615	10.7367	1254384	10.7366	595556	10.7366	632483	10.7367	460150			10.7367	162377	10.7368	598671	10.7367	622276	10.7368	235359	10.7366	1021107	10.7368	511801			10.7365	65392	10.7366	269652	10.7365	355661	10.7365	141332	10.7365	447559	10.7368	390345
10.7432	132257	10.7431	366232	10.7432	968815	10.7431	479336	10.7431	547262	10.7432	415577			10.7432	139861	10.7432	517324	10.7432	523572	10.7432	213089	10.7431	816015	10.7432	465410			10.743	78300	10.743	356413	10.743	352205	10.743	165169	10.743	523322	10.7432	452339
10.7496	170966	10.7496	490277	10.7497	941912	10.7495	536519	10.7495	641666	10.7497	536667			10.7496	164483	10.7497	622748	10.7496	605647	10.7497	279613	10.7495	826325	10.7497	603578			10.7495	132988	10.7495	583858	10.7494	501049	10.7494	252681	10.7494	792837	10.7497	670375
10.7561	282873	10.756	775846	10.7561	1224989	10.756	798763	10.756	946780	10.7561	839559			10.7561	261180	10.7561	933681	10.7561	908177	10.7562	453470	10.756	1121056	10.7562	953960			10.756	238119	10.756	985878	10.7559	813852	10.7559	451236	10.7559	1285672	10.7562	1087662
10.7626	443434	10.7625	1177697	10.7626	1819009	10.7624	1249691	10.7625	1467909	10.7626	1297364			10.7626	402011	10.7626	1420920	10.7626	1415344	10.7626	706729	10.7625	1695086	10.7626	1478625			10.7624	406568	10.7624	1510955	10.7624	1317564	10.7624	733837	10.7624	2004331	10.7627	1686912
10.769	622849	10.769	1632037	10.7691	2666040	10.7689	1769783	10.769	2106234	10.7691	1808524			10.769	588710	10.7691	1984368	10.769	2044237	10.7691	1035322	10.769	2447833	10.7691	2036661			10.7689	597764	10.7689	2061639	10.7688	1941342	10.7688	1059631	10.7688	2827518	10.7691	2351366
10.7755	788191	10.7754	2006916	10.7755	3568582	10.7754	2288649	10.7754	2731166	10.7755	2265240			10.7755	763943	10.7756	2547632	10.7755	2687224	10.7756	1310855	10.7754	3240896	10.7756	2582803			10.7753	773618	10.7754	2559453	10.7753	2577104	10.7753	1373141	10.7753	3617743	10.7756	2983168
10.782	884241	10.7819	2244922	10.782	4424930	10.7819	2686759	10.7819	3153234	10.782	2598710			10.782	870599	10.782	2894540	10.782	3196479	10.782	1484757	10.7819	3952436	10.782	2933192			10.7818	885104	10.7819	2853986	10.7818	3080265	10.7818	1556119	10.7818	4280806	10.782	3457135
10.7884	885679	10.7884	2232997	10.7884	4952119	10.7883	2760961	10.7884	3388508	10.7885	2626858			10.7884	879806	10.7885	2959918	10.7884	3411193	10.7885	1521170	10.7884	4299688	10.7885	2990538			10.7883	918282	10.7883	2839142	10.7882	3274107	10.7882	1565444	10.7882	4525265	10.7885	3546156
10.7949	791911	10.7948	1990766	10.7949	4981127	10.7948	2573302	10.7948	3241038	10.7949	2360132			10.7949	810176	10.795	2697040	10.7949	3265242	10.795	1388095	10.7948	4256880	10.795	2720749			10.7948	858125	10.7948	2546840	10.7947	3187795	10.7947	1453138	10.7947	4340785	10.795	3282410
10.8014	656678	10.8013	1608355	10.8014	4490959	10.8013	2148251	10.8013	2743646	10.8014	1949044			10.8014	683379	10.8014	2206507	10.8014	2847913	10.8015	1168275	10.8013	3731544	10.8015	2253258			10.8012	715831	10.8012	2085878	10.8012	2737230	10.8012	1185662	10.8012	3724727	10.8015	2732811
10.8079	504447	10.8078	1176316	10.8079	3519866	10.8077	1631243	10.8078	2067722	10.8079	1446493			10.8079	533180	10.8079	1640569	10.8079	2220202	10.8079	875276	10.8078	2913491	10.8079	1645882			10.8077	562900	10.8077	1534615	10.8077	2124286	10.8077	903633	10.8077	2854297	10.8079	2073618
10.8143	359513	10.8142	787389	10.8143	2480146	10.8142	1126152	10.8142	1427446	10.8143	981102			10.8143	380228	10.8144	1136535	10.8143	1545251	10.8144	611142	10.8142	2045975	10.8144	1123200			10.8142	409071	10.8142	1047993	10.8141	1513135	10.8141	640309	10.8141	1951048	10.8144	1426058
10.8208	235758	10.8207	508063	10.8208	1554227	10.8207	720339	10.8207	899124	10.8208	611460			10.8208	254348	10.8209	719054	10.8208	991234	10.8209	404666	10.8207	1301781	10.8209	717532			10.8206	280262	10.8207	671373	10.8206	987658	10.8206	422116	10.8206	1243320	10.8209	880517
10.8273	150736	10.8272	298685	10.8273	904708	10.8271	434124	10.8272	531088	10.8273	367161			10.8272	160499	10.8273	423066	10.8272	596754	10.8273	255057	10.8272	775005	10.8273	423220			10.8271	178900	10.8271	398098	10.8271	593363	10.827	266154	10.827	733525	10.8273	518651
10.8337	92273	10.8337	173318	10.8337	495520	10.8336	247615	10.8337	304442	10.8338	209388			10.8337	95817	10.8338	240512	10.8337	333569	10.8338	151127	10.8337	434515	10.8338	241343			10.8336	108999	10.8336	226526	10.8335	340098	10.8335	159745	10.8335	408945	10.8338	286034
10.8402	53233	10.8401	95418	10.8402	262668	10.8401	142647	10.8401	166866	10.8402	112497			10.8402	58004	10.8402	130703	10.8402	185167	10.8403	87822	10.8401	235109	10.8403	133537			10.84	65880	10.8401	129699	10.84	187160	10.84	95011	10.84	217981	10.8403	159990
10.8467	30471	10.8466	55362	10.8467	134340	10.8465	78387	10.8466	89160	10.8467	64390			10.8467	34347	10.8467	70894	10.8467	98504	10.8467	49473	10.8466	124447	10.8467	70885			10.8465	39492	10.8465	70795	10.8465	105675	10.8465	54982	10.8465	116759	10.8467	89430
10.8531	18770	10.8531	30910	10.8531	72919	10.853	42891	10.853	51198	10.8531	36972			10.8531	20765	10.8532	41354	10.8531	53293	10.8532	28648	10.853	65381	10.8532	41101			10.853	22801	10.853	41354	10.8529	58326	10.8529	32839	10.8529	64254	10.8532	52054
10.8596	12301	10.8595	19552	10.8596	39707	10.8595	25010	10.8595	28591	10.8596	21630			10.8596	13085	10.8597	25468	10.8596	29702	10.8597	17531	10.8595	36893	10.8597	23179			10.8594	14699	10.8595	26701	10.8594	32503	10.8594	19500	10.8594	39263	10.8597	32204
10.8661	8357	10.866	13247	10.8661	25009	10.8659	16520	10.866	18213	10.8661	14237			10.8661	9336	10.8661	17291	10.8661	18838	10.8661	12167	10.866	23788	10.8661	14527			10.8659	10251	10.8659	17908	10.8659	19832	10.8659	11646	10.8659	24162	10.8661	19536
10.8725	6056	10.8725	10943	10.8726	15972	10.8724	10857	10.8725	13217	10.8726	11488			10.8725	6876	10.8726	10808	10.8725	14216	10.8726	8765	10.8725	16589	10.8726	10506			10.8724	7743	10.8724	13197	10.8723	13955	10.8723	9319	10.8723	18026	10.8726	15529
10.879	5185	10.8789	8601	10.879	13915	10.8789	10023	10.8789	11384	10.879	8086			10.879	5571	10.8791	10552	10.879	10290	10.8791	5803	10.8789	13133	10.8791	9003			10.8788	6007	10.8789	11192	10.8788	11722	10.8788	7907	10.8788	14044	10.8791	13091
10.8855	5339	10.8854	8091	10.8855	11785	10.8854	7906	10.8854	8951	10.8855	7889			10.8855	5158	10.8855	9608	10.8855	8941	10.8856	5326	10.8854	12167	10.8856	6564			10.8853	5575	10.8854	10427	10.8853	9300	10.8853	6249	10.8853	12006	10.8856	11997
10.8919	4102	10.8919	7318	10.8919	11027	10.8918	6766	10.8919	8164	10.892	7320			10.8919	4659	10.892	8182	10.8919	7792	10.892	4411	10.8919	11066	10.892	6839			10.8918	4301	10.8918	7559	10.8918	7789	10.8918	5108	10.8918	11810	10.892	9579
10.8984	4145	10.8983	6449	10.8984	8742	10.8983	7382	10.8983	8385	10.8984	5946			10.8984	4521	10.8985	7063	10.8984	7266	10.8985	4349	10.8983	9236	10.8985	5880			10.8983	3786	10.8983	8920	10.8982	7173	10.8982	4254	10.8982	10283	10.8985	9277
10.9049	4707	10.9048	5421	10.9049	8748	10.9048	5235	10.9048	7473	10.9049	6319			10.9049	4367	10.9049	7365	10.9049	6983	10.9049	3635	10.9048	8677	10.9049	5587			10.9047	4914	10.9047	8555	10.9047	6798	10.9047	4486	10.9047	10003	10.9049	7801
10.9114	3505	10.9113	5557	10.9114	7544	10.9112	5460	10.9113	6665	10.9114	5502			10.9114	4951	10.9114	6681	10.9114	5460	10.9114	4990	10.9113	8862	10.9114	6548			10.9112	4103	10.9112	6931	10.9111	5677	10.9111	4429	10.9111	9138	10.9114	7268
10.9178	4190	10.9177	5640	10.9178	8083	10.9177	4187	10.9177	6605	10.9178	5580			10.9178	4224	10.9179	6559	10.9178	5391	10.9179	4255	10.9177	7729	10.9179	5072			10.9177	3961	10.9177	7722	10.9176	5351	10.9176	4538	10.9176	8208	10.9179	7238
10.9243	3111	10.9242	5542	10.9243	7360	10.9242	4407	10.9242	6201	10.9243	4670			10.9243	4124	10.9243	6795	10.9243	5329	10.9244	3337	10.9242	6470	10.9244	4629			10.9241	3888	10.9241	6536	10.9241	5041	10.9241	4078	10.9241	8972	10.9244	6914
10.9307	4106	10.9307	5647	10.9308	6493	10.9306	4857	10.9307	6092	10.9308	4119			10.9307	3675	10.9308	5994	10.9307	5984	10.9308	2920	10.9307	7583	10.9308	5065			10.9306	3800	10.9306	7001	10.9306	5629	10.9306	3407	10.9306	8673	10.9308	6771
10.9372	3587	10.9372	4908	10.9372	7253	10.9371	4818	10.9371	6131	10.9373	3922			10.9372	3423	10.9373	5895	10.9372	5283	10.9373	3663	10.9371	7063	10.9373	4574			10.9371	3660	10.9371	7152	10.937	4408	10.937	3454	10.937	7901	10.9373	7185
10.9437	3780	10.9436	5072	10.9437	6140	10.9436	4475	10.9436	5918	10.9437	4589			10.9437	3552	10.9437	6818	10.9437	5463	10.9438	3386	10.9436	7641	10.9438	5325			10.9435	4337	10.9436	6839	10.9435	5265	10.9435	2956	10.9435	7102	10.9438	6381
10.9502	3000	10.9501	5106	10.9502	6380	10.95	4460	10.9501	4924	10.9502	4657			10.9502	3358	10.9502	6452	10.9502	5629	10.9502	2990	10.9501	6939	10.9502	4499			10.95	3354	10.95	6479	10.95	4787	10.95	3547	10.95	7166	10.9502	5536
10.9566	3407	10.9566	5662	10.9566	5950	10.9565	3932	10.9566	5336	10.9566	4224			10.9566	3864	10.9567	6023	10.9566	4747	10.9567	2993	10.9566	5530	10.9567	4574			10.9565	3739	10.9565	5702	10.9564	4921	10.9564	3335	10.9564	7271	10.9567	5661
10.9631	3319	10.963	5224	10.9631	5030	10.963	3691	10.963	5653	10.9631	4055			10.9631	4231	10.9632	5417	10.9631	3635	10.9632	3157	10.963	6141	10.9632	5156			10.9629	3523	10.963	5389	10.9629	4976	10.9629	2881	10.9629	7262	10.9632	5202
10.9696	3322	10.9695	4614	10.9696	6019	10.9695	4624	10.9695	6376	10.9696	4313			10.9696	3677	10.9696	5846	10.9696	4316	10.9696	3746	10.9695	5592	10.9696	4532			10.9694	3450	10.9694	5145	10.9694	3741	10.9694	3039	10.9694	8014	10.9696	5507
10.976	3645	10.976	5201	10.9761	5328	10.9759	3305	10.9759	6017	10.9761	4081			10.976	4047	10.9761	5474	10.976	5682	10.9761	3164	10.9759	7049	10.9761	3744			10.9759	3808	10.9759	4746	10.9758	4473	10.9758	3874	10.9758	7529	10.9761	5170
10.9825	3880	10.9824	4583	10.9825	5474	10.9824	3639	10.9824	6240	10.9825	3775			10.9825	4317	10.9826	5568	10.9825	4442	10.9826	3281	10.9824	6777	10.9826	3807			10.9824	3306	10.9824	5375	10.9823	4393	10.9823	3714	10.9823	8167	10.9826	5194
10.989	4459	10.9889	3799	10.989	5074	10.9888	3577	10.9889	6702	10.989	3447			10.989	4091	10.989	5393	10.989	4150	10.9891	2456	10.9889	6475	10.9891	4602			10.9888	3633	10.9888	6303	10.9888	4266	10.9888	3410	10.9888	7125	10.9891	4710
10.9954	3926	10.9954	4718	10.9954	5433	10.9953	3672	10.9954	6541	10.9955	3729			10.9954	3518	10.9955	4870	10.9954	3972	10.9955	3080	10.9954	6266	10.9955	4601			10.9953	3124	10.9953	5446	10.9953	4295	10.9952	3271	10.9952	6737	10.9955	5259
11.0019	3535	11.0018	4234	11.0019	4738	11.0018	3632	11.0018	5936	11.0019	3530			11.0019	3533	11.002	4327	11.0019	3311	11.002	3265	11.0018	7012	11.002	4253			11.0017	3654	11.0018	4262	11.0017	4486	11.0017	3388	11.0017	7442	11.002	4975
11.0084	4215	11.0083	5040	11.0084	4801	11.0083	3643	11.0083	5046	11.0084	3138			11.0084	3910	11.0084	4742	11.0084	4223	11.0084	3103	11.0083	6672	11.0084	5011			11.0082	3172	11.0083	5097	11.0082	3409	11.0082	3279	11.0082	7464	11.0084	4603
11.0148	3437	11.0148	3993	11.0148	4377	11.0147	3490	11.0148	5862	11.0149	3787			11.0148	4217	11.0149	4624	11.0148	4331	11.0149	2989	11.0148	6104	11.0149	5844			11.0147	2925	11.0147	5099	11.0146	3972	11.0146	3128	11.0146	6069	11.0149	4738
11.0213	3365	11.0213	4229	11.0213	4620	11.0212	3614	11.0212	4953	11.0213	3910			11.0213	3728	11.0214	5367	11.0213	4411	11.0214	3161	11.0212	5238	11.0214	5808			11.0212	3091	11.0212	5406	11.0211	3895	11.0211	2728	11.0211	5696	11.0214	5494
11.0278	3187	11.0277	4373	11.0278	4521	11.0277	3376	11.0277	4899	11.0278	3823			11.0278	3307	11.0278	4947	11.0278	3914	11.0279	3379	11.0277	5750	11.0279	5580			11.0276	3683	11.0276	3773	11.0276	4358	11.0276	3433	11.0276	5718	11.0279	4793
11.0343	3305	11.0342	3836	11.0343	5131	11.0341	4415	11.0342	4627	11.0343	3339			11.0343	3272	11.0343	5129	11.0343	3369	11.0343	3242	11.0342	6794	11.0343	5221			11.0341	3136	11.0341	4590	11.0341	4082	11.0341	2856	11.0341	5221	11.0343	4437
11.0407	3331	11.0406	4521	11.0407	4704	11.0406	3604	11.0406	4260	11.0407	4254			11.0407	3735	11.0408	4819	11.0407	3342	11.0408	3282	11.0406	5159	11.0408	5916			11.0406	2945	11.0406	4234	11.0405	4392	11.0405	2856	11.0405	4510	11.0408	4818
11.0472	2818	11.0471	3243	11.0472	4677	11.0471	3689	11.0471	3943	11.0472	3208			11.0472	3347	11.0473	5007	11.0472	3975	11.0473	3408	11.0471	5976	11.0473	6236			11.047	3427	11.0471	4809	11.047	4006	11.047	2996	11.047	5247	11.0473	4908
11.0537	3069	11.0536	4049	11.0537	4105	11.0535	2872	11.0536	3854	11.0537	3246			11.0536	3960	11.0537	4541	11.0536	3598	11.0537	3592	11.0536	5138	11.0537	5277			11.0535	3695	11.0535	4108	11.0535	4159	11.0535	3210	11.0535	4664	11.0537	4692
11.0601	3344	11.0601	4083	11.0601	4437	11.06	3190	11.0601	3989	11.0602	3844			11.0601	3089	11.0602	5091	11.0601	3988	11.0602	2788	11.0601	6465	11.0602	6191			11.06	3114	11.06	4450	11.0599	3466	11.0599	2654	11.0599	4890	11.0602	6388
11.0666	2953	11.0665	3427	11.0666	4147	11.0665	2862	11.0665	3182	11.0666	3152			11.0666	3403	11.0666	4583	11.0666	4445	11.0667	3246	11.0665	5596	11.0667	5540			11.0664	2996	11.0665	4730	11.0664	4030	11.0664	3111	11.0664	4995	11.0667	5308
11.0731	2420	11.073	3820	11.0731	4135	11.073	3060	11.073	3968	11.0731	3398			11.0731	3205	11.0731	4234	11.0731	3969	11.0731	3413	11.073	5911	11.0731	6341			11.0729	3111	11.0729	5479	11.0729	3583	11.0729	3133	11.0729	4439	11.0732	5415
11.0795	2934	11.0795	4546	11.0795	4948	11.0794	3483	11.0794	3415	11.0795	3278			11.0795	3039	11.0796	4507	11.0795	3756	11.0796	2870	11.0794	5435	11.0796	5025			11.0794	3477	11.0794	4759	11.0793	3591	11.0793	3326	11.0793	4003	11.0796	5521
11.086	2754	11.0859	4060	11.086	4818	11.0859	2587	11.0859	3800	11.086	2924			11.086	3497	11.0861	4150	11.086	3876	11.0861	3249	11.0859	5884	11.0861	5082			11.0859	3439	11.0859	5247	11.0858	4311	11.0858	3325	11.0858	5425	11.0861	5639
11.0925	2892	11.0924	3811	11.0925	4291	11.0923	3176	11.0924	3962	11.0925	3212			11.0925	3284	11.0925	4488	11.0925	2996	11.0925	2707	11.0924	5243	11.0925	5411			11.0923	2926	11.0923	4604	11.0923	4028	11.0923	2998	11.0923	4636	11.0925	4719
11.0989	2939	11.0989	4585	11.099	3625	11.0988	3009	11.0989	3294	11.099	3630			11.0989	3584	11.099	4608	11.0989	3943	11.099	3380	11.0989	4661	11.099	5087			11.0988	3125	11.0988	5057	11.0988	3430	11.0987	3643	11.0987	4764	11.099	5092
11.1054	3004	11.1053	4301	11.1054	4120	11.1053	2954	11.1053	3438	11.1054	3018			11.1054	3335	11.1055	4174	11.1054	4001	11.1055	3019	11.1053	5385	11.1055	4975			11.1052	3299	11.1053	5021	11.1052	3291	11.1052	4030	11.1052	4802	11.1055	5781
11.1119	3358	11.1118	3785	11.1119	4002	11.1118	3243	11.1118	3517	11.1119	3277			11.1119	3205	11.1119	4489	11.1119	3395	11.112	2974	11.1118	5232	11.112	5685			11.1117	3249	11.1118	5271	11.1117	4409	11.1117	3399	11.1117	4988	11.112	6632
11.1183	3099	11.1183	3760	11.1183	4511	11.1182	2838	11.1183	4393	11.1184	3713			11.1183	3265	11.1184	4690	11.1183	4399	11.1184	3233	11.1183	5701	11.1184	5683			11.1182	3322	11.1182	4385	11.1181	3923	11.1181	3776	11.1181	4782	11.1184	5082
11.1248	3194	11.1248	4275	11.1248	5472	11.1247	3163	11.1247	4139	11.1248	3741			11.1248	2511	11.1249	4681	11.1248	3932	11.1249	3391	11.1247	5649	11.1249	6337			11.1247	3133	11.1247	4501	11.1246	4049	11.1246	3921	11.1246	6105	11.1249	5387
11.1313	3400	11.1312	5679	11.1313	6319	11.1312	4166	11.1312	6139	11.1313	4541			11.1313	3745	11.1313	5230	11.1313	4609	11.1313	3214	11.1312	7857	11.1313	6830			11.1311	3916	11.1311	5030	11.1311	3920	11.1311	3582	11.1311	5581	11.1314	5521
11.1378	3237	11.1377	5445	11.1378	8322	11.1376	4833	11.1377	7660	11.1378	4612			11.1378	4000	11.1378	6433	11.1378	5317	11.1378	3751	11.1377	7334	11.1378	7069			11.1376	3218	11.1376	5544	11.1375	3550	11.1375	3423	11.1375	6980	11.1378	5305
11.1442	3938	11.1441	6169	11.1442	10085	11.1441	6615	11.1441	7109	11.1442	5499			11.1442	4136	11.1443	7906	11.1442	5973	11.1443	3983	11.1441	9887	11.1443	8249			11.1441	3669	11.1441	6027	11.144	4126	11.144	3521	11.144	6918	11.1443	5340
11.1507	4145	11.1506	6966	11.1507	11637	11.1506	6112	11.1506	8305	11.1507	7286			11.1507	5434	11.1508	7752	11.1507	8179	11.1508	4039	11.1506	11865	11.1508	8216			11.1505	3257	11.1506	5803	11.1505	4342	11.1505	3652	11.1505	7127	11.1508	6020
11.1572	4352	11.1571	7199	11.1572	13766	11.157	7689	11.1571	9871	11.1572	7428			11.1571	5729	11.1572	9147	11.1571	7435	11.1572	5181	11.1571	11632	11.1572	10108			11.157	3596	11.157	5639	11.157	4399	11.157	4201	11.157	6539	11.1572	5836
11.1636	4767	11.1636	8124	11.1636	13388	11.1635	7668	11.1636	10585	11.1637	7810			11.1636	6671	11.1637	9752	11.1636	8208	11.1637	4897	11.1636	12392	11.1637	9964			11.1635	2786	11.1635	5420	11.1634	4907	11.1634	3443	11.1634	7176	11.1637	6915
11.1701	4681	11.17	8481	11.1701	12403	11.17	7952	11.17	9642	11.1701	7551			11.1701	5307	11.1701	9097	11.1701	7776	11.1702	4638	11.17	11256	11.1702	9804			11.1699	3173	11.17	5529	11.1699	3790	11.1699	4378	11.1699	7082	11.1702	6696
11.1766	4604	11.1765	6346	11.1766	12035	11.1765	7213	11.1765	8048	11.1766	7383			11.1766	5115	11.1766	8600	11.1766	8178	11.1766	4351	11.1765	10370	11.1766	8211			11.1764	2985	11.1764	4919	11.1764	4402	11.1764	4301	11.1764	7386	11.1766	6362
11.183	3299	11.183	5917	11.183	9809	11.1829	5886	11.1829	7964	11.183	4618			11.183	5102	11.1831	6433	11.183	6410	11.1831	4232	11.1829	9113	11.1831	6995			11.1829	3232	11.1829	5341	11.1828	4268	11.1828	3909	11.1828	6278	11.1831	5597
11.1895	3096	11.1894	5876	11.1895	6978	11.1894	5257	11.1894	7394	11.1895	4522			11.1895	3955	11.1896	6489	11.1895	5378	11.1896	3483	11.1894	8518	11.1896	7156			11.1893	3219	11.1894	4292	11.1893	4336	11.1893	3752	11.1893	6817	11.1896	5069
11.196	3335	11.1959	4626	11.196	6136	11.1959	4563	11.1959	6427	11.196	3690			11.196	3519	11.196	6199	11.196	5276	11.196	3880	11.1959	6850	11.196	5448			11.1958	3517	11.1958	4540	11.1958	3967	11.1958	3651	11.1958	6146	11.196	5245
11.2024	3196	11.2024	4314	11.2025	5689	11.2023	4060	11.2023	4674	11.2025	3864			11.2024	3722	11.2025	5156	11.2024	4362	11.2025	3512	11.2023	5412	11.2025	4782			11.2023	2769	11.2023	4117	11.2022	2880	11.2022	3550	11.2022	4376	11.2025	5068
11.2089	2810	11.2088	4186	11.2089	5076	11.2088	4089	11.2088	4467	11.2089	3606			11.2089	3898	11.209	4246	11.2089	3901	11.209	2875	11.2088	5794	11.209	5030			11.2088	3248	11.2088	4288	11.2087	3695	11.2087	3271	11.2087	5302	11.209	4741
11.2154	2695	11.2153	3688	11.2154	4168	11.2152	3210	11.2153	4276	11.2154	3578			11.2154	3154	11.2154	4819	11.2154	3740	11.2155	3348	11.2153	5159	11.2155	5126			11.2152	2989	11.2152	4496	11.2152	4387	11.2152	4285	11.2152	4487	11.2155	4467
11.2218	3197	11.2218	4143	11.2218	4015	11.2217	3228	11.2218	4976	11.2219	3211			11.2218	2697	11.2219	4104	11.2218	3369	11.2219	3105	11.2218	4814	11.2219	4991			11.2217	3243	11.2217	3981	11.2217	3464	11.2217	3625	11.2217	5318	11.2219	5046
11.2283	2946	11.2282	3390	11.2283	3810	11.2282	3172	11.2282	3524	11.2283	3558			11.2283	2831	11.2284	4037	11.2283	3509	11.2284	3115	11.2282	4725	11.2284	4482			11.2281	3284	11.2282	4500	11.2281	3566	11.2281	3988	11.2281	5487	11.2284	4136
11.2348	2478	11.2347	3379	11.2348	3304	11.2347	3619	11.2347	3677	11.2348	3229			11.2348	2480	11.2348	3894	11.2348	3221	11.2348	3367	11.2347	5372	11.2348	4459			11.2346	3492	11.2347	4307	11.2346	3043	11.2346	3264	11.2346	5531	11.2348	4385
11.2413	2691	11.2412	3772	11.2413	3446	11.2411	3305	11.2412	3046	11.2413	3057			11.2413	3604	11.2413	4691	11.2413	4135	11.2413	2709	11.2412	4156	11.2413	4337			11.2411	3390	11.2411	4743	11.241	3582	11.241	3515	11.241	5042	11.2413	4783
11.2477	3205	11.2477	3455	11.2477	4365	11.2476	2987	11.2476	3130	11.2477	3220			11.2477	3315	11.2478	4143	11.2477	3246	11.2478	3035	11.2476	4719	11.2478	4049			11.2476	2951	11.2476	4656	11.2475	3273	11.2475	3876	11.2475	4275	11.2478	3667
11.2542	3738	11.2541	3324	11.2542	4010	11.2541	2819	11.2541	3584	11.2542	3189			11.2542	3031	11.2542	4596	11.2542	3454	11.2543	3329	11.2541	3959	11.2543	4261			11.254	3077	11.254	4776	11.254	3152	11.254	4007	11.254	4111	11.2543	3911
11.2607	3285	11.2606	3153	11.2607	3356	11.2605	2633	11.2606	3021	11.2607	2810			11.2607	3520	11.2607	3712	11.2607	3280	11.2607	3071	11.2606	4269	11.2607	4710			11.2605	3431	11.2605	4188	11.2605	3364	11.2605	2942	11.2605	4467	11.2607	4535
11.2671	2957	11.267	3573	11.2671	4027	11.267	2968	11.267	3110	11.2672	2884			11.2671	3106	11.2672	4136	11.2671	3622	11.2672	2759	11.267	5005	11.2672	3815			11.267	3535	11.267	3921	11.2669	3656	11.2669	3599	11.2669	3504	11.2672	4069
11.2736	3002	11.2735	3516	11.2736	3133	11.2735	2778	11.2735	3228	11.2736	2829			11.2736	2974	11.2736	4194	11.2736	3740	11.2737	3029	11.2735	4808	11.2737	4233			11.2734	3687	11.2735	3966	11.2734	3972	11.2734	3434	11.2734	4194	11.2737	4198
11.2801	3131	11.28	3313	11.2801	3564	11.2799	2829	11.28	4044	11.2801	2953			11.28	3282	11.2801	4377	11.2801	3102	11.2801	3012	11.28	4261	11.2801	4536			11.2799	3366	11.2799	4156	11.2799	3651	11.2799	3636	11.2799	4292	11.2801	4859
11.2865	3028	11.2865	3388	11.2865	3102	11.2864	3256	11.2865	3378	11.2866	3185			11.2865	3091	11.2866	3910	11.2865	3057	11.2866	3081	11.2865	3824	11.2866	4258			11.2864	2284	11.2864	3506	11.2863	3588	11.2863	3697	11.2863	4330	11.2866	4458
11.293	2764	11.2929	3747	11.293	3590	11.2929	2929	11.2929	3136	11.293	2879			11.293	3903	11.293	4169	11.293	3604	11.2931	2967	11.2929	4153	11.2931	3902			11.2928	3544	11.2929	4638	11.2928	3308	11.2928	3441	11.2928	4309	11.2931	3741
11.2995	2963	11.2994	3437	11.2995	3959	11.2994	2674	11.2994	3597	11.2995	3770			11.2995	3657	11.2995	3571	11.2995	3462	11.2995	3084	11.2994	4164	11.2995	4169			11.2993	3312	11.2993	4159	11.2993	3051	11.2993	3372	11.2993	4704	11.2995	4301
11.3059	3298	11.3059	3745	11.3059	3682	11.3058	2694	11.3058	3627	11.306	3478			11.3059	3256	11.306	4179	11.3059	3250	11.306	2911	11.3058	4903	11.306	4204			11.3058	3196	11.3058	4435	11.3057	3370	11.3057	3337	11.3057	4390	11.306	3781
11.3124	3093	11.3123	4218	11.3124	3066	11.3123	2927	11.3123	3227	11.3124	3390			11.3124	3164	11.3125	4338	11.3124	3386	11.3125	3087	11.3123	3928	11.3125	4202			11.3123	3044	11.3123	4865	11.3122	3436	11.3122	3167	11.3122	6296	11.3125	4488
11.3189	2914	11.3188	4338	11.3189	3922	11.3187	3249	11.3188	2801	11.3189	2656			11.3189	3165	11.3189	3940	11.3189	3420	11.3189	2866	11.3188	3294	11.3189	3825			11.3187	3048	11.3187	3774	11.3187	3427	11.3187	3659	11.3187	4588	11.3189	4546
11.3254	3277	11.3253	3454	11.3254	4134	11.3252	2738	11.3253	3327	11.3254	3165			11.3253	3165	11.3254	3933	11.3253	3242	11.3254	3087	11.3253	3647	11.3254	4245			11.3252	2928	11.3252	4353	11.3252	3828	11.3252	3261	11.3252	5004	11.3254	3817
11.3318	2920	11.3317	3430	11.3318	3114	11.3317	2538	11.3317	3413	11.3318	3133			11.3318	3287	11.3319	3789	11.3318	3506	11.3319	2512	11.3317	4472	11.3319	4814			11.3316	3115	11.3317	4588	11.3316	3700	11.3316	3393	11.3316	6490	11.3319	3551
11.3383	2970	11.3382	3350	11.3383	3435	11.3382	3394	11.3382	3883	11.3383	2940			11.3383	3178	11.3383	3927	11.3383	3350	11.3384	3554	11.3382	3830	11.3384	3824			11.3381	2563	11.3382	4054	11.3381	3293	11.3381	2965	11.3381	5136	11.3384	3961
11.3447	2658	11.3447	3499	11.3447	3998	11.3446	3288	11.3447	3228	11.3448	2981			11.3447	3212	11.3448	3424	11.3447	3652	11.3448	2582	11.3447	4242	11.3448	4032			11.3446	3119	11.3446	3755	11.3445	3664	11.3445	3321	11.3445	5439	11.3448	3546
11.3512	3290	11.3512	3473	11.3512	3551	11.3511	2828	11.3511	2849	11.3512	2761			11.3512	2999	11.3513	2778	11.3512	3672	11.3513	3757	11.3511	3834	11.3513	3178			11.3511	2897	11.3511	3361	11.351	3396	11.351	3600	11.351	4832	11.3513	4219
11.3577	3135	11.3576	3771	11.3577	3717	11.3576	3038	11.3576	3515	11.3577	2904			11.3577	3709	11.3577	4634	11.3577	3380	11.3577	3040	11.3576	4326	11.3577	3779			11.3575	2634	11.3575	3623	11.3575	3214	11.3575	3187	11.3575	4837	11.3578	3709
11.3642	3750	11.3641	3101	11.3642	3531	11.364	2976	11.3641	3590	11.3642	3241			11.3642	3266	11.3642	3946	11.3642	3529	11.3642	3176	11.3641	3863	11.3642	3984			11.364	2815	11.364	4269	11.364	3892	11.364	3085	11.364	5038	11.3642	3550
11.3706	2828	11.3705	3479	11.3706	3587	11.3705	2782	11.3705	3657	11.3706	2993			11.3706	2883	11.3707	4282	11.3706	2874	11.3707	2713	11.3705	4764	11.3707	3863			11.3705	3278	11.3705	3670	11.3704	3234	11.3704	3587	11.3704	4793	11.3707	3844
11.3771	3084	11.377	3637	11.3771	3546	11.377	3193	11.377	3950	11.3771	2674			11.3771	3322	11.3772	3345	11.3771	3243	11.3772	2989	11.377	3794	11.3772	3719			11.3769	3030	11.377	4426	11.3769	3342	11.3769	3777	11.3769	6362	11.3772	3641
11.3836	3116	11.3835	3257	11.3836	3695	11.3834	3676	11.3835	3408	11.3836	3442			11.3835	2956	11.3836	3151	11.3835	3148	11.3836	3314	11.3835	4554	11.3836	3686			11.3834	3696	11.3834	4873	11.3834	3850	11.3834	3813	11.3834	6113	11.3836	4196
11.39	3208	11.39	3546	11.39	3241	11.3899	3114	11.39	4506	11.3901	2980			11.39	3198	11.3901	4057	11.39	3593	11.3901	2890	11.39	4238	11.3901	3953			11.3899	3667	11.3899	4952	11.3898	3031	11.3898	3301	11.3898	6496	11.3901	4466
11.3965	2947	11.3964	3825	11.3965	3550	11.3964	3798	11.3964	4001	11.3965	2804			11.3965	2918	11.3965	4349	11.3965	2774	11.3966	3243	11.3964	4733	11.3966	3931			11.3963	3394	11.3964	5591	11.3963	3483	11.3963	3207	11.3963	8223	11.3966	3825
11.403	3471	11.4029	4316	11.403	3106	11.4029	4573	11.4029	4286	11.403	3017			11.403	3476	11.403	3723	11.403	3632	11.403	3029	11.4029	4176	11.403	3745			11.4028	3430	11.4028	4456	11.4028	3812	11.4028	3574	11.4028	7906	11.4031	4085
11.4094	3242	11.4094	3534	11.4094	3275	11.4093	3600	11.4093	4079	11.4094	2985			11.4094	2812	11.4095	3492	11.4094	3565	11.4095	2728	11.4093	4221	11.4095	3015			11.4093	3174	11.4093	4670	11.4092	3327	11.4092	4144	11.4092	6528	11.4095	4036
11.4159	2672	11.4158	3669	11.4159	3578	11.4158	3658	11.4158	3786	11.4159	2913			11.4159	3545	11.416	3483	11.4159	3085	11.416	3448	11.4158	3385	11.416	3448			11.4157	3934	11.4158	4684	11.4157	3200	11.4157	3849	11.4157	6842	11.416	3246
11.4224	3338	11.4223	3321	11.4224	3340	11.4223	3254	11.4223	3965	11.4224	3187			11.4224	2746	11.4224	4126	11.4224	3747	11.4224	2716	11.4223	4374	11.4224	3921			11.4222	3609	11.4222	4415	11.4222	3337	11.4222	3522	11.4222	6611	11.4224	4555
11.4289	3472	11.4288	3806	11.4289	3935	11.4287	2851	11.4288	3356	11.4289	2996			11.4288	3314	11.4289	3929	11.4288	3306	11.4289	3021	11.4288	4158	11.4289	3452			11.4287	3124	11.4287	4362	11.4286	4030	11.4286	3305	11.4286	5799	11.4289	3893
11.4353	2696	11.4352	3159	11.4353	3635	11.4352	2863	11.4352	2990	11.4353	2999			11.4353	3371	11.4354	3889	11.4353	3171	11.4354	2912	11.4352	3911	11.4354	2925			11.4352	2876	11.4352	3797	11.4351	3094	11.4351	3401	11.4351	4236	11.4354	3966
11.4418	3294	11.4417	2968	11.4418	2947	11.4416	2683	11.4417	3927	11.4418	3387			11.4418	3102	11.4418	3512	11.4418	3151	11.4419	2829	11.4417	3689	11.4419	3398			11.4416	2716	11.4416	3435	11.4416	3201	11.4416	3392	11.4416	4563	11.4419	4312
11.4482	2883	11.4482	3357	11.4482	3151	11.4481	2964	11.4482	2666	11.4483	2512			11.4482	3584	11.4483	4243	11.4482	3447	11.4483	2565	11.4482	3628	11.4483	3343			11.4481	2835	11.4481	4041	11.4481	3067	11.4481	2742	11.4481	4176	11.4483	3437
11.4547	3330	11.4547	3214	11.4547	3298	11.4546	2758	11.4546	2778	11.4547	2708			11.4547	3107	11.4548	3635	11.4547	3625	11.4548	3088	11.4546	3328	11.4548	3600			11.4545	3210	11.4546	3542	11.4545	3540	11.4545	2899	11.4545	3955	11.4548	3548
11.4612	3004	11.4611	3051	11.4612	3220	11.4611	3254	11.4611	3204	11.4612	3090			11.4612	3402	11.4612	3469	11.4612	3215	11.4612	3202	11.4611	4081	11.4612	4328			11.461	3223	11.4611	3385	11.461	2465	11.461	3221	11.461	4192	11.4613	4042
11.4677	3062	11.4676	3214	11.4677	3563	11.4675	3328	11.4676	3065	11.4677	2901			11.4677	3185	11.4677	3418	11.4677	3283	11.4677	3083	11.4676	4208	11.4677	4162			11.4675	2952	11.4675	4003	11.4674	3003	11.4674	3290	11.4674	4123	11.4677	4083
11.4741	3487	11.4741	3432	11.4741	3340	11.474	2545	11.474	3215	11.4741	3636			11.4741	3300	11.4742	4269	11.4741	3098	11.4742	3096	11.474	4801	11.4742	3627			11.474	2767	11.474	3706	11.4739	3005	11.4739	3240	11.4739	3356	11.4742	3821
11.4806	2650	11.4805	3505	11.4806	3200	11.4805	2700	11.4805	2873	11.4806	2991			11.4806	3398	11.4807	3590	11.4806	2777	11.4807	3201	11.4805	3652	11.4807	3597			11.4804	3167	11.4804	3712	11.4804	3232	11.4804	3210	11.4804	3323	11.4807	3815
11.4871	2890	11.487	3285	11.4871	3292	11.4869	3117	11.487	3212	11.4871	3242			11.487	3095	11.4871	3801	11.487	3209	11.4871	3406	11.487	3509	11.4871	3130			11.4869	3458	11.4869	3534	11.4869	3187	11.4869	3379	11.4869	3715	11.4871	3750
11.4935	2489	11.4934	3800	11.4935	3120	11.4934	3018	11.4934	3300	11.4936	3086			11.4935	3031	11.4936	3393	11.4935	3558	11.4936	3134	11.4934	2813	11.4936	3639			11.4934	3226	11.4934	3780	11.4933	3686	11.4933	3532	11.4933	4055	11.4936	2938
11.5	2872	11.4999	3117	11.5	2549	11.4999	3054	11.4999	3000	11.5	3315			11.5	3072	11.5	3697	11.5	2789	11.5001	3253	11.4999	3193	11.5001	3871			11.4998	3188	11.4999	4018	11.4998	3061	11.4998	3009	11.4998	4185	11.5001	4041
11.5065	2989	11.5064	3003	11.5065	3574	11.5063	2743	11.5064	2810	11.5065	2871			11.5065	3007	11.5065	3658	11.5065	3037	11.5065	3199	11.5064	3938	11.5065	3472			11.5063	2763	11.5063	3786	11.5063	3438	11.5063	3061	11.5063	3158	11.5065	4122
11.5129	2616	11.5129	3219	11.5129	3591	11.5128	3133	11.5129	2927	11.513	3017			11.5129	3107	11.513	3407	11.5129	3154	11.513	2904	11.5129	3575	11.513	3317			11.5128	3210	11.5128	3718	11.5127	3177	11.5127	3196	11.5127	3526	11.513	4046
11.5194	2933	11.5193	2719	11.5194	3357	11.5193	3173	11.5193	3097	11.5194	2913			11.5194	3526	11.5195	3754	11.5194	3291	11.5195	3046	11.5193	3768	11.5195	3454			11.5192	2974	11.5193	3384	11.5192	2985	11.5192	3320	11.5192	3821	11.5195	3458
11.5259	2918	11.5258	3858	11.5259	3040	11.5258	3194	11.5258	2765	11.5259	3426			11.5259	3002	11.5259	3368	11.5259	3103	11.5259	2836	11.5258	3688	11.5259	3210			11.5257	2913	11.5257	3835	11.5257	3182	11.5257	3425	11.5257	3756	11.5259	3316
11.5323	2850	11.5323	3282	11.5323	3132	11.5322	2990	11.5322	3324	11.5324	3142			11.5323	3208	11.5324	4223	11.5323	3342	11.5324	3001	11.5322	3867	11.5324	3496			11.5322	2933	11.5322	3747	11.5321	3500	11.5321	2684	11.5321	3197	11.5324	3389
11.5388	3130	11.5387	3327	11.5388	3518	11.5387	2869	11.5387	3096	11.5388	2956			11.5388	3508	11.5389	4341	11.5388	3485	11.5389	3142	11.5387	4374	11.5389	3722			11.5387	3197	11.5387	3936	11.5386	3521	11.5386	3322	11.5386	3544	11.5389	3245
11.5453	2873	11.5452	4117	11.5453	4437	11.5451	2530	11.5452	3695	11.5453	3131			11.5453	3393	11.5453	3984	11.5453	3899	11.5453	2849	11.5452	4519	11.5453	4885			11.5451	2952	11.5451	3505	11.5451	3202	11.5451	3128	11.5451	3658	11.5453	3113
11.5518	3286	11.5517	3944	11.5518	6862	11.5516	3506	11.5517	3931	11.5518	3742			11.5517	3132	11.5518	4111	11.5518	4490	11.5518	2899	11.5517	5711	11.5518	5260			11.5516	3308	11.5516	4029	11.5516	3036	11.5516	3089	11.5516	4818	11.5518	2909
11.5582	2473	11.5581	5474	11.5582	9525	11.5581	5493	11.5581	6257	11.5582	6116			11.5582	2950	11.5583	5884	11.5582	5350	11.5583	3339	11.5581	8220	11.5583	7489			11.558	3107	11.5581	3737	11.558	3555	11.558	2772	11.558	4398	11.5583	3738
11.5647	3584	11.5646	7808	11.5647	15415	11.5646	7525	11.5646	10066	11.5647	8943			11.5647	4117	11.5647	8892	11.5647	7323	11.5648	4002	11.5646	9928	11.5648	7925			11.5645	3364	11.5646	4023	11.5645	3600	11.5645	3219	11.5645	5069	11.5648	3826
11.5711	4443	11.5711	10617	11.5712	23526	11.571	11781	11.5711	13986	11.5712	11837			11.5711	4136	11.5712	11738	11.5711	11096	11.5712	4756	11.5711	16342	11.5712	12441			11.571	3001	11.571	4415	11.5709	4027	11.5709	3651	11.5709	5814	11.5712	4574
11.5776	4776	11.5776	14708	11.5776	32118	11.5775	15795	11.5775	19275	11.5777	17113			11.5776	5405	11.5777	14804	11.5776	15822	11.5777	5974	11.5775	19946	11.5777	15996			11.5775	2802	11.5775	5557	11.5774	5157	11.5774	3129	11.5774	6401	11.5777	5532
11.5841	6893	11.584	17801	11.5841	42410	11.584	20318	11.584	25694	11.5841	21928			11.5841	5396	11.5841	20034	11.5841	20692	11.5841	6468	11.584	25850	11.5841	21359			11.5839	2846	11.5839	5507	11.5839	5263	11.5839	3522	11.5839	8007	11.5842	6819
11.5906	7067	11.5905	19838	11.5906	49248	11.5904	23428	11.5905	29166	11.5906	24280			11.5906	5735	11.5906	21689	11.5906	23617	11.5906	8708	11.5905	29904	11.5906	23131			11.5904	2938	11.5904	5941	11.5904	6550	11.5904	4038	11.5904	9171	11.5906	7211
11.597	8283	11.5969	19931	11.597	48119	11.5969	26256	11.5969	31363	11.597	25871			11.597	6660	11.5971	24169	11.597	23307	11.5971	9296	11.5969	29523	11.5971	23856			11.5969	2799	11.5969	5640	11.5968	6194	11.5968	4063	11.5968	10009	11.5971	7595
11.6035	7558	11.6034	20520	11.6035	48511	11.6034	26112	11.6034	30138	11.6035	25058			11.6035	7357	11.6036	21441	11.6035	24952	11.6036	10140	11.6034	27823	11.6036	22275			11.6033	3385	11.6034	5982	11.6033	7072	11.6033	3846	11.6033	9532	11.6036	7604
11.61	7849	11.6099	18250	11.61	41102	11.6098	23731	11.6099	27968	11.61	22705			11.61	6664	11.61	17499	11.61	21165	11.61	9125	11.6099	27041	11.61	19484			11.6098	3657	11.6098	5958	11.6098	6739	11.6098	3779	11.6098	7980	11.61	7159
11.6164	6118	11.6164	14988	11.6164	33291	11.6163	20748	11.6164	22515	11.6165	17103			11.6164	5499	11.6165	16251	11.6164	17849	11.6165	7732	11.6164	22368	11.6165	15842			11.6163	3007	11.6163	5343	11.6162	5673	11.6162	4049	11.6162	8294	11.6165	7215
11.6229	5963	11.6228	10767	11.6229	24456	11.6228	15486	11.6228	17615	11.6229	13565			11.6229	5805	11.6229	12160	11.6229	14047	11.623	6863	11.6228	17041	11.623	11777			11.6227	3011	11.6228	5111	11.6227	5420	11.6227	2988	11.6227	6605	11.623	5910
11.6294	4657	11.6293	7970	11.6294	17842	11.6293	11764	11.6293	13117	11.6294	10401			11.6294	5079	11.6294	8943	11.6294	10510	11.6294	4935	11.6293	12579	11.6294	10083			11.6292	3331	11.6292	4029	11.6292	4132	11.6292	3366	11.6292	6141	11.6295	5240
11.6358	3495	11.6358	6430	11.6358	12365	11.6357	8223	11.6357	9764	11.6359	7598			11.6358	3691	11.6359	7153	11.6358	7118	11.6359	4207	11.6357	9411	11.6359	6690			11.6357	2706	11.6357	3401	11.6356	3999	11.6356	3156	11.6356	6053	11.6359	4049
11.6423	3210	11.6422	5044	11.6423	8926	11.6422	6485	11.6422	6894	11.6423	6068			11.6423	3419	11.6424	5869	11.6423	6257	11.6424	3346	11.6422	7030	11.6424	4956			11.6422	2979	11.6422	3978	11.6421	3846	11.6421	2756	11.6421	5526	11.6424	4215
11.6488	3181	11.6487	4319	11.6488	6845	11.6486	4864	11.6487	5641	11.6488	4582			11.6488	3511	11.6488	5021	11.6488	4005	11.6488	3452	11.6487	6075	11.6488	5109			11.6486	3564	11.6486	4162	11.6486	3801	11.6486	3071	11.6486	4308	11.6488	4424
11.6553	3344	11.6552	3709	11.6553	5522	11.6551	4406	11.6552	4772	11.6553	3697			11.6552	3209	11.6553	4699	11.6552	4443	11.6553	3667	11.6552	4854	11.6553	3610			11.6551	2654	11.6551	4134	11.655	2638	11.655	2870	11.655	4114	11.6553	3422
11.6617	3126	11.6616	4123	11.6617	5273	11.6616	3342	11.6616	4295	11.6617	3544			11.6617	3355	11.6618	4278	11.6617	3379	11.6618	3213	11.6616	4957	11.6618	3464			11.6616	3057	11.6616	4557	11.6615	3953	11.6615	3760	11.6615	3634	11.6618	3512
11.6682	3298	11.6681	3361	11.6682	4933	11.6681	3825	11.6681	3606	11.6682	3093			11.6682	2971	11.6682	4438	11.6682	3636	11.6683	3163	11.6681	3993	11.6683	3509			11.668	2529	11.668	4570	11.668	3229	11.668	2896	11.668	3845	11.6683	3516
11.6746	3432	11.6746	4270	11.6746	4112	11.6745	3587	11.6746	4326	11.6747	3394			11.6746	3205	11.6747	3876	11.6746	3755	11.6747	3321	11.6746	3869	11.6747	3613			11.6745	3115	11.6745	3041	11.6745	3822	11.6745	2749	11.6745	2825	11.6747	3379
11.6811	3294	11.6811	3096	11.6811	3900	11.681	3495	11.681	4002	11.6811	2847			11.6811	3156	11.6812	3473	11.6811	3337	11.6812	2501	11.681	4255	11.6812	3845			11.6809	3027	11.681	3428	11.6809	2689	11.6809	3250	11.6809	3926	11.6812	3854
11.6876	2978	11.6875	3399	11.6876	3683	11.6875	2899	11.6875	3941	11.6876	3519			11.6876	3000	11.6876	3130	11.6876	4108	11.6876	2603	11.6875	4034	11.6876	3100			11.6874	2822	11.6875	3206	11.6874	3289	11.6874	2974	11.6874	3393	11.6877	3444
11.6941	3287	11.694	3560	11.6941	3938	11.6939	3047	11.694	3898	11.6941	3213			11.6941	3150	11.6941	3557	11.6941	3805	11.6941	2780	11.694	4025	11.6941	3434			11.6939	3250	11.6939	3180	11.6938	3095	11.6938	3237	11.6938	3674	11.6941	3108
11.7005	3272	11.7005	3437	11.7005	3825	11.7004	2183	11.7004	3291	11.7005	3246			11.7005	3384	11.7006	3313	11.7005	3400	11.7006	3049	11.7004	3846	11.7006	3623			11.7004	2996	11.7004	3309	11.7003	3471	11.7003	3123	11.7003	3988	11.7006	3003
11.707	3377	11.7069	3091	11.707	3386	11.7069	3390	11.7069	4157	11.707	2888			11.707	3299	11.7071	3276	11.707	3541	11.7071	3512	11.7069	4290	11.7071	3531			11.7068	3022	11.7069	3346	11.7068	3499	11.7068	3111	11.7068	4430	11.7071	3288
11.7135	3324	11.7134	3666	11.7135	3345	11.7133	2747	11.7134	4618	11.7135	2640			11.7134	3565	11.7135	3696	11.7134	3226	11.7135	2822	11.7134	3909	11.7135	3670			11.7133	2621	11.7133	3369	11.7133	2958	11.7133	3133	11.7133	4373	11.7135	3050
11.7199	3332	11.7198	3334	11.7199	3435	11.7198	2956	11.7198	4099	11.72	2492			11.7199	3029	11.72	3780	11.7199	3247	11.72	2621	11.7198	4139	11.72	3169			11.7198	3278	11.7198	3320	11.7197	3099	11.7197	3127	11.7197	3856	11.72	3318
11.7264	3716	11.7263	2984	11.7264	3296	11.7263	2930	11.7263	4363	11.7264	3296			11.7264	2995	11.7264	3425	11.7264	3288	11.7265	3198	11.7263	4259	11.7265	3343			11.7262	3280	11.7263	3389	11.7262	3033	11.7262	2791	11.7262	4995	11.7265	3185
11.7329	3536	11.7328	3037	11.7329	3011	11.7327	2538	11.7328	4538	11.7329	2645			11.7329	3811	11.7329	3694	11.7329	3126	11.7329	3118	11.7328	3834	11.7329	3390			11.7327	2673	11.7327	3282	11.7327	3803	11.7327	3042	11.7327	4670	11.733	3208
11.7393	3761	11.7393	3220	11.7393	2861	11.7392	2562	11.7393	4177	11.7393	3108			11.7393	3798	11.7394	3342	11.7393	3212	11.7394	3373	11.7393	3328	11.7394	3638			11.7392	2953	11.7392	3251	11.7391	2956	11.7391	2978	11.7391	4556	11.7394	2980
11.7458	3564	11.7457	3455	11.7458	3148	11.7457	2858	11.7457	5203	11.7458	3417			11.7458	3488	11.7459	3238	11.7458	3030	11.7459	3409	11.7457	3551	11.7459	3312			11.7456	3204	11.7457	3344	11.7456	3803	11.7456	3082	11.7456	4235	11.7459	3571
11.7523	3165	11.7522	3383	11.7523	2953	11.7522	3167	11.7522	3914	11.7523	3186			11.7523	3458	11.7523	3740	11.7523	3273	11.7523	2896	11.7522	4169	11.7523	2673			11.7521	3268	11.7521	3236	11.7521	3417	11.7521	3043	11.7521	4613	11.7523	3300
11.7587	3249	11.7587	3318	11.7587	3474	11.7586	2780	11.7586	3803	11.7588	2522			11.7587	3555	11.7588	3126	11.7587	3045	11.7588	2740	11.7586	3956	11.7588	3715			11.7586	3265	11.7586	2986	11.7585	3102	11.7585	2937	11.7585	4216	11.7588	3249
11.7652	3199	11.7651	3408	11.7652	2843	11.7651	3194	11.7651	4118	11.7652	2938			11.7652	3218	11.7653	3502	11.7652	3045	11.7653	3036	11.7651	3890	11.7653	3193			11.7651	3135	11.7651	3942	11.765	3427	11.765	2927	11.765	3879	11.7653	3196
11.7717	2755	11.7716	3533	11.7717	3360	11.7715	2493	11.7716	3240	11.7717	2753			11.7717	2957	11.7717	3165	11.7717	2907	11.7718	2799	11.7716	3616	11.7718	2947			11.7715	3028	11.7715	2938	11.7715	3092	11.7715	2816	11.7715	4065	11.7718	3455
11.7782	3573	11.7781	3340	11.7782	3730	11.778	3011	11.7781	3226	11.7782	3004			11.7782	3029	11.7782	3575	11.7782	3521	11.7782	3063	11.7781	3416	11.7782	3675			11.778	2750	11.778	3278	11.778	3541	11.778	2657	11.778	3093	11.7782	3036
11.7846	2853	11.7845	3565	11.7846	3213	11.7845	3076	11.7845	3413	11.7846	3311			11.7846	3159	11.7847	2998	11.7846	3336	11.7847	3449	11.7845	4445	11.7847	3079			11.7844	3056	11.7845	3419	11.7844	2995	11.7844	2705	11.7844	4050	11.7847	3011
11.7911	2802	11.791	3121	11.7911	3061	11.791	2953	11.791	3597	11.7911	2802			11.7911	3485	11.7911	3556	11.7911	3179	11.7912	2965	11.791	3406	11.7912	3230			11.7909	3058	11.791	3089	11.7909	2824	11.7909	2574	11.7909	3779	11.7912	3455
11.7975	3983	11.7975	3391	11.7976	3047	11.7974	3284	11.7975	3896	11.7976	3238			11.7975	3220	11.7976	3530	11.7975	3362	11.7976	3123	11.7975	3567	11.7976	2865			11.7974	2998	11.7974	2641	11.7973	3397	11.7973	2763	11.7973	3631	11.7976	3120
11.804	3132	11.804	3535	11.804	3421	11.8039	3207	11.8039	3681	11.8041	3028			11.804	3628	11.8041	3332	11.804	3170	11.8041	2885	11.8039	3968	11.8041	3318			11.8039	2812	11.8039	2879	11.8038	3238	11.8038	3087	11.8038	3824	11.8041	2789
11.8105	2980	11.8104	3300	11.8105	3089	11.8104	2969	11.8104	3582	11.8105	2869			11.8105	3443	11.8105	3405	11.8105	3324	11.8106	3080	11.8104	3650	11.8106	2896			11.8103	3001	11.8103	2782	11.8103	2997	11.8103	2992	11.8103	3926	11.8106	2662
11.817	3064	11.8169	3498	11.817	3248	11.8168	3173	11.8169	3736	11.817	3198			11.817	3139	11.817	3637	11.817	3031	11.817	2836	11.8169	3397	11.817	3341			11.8168	3242	11.8168	3130	11.8168	3370	11.8168	2993	11.8168	3375	11.817	2812
11.8234	2704	11.8233	3072	11.8234	3408	11.8233	3038	11.8233	3722	11.8234	2756			11.8234	3007	11.8235	3574	11.8234	3276	11.8235	3193	11.8233	3182	11.8235	2981			11.8233	2790	11.8233	3614	11.8232	3486	11.8232	3210	11.8232	3348	11.8235	3297
11.8299	2816	11.8298	3092	11.8299	3049	11.8298	2805	11.8298	3208	11.8299	2835			11.8299	2939	11.83	3186	11.8299	3384	11.83	2911	11.8298	3570	11.83	2939			11.8297	3023	11.8298	3625	11.8297	3509	11.8297	3184	11.8297	3477	11.83	3198
11.8364	2728	11.8363	3396	11.8364	3527	11.8362	2741	11.8363	2986	11.8364	2855			11.8364	3331	11.8364	3393	11.8364	3026	11.8364	2990	11.8363	2977	11.8364	2840			11.8362	3099	11.8362	2712	11.8362	3428	11.8362	2927	11.8362	3034	11.8364	3242
11.8428	2817	11.8428	3136	11.8428	2945	11.8427	2758	11.8428	3287	11.8429	3331			11.8428	3783	11.8429	3384	11.8428	3161	11.8429	2871	11.8428	2800	11.8429	3243			11.8427	3102	11.8427	2826	11.8426	3255	11.8426	3168	11.8426	3206	11.8429	3224
11.8493	2881	11.8492	3349	11.8493	3121	11.8492	2900	11.8492	2422	11.8493	2799			11.8493	2830	11.8493	3259	11.8493	3456	11.8494	2757	11.8492	3429	11.8494	3117			11.8491	2807	11.8492	3544	11.8491	3033	11.8491	2896	11.8491	2778	11.8494	3193
11.8558	3131	11.8557	3631	11.8558	2811	11.8557	2784	11.8557	2702	11.8558	3154			11.8558	3677	11.8558	3279	11.8558	2972	11.8558	3001	11.8557	2534	11.8558	2950			11.8556	3194	11.8556	3066	11.8556	3151	11.8556	2710	11.8556	3089	11.8559	3130
11.8622	3022	11.8622	3389	11.8622	3073	11.8621	2982	11.8621	2993	11.8623	2906			11.8622	3214	11.8623	3493	11.8622	3426	11.8623	3348	11.8621	3480	11.8623	3260			11.8621	3027	11.8621	3101	11.862	3299	11.862	3050	11.862	3205	11.8623	3615
11.8687	2704	11.8686	2888	11.8687	3083	11.8686	3033	11.8686	3070	11.8687	3089			11.8687	3447	11.8688	3470	11.8687	2950	11.8688	3253	11.8686	3133	11.8688	3347			11.8686	3140	11.8686	3062	11.8685	3364	11.8685	2592	11.8685	3027	11.8688	3093
11.8752	2769	11.8751	2955	11.8752	3139	11.875	3072	11.8751	3129	11.8752	2720			11.8752	3940	11.8752	3360	11.8752	2955	11.8752	2619	11.8751	3225	11.8752	3360			11.875	3073	11.875	3263	11.875	3194	11.875	3170	11.875	3324	11.8752	3467
11.8817	2908	11.8816	3069	11.8817	2770	11.8815	3270	11.8816	2569	11.8817	2931			11.8816	3220	11.8817	3376	11.8817	3670	11.8817	3367	11.8816	3098	11.8817	3167			11.8815	2906	11.8815	3435	11.8814	3126	11.8814	2890	11.8814	3567	11.8817	2702
11.8881	2361	11.888	3071	11.8881	3321	11.888	3091	11.888	3259	11.8881	3402			11.8881	3226	11.8882	3843	11.8881	3437	11.8882	2543	11.888	3635	11.8882	2990			11.888	2918	11.888	3528	11.8879	3073	11.8879	2877	11.8879	2547	11.8882	3382
11.8946	2825	11.8945	3527	11.8946	3648	11.8945	2800	11.8945	2815	11.8946	2851			11.8946	3086	11.8946	3365	11.8946	3436	11.8947	3018	11.8945	3444	11.8947	2866			11.8944	3478	11.8945	3135	11.8944	3293	11.8944	3035	11.8944	2753	11.8947	3066
11.901	3191	11.901	3085	11.9011	3001	11.9009	3024	11.901	3319	11.9011	2941			11.901	3076	11.9011	2821	11.901	2602	11.9011	2922	11.901	3376	11.9011	3449			11.9009	3129	11.9009	3514	11.9009	3661	11.9009	2838	11.9009	2769	11.9011	3139
11.9075	2890	11.9075	3142	11.9075	2908	11.9074	2509	11.9074	2745	11.9076	3372			11.9075	3089	11.9076	3276	11.9075	3711	11.9076	3138	11.9074	3090	11.9076	3457			11.9074	3613	11.9074	3798	11.9073	3049	11.9073	3356	11.9073	3657	11.9076	3004
11.914	2729	11.9139	2910	11.914	3254	11.9139	2561	11.9139	3492	11.914	2606			11.914	3169	11.914	3713	11.914	3464	11.914	3150	11.9139	2930	11.914	3485			11.9138	2678	11.9139	2650	11.9138	3073	11.9138	2946	11.9138	3316	11.9141	2762
11.9205	3233	11.9204	2734	11.9205	3259	11.9203	3321	11.9204	3112	11.9205	3272			11.9205	2948	11.9205	3186	11.9205	3909	11.9205	3307	11.9204	2842	11.9205	3224			11.9203	3089	11.9203	3061	11.9203	3092	11.9202	2801	11.9202	2651	11.9205	3219
11.9269	3085	11.9268	2752	11.9269	4068	11.9268	2734	11.9268	2908	11.9269	3542			11.9269	3551	11.927	4406	11.9269	3346	11.927	3114	11.9268	3513	11.927	3629			11.9268	3476	11.9268	3060	11.9267	3193	11.9267	2986	11.9267	3652	11.927	2748
11.9334	3030	11.9333	4207	11.9334	6105	11.9333	4211	11.9333	5165	11.9334	4279			11.9334	3057	11.9335	5872	11.9334	5322	11.9335	3581	11.9333	5448	11.9335	5876			11.9332	2825	11.9333	3457	11.9332	3989	11.9332	3080	11.9332	4829	11.9335	4270
11.9399	4620	11.9398	8765	11.9399	13693	11.9397	7297	11.9398	7247	11.9399	8084			11.9399	4541	11.9399	11860	11.9399	9713	11.9399	4914	11.9398	12644	11.9399	12030			11.9397	3025	11.9397	6420	11.9397	6198	11.9397	4422	11.9397	7476	11.9399	7422
11.9463	8976	11.9463	17567	11.9463	32492	11.9462	16936	11.9462	20822	11.9464	18520			11.9463	8110	11.9464	28103	11.9463	22338	11.9464	11865	11.9462	27564	11.9464	28014			11.9462	3394	11.9462	12471	11.9461	13689	11.9461	7515	11.9461	18984	11.9464	17326
11.9528	15650	11.9527	41344	11.9528	73823	11.9527	43900	11.9527	44736	11.9528	42699			11.9528	17860	11.9528	64108	11.9528	52735	11.9529	26492	11.9527	67926	11.9529	66853			11.9526	5846	11.9527	29606	11.9526	33478	11.9526	15856	11.9526	40856	11.9529	39732
11.9593	34886	11.9592	87334	11.9593	172276	11.9591	97193	11.9592	102230	11.9593	92501			11.9593	39169	11.9593	144158	11.9593	121490	11.9593	59440	11.9592	158307	11.9593	147122			11.9591	9875	11.9591	60312	11.9591	74355	11.9591	33861	11.9591	94048	11.9594	91877
11.9657	72429	11.9657	177455	11.9657	346595	11.9656	203312	11.9657	207314	11.9658	192862			11.9657	76702	11.9658	294704	11.9657	245169	11.9658	117707	11.9657	328350	11.9658	299342			11.9656	18692	11.9656	121744	11.9655	158900	11.9655	70496	11.9655	186790	11.9658	188611
11.9722	128204	11.9721	320546	11.9722	632458	11.9721	382449	11.9721	393865	11.9722	352308			11.9722	140497	11.9723	540172	11.9722	451745	11.9723	222512	11.9721	615560	11.9723	550529			11.972	34998	11.9721	222362	11.972	306100	11.972	132073	11.972	354042	11.9723	349634
11.9787	213931	11.9786	529306	11.9787	1041911	11.9786	636757	11.9786	649915	11.9787	575407			11.9787	238351	11.9787	895142	11.9787	750643	11.9787	384892	11.9786	1035886	11.9787	891269			11.9785	58780	11.9786	364397	11.9785	523194	11.9785	231900	11.9785	578174	11.9787	582419
11.9852	316335	11.9851	781941	11.9852	1545326	11.985	975286	11.9851	984247	11.9852	859172			11.9851	365710	11.9852	1338845	11.9851	1146263	11.9852	583220	11.9851	1554641	11.9852	1322663			11.985	95657	11.985	544538	11.9849	822988	11.9849	352860	11.9849	881110	11.9852	856674
11.9916	424407	11.9915	1034155	11.9916	2116918	11.9915	1310533	11.9915	1340004	11.9916	1176684			11.9916	494217	11.9917	1805756	11.9916	1609530	11.9917	802361	11.9915	2156616	11.9917	1767561			11.9915	132432	11.9915	746565	11.9914	1148604	11.9914	493415	11.9914	1217510	11.9917	1161391
11.9981	509181	11.998	1247474	11.9981	2622706	11.998	1621240	11.998	1654083	11.9981	1427324			11.9981	605336	11.9981	2195188	11.9981	2013282	11.9982	995354	11.998	2736943	11.9982	2149243			11.9979	169891	11.9979	908114	11.9979	1454758	11.9979	610542	11.9979	1487503	11.9982	1441515
12.0046	554629	12.0045	1321009	12.0046	2985866	12.0044	1843872	12.0045	1825080	12.0046	1573903			12.0046	671660	12.0046	2411520	12.0046	2318406	12.0046	1104542	12.0045	3178439	12.0046	2371427			12.0044	203082	12.0044	974244	12.0044	1641098	12.0044	679853	12.0044	1656919	12.0046	1611422
12.011	534182	12.0109	1283795	12.011	3131205	12.0109	1886582	12.0109	1846305	12.011	1536545			12.011	671985	12.0111	2429221	12.011	2404856	12.0111	1107988	12.0109	3394498	12.0111	2402526			12.0108	216438	12.0109	975954	12.0108	1700840	12.0108	684801	12.0108	1679971	12.0111	1646457
12.0175	474773	12.0174	1130495	12.0175	2942703	12.0174	1715771	12.0174	1677911	12.0175	1382100			12.0175	604174	12.0175	2187754	12.0175	2223168	12.0175	1012292	12.0174	3275866	12.0175	2156327			12.0173	202298	12.0174	878558	12.0173	1598059	12.0173	623635	12.0173	1555195	12.0176	1505226
12.0239	384592	12.0239	905364	12.024	2436577	12.0238	1380462	12.0239	1377126	12.024	1097583			12.0239	495033	12.024	1759792	12.0239	1872676	12.024	816997	12.0239	2868157	12.024	1735529			12.0238	173726	12.0238	715290	12.0237	1338742	12.0237	520659	12.0237	1277048	12.024	1254229
12.0304	281253	12.0304	636673	12.0304	1806886	12.0303	1003973	12.0303	1023746	12.0305	779128			12.0304	363962	12.0305	1275052	12.0304	1385507	12.0305	603929	12.0303	2225401	12.0305	1278558			12.0303	138592	12.0303	528616	12.0302	1005695	12.0302	388762	12.0302	958505	12.0305	922867
12.0369	190419	12.0368	409064	12.0369	1192227	12.0368	657140	12.0368	682134	12.0369	520142			12.0369	243883	12.0369	837152	12.0369	922474	12.037	415371	12.0368	1525471	12.037	820944			12.0367	102420	12.0368	362779	12.0367	696654	12.0367	266678	12.0367	660761	12.037	638348
12.0434	118193	12.0433	241463	12.0434	712938	12.0432	406156	12.0433	417960	12.0434	314174			12.0434	152472	12.0434	506356	12.0434	568343	12.0434	251701	12.0433	936668	12.0434	495378			12.0432	69481	12.0432	235816	12.0432	434014	12.0432	166776	12.0432	416699	12.0434	394710
12.0498	67749	12.0497	133798	12.0498	380931	12.0497	225362	12.0497	234445	12.0498	174795			12.0498	88170	12.0499	275042	12.0498	317964	12.0499	144186	12.0497	509633	12.0499	277071			12.0497	44683	12.0497	137674	12.0496	256370	12.0496	99660	12.0496	245070	12.0499	225839
12.0563	37497	12.0562	74163	12.0563	197205	12.0562	122863	12.0562	124552	12.0563	92716			12.0563	50605	12.0564	145728	12.0563	162952	12.0564	77125	12.0562	257864	12.0564	138741			12.0561	28519	12.0562	78519	12.0561	141290	12.0561	56416	12.0561	136075	12.0564	130468
12.0628	22169	12.0627	38216	12.0628	95211	12.0626	64024	12.0627	63838	12.0628	47704			12.0628	26387	12.0628	72126	12.0628	81380	12.0628	40416	12.0627	128102	12.0628	69662			12.0626	18882	12.0626	44446	12.0626	71914	12.0626	28984	12.0626	75347	12.0628	72834
12.0692	12942	12.0692	21385	12.0693	50050	12.0691	33502	12.0692	33804	12.0693	26129			12.0692	15010	12.0693	37550	12.0692	40751	12.0693	21213	12.0692	63446	12.0693	34113			12.0691	12632	12.0691	27334	12.069	39847	12.069	18502	12.069	42876	12.0693	39735
12.0757	9182	12.0756	13590	12.0757	26397	12.0756	19932	12.0756	19587	12.0757	17149			12.0757	10985	12.0758	21174	12.0757	23440	12.0758	13684	12.0756	31775	12.0758	18543			12.0755	9875	12.0756	18575	12.0755	21368	12.0755	11471	12.0755	28930	12.0758	24248
12.0822	7215	12.0821	11045	12.0822	17442	12.0821	13356	12.0821	12562	12.0822	11474			12.0822	7844	12.0822	14349	12.0822	15453	12.0823	9280	12.0821	20214	12.0823	12827			12.082	7285	12.082	11969	12.082	15677	12.082	8263	12.082	20842	12.0823	17410
12.0886	7847	12.0886	7834	12.0886	12671	12.0885	10052	12.0886	12497	12.0887	8365			12.0886	6597	12.0887	10832	12.0886	11545	12.0887	8026	12.0886	14002	12.0887	9089			12.0885	6066	12.0885	11077	12.0884	11708	12.0884	6384	12.0884	16829	12.0887	12982
12.0951	6772	12.095	6829	12.0951	10605	12.095	8605	12.095	10556	12.0951	7436			12.0951	5725	12.0952	9786	12.0951	9241	12.0952	6514	12.095	13081	12.0952	7365			12.095	5192	12.095	9156	12.0949	8400	12.0949	5312	12.0949	14303	12.0952	11450
12.1016	6766	12.1015	6213	12.1016	8556	12.1014	7602	12.1015	11938	12.1016	6823			12.1016	6150	12.1016	9291	12.1016	8672	12.1016	5970	12.1015	11712	12.1016	7318			12.1014	4523	12.1014	7908	12.1014	8436	12.1014	5217	12.1014	13432	12.1016	9622
12.1081	7122	12.108	6700	12.1081	7927	12.1079	6512	12.108	12593	12.1081	6644			12.1081	6493	12.1081	8625	12.1081	7376	12.1081	5754	12.108	11767	12.1081	7044			12.1079	5583	12.1079	7278	12.1078	6972	12.1078	4464	12.1078	13939	12.1081	8971
12.1145	7916	12.1144	7022	12.1145	9374	12.1144	6292	12.1144	14700	12.1145	5579			12.1145	7010	12.1146	6760	12.1145	7348	12.1146	5295	12.1144	11772	12.1146	6364			12.1143	5412	12.1144	6504	12.1143	6789	12.1143	5103	12.1143	13721	12.1146	7071
12.121	8400	12.1209	6947	12.121	8054	12.1209	6359	12.1209	14950	12.121	5611			12.121	6061	12.121	6943	12.121	6467	12.1211	4666	12.1209	9871	12.1211	5005			12.1208	5206	12.1209	7148	12.1208	6388	12.1208	4402	12.1208	13308	12.1211	8183
12.1274	7025	12.1274	5721	12.1275	7005	12.1273	5740	12.1274	13390	12.1275	5280			12.1274	5269	12.1275	6762	12.1274	5958	12.1275	4237	12.1274	10695	12.1275	5545			12.1273	5638	12.1273	6417	12.1273	6640	12.1273	5035	12.1273	11893	12.1275	7252
12.1339	6751	12.1339	5288	12.1339	7587	12.1338	5255	12.1338	12211	12.134	5132			12.1339	5789	12.134	6495	12.1339	5792	12.134	3817	12.1338	9508	12.134	5281			12.1338	4578	12.1338	5886	12.1337	5868	12.1337	3663	12.1337	11232	12.134	7046
12.1404	6001	12.1403	5300	12.1404	6412	12.1403	5012	12.1403	10720	12.1404	4798			12.1404	5050	12.1404	6222	12.1404	5634	12.1405	4471	12.1403	9114	12.1405	4699			12.1402	4621	12.1402	5773	12.1402	5848	12.1402	4667	12.1402	10006	12.1405	5766
12.1469	5444	12.1468	5359	12.1469	6709	12.1467	5572	12.1468	8187	12.1469	4056			12.1469	4378	12.1469	5691	12.1469	5074	12.1469	3539	12.1468	7704	12.1469	5161			12.1467	4374	12.1467	5621	12.1467	4770	12.1467	3640	12.1467	8760	12.1469	5874
12.1533	3925	12.1532	4545	12.1533	6117	12.1532	4593	12.1532	7180	12.1533	3951			12.1533	4190	12.1534	5484	12.1533	5189	12.1534	3661	12.1532	7749	12.1534	4970			12.1532	4038	12.1532	5185	12.1531	5529	12.1531	3606	12.1531	7937	12.1534	6008
12.1598	3231	12.1597	3892	12.1598	5768	12.1597	4234	12.1597	5989	12.1598	4694			12.1598	4302	12.1599	5184	12.1598	4997	12.1599	3826	12.1597	5640	12.1599	4753			12.1596	3056	12.1597	4380	12.1596	4972	12.1596	3779	12.1596	6083	12.1599	4984
12.1663	3345	12.1662	3999	12.1663	5365	12.1662	3647	12.1662	5730	12.1663	3627			12.1663	3424	12.1663	4358	12.1663	4637	12.1663	3738	12.1662	5884	12.1663	3908			12.1661	3728	12.1661	5117	12.1661	4635	12.1661	3942	12.1661	5865	12.1663	5287
12.1727	3997	12.1727	3931	12.1728	5520	12.1726	4041	12.1727	4931	12.1728	3744			12.1727	3415	12.1728	5265	12.1727	4226	12.1728	4371	12.1727	4873	12.1728	5381			12.1726	3026	12.1726	4088	12.1725	4544	12.1725	3008	12.1725	5283	12.1728	5353
12.1792	3159	12.1791	4098	12.1792	4948	12.1791	4141	12.1791	4049	12.1792	3888			12.1792	3362	12.1792	4763	12.1792	4164	12.1793	3028	12.1791	5422	12.1793	4265			12.1791	2876	12.1791	4660	12.179	4190	12.179	3449	12.179	5065	12.1793	5203
12.1857	3092	12.1856	3441	12.1857	4425	12.1855	3653	12.1856	3998	12.1857	3633			12.1857	3178	12.1857	4318	12.1857	3972	12.1857	3506	12.1856	5986	12.1857	4274			12.1855	3334	12.1855	4344	12.1855	4159	12.1855	3710	12.1855	4465	12.1858	4737
12.1921	3349	12.1921	4326	12.1921	5486	12.192	3994	12.1921	3960	12.1922	3375			12.1921	3361	12.1922	3916	12.1921	4197	12.1922	3329	12.1921	4930	12.1922	4801			12.192	2762	12.192	4771	12.1919	4136	12.1919	4097	12.1919	4896	12.1922	4077
12.1986	2755	12.1985	3990	12.1986	5243	12.1985	3802	12.1985	3678	12.1986	3744			12.1986	3678	12.1987	4933	12.1986	4921	12.1987	3378	12.1985	4363	12.1987	4070			12.1984	3763	12.1985	4149	12.1984	3338	12.1984	3309	12.1984	4944	12.1987	4581
12.2051	3083	12.205	3520	12.2051	4669	12.205	4263	12.205	3232	12.2051	3740			12.2051	3531	12.2051	4627	12.2051	4600	12.2051	3348	12.205	5480	12.2051	3705			12.2049	3065	12.205	4035	12.2049	3485	12.2049	3393	12.2049	3827	12.2051	4231
12.2116	2965	12.2115	4726	12.2116	5451	12.2114	3426	12.2115	3923	12.2116	3481			12.2116	3387	12.2116	4151	12.2116	4081	12.2116	3304	12.2115	4141	12.2116	3723			12.2114	3062	12.2114	4174	12.2113	4725	12.2113	3163	12.2113	4022	12.2116	3934
12.218	2633	12.2179	3921	12.218	4328	12.2179	3520	12.2179	3839	12.218	3472			12.218	3073	12.2181	4289	12.218	4162	12.2181	4101	12.2179	4498	12.2181	4035			12.2179	2899	12.2179	3915	12.2178	4557	12.2178	3440	12.2178	4100	12.2181	4050
12.2245	3444	12.2244	3849	12.2245	4300	12.2244	3854	12.2244	4401	12.2245	3418			12.2245	3267	12.2245	3998	12.2245	4101	12.2246	3009	12.2244	4411	12.2246	3853			12.2243	3062	12.2243	3674	12.2243	3948	12.2243	2927	12.2243	4226	12.2246	3838
12.2309	3111	12.2309	4080	12.231	4485	12.2308	3414	12.2309	4237	12.231	3662			12.2309	3820	12.231	4252	12.2309	3843	12.231	3391	12.2309	4546	12.231	3632			12.2308	3442	12.2308	4213	12.2308	4232	12.2308	3068	12.2308	4358	12.231	4082
12.2374	3809	12.2373	3521	12.2374	4709	12.2373	3771	12.2373	5314	12.2375	3180			12.2374	2796	12.2375	4388	12.2374	3437	12.2375	3439	12.2373	5146	12.2375	3337			12.2373	3602	12.2373	4201	12.2372	4194	12.2372	3237	12.2372	4939	12.2375	3489
12.2439	4218	12.2438	4107	12.2439	4093	12.2438	3536	12.2438	6670	12.2439	3338			12.2439	4000	12.2439	4254	12.2439	3257	12.2439	2936	12.2438	4938	12.244	3380			12.2437	3084	12.2438	4047	12.2437	3962	12.2437	2555	12.2437	5793	12.244	4142
12.2504	4878	12.2503	4479	12.2504	4091	12.2502	3441	12.2503	8053	12.2504	3292			12.2503	4469	12.2504	3841	12.2503	4186	12.2504	3106	12.2503	5875	12.2504	3625			12.2502	3549	12.2502	4049	12.2502	4396	12.2501	2852	12.2501	6158	12.2504	3929
12.2568	7429	12.2568	4568	12.2568	3884	12.2567	3341	12.2568	10406	12.2569	3971			12.2568	5419	12.2569	3904	12.2568	3755	12.2569	3118	12.2568	6878	12.2569	3526			12.2567	3473	12.2567	3780	12.2566	4099	12.2566	2911	12.2566	7068	12.2569	3996
12.2633	7733	12.2632	4265	12.2633	4313	12.2632	3104	12.2632	14615	12.2633	3452			12.2633	5053	12.2634	3961	12.2633	3670	12.2634	3307	12.2632	7765	12.2634	3126			12.2631	3235	12.2632	3680	12.2631	4200	12.2631	3016	12.2631	8598	12.2634	4235
12.2698	9770	12.2697	5732	12.2698	3888	12.2697	2976	12.2697	17413	12.2698	4176			12.2698	5358	12.2698	4599	12.2698	3804	12.2698	3754	12.2697	8657	12.2698	3995			12.2696	4091	12.2696	4006	12.2696	3645	12.2696	3007	12.2696	8908	12.2698	4067
12.2762	9045	12.2762	5534	12.2762	3789	12.2761	3162	12.2761	19139	12.2762	4127			12.2762	5830	12.2763	4568	12.2762	3502	12.2763	3040	12.2761	9046	12.2763	3246			12.2761	4422	12.2761	4082	12.276	3772	12.276	3302	12.276	9937	12.2763	3730
12.2827	9165	12.2826	6139	12.2827	3914	12.2826	3100	12.2826	19104	12.2827	3829			12.2827	6004	12.2828	4222	12.2827	4005	12.2828	3311	12.2826	10019	12.2828	3078			12.2825	3979	12.2826	3793	12.2825	3181	12.2825	3366	12.2825	10519	12.2828	3609
12.2892	8427	12.2891	5625	12.2892	4018	12.289	3414	12.2891	16124	12.2892	3011			12.2892	6302	12.2892	4571	12.2892	3574	12.2892	3331	12.2891	8955	12.2892	3542			12.289	4358	12.289	4520	12.289	4072	12.289	3388	12.289	10170	12.2892	3192
12.2956	7401	12.2956	4720	12.2957	3922	12.2955	3154	12.2956	13054	12.2957	3533			12.2956	5521	12.2957	4152	12.2956	3672	12.2957	3291	12.2956	8421	12.2957	3915			12.2955	4438	12.2955	3677	12.2954	3531	12.2954	3169	12.2954	8641	12.2957	3743
12.3021	6207	12.302	4621	12.3021	3466	12.302	3918	12.302	10713	12.3021	4004			12.3021	4899	12.3022	3579	12.3021	3545	12.3022	3187	12.302	8033	12.3022	3235			12.3019	3965	12.302	4257	12.3019	3407	12.3019	3135	12.3019	7876	12.3022	3586
12.3086	4996	12.3085	4176	12.3086	4540	12.3085	3732	12.3085	8298	12.3086	5004			12.3086	3927	12.3086	3585	12.3086	3515	12.3087	2629	12.3085	7151	12.3087	3209			12.3084	3829	12.3085	3629	12.3084	3397	12.3084	3491	12.3084	7229	12.3087	4088
12.315	4434	12.315	4594	12.315	4559	12.3149	5599	12.315	6443	12.3151	5332			12.315	4020	12.3151	3821	12.315	4667	12.3151	2890	12.315	6741	12.3151	3502			12.3149	3797	12.3149	3510	12.3148	3384	12.3148	2771	12.3148	6829	12.3151	3529
12.3215	3460	12.3214	4158	12.3215	5227	12.3214	7365	12.3214	7133	12.3215	7376			12.3215	4341	12.3216	3399	12.3215	4051	12.3216	2988	12.3214	6847	12.3216	3581			12.3214	3359	12.3214	3458	12.3213	3735	12.3213	3383	12.3213	7382	12.3216	3668
12.328	4103	12.3279	5510	12.328	7317	12.3279	9189	12.3279	8623	12.328	9705			12.328	3866	12.328	2897	12.328	4001	12.328	3481	12.3279	6513	12.328	3851			12.3278	3049	12.3278	4432	12.3278	3353	12.3278	3167	12.3278	6242	12.328	3661
12.3345	4015	12.3344	6726	12.3345	9570	12.3343	10863	12.3344	8754	12.3345	11678			12.3345	2922	12.3345	4302	12.3345	5693	12.3345	3424	12.3344	7229	12.3345	4580			12.3343	2627	12.3343	3611	12.3343	3832	12.3343	2927	12.3343	6051	12.3345	3805
12.3409	4452	12.3408	6405	12.3409	11058	12.3408	12858	12.3408	9871	12.3409	13287			12.3409	3719	12.341	3810	12.3409	6410	12.341	3491	12.3408	9084	12.341	4451			12.3408	3699	12.3408	3644	12.3407	3963	12.3407	3495	12.3407	6410	12.341	4068
12.3474	4785	12.3473	6799	12.3474	10567	12.3473	15795	12.3473	10854	12.3474	14520			12.3474	3559	12.3474	3962	12.3474	6290	12.3475	4056	12.3473	9183	12.3475	4967			12.3472	3319	12.3473	3507	12.3472	4079	12.3472	3105	12.3472	5575	12.3475	4285
12.3538	5355	12.3538	7483	12.3539	11794	12.3537	14273	12.3538	11930	12.3539	13015			12.3538	3820	12.3539	4094	12.3538	6656	12.3539	3523	12.3538	8175	12.3539	3903			12.3537	2693	12.3537	3668	12.3537	3614	12.3537	3124	12.3537	6950	12.3539	3982
12.3603	5330	12.3603	6759	12.3603	9981	12.3602	12766	12.3602	11587	12.3604	12280			12.3603	4103	12.3604	3787	12.3603	5830	12.3604	3729	12.3602	7796	12.3604	4118			12.3602	3618	12.3602	3574	12.3601	4465	12.3601	3572	12.3601	6628	12.3604	3691
12.3668	5779	12.3667	5985	12.3668	9708	12.3667	11145	12.3667	10406	12.3668	10598			12.3668	3806	12.3668	4495	12.3668	6205	12.3669	3291	12.3667	8063	12.3669	4726			12.3666	3259	12.3667	3813	12.3666	3390	12.3666	2995	12.3666	7586	12.3669	3579
12.3733	4264	12.3732	5603	12.3733	8317	12.3731	8638	12.3732	9298	12.3733	7273			12.3733	4034	12.3733	3964	12.3733	5234	12.3733	3596	12.3732	7177	12.3733	4592			12.3731	3677	12.3731	4227	12.3731	3317	12.3731	3092	12.3731	7045	12.3733	3773
12.3797	4427	12.3796	4602	12.3797	6261	12.3796	7856	12.3796	8652	12.3797	5925			12.3797	4264	12.3798	4104	12.3797	4598	12.3798	3680	12.3796	5803	12.3798	3430			12.3796	3315	12.3796	3714	12.3795	3230	12.3795	3437	12.3795	6011	12.3798	3516
12.3862	3867	12.3861	4024	12.3862	5521	12.3861	5213	12.3861	7888	12.3862	5031			12.3862	3741	12.3863	3769	12.3862	3767	12.3863	3547	12.3861	6237	12.3863	3280			12.386	3176	12.3861	4017	12.386	3199	12.386	2940	12.386	6429	12.3863	2597
12.3927	3354	12.3926	3801	12.3927	5387	12.3925	5109	12.3926	6083	12.3927	4444			12.3927	3188	12.3927	3773	12.3927	4268	12.3927	3263	12.3926	4882	12.3927	3278			12.3925	2957	12.3925	4498	12.3925	3596	12.3925	3184	12.3925	5598	12.3927	3578
12.3991	3267	12.3991	3378	12.3992	3631	12.399	4048	12.3991	4804	12.3992	3628			12.3991	3216	12.3992	4197	12.3991	3612	12.3992	3231	12.3991	4471	12.3992	3205			12.399	2983	12.399	3874	12.3989	3338	12.3989	3343	12.3989	5107	12.3992	3741
12.4056	2930	12.4055	3710	12.4056	4262	12.4055	3598	12.4055	4260	12.4056	3937			12.4056	3191	12.4057	3884	12.4056	3940	12.4057	2737	12.4055	4488	12.4057	3223			12.4055	2759	12.4055	3546	12.4054	3473	12.4054	2976	12.4054	4599	12.4057	3209
12.4121	3009	12.412	3333	12.4121	3584	12.4119	3533	12.412	3501	12.4121	3050			12.4121	3168	12.4121	3899	12.4121	3420	12.4122	3253	12.412	3341	12.4122	3357			12.4119	2727	12.4119	4148	12.4119	3170	12.4119	2755	12.4119	3470	12.4122	3231
12.4185	2421	12.4185	3601	12.4185	3989	12.4184	3550	12.4185	3417	12.4186	3476			12.4185	3797	12.4186	2892	12.4185	3704	12.4186	3203	12.4185	3286	12.4186	3031			12.4184	3000	12.4184	3346	12.4184	3500	12.4183	3139	12.4183	3016	12.4186	3100
12.425	3163	12.4249	3140	12.425	3715	12.4249	3544	12.4249	3511	12.425	3066			12.425	3423	12.4251	3416	12.425	4075	12.4251	2993	12.4249	3652	12.4251	3308			12.4248	2989	12.4249	3107	12.4248	3632	12.4248	2827	12.4248	3466	12.4251	3161
12.4315	2912	12.4314	3057	12.4315	3792	12.4314	3154	12.4314	2963	12.4315	2759			12.4315	3342	12.4315	3736	12.4315	4149	12.4315	2291	12.4314	3457	12.4315	3127			12.4313	3015	12.4314	3426	12.4313	3101	12.4313	3062	12.4313	4124	12.4315	3270
12.438	3350	12.4379	3112	12.438	3222	12.4378	3159	12.4379	2885	12.438	3028			12.438	3406	12.438	3387	12.438	3593	12.438	3543	12.4379	3412	12.438	2637			12.4378	3215	12.4378	3835	12.4377	3423	12.4377	2621	12.4377	2937	12.438	3559
12.4444	3058	12.4444	3407	12.4444	3858	12.4443	2760	12.4443	3755	12.4444	2844			12.4444	3314	12.4445	3128	12.4444	3881	12.4445	2892	12.4443	2623	12.4445	3105			12.4443	2667	12.4443	3256	12.4442	2987	12.4442	3133	12.4442	2888	12.4445	2757
12.4509	2897	12.4508	3523	12.4509	3422	12.4508	3356	12.4508	3253	12.4509	3664			12.4509	3158	12.4509	3185	12.4509	3434	12.451	2905	12.4508	3191	12.451	3080			12.4507	3114	12.4507	2847	12.4507	2843	12.4507	2508	12.4507	3034	12.451	3073
12.4573	3121	12.4573	3522	12.4574	3761	12.4572	2817	12.4573	3246	12.4574	3614			12.4573	2888	12.4574	2999	12.4573	3997	12.4574	2737	12.4573	3586	12.4574	3198			12.4572	2748	12.4572	3209	12.4572	3660	12.4572	3205	12.4572	3618	12.4574	3630
12.4638	2934	12.4637	3492	12.4638	3389	12.4637	2961	12.4637	3519	12.4639	2906			12.4638	3509	12.4639	3193	12.4638	2963	12.4639	2847	12.4637	3469	12.4639	3166			12.4637	2884	12.4637	3680	12.4636	3022	12.4636	3240	12.4636	3131	12.4639	3412
12.4703	2889	12.4702	3192	12.4703	3232	12.4702	2600	12.4702	2956	12.4703	2877			12.4703	3125	12.4703	3627	12.4703	3298	12.4704	3066	12.4702	3105	12.4704	3113			12.4701	3097	12.4702	3127	12.4701	3480	12.4701	3264	12.4701	3048	12.4704	3729
12.4768	3026	12.4767	3228	12.4768	3931	12.4766	2832	12.4767	2973	12.4768	2576			12.4767	3132	12.4768	3125	12.4767	3133	12.4768	3080	12.4767	3391	12.4768	3241			12.4766	2941	12.4766	3599	12.4766	3875	12.4766	3159	12.4766	2496	12.4768	3195
12.4832	2785	12.4832	3025	12.4832	3183	12.4831	2410	12.4832	3287	12.4832	2821			12.4832	3057	12.4833	3458	12.4832	2989	12.4833	2908	12.4832	3448	12.4833	2635			12.4831	2697	12.4831	3210	12.483	3804	12.483	3013	12.483	3366	12.4833	3071
12.4897	2868	12.4896	3143	12.4897	3828	12.4896	2619	12.4896	2958	12.4897	2836			12.4897	3316	12.4898	3831	12.4897	3229	12.4898	2934	12.4896	3205	12.4898	3299			12.4895	3007	12.4896	3257	12.4895	3185	12.4895	3043	12.4895	3746	12.4898	3089
12.4962	2775	12.4961	2876	12.4962	3249	12.4961	2838	12.4961	3529	12.4962	2960			12.4962	3086	12.4962	3064	12.4962	3157	12.4962	3004	12.4961	3126	12.4962	3031			12.496	3077	12.496	2936	12.496	2989	12.496	2679	12.496	3423	12.4962	3302
12.5026	2645	12.5026	3182	12.5026	3602	12.5025	3229	12.5025	3521	12.5026	3300			12.5026	2926	12.5027	3265	12.5026	3468	12.5027	2985	12.5025	3493	12.5027	2939			12.5025	2632	12.5025	3281	12.5024	3607	12.5024	3539	12.5024	3777	12.5027	3238
12.5091	3652	12.509	3770	12.5091	3242	12.509	2940	12.509	3918	12.5091	2738			12.5091	2956	12.5091	2839	12.5091	3760	12.5092	3249	12.509	2905	12.5092	3152			12.509	3038	12.509	3282	12.5089	3155	12.5089	2849	12.5089	4102	12.5092	2963
12.5156	3494	12.5155	4022	12.5156	2874	12.5154	3020	12.5155	4383	12.5156	3019			12.5156	2951	12.5156	3482	12.5156	3319	12.5156	3134	12.5155	4020	12.5156	3161			12.5154	3381	12.5154	4221	12.5154	3510	12.5154	3138	12.5154	4178	12.5157	3155
12.5221	4534	12.522	3165	12.5221	3087	12.5219	2865	12.522	6472	12.5221	2524			12.522	4120	12.5221	3627	12.522	3286	12.5221	3157	12.522	3995	12.5221	3128			12.5219	2992	12.5219	3054	12.5219	3326	12.5218	3025	12.5218	5172	12.5221	2915
12.5285	5618	12.5284	3490	12.5285	3277	12.5284	3239	12.5284	8027	12.5285	3462			12.5285	4212	12.5286	3554	12.5285	3531	12.5286	3139	12.5284	5009	12.5286	3023			12.5283	2759	12.5284	2764	12.5283	3492	12.5283	3354	12.5283	6336	12.5286	3293
12.535	7284	12.5349	3667	12.535	2838	12.5349	3350	12.5349	11192	12.535	3014			12.535	4696	12.535	4079	12.535	3221	12.5351	2916	12.5349	6467	12.5351	2902			12.5348	4286	12.5349	3027	12.5348	3544	12.5348	3389	12.5348	8296	12.5351	2944
12.5414	8570	12.5414	4167	12.5414	3390	12.5413	3145	12.5414	13799	12.5415	2580			12.5414	6015	12.5415	3822	12.5414	3534	12.5415	3926	12.5414	7609	12.5415	3192			12.5413	4293	12.5413	2944	12.5412	2972	12.5412	3134	12.5412	9394	12.5415	3059
12.5479	8753	12.5479	4894	12.5479	3048	12.5478	2406	12.5478	14651	12.5479	2988			12.5479	5517	12.548	4133	12.5479	3342	12.548	2872	12.5478	9424	12.548	3004			12.5478	4365	12.5478	3690	12.5477	3431	12.5477	2878	12.5477	10370	12.548	3444
12.5544	10015	12.5543	5108	12.5544	3238	12.5543	2931	12.5543	16057	12.5544	2911			12.5544	6566	12.5544	3986	12.5544	3321	12.5544	3340	12.5543	8605	12.5544	3516			12.5542	4691	12.5542	3461	12.5542	3321	12.5542	3186	12.5542	11913	12.5545	3260
12.5609	8673	12.5608	4545	12.5609	3795	12.5607	3282	12.5608	15465	12.5609	3111			12.5609	6349	12.5609	3741	12.5609	3607	12.5609	3841	12.5608	8676	12.5609	3155			12.5607	4465	12.5607	3880	12.5607	2954	12.5607	2819	12.5607	11642	12.5609	4426
12.5673	8069	12.5672	4428	12.5673	3383	12.5672	2980	12.5672	13740	12.5673	2469			12.5673	6153	12.5674	3619	12.5673	3698	12.5674	3720	12.5672	8627	12.5674	3609			12.5672	4761	12.5672	3822	12.5671	3320	12.5671	2462	12.5671	11029	12.5674	4105
12.5738	7679	12.5737	4015	12.5738	3393	12.5737	2809	12.5737	12330	12.5738	2659			12.5738	5610	12.5739	3417	12.5738	3163	12.5739	3382	12.5737	8517	12.5739	3510			12.5736	4053	12.5737	3626	12.5736	3484	12.5736	3316	12.5736	10300	12.5739	5113
12.5803	5562	12.5802	3330	12.5803	3567	12.5801	2832	12.5802	9015	12.5803	3056			12.5802	5416	12.5803	4085	12.5802	3164	12.5803	3786	12.5802	5750	12.5803	3270			12.5801	4377	12.5801	2983	12.5801	3554	12.58	2801	12.58	9347	12.5803	6999
12.5867	4920	12.5867	3303	12.5867	2992	12.5866	2631	12.5867	7642	12.5868	2882			12.5867	4896	12.5868	3567	12.5867	3663	12.5868	3756	12.5867	5562	12.5868	3813			12.5866	3721	12.5866	3432	12.5865	3073	12.5865	2836	12.5865	8981	12.5868	7367
12.5932	3599	12.5931	3011	12.5932	3848	12.5931	3035	12.5931	5225	12.5932	2736			12.5932	4350	12.5932	3787	12.5932	3669	12.5933	3614	12.5931	4621	12.5933	3753			12.593	3417	12.5931	3309	12.593	3482	12.593	3153	12.593	7451	12.5933	8584
12.5997	3023	12.5996	3371	12.5997	3115	12.5996	3161	12.5996	4146	12.5997	2676			12.5997	4269	12.5997	3542	12.5997	3440	12.5997	3342	12.5996	3920	12.5997	4249			12.5995	3236	12.5995	2958	12.5995	3614	12.5995	2811	12.5995	8230	12.5997	9421
12.6061	3016	12.6061	3238	12.6061	3289	12.606	3701	12.606	3245	12.6061	2817			12.6061	3644	12.6062	3467	12.6061	3415	12.6062	3566	12.606	3516	12.6062	4951			12.606	3329	12.606	3381	12.6059	3383	12.6059	3171	12.6059	8214	12.6062	8677
12.6126	2601	12.6125	3224	12.6126	3400	12.6125	2856	12.6125	3248	12.6126	2673			12.6126	4041	12.6127	3562	12.6126	3063	12.6127	3569	12.6125	3894	12.6127	3556			12.6124	3234	12.6125	3660	12.6124	3207	12.6124	2410	12.6124	6794	12.6127	8421
12.6191	3319	12.619	3095	12.6191	3333	12.6189	3426	12.619	3147	12.6191	3342			12.6191	3342	12.6191	3849	12.6191	3023	12.6191	3176	12.619	3626	12.6191	4190			12.6189	2958	12.6189	3312	12.6189	3356	12.6189	3063	12.6189	6647	12.6191	8680
12.6255	3180	12.6255	3759	12.6256	3170	12.6254	2743	12.6255	3316	12.6256	3062			12.6255	3338	12.6256	3661	12.6255	3318	12.6256	3563	12.6255	3754	12.6256	3701			12.6254	2805	12.6254	3304	12.6253	3315	12.6253	2558	12.6253	6655	12.6256	7456
12.632	2714	12.6319	3286	12.632	2847	12.6319	2654	12.6319	2929	12.632	2879			12.632	3019	12.6321	3826	12.632	3547	12.6321	3005	12.6319	3363	12.6321	3277			12.6319	3275	12.6319	3373	12.6318	3230	12.6318	2797	12.6318	6053	12.6321	7804
12.6385	2689	12.6384	3215	12.6385	2832	12.6384	2853	12.6384	2802	12.6385	3090			12.6385	3166	12.6385	3086	12.6385	3059	12.6386	3608	12.6384	3700	12.6386	3657			12.6383	3172	12.6384	3466	12.6383	2929	12.6383	3295	12.6383	5666	12.6386	7179
12.6449	3022	12.6449	3202	12.6449	3268	12.6448	3091	12.6449	3003	12.645	2942			12.6449	3472	12.645	3381	12.6449	3124	12.645	3655	12.6449	3349	12.645	3761			12.6448	2965	12.6448	3451	12.6448	3107	12.6448	3186	12.6448	5715	12.645	6102
12.6514	2594	12.6513	3260	12.6514	2969	12.6513	3101	12.6513	2827	12.6514	3063			12.6514	2670	12.6515	3348	12.6514	3406	12.6515	3420	12.6513	3219	12.6515	3251			12.6512	2814	12.6513	3886	12.6512	3462	12.6512	3226	12.6512	5128	12.6515	6605
12.6579	2787	12.6578	3540	12.6579	3373	12.6578	2764	12.6578	2933	12.6579	2971			12.6579	3183	12.6579	2951	12.6579	3325	12.6579	3958	12.6578	3868	12.6579	3109			12.6577	2696	12.6578	3297	12.6577	3351	12.6577	3313	12.6577	3983	12.6579	5357
12.6644	2680	12.6643	3676	12.6644	3485	12.6642	2957	12.6643	3433	12.6644	3136			12.6644	3258	12.6644	3593	12.6644	2941	12.6644	3464	12.6643	3272	12.6644	3337			12.6642	3176	12.6642	2825	12.6641	3430	12.6641	3479	12.6641	3966	12.6644	5625
12.6708	2906	12.6707	3525	12.6708	3224	12.6707	3007	12.6707	3461	12.6708	2812			12.6708	3280	12.6709	3222	12.6708	3480	12.6709	3596	12.6707	3492	12.6709	3340			12.6707	3428	12.6707	3406	12.6706	3029	12.6706	2815	12.6706	4920	12.6709	5454
12.6773	2979	12.6772	2766	12.6773	3446	12.6772	2357	12.6772	3602	12.6773	3130			12.6773	3159	12.6774	3658	12.6773	2941	12.6774	3710	12.6772	3409	12.6774	3184			12.6771	3106	12.6771	2910	12.6771	2683	12.6771	3260	12.6771	4323	12.6774	4560
12.6837	2737	12.6837	2914	12.6838	3827	12.6836	3173	12.6837	2896	12.6838	3297			12.6837	3432	12.6838	3423	12.6837	3056	12.6838	3705	12.6837	3720	12.6838	3318			12.6836	2904	12.6836	3416	12.6836	3032	12.6836	3141	12.6836	4739	12.6838	4987
12.6902	2703	12.6901	2850	12.6902	3344	12.6901	2692	12.6901	3822	12.6903	2667			12.6902	3247	12.6903	3272	12.6902	3158	12.6903	3611	12.6901	3804	12.6903	3140			12.6901	2797	12.6901	3283	12.69	3503	12.69	2826	12.69	4637	12.6903	4631
12.6967	2992	12.6966	3297	12.6967	3343	12.6966	2984	12.6966	3304	12.6967	2682			12.6967	2898	12.6967	3155	12.6967	3842	12.6968	3699	12.6966	3825	12.6968	2834			12.6965	2880	12.6966	3370	12.6965	3372	12.6965	2918	12.6965	4127	12.6968	4321
12.7032	3270	12.7031	3174	12.7032	3349	12.703	2514	12.7031	3152	12.7032	3002			12.7032	3079	12.7032	3807	12.7032	3345	12.7032	3350	12.7031	3383	12.7032	3527			12.703	2960	12.703	3062	12.703	3150	12.703	2801	12.703	4568	12.7032	3291
12.7096	2629	12.7096	3490	12.7096	3203	12.7095	2938	12.7096	2965	12.7096	2998			12.7096	3334	12.7097	3847	12.7096	3052	12.7097	3716	12.7096	3643	12.7097	3018			12.7095	3112	12.7095	3454	12.7094	3170	12.7094	3292	12.7094	4531	12.7097	3899
12.7161	3073	12.716	3117	12.7161	3485	12.716	2919	12.716	3054	12.7161	2882			12.7161	3050	12.7162	3310	12.7161	3236	12.7162	2792	12.716	3406	12.7162	3157			12.7159	2941	12.716	3202	12.7159	2924	12.7159	3178	12.7159	4644	12.7162	4487
12.7226	2903	12.7225	2738	12.7226	3579	12.7225	2892	12.7225	3133	12.7226	3036			12.7226	3069	12.7226	2976	12.7226	3057	12.7226	3688	12.7225	3139	12.7226	3196			12.7224	3130	12.7224	3277	12.7224	3168	12.7224	3145	12.7224	4605	12.7226	3931
12.729	3222	12.729	2919	12.7291	3198	12.7289	2675	12.7289	2840	12.7291	3236			12.729	3014	12.7291	3738	12.729	3362	12.7291	3178	12.7289	3321	12.7291	3533			12.7289	2910	12.7289	3182	12.7288	2989	12.7288	2942	12.7288	3733	12.7291	4405
12.7355	2867	12.7354	3463	12.7355	3270	12.7354	2572	12.7354	3194	12.7355	2672			12.7355	3164	12.7356	3422	12.7355	3499	12.7356	3284	12.7354	3012	12.7356	3147			12.7354	3150	12.7354	2556	12.7353	3456	12.7353	2823	12.7353	3729	12.7356	4107
12.742	2599	12.7419	3114	12.742	3202	12.7418	2764	12.7419	2835	12.742	2828			12.742	2782	12.742	3266	12.742	3299	12.7421	3380	12.7419	2881	12.7421	3332			12.7418	2730	12.7418	3603	12.7418	3009	12.7418	3089	12.7418	4089	12.7421	3606
12.7485	3130	12.7484	3104	12.7485	2780	12.7483	2619	12.7484	3284	12.7485	3060			12.7484	2955	12.7485	3536	12.7484	3087	12.7485	3187	12.7484	3533	12.7485	3623			12.7483	3015	12.7483	3253	12.7483	3141	12.7483	2840	12.7483	4283	12.7485	3247
12.7549	3095	12.7548	3236	12.7549	3089	12.7548	2945	12.7548	3530	12.7549	3087			12.7549	2849	12.755	3730	12.7549	2972	12.755	3542	12.7548	3103	12.755	3380			12.7547	2617	12.7548	3320	12.7547	2869	12.7547	3260	12.7547	4416	12.755	3212
12.7614	2490	12.7613	3149	12.7614	3202	12.7613	3013	12.7613	3032	12.7614	2665			12.7614	3386	12.7614	3436	12.7614	3178	12.7614	3354	12.7613	3601	12.7614	3128			12.7612	2995	12.7613	3275	12.7612	3167	12.7612	2960	12.7612	3853	12.7614	3895
12.7678	2679	12.7678	3388	12.7678	2986	12.7677	2603	12.7678	2951	12.7679	2717			12.7678	3009	12.7679	3125	12.7678	3712	12.7679	3848	12.7678	2771	12.7679	3377			12.7677	3169	12.7677	3514	12.7676	3426	12.7676	3294	12.7676	3471	12.7679	3084
12.7743	3050	12.7743	2989	12.7743	3263	12.7742	2639	12.7742	3114	12.7743	2770			12.7743	3336	12.7744	3358	12.7743	3129	12.7744	3194	12.7742	3150	12.7744	3370			12.7742	3141	12.7742	3228	12.7741	3187	12.7741	2595	12.7741	4289	12.7744	3166
12.7808	2895	12.7807	3310	12.7808	3074	12.7807	2613	12.7807	2727	12.7808	2734			12.7808	2687	12.7808	3425	12.7808	2712	12.7808	3549	12.7807	3336	12.7808	3066			12.7806	2930	12.7806	3583	12.7806	3627	12.7806	2781	12.7806	3308	12.7809	3812
12.7873	3139	12.7872	3760	12.7873	3373	12.7871	3028	12.7872	2798	12.7873	2418			12.7873	2510	12.7873	3307	12.7873	3385	12.7873	3453	12.7872	3262	12.7873	2998			12.7871	2809	12.7871	3551	12.7871	3414	12.7871	2978	12.7871	2952	12.7873	2859
12.7937	3335	12.7936	2835	12.7937	3111	12.7936	2541	12.7936	3331	12.7937	3065			12.7937	3360	12.7938	3718	12.7937	3411	12.7938	3198	12.7936	2756	12.7938	3158			12.7936	2837	12.7936	2825	12.7935	3668	12.7935	3009	12.7935	3388	12.7938	3549
12.8002	3079	12.8001	3248	12.8002	3280	12.8001	2829	12.8001	3229	12.8002	2676			12.8002	3505	12.8003	3141	12.8002	3221	12.8003	3345	12.8001	2952	12.8003	3215			12.8	3038	12.8001	3326	12.8	3518	12.8	2706	12.8	3308	12.8003	3523
12.8067	2983	12.8066	2944	12.8067	3094	12.8065	2818	12.8066	2708	12.8067	2947			12.8066	3442	12.8067	3603	12.8066	3133	12.8067	2496	12.8066	3161	12.8067	2946			12.8065	3421	12.8065	3157	12.8065	3297	12.8065	3129	12.8065	3696	12.8067	3058
12.8131	3451	12.8131	3609	12.8131	3352	12.813	2516	12.8131	3220	12.8132	2992			12.8131	3314	12.8132	3066	12.8131	3332	12.8132	3283	12.8131	2982	12.8132	3455			12.813	2666	12.813	3057	12.8129	3162	12.8129	3527	12.8129	2916	12.8132	3542
12.8196	3198	12.8195	3417	12.8196	3359	12.8195	2439	12.8195	2451	12.8196	2845			12.8196	3016	12.8196	3456	12.8196	2886	12.8197	3237	12.8195	3476	12.8197	2665			12.8194	3268	12.8195	3314	12.8194	3170	12.8194	3185	12.8194	3727	12.8197	2758
12.8261	2982	12.826	3744	12.8261	3380	12.826	2460	12.826	3066	12.8261	3096			12.8261	3370	12.8261	3763	12.8261	3281	12.8261	2726	12.826	3154	12.8261	3272			12.8259	3084	12.8259	3216	12.8259	3355	12.8259	3367	12.8259	3811	12.8262	3246
12.8325	2797	12.8325	3477	12.8325	3022	12.8324	3208	12.8324	2825	12.8325	2835			12.8325	2399	12.8326	3366	12.8325	3356	12.8326	3060	12.8324	3172	12.8326	3284			12.8324	2803	12.8324	3063	12.8323	3157	12.8323	2489	12.8323	3800	12.8326	3851
12.839	2943	12.8389	3018	12.839	3233	12.8389	3002	12.8389	2909	12.839	2897			12.839	3020	12.8391	3179	12.839	3192	12.8391	3229	12.8389	3321	12.8391	3213			12.8389	3000	12.8389	2862	12.8388	3063	12.8388	3566	12.8388	3231	12.8391	3445
12.8455	2994	12.8454	3479	12.8455	3642	12.8453	2893	12.8454	2886	12.8455	3172			12.8455	3334	12.8455	2992	12.8455	3463	12.8455	2951	12.8454	2765	12.8455	2671			12.8453	2498	12.8453	3148	12.8453	3359	12.8453	3278	12.8453	2938	12.8455	3102
12.852	2925	12.8519	3337	12.852	2728	12.8518	2862	12.8519	2696	12.852	3155			12.8519	3213	12.852	3538	12.8519	3372	12.852	3019	12.8519	2858	12.852	3010			12.8518	3138	12.8518	3526	12.8517	3208	12.8517	2670	12.8517	3255	12.852	3408
12.8584	3311	12.8583	3102	12.8584	3109	12.8583	2436	12.8583	3170	12.8584	2554			12.8584	3605	12.8585	3464	12.8584	2853	12.8585	2983	12.8583	2676	12.8585	3318			12.8582	2991	12.8583	2981	12.8582	3108	12.8582	2774	12.8582	3460	12.8585	3921
12.8649	3126	12.8648	3020	12.8649	3119	12.8648	3353	12.8648	3170	12.8649	2999			12.8649	3062	12.8649	3042	12.8649	3051	12.865	3472	12.8648	2999	12.865	3042			12.8647	2683	12.8648	3598	12.8647	2994	12.8647	2803	12.8647	2981	12.865	3758
12.8713	2996	12.8713	3200	12.8713	3271	12.8712	2972	12.8713	2755	12.8714	2575			12.8713	3346	12.8714	3614	12.8713	3452	12.8714	3556	12.8713	3689	12.8714	3234			12.8712	3246	12.8712	3206	12.8712	2937	12.8712	2898	12.8712	3370	12.8714	3599
12.8778	2993	12.8778	3659	12.8778	3090	12.8777	3027	12.8777	3146	12.8778	2522			12.8778	2987	12.8779	3164	12.8778	3197	12.8779	3431	12.8777	3049	12.8779	2864			12.8776	2876	12.8777	3016	12.8776	3112	12.8776	3232	12.8776	3770	12.8779	2717
12.8843	2879	12.8842	3324	12.8843	3370	12.8842	2822	12.8842	3444	12.8843	2925			12.8843	3225	12.8843	3440	12.8843	3050	12.8843	2483	12.8842	3331	12.8843	2864			12.8841	3192	12.8841	3367	12.8841	3447	12.8841	2819	12.8841	3612	12.8844	2853
[truncated: 4,346 more rows]

## Sheet: Fig.S2
This page contains the raw data used to generate Fig. S2.
Fig.S2a
Samples	1	2	3	Average	density（number/m2）	SD
ZNH	58	52	36	48.6667	49	9.28559
KF	48	66	60	58	58	7.48331
[truncated: 12 more rows]
