# Supplementary material for: Untargeted metabolites profiling of volatile components of Chinese Antique Lotus (Nelumbo nucifera Gaertn.) using solid-phase microextraction (SPME) GC/MS
Source: PeerJ. 2025 Jun 19;13:e19600. doi: 10.7717/peerj.19600 (PMC12182725; doi:10.7717/peerj.19600)
Supplement: Supplemental Information 14 [file peerj-13-19600-s014.xlsx]

## Sheet: Counting process
Petal	OAV(ng/g)	ZNH-1		ZNH-2		ZNH-3		KF-1		KF-2		KF-3		PLD-1		PLD-2		PLD-3		LS-1		LS-2		LS-3		ZQ-1		ZQ-2		ZQ-3		YMY-1		YMY-2		YMY-3
α-Pinene	2.2	27.4796	12.4907	12.9123	5.86921	39.7952	18.0887	70.404	32.0018	51.3111	23.3232	36.5086	16.5948	109.015	49.5524	116.296	52.8619	178.965	81.3476	39.5608	17.9822	76.051	34.5686	105.86	48.1184	91.1068	41.4122	99.1074	45.0488	95.2476	43.2943	81.2326	36.9239	83.0669	37.7577	70.7306	32.1503
Sabinen	980	79.1232	0.080738	43.5118	0.0443998	126.22	0.128796	251.902	0.257043	181.89	0.185602	194.95	0.198928	310.316	0.316648	314.141	0.320552	636.128	0.64911	140.468	0.143335	235.319	0.240121	341.225	0.348188	367.874	0.375381	546.748	0.557906	291.796	0.297751	447.745	0.456883	282.889	0.288662	220.065	0.224557
β-Pinene	4160	11.8692	0.00285317	5.58116	0.00134162	17.7466	0.004266	30.9766	0.00744631	22.1752	0.00533058	17.4107	0.00418526	48.9118	0.0117577	50.8647	0.0122271	78.9334	0.0189744	18.2554	0.00438831	32.9285	0.00791549	45.5128	0.0109406	40.6653	0.0097753	43.0832	0.0103565	44.8625	0.0107842	36.8942	0.00886879	34.752	0.00835385	29.8088	0.00716557
β-Myrcene	1.2	36.6084	30.507	18.1624	15.1354	54.3243	45.2702	97.8439	81.5366	74.1076	61.7564	42.5165	35.4304	126.07	105.058	154.998	129.165	235.208	196.007	54.54	45.45	101.614	84.6781	120.775	100.646	120.273	100.228	131.918	109.931	123.71	103.092	107.758	89.7986	101.903	84.9189	81.2304	67.692
α-Phellandrene	40	0	0	0	0	0	0	0	0	0	0	0	0	2.59702	0.0649254	1.90223	0.0475558	2.85212	0.0713029	0	0	0	0	0	0	1.42078	0.0355196	1.31329	0.0328322	1.24873	0.0312183	0	0	0	0	0	0
α-Terpinene	80	34.9828	0.437285	16.212	0.20265	49.8178	0.622722	82.8154	1.03519	61.9032	0.773791	30.7183	0.383978	135.067	1.68834	154.401	1.93002	210.16	2.627	55.8067	0.697583	104.631	1.30788	120.679	1.50848	101.661	1.27076	68.5687	0.857109	117.476	1.46845	69.8156	0.872695	88.8498	1.11062	80.5196	1.00649
Limonene	34	45.9972	1.35286	23.3033	0.685391	71.9367	2.11578	122.452	3.60153	91.5751	2.69338	62.4043	1.83542	178.373	5.24627	198.896	5.84987	306.789	9.02322	78.4825	2.30831	135.769	3.9932	163.673	4.81392	164.4	4.83529	158.742	4.66888	165.671	4.87268	152.131	4.47445	134.054	3.94277	114.981	3.3818
Eucalyptol	1.1	105.176	95.6145	62.961	57.2372	161.193	146.539	262.836	238.942	189.601	172.365	176.945	160.86	403.916	367.197	413.887	376.261	574.062	521.875	163.195	148.359	260.249	236.59	323.947	294.497	395.368	359.425	352.049	320.045	431.012	391.829	364.004	330.912	305.749	277.954	271.635	246.941
β-Ocimene	34	0	0	0	0	0	0	0	0	0	0	0	0	2.57264	0.075666	3.09685	0.0910838	5.0383	0.148185	0	0	0	0	0	0	2.64655	0.0778396	2.6362	0.0775353	3.75022	0.110301	2.14779	0.0631704	2.059	0.060559	1.44506	0.0425017
γ-Terpinene	1000	65.269	0.065269	32.0701	0.0320701	96.5962	0.0965962	156.758	0.156758	114.094	0.114094	71.158	0.071158	258.417	0.258417	279.264	0.279264	370.107	0.370107	103.826	0.103826	185.332	0.185332	220.342	0.220342	220.981	0.220981	145.21	0.14521	266.961	0.266961	162.76	0.16276	184.706	0.184706	164.048	0.164048
Terpinolene	200	14.6362	0.0731809	6.88358	0.0344179	23.0853	0.115426	40.2777	0.201389	27.8432	0.139216	18.8422	0.0942111	62.4001	0.312001	69.6667	0.348333	91.1327	0.455664	22.7651	0.113826	43.5757	0.217879	52.0953	0.260476	62.7941	0.313971	44.4902	0.222451	75.2688	0.376344	48.5813	0.242907	51.2426	0.256213	42.8609	0.214304
Terpinen-4-ol	1200	68.4162	0.0570135	35.969	0.0299742	98.7173	0.0822644	210.019	0.175016	94.4124	0.078677	90.7049	0.0755874	210.169	0.175141	207.5	0.172917	298.211	0.248509	120.637	0.100531	183.879	0.153233	162.727	0.135606	427.054	0.355878	364.341	0.303618	697.864	0.581553	368.993	0.307494	388.695	0.323912	306.854	0.255712
α-Terpineol	1200	24.218	0.0201816	16.8439	0.0140366	50.4229	0.0420191	77.2317	0.0643598	45.5292	0.037941	40.7288	0.0339407	71.604	0.05967	65.1431	0.0542859	97.3458	0.0811215	42.1129	0.0350941	57.4976	0.0479147	65.3636	0.0544697	173.003	0.144169	200.827	0.167356	336.853	0.280711	127.873	0.106561	123.197	0.102664	117.243	0.0977022
Caryophyllene	64	717.767	11.2151	519.632	8.11925	817.329	12.7708	531.641	8.30689	807.468	12.6167	184.353	2.88052	0	0	0	0	0	0	226.703	3.54224	406.159	6.34623	119.587	1.86855	15.0809	0.23564	16.4022	0.256284	15.1766	0.237134	125.506	1.96102	205.649	3.21327	222.865	3.48226
Humulene	160	93.6827	0.585517	67.0469	0.419043	97.0306	0.606441	66.0259	0.412662	99.5598	0.622249	26.8577	0.167861	0	0	0	0	0	0	31.6786	0.197991	51.5774	0.322359	19.7479	0.123425	0	0	0	0	0	0	21.9345	0.137091	29.8651	0.186657	32.1633	0.201021
Caryophyllene oxide	410	0	0	0	0	0	0	0	0	0	0	0	0	104.26	0.254292	122.273	0.298227	89.9674	0.219433	0	0	0	0	0	0	0	0	0	0	0	0	0	0	0	0	0	0
Tetradecane	1000	68.3008	0.0683008	86.6886	0.0866886	100.862	0.100862	84.5462	0.0845462	77.474	0.077474	50.2982	0.0502982	74.4729	0.0744729	85.5465	0.0855465	77.0081	0.0770081	66.5925	0.0665925	60.1372	0.0601372	64.9432	0.0649432	112.378	0.112378	98.1216	0.0981216	139.866	0.139866	89.75	0.08975	114.504	0.114504	87.7204	0.0877204
Hexadecane	350000	35.5339	0.000101525	48.2755	0.00013793	48.9989	0.000139997	37.5277	0.000107222	30.1768	8.62195e-05	31.694	9.05543e-05	23.7937	6.79821e-05	28.265	8.07571e-05	20.0641	5.7326e-05	32.246	9.21315e-05	23.7678	6.7908e-05	31.8616	9.10331e-05	35.1822	0.000100521	37.6111	0.00010746	55.0906	0.000157402	25.6994	7.34268e-05	29.9647	8.56135e-05	27.8468	7.95623e-05
Stamen	OAV(ng/g)	ZNH-1		ZNH-2		ZNH-3		KF-1		KF-2		KF-3		PLD-1		PLD-2		PLD-3		LS-1		LS-2		LS-3		ZQ-1		ZQ-2		ZQ-3		YMY-1		YMY-2		YMY-3
α-Pinene	2.2	10.8349	4.92495	14.8858	6.7663	8.39454	3.8157	12.8166	5.82574	36.6632	16.6651	19.3009	8.77316	33.5394	15.2452	48.0293	21.8315	56.0561	25.48	19.9128	9.05128	29.593	13.4513	18.2388	8.29036	58.9541	26.7973	60.6047	27.5476	60.155	27.3432	43.1072	19.5942	31.3323	14.242	26.9384	12.2447
Sabinen	980	33.3478	0.0340284	63.7591	0.0650603	33.9034	0.0345953	38.8308	0.0396232	82.9993	0.0846932	57.2243	0.0583922	126.489	0.12907	154.859	0.158019	228.331	0.232991	62.4978	0.0637733	87.5398	0.0893263	51.3151	0.0523624	200.979	0.205081	211.931	0.216257	194.765	0.198739	141.571	0.14446	71.2745	0.0727291	67.5126	0.0688904
β-Pinene	4160	6.40114	0.00153874	8.9883	0.00216065	4.85715	0.00116758	8.28921	0.0019926	24.2288	0.00582424	13.1662	0.00316494	19.5491	0.00469931	24.7761	0.0059558	32.6445	0.00784723	13.5717	0.00326244	18.9268	0.00454971	10.8571	0.00260987	38.9121	0.00935387	38.4352	0.00923924	39.8061	0.00956878	29.7633	0.00715465	23.2012	0.00557721	19.8695	0.00477632
β-Myrcene	1.2	22.6595	18.8829	25.2326	21.0272	20.015	16.6791	79.7846	66.4871	67.9186	56.5988	35.6245	29.6871	42.1078	35.0898	47.2619	39.3849	82.8059	69.0049	30.0527	25.0439	44.2376	36.8646	22.1842	18.4868	107.508	89.5903	99.6858	83.0715	106.597	88.8312	85.1411	70.951	58.4257	48.6881	49.8167	41.514
α-Phellandrene	40		0		0		0		0		0		0	1.51763	0.0379408	1.46393	0.0365983	1.43731	0.0359328		0		0		0	3.2138	0.0803449	2.45432	0.0613581	2.41753	0.0604382		0		0		0
α-Terpinene	80	31.013	0.387662	38.4024	0.48003	19.4974	0.243718	42.4888	0.53111	133.191	1.66489	65.9541	0.824426	71.5245	0.894056	79.1439	0.989299	117.04	1.46299	67.4558	0.843198	98.7795	1.23474	50.5496	0.63187	173.974	2.17467	160.301	2.00376	188.732	2.35915	131.639	1.64549	108.312	1.35391	94.6535	1.18317
Limonene	34	47.9613	1.41063	61.0283	1.79495	32.469	0.95497	60.0698	1.76676	167.802	4.93534	94.2958	2.77341	99.878	2.93759	105.022	3.08889	160.903	4.73245	91.0676	2.67846	125.057	3.67815	67.7851	1.99368	237.346	6.98076	222.235	6.53633	256.655	7.54867	178.548	5.25142	145.677	4.28462	127.409	3.74731
Eucalyptol	1.1	105.192	95.6291	128.392	116.72	68.9123	62.6476	125.241	113.855	345.54	314.127	194.148	176.498	301.359	273.963	248.773	226.158	402.459	365.872	194.523	176.839	238.495	216.814	178.939	162.672	511.707	465.188	498.69	453.355	475.95	432.681	448.988	408.171	348.915	317.195	325.268	295.699
β-Ocimene	34		0		0		0		0		0		0		0		0		0		0		0		0	2.64953	0.0779275	2.36172	0.0694624	2.34461	0.0689592	2.40844	0.0708365	1.84758	0.0543407	1.07361	0.0315767
γ-Terpinene	1000	79.9987	0.0799987	93.8243	0.0938243	46.4236	0.0464236	96.4129	0.0964129	290.139	0.290139	154.236	0.154236	190.429	0.190429	161.364	0.161364	282.191	0.282191	155.873	0.155873	219.108	0.219108	131.882	0.131882	408.715	0.408715	378.634	0.378634	434.479	0.434479	335.341	0.335341	285.949	0.285949	240.858	0.240858
Terpinolene	200	21.6187	0.108094	25.3588	0.126794	13.399	0.066995	25.5783	0.127892	76.0032	0.380016	41.3001	0.206501	49.2161	0.24608	39.0382	0.195191	72.2327	0.361164	38.4846	0.192423	54.0999	0.2705	32.6676	0.163338	107.599	0.537995	100.596	0.502979	112.27	0.561351	88.2073	0.441036	74.9272	0.374636	60.4569	0.302285
Terpinen-4-ol	1200	19.7376	0.016448	26.3639	0.0219699	11.9138	0.00992818	31.8101	0.0265084	112.881	0.0940673	56.2479	0.0468732	111.916	0.0932637	70.7925	0.0589938	143.343	0.119453	62.7238	0.0522698	85.5204	0.071267	70.5559	0.0587966	157.587	0.131322	167.359	0.139466	177.68	0.148067	205.724	0.171437	173.845	0.144871	123.473	0.102894
α-Terpineol	1200	1.29675	0.00108063	2.83292	0.00236076	0.912366	0.000760305	3.47515	0.00289596	9.13054	0.00760878	8.30006	0.00691672	7.4303	0.00619192	4.1729	0.00347742	10.9329	0.00911077	5.99986	0.00499988	7.14184	0.00595153	7.70074	0.00641728	21.3429	0.0177857	20.3775	0.0169813	19.2489	0.0160408	23.516	0.0195967	12.7033	0.010586	10.6843	0.00890354
Caryophyllene	64	2897.82	45.2784	3511.74	54.871	2747.1	42.9234	3205.41	50.0845	2048.2	32.0031	3724.7	58.1984		0		0		0	1694.5	26.4765	1211.34	18.9272	1218.99	19.0468		0		0		0	1451.08	22.6731	1946.44	30.4132	1328.17	20.7526
Humulene	160	394.737	2.46711	465.777	2.9111	342.521	2.14075	422.072	2.63795	245.93	1.53706	497.456	3.1091		0		0		0	201.777	1.26111	129.399	0.808746	141.328	0.883298		0		0		0	175.503	1.09689	229.489	1.4343	158.477	0.990482
Caryophyllene oxide	410	216.142	0.527175	207.178	0.505312	120.005	0.292695	251.068	0.612362	46.797	0.114139	295.115	0.719793		0		0		0	66.2739	0.161644	17.7149	0.0432071	27.7455	0.067672		0		0		0	79.4013	0.193662	61.2706	0.149441	41.9431	0.1023
1-Hexanol	5.6	9.44803	1.68715	9.22771	1.6478	9.89424	1.76683	10.6149	1.89552	9.6677	1.72638	9.14289	1.63266		0		0		0	9.86536	1.76167	10.1339	1.80963	9.42968	1.68387	10.3055	1.84028	10.1629	1.81481	9.22994	1.6482	9.10303	1.62554	9.85118	1.75914	10.4053	1.85809
Tetradecane	1000	11.8895	0.0118895	13.7359	0.0137359	12.6985	0.0126985	13.6485	0.0136485	16.6649	0.0166649	14.213	0.014213	12.9782	0.0129782	12.6829	0.0126829	16.0191	0.0160191	14.5489	0.0145489	14.6335	0.0146335	12.9905	0.0129905	14.9794	0.0149794	15.3923	0.0153923	16.7472	0.0167472	18.7019	0.0187019	14.1747	0.0141747	13.0338	0.0130338
Hexadecane	350000	9.38415	2.68119e-05	9.58128	2.73751e-05	9.12758	2.60788e-05		0		0		0		0		0		0		0		0		0	9.76066	2.78876e-05	9.45158	2.70045e-05	9.53452	2.72415e-05	9.68415	2.7669e-05	9.10013	2.60004e-05	8.90932	2.54552e-05
Receptacle	OAV(ng/g)	ZNH-1		ZNH-2		ZNH-3		KF-1		KF-2		KF-3		PLD-1		PLD-2		PLD-3		LS-1		LS-2		LS-3		ZQ-1		ZQ-2		ZQ-3		YMY-1		YMY-2		YMY-3
α-Pinene	2.2	3.16123	1.43692	7.16666	3.25757	4.60249	2.09204	3.21929	1.46331	7.665	3.48409	4.18634	1.90288	11.3856	5.17529	24.3637	11.0744	21.0207	9.55488	3.59766	1.6353	7.46193	3.39179	10.4222	4.73738	12.1088	5.50401	13.2124	6.00562	12.5291	5.69504	7.83761	3.56255	9.28511	4.22051	5.81118	2.64145
Sabinen	980	1.74809	0.00178376	3.81517	0.00389303	3.25103	0.00331737	1.70926	0.00174414	3.1274	0.00319123	2.37499	0.00242346		0		0		0	1.51138	0.00154222	4.7557	0.00485275	10.91	0.0111326	17.0206	0.017368	20.1183	0.0205289	15.8099	0.0161326	15.8135	0.0161362	3.10536	0.00316874	1.69581	0.00173042
β-Pinene	4160	1.64508	0.000395453	3.91615	0.000941382	2.29725	0.000552224	2.10673	0.000506426	5.45822	0.00131207	3.00809	0.000723098	6.46413	0.00155388	14.0759	0.00338362	10.8587	0.00261027	2.45504	0.000590155	4.89133	0.0011758	5.32186	0.00127929	9.70758	0.00233355	9.576	0.00230192	9.24381	0.00222207	7.11468	0.00171026	7.38476	0.00177518	4.80027	0.00115391
β-Myrcene	1.2		0		0		0		0		0		0	7.9494	6.6245	29.1208	24.2674	17.0124	14.177		0		0		0	16.3374	13.6145	14.6452	12.2043	12.4086	10.3405	11.6902	9.74179	9.53205	7.94338	6.3153	5.26275
α-Phellandrene	40		0		0		0		0		0		0	1.98302	0.0495756	3.82625	0.0956563	1.29578	0.0323944		0		0		0		0		0		0	0.249397	0.00623492	1.24907	0.0312268	0.663074	0.0165769
α-Terpinene	80	6.48042	0.0810052	16.4887	0.206108	8.38823	0.104853	13.7339	0.171674	42.4086	0.530107	20.8211	0.260264	51.6955	0.646194	133.65	1.67063	83.1646	1.03956	16.3819	0.204774	35.0483	0.438103	31.223	0.390288	63.0646	0.788308	58.8168	0.73521	61.49	0.768625	49.2739	0.615924	70.6889	0.883612	45.0328	0.56291
Limonene	34	9.57071	0.281491	21.5814	0.634747	10.3737	0.305108	15.9379	0.468762	45.7634	1.34598	23.1327	0.680373	46.4719	1.36682	118.998	3.49993	75.6722	2.22565	16.5002	0.485301	31.7077	0.932579	29.5996	0.870576	76.0407	2.23649	71.5235	2.10363	69.7524	2.05154	57.8622	1.70183	72.7639	2.14012	47.6021	1.40006
Eucalyptol	1.1	109.143	99.2212	152.617	138.743	79.8144	72.5586	148.255	134.777	341.412	310.375	182.13	165.572	261.836	238.033	499.954	454.504	384.885	349.895	180.518	164.107	332.617	302.379	186.881	169.892	539.013	490.012	471.443	428.584	468.201	425.638	507.896	461.724	421.638	383.307	331.443	301.311
γ-Terpinene	1000	24.9565	0.0249565	51.0881	0.0510881	24.5197	0.0245197	41.2363	0.0412363	119.647	0.119647	58.783	0.058783	128.483	0.128483	329.664	0.329664	202.877	0.202877	52.2066	0.0522066	101.613	0.101613	81.7416	0.0817416	205.439	0.205439	183.732	0.183732	186.518	0.186518	162.678	0.162678	198.872	0.198872	134.054	0.134054
Terpinolene	200	6.1162	0.030581	13.381	0.0669048	5.73197	0.0286598	10.4263	0.0521317	31.7502	0.158751	14.751	0.0737549	31.7155	0.158577	88.2384	0.441192	51.5135	0.257567	13.0454	0.065227	26.3621	0.13181	19.816	0.0990799	55.5108	0.277554	49.0416	0.245208	50.2359	0.25118	43.8945	0.219473	51.6545	0.258272	34.0377	0.170188
Terpinen-4-ol	1200	11.725	0.00977081	18.9867	0.0158222	11.1524	0.0092937	28.927	0.0241058	103.454	0.0862116	41.349	0.0344575	34.2994	0.0285828	176.376	0.14698	76.4409	0.0637008	54.1373	0.0451144	161.166	0.134305	66.2611	0.0552176	169.707	0.141422	201.868	0.168223	134.764	0.112303	178.286	0.148572	175.236	0.14603	115.384	0.0961533
α-Terpineol	1200		0		0		0	3.08877	0.00257398	10.885	0.00907087	3.63112	0.00302593	2.91106	0.00242589	16.7547	0.0139622	3.52618	0.00293848	7.16745	0.00597287	21.6941	0.0180784	7.96329	0.00663608	16.5671	0.0138059	24.6189	0.0205157	12.6336	0.010528	11.2451	0.0093709	10.6322	0.00886015	7.60997	0.00634164
Caryophyllene	64	279.195	4.36242	475.474	7.42928	387.364	6.05255	542.637	8.47871	437.063	6.82911	455.374	7.11522	13.547	0.211672	13.8442	0.216315	15.0277	0.234808	236.978	3.70278	264.093	4.12645	154.26	2.41031	13.1679	0.205748	12.6673	0.197926	12.4005	0.193758	187.145	2.92415	183.427	2.86604	124.725	1.94882
Humulene	160	39.821	0.248881	61.4587	0.384117	51.9504	0.32469	71.0012	0.443757	61.1383	0.382115	59.1624	0.369765		0		0		0	33.6622	0.210389	37.5955	0.234972	26.3714	0.164822		0		0		0	29.3159	0.183224	29.8386	0.186491	22.4842	0.140526
Caryophyllene oxide	410		0		0		0	17.0628	0.0416167	15.9661	0.0389418	14.1451	0.0345003		0		0		0		0		0		0		0		0		0		0		0		0
1-Hexanol	5.6	10.8112	1.93057	10.1321	1.80931	16.0767	2.87084	11.8779	2.12105	10.1813	1.81809	12.046	2.15108	9.29447	1.65973	9.01371	1.60959	8.93538	1.5956	13.249	2.36589	19.0133	3.39524	11.7117	2.09138	15.6052	2.78664	18.4656	3.29744	12.153	2.17019	15.3007	2.73226	18.9114	3.37703	16.6023	2.96469
Tetradecane	1000	9.94952	0.00994952	10.6242	0.0106242	10.6168	0.0106168	10.1901	0.0101901	11.1143	0.0111143	10.5101	0.0105101	10.2192	0.0102192	11.1095	0.0111095	10.8949	0.0108949	10.247	0.010247	11.2138	0.0112138	9.6482	0.0096482	13.7818	0.0137818	12.7923	0.0127923	12.5545	0.0125545	11.7575	0.0117575	11.1372	0.0111372	10.3859	0.0103859
Hexadecane	350000	11.4491	3.27117e-05	13.6366	3.89618e-05	10.4401	2.98289e-05	11.5465	3.29901e-05	12.4365	3.55329e-05	11.4238	3.26395e-05	9.92129	2.83465e-05	10.2646	2.93273e-05	10.6849	3.05282e-05	11.4292	3.26549e-05	11.1792	3.19404e-05	10.2617	2.9319e-05	12.3396	3.52559e-05	14.0707	4.02019e-05	13.345	3.81287e-05	15.235	4.35286e-05	10.6746	3.04989e-05	10.0585	2.87386e-05

## Sheet: Preliminary Screening
Petal	ZNH-1	ZNH-2	ZNH-3	KF-1	KF-2	KF-3	PLD-1	PLD-2	PLD-3	LS-1	LS-2	LS-3	ZQ-1	ZQ-2	ZQ-3	YMY-1	YMY-2	YMY-3
α-Pinene	12.4907	5.86921	18.0887	32.0018	23.3232	16.5948	49.5524	52.8619	81.3476	17.9822	34.5686	48.1184	41.4122	45.0488	43.2943	36.9239	37.7577	32.1503
Sabinen	0.080738	0.0443998	0.128796	0.257043	0.185602	0.198928	0.316648	0.320552	0.64911	0.143335	0.240121	0.348188	0.375381	0.557906	0.297751	0.456883	0.288662	0.224557
β-Pinene	0.00285317	0.00134162	0.004266	0.00744631	0.00533058	0.00418526	0.0117577	0.0122271	0.0189744	0.00438831	0.00791549	0.0109406	0.0097753	0.0103565	0.0107842	0.00886879	0.00835385	0.00716557
β-Myrcene	30.507	15.1354	45.2702	81.5366	61.7564	35.4304	105.058	129.165	196.007	45.45	84.6781	100.646	100.228	109.931	103.092	89.7986	84.9189	67.692
α-Phellandrene	0	0	0	0	0	0	0.0649254	0.0475558	0.0713029	0	0	0	0.0355196	0.0328322	0.0312183	0	0	0
α-Terpinene	0.437285	0.20265	0.622722	1.03519	0.773791	0.383978	1.68834	1.93002	2.627	0.697583	1.30788	1.50848	1.27076	0.857109	1.46845	0.872695	1.11062	1.00649
Limonene	1.35286	0.685391	2.11578	3.60153	2.69338	1.83542	5.24627	5.84987	9.02322	2.30831	3.9932	4.81392	4.83529	4.66888	4.87268	4.47445	3.94277	3.3818
Eucalyptol	95.6145	57.2372	146.539	238.942	172.365	160.86	367.197	376.261	521.875	148.359	236.59	294.497	359.425	320.045	391.829	330.912	277.954	246.941
β-cis-Ocimene	0	0	0	0	0	0	0.075666	0.0910838	0.148185	0	0	0	0.0778396	0.0775353	0.110301	0.0631704	0.060559	0.0425017
γ-Terpinene	0.065269	0.0320701	0.0965962	0.156758	0.114094	0.071158	0.258417	0.279264	0.370107	0.103826	0.185332	0.220342	0.220981	0.14521	0.266961	0.16276	0.184706	0.164048
Terpinolene	0.0731809	0.0344179	0.115426	0.201389	0.139216	0.0942111	0.312001	0.348333	0.455664	0.113826	0.217879	0.260476	0.313971	0.222451	0.376344	0.242907	0.256213	0.214304
Terpinen-4-ol	0.0570135	0.0299742	0.0822644	0.175016	0.078677	0.0755874	0.175141	0.172917	0.248509	0.100531	0.153233	0.135606	0.355878	0.303618	0.581553	0.307494	0.323912	0.255712
α-Terpineol	0.0201816	0.0140366	0.0420191	0.0643598	0.037941	0.0339407	0.05967	0.0542859	0.0811215	0.0350941	0.0479147	0.0544697	0.144169	0.167356	0.280711	0.106561	0.102664	0.0977022
Caryophyllene	11.2151	8.11925	12.7708	8.30689	12.6167	2.88052	0	0	0	3.54224	6.34623	1.86855	0.23564	0.256284	0.237134	1.96102	3.21327	3.48226
Humulene	0.585517	0.419043	0.606441	0.412662	0.622249	0.167861	0	0	0	0.197991	0.322359	0.123425	0	0	0	0.137091	0.186657	0.201021
Caryophyllene oxide	0	0	0	0	0	0	0.254292	0.298227	0.219433	0	0	0	0	0	0	0	0	0
Tetradecane	0.0683008	0.0866886	0.100862	0.0845462	0.077474	0.0502982	0.0744729	0.0855465	0.0770081	0.0665925	0.0601372	0.0649432	0.112378	0.0981216	0.139866	0.08975	0.114504	0.0877204
Hexadecane	0.000101525	0.00013793	0.000139997	0.000107222	8.62195e-05	9.05543e-05	6.79821e-05	8.07571e-05	5.7326e-05	9.21315e-05	6.7908e-05	9.10331e-05	0.000100521	0.00010746	0.000157402	7.34268e-05	8.56135e-05	7.95623e-05
Stamen	ZNH-1	ZNH-2	ZNH-3	KF-1	KF-2	KF-3	PLD-1	PLD-2	PLD-3	LS-1	LS-2	LS-3	ZQ-1	ZQ-2	ZQ-3	YMY-1	YMY-2	YMY-3
α-Pinene	4.92495	6.7663	3.8157	5.82574	16.6651	8.77316	15.2452	21.8315	25.48	9.05128	13.4513	8.29036	26.7973	27.5476	27.3432	19.5942	14.242	12.2447
Sabinen	0.0340284	0.0650603	0.0345953	0.0396232	0.0846932	0.0583922	0.12907	0.158019	0.232991	0.0637733	0.0893263	0.0523624	0.205081	0.216257	0.198739	0.14446	0.0727291	0.0688904
β-Pinene	0.00153874	0.00216065	0.00116758	0.0019926	0.00582424	0.00316494	0.00469931	0.0059558	0.00784723	0.00326244	0.00454971	0.00260987	0.00935387	0.00923924	0.00956878	0.00715465	0.00557721	0.00477632
β-Myrcene	18.8829	21.0272	16.6791	66.4871	56.5988	29.6871	35.0898	39.3849	69.0049	25.0439	36.8646	18.4868	89.5903	83.0715	88.8312	70.951	48.6881	41.514
α-Phellandrene	0	0	0	0	0	0	0.0379408	0.0365983	0.0359328	0	0	0	0.0803449	0.0613581	0.0604382	0	0	0
α-Terpinene	0.387662	0.48003	0.243718	0.53111	1.66489	0.824426	0.894056	0.989299	1.46299	0.843198	1.23474	0.63187	2.17467	2.00376	2.35915	1.64549	1.35391	1.18317
Limonene	1.41063	1.79495	0.95497	1.76676	4.93534	2.77341	2.93759	3.08889	4.73245	2.67846	3.67815	1.99368	6.98076	6.53633	7.54867	5.25142	4.28462	3.74731
Eucalyptol	95.6291	116.72	62.6476	113.855	314.127	176.498	273.963	226.158	365.872	176.839	216.814	162.672	465.188	453.355	432.681	408.171	317.195	295.699
β-Ocimene	0	0	0	0	0	0	0	0	0	0	0	0	0.0779275	0.0694624	0.0689592	0.0708365	0.0543407	0.0315767
γ-Terpinene	0.0799987	0.0938243	0.0464236	0.0964129	0.290139	0.154236	0.190429	0.161364	0.282191	0.155873	0.219108	0.131882	0.408715	0.378634	0.434479	0.335341	0.285949	0.240858
Terpinolene	0.108094	0.126794	0.066995	0.127892	0.380016	0.206501	0.24608	0.195191	0.361164	0.192423	0.2705	0.163338	0.537995	0.502979	0.561351	0.441036	0.374636	0.302285
Terpinen-4-ol	0.016448	0.0219699	0.00992818	0.0265084	0.0940673	0.0468732	0.0932637	0.0589938	0.119453	0.0522698	0.071267	0.0587966	0.131322	0.139466	0.148067	0.171437	0.144871	0.102894
α-Terpineol	0.00108063	0.00236076	0.000760305	0.00289596	0.00760878	0.00691672	0.00619192	0.00347742	0.00911077	0.00499988	0.00595153	0.00641728	0.0177857	0.0169813	0.0160408	0.0195967	0.010586	0.00890354
Caryophyllene	45.2784	54.871	42.9234	50.0845	32.0031	58.1984	0	0	0	26.4765	18.9272	19.0468	0	0	0	22.6731	30.4132	20.7526
Humulene	2.46711	2.9111	2.14075	2.63795	1.53706	3.1091	0	0	0	1.26111	0.808746	0.883298	0	0	0	1.09689	1.4343	0.990482
Caryophyllene oxide	0.527175	0.505312	0.292695	0.612362	0.114139	0.719793	0	0	0	0.161644	0.0432071	0.067672	0	0	0	0.193662	0.149441	0.1023
1-Hexanol	1.68715	1.6478	1.76683	1.89552	1.72638	1.63266	0	0	0	1.76167	1.80963	1.68387	1.84028	1.81481	1.6482	1.62554	1.75914	1.85809
Tetradecane	0.0118895	0.0137359	0.0126985	0.0136485	0.0166649	0.014213	0.0129782	0.0126829	0.0160191	0.0145489	0.0146335	0.0129905	0.0149794	0.0153923	0.0167472	0.0187019	0.0141747	0.0130338
Hexadecane	2.68119e-05	2.73751e-05	2.60788e-05	0	0	0	0	0	0	0	0	0	2.78876e-05	2.70045e-05	2.72415e-05	2.7669e-05	2.60004e-05	2.54552e-05
Receptacle	ZNH-1	ZNH-2	ZNH-3	KF-1	KF-2	KF-3	PLD-1	PLD-2	PLD-3	LS-1	LS-2	LS-3	ZQ-1	ZQ-2	ZQ-3	YMY-1	YMY-2	YMY-3
α-Pinene	1.43692	3.25757	2.09204	1.46331	3.48409	1.90288	5.17529	11.0744	9.55488	1.6353	3.39179	4.73738	5.50401	6.00562	5.69504	3.56255	4.22051	2.64145
Sabinen	0.00178376	0.00389303	0.00331737	0.00174414	0.00319123	0.00242346	0	0	0	0.00154222	0.00485275	0.0111326	0.017368	0.0205289	0.0161326	0.0161362	0.00316874	0.00173042
β-Pinene	0.000395453	0.000941382	0.000552224	0.000506426	0.00131207	0.000723098	0.00155388	0.00338362	0.00261027	0.000590155	0.0011758	0.00127929	0.00233355	0.00230192	0.00222207	0.00171026	0.00177518	0.00115391
β-Myrcene	0	0	0	0	0	0	6.6245	24.2674	14.177	0	0	0	13.6145	12.2043	10.3405	9.74179	7.94338	5.26275
α-Phellandrene	0	0	0	0	0	0	0.0495756	0.0956563	0.0323944	0	0	0	0	0	0	0.00623492	0.0312268	0.0165769
α-Terpinene	0.0810052	0.206108	0.104853	0.171674	0.530107	0.260264	0.646194	1.67063	1.03956	0.204774	0.438103	0.390288	0.788308	0.73521	0.768625	0.615924	0.883612	0.56291
Limonene	0.281491	0.634747	0.305108	0.468762	1.34598	0.680373	1.36682	3.49993	2.22565	0.485301	0.932579	0.870576	2.23649	2.10363	2.05154	1.70183	2.14012	1.40006
Eucalyptol	99.2212	138.743	72.5586	134.777	310.375	165.572	238.033	454.504	349.895	164.107	302.379	169.892	490.012	428.584	425.638	461.724	383.307	301.311
γ-Terpinene	0.0249565	0.0510881	0.0245197	0.0412363	0.119647	0.058783	0.128483	0.329664	0.202877	0.0522066	0.101613	0.0817416	0.205439	0.183732	0.186518	0.162678	0.198872	0.134054
Terpinolene	0.030581	0.0669048	0.0286598	0.0521317	0.158751	0.0737549	0.158577	0.441192	0.257567	0.065227	0.13181	0.0990799	0.277554	0.245208	0.25118	0.219473	0.258272	0.170188
Terpinen-4-ol	0.00977081	0.0158222	0.0092937	0.0241058	0.0862116	0.0344575	0.0285828	0.14698	0.0637008	0.0451144	0.134305	0.0552176	0.141422	0.168223	0.112303	0.148572	0.14603	0.0961533
α-Terpineol	0	0	0	0.00257398	0.00907087	0.00302593	0.00242589	0.0139622	0.00293848	0.00597287	0.0180784	0.00663608	0.0138059	0.0205157	0.010528	0.0093709	0.00886015	0.00634164
Caryophyllene	4.36242	7.42928	6.05255	8.47871	6.82911	7.11522	0.211672	0.216315	0.234808	3.70278	4.12645	2.41031	0.205748	0.197926	0.193758	2.92415	2.86604	1.94882
Humulene	0.248881	0.384117	0.32469	0.443757	0.382115	0.369765	0	0	0	0.210389	0.234972	0.164822	0	0	0	0.183224	0.186491	0.140526
Caryophyllene oxide	0	0	0	0.0416167	0.0389418	0.0345003	0	0	0	0	0	0	0	0	0	0	0	0
1-Hexanol	1.93057	1.80931	2.87084	2.12105	1.81809	2.15108	1.65973	1.60959	1.5956	2.36589	3.39524	2.09138	2.78664	3.29744	2.17019	2.73226	3.37703	2.96469
Tetradecane	0.00994952	0.0106242	0.0106168	0.0101901	0.0111143	0.0105101	0.0102192	0.0111095	0.0108949	0.010247	0.0112138	0.0096482	0.0137818	0.0127923	0.0125545	0.0117575	0.0111372	0.0103859
Hexadecane	3.27117e-05	3.89618e-05	2.98289e-05	3.29901e-05	3.55329e-05	3.26395e-05	2.83465e-05	2.93273e-05	3.05282e-05	3.26549e-05	3.19404e-05	2.9319e-05	3.52559e-05	4.02019e-05	3.81287e-05	4.35286e-05	3.04989e-05	2.87386e-05

## Sheet: Last Chioce
Petal	ZNH-1	ZNH-2	ZNH-3	KF-1	KF-2	KF-3	PLD-1	PLD-2	PLD-3	LS-1	LS-2	LS-3	ZQ-1	ZQ-2	ZQ-3	YMY-1	YMY-2	YMY-3
α-Pinene	12.4907	5.86921	18.0887	32.0018	23.3232	16.5948	49.5524	52.8619	81.3476	17.9822	34.5686	48.1184	41.4122	45.0488	43.2943	36.9239	37.7577	32.1503
β-Myrcene	30.507	15.1354	45.2702	81.5366	61.7564	35.4304	105.058	129.165	196.007	45.45	84.6781	100.646	100.228	109.931	103.092	89.7986	84.9189	67.692
α-Terpinene	0.437285	0.20265	0.622722	1.03519	0.773791	0.383978	1.68834	1.93002	2.627	0.697583	1.30788	1.50848	1.27076	0.857109	1.46845	0.872695	1.11062	1.00649
Limonene	1.35286	0.685391	2.11578	3.60153	2.69338	1.83542	5.24627	5.84987	9.02322	2.30831	3.9932	4.81392	4.83529	4.66888	4.87268	4.47445	3.94277	3.3818
Eucalyptol	95.6145	57.2372	146.539	238.942	172.365	160.86	367.197	376.261	521.875	148.359	236.59	294.497	359.425	320.045	391.829	330.912	277.954	246.941
Caryophyllene	11.2151	8.11925	12.7708	8.30689	12.6167	2.88052	0	0	0	3.54224	6.34623	1.86855	0.23564	0.256284	0.237134	1.96102	3.21327	3.48226
Stamen	ZNH-1	ZNH-2	ZNH-3	KF-1	KF-2	KF-3	PLD-1	PLD-2	PLD-3	LS-1	LS-2	LS-3	ZQ-1	ZQ-2	ZQ-3	YMY-1	YMY-2	YMY-3
α-Pinene	4.92495	6.7663	3.8157	5.82574	16.6651	8.77316	15.2452	21.8315	25.48	9.05128	13.4513	8.29036	26.7973	27.5476	27.3432	19.5942	14.242	12.2447
β-Myrcene	18.8829	21.0272	16.6791	66.4871	56.5988	29.6871	35.0898	39.3849	69.0049	25.0439	36.8646	18.4868	89.5903	83.0715	88.8312	70.951	48.6881	41.514
α-Terpinene	0.387662	0.48003	0.243718	0.53111	1.66489	0.824426	0.894056	0.989299	1.46299	0.843198	1.23474	0.63187	2.17467	2.00376	2.35915	1.64549	1.35391	1.18317
Limonene	1.41063	1.79495	0.95497	1.76676	4.93534	2.77341	2.93759	3.08889	4.73245	2.67846	3.67815	1.99368	6.98076	6.53633	7.54867	5.25142	4.28462	3.74731
Eucalyptol	95.6291	116.72	62.6476	113.855	314.127	176.498	273.963	226.158	365.872	176.839	216.814	162.672	465.188	453.355	432.681	408.171	317.195	295.699
Caryophyllene	45.2784	54.871	42.9234	50.0845	32.0031	58.1984	0	0	0	26.4765	18.9272	19.0468	0	0	0	22.6731	30.4132	20.7526
Humulene	2.46711	2.9111	2.14075	2.63795	1.53706	3.1091	0	0	0	1.26111	0.808746	0.883298	0	0	0	1.09689	1.4343	0.990482
1-Hexanol	1.68715	1.6478	1.76683	1.89552	1.72638	1.63266	0	0	0	1.76167	1.80963	1.68387	1.84028	1.81481	1.6482	1.62554	1.75914	1.85809
Receptacle	ZNH-1	ZNH-2	ZNH-3	KF-1	KF-2	KF-3	PLD-1	PLD-2	PLD-3	LS-1	LS-2	LS-3	ZQ-1	ZQ-2	ZQ-3	YMY-1	YMY-2	YMY-3
α-Pinene	1.43692	3.25757	2.09204	1.46331	3.48409	1.90288	5.17529	11.0744	9.55488	1.6353	3.39179	4.73738	5.50401	6.00562	5.69504	3.56255	4.22051	2.64145
β-Myrcene	0	0	0	0	0	0	6.6245	24.2674	14.177	0	0	0	13.6145	12.2043	10.3405	9.74179	7.94338	5.26275
α-Terpinene	0.0810052	0.206108	0.104853	0.171674	0.530107	0.260264	0.646194	1.67063	1.03956	0.204774	0.438103	0.390288	0.788308	0.73521	0.768625	0.615924	0.883612	0.56291
Limonene	0.281491	0.634747	0.305108	0.468762	1.34598	0.680373	1.36682	3.49993	2.22565	0.485301	0.932579	0.870576	2.23649	2.10363	2.05154	1.70183	2.14012	1.40006
Eucalyptol	99.2212	138.743	72.5586	134.777	310.375	165.572	238.033	454.504	349.895	164.107	302.379	169.892	490.012	428.584	425.638	461.724	383.307	301.311
Caryophyllene	4.36242	7.42928	6.05255	8.47871	6.82911	7.11522	0.211672	0.216315	0.234808	3.70278	4.12645	2.41031	0.205748	0.197926	0.193758	2.92415	2.86604	1.94882
1-Hexanol	1.93057	1.80931	2.87084	2.12105	1.81809	2.15108	1.65973	1.60959	1.5956	2.36589	3.39524	2.09138	2.78664	3.29744	2.17019	2.73226	3.37703	2.96469
